# Supplementary material
Source: PubMed Central journal article supplement (PMC5067193)
Supplement: NIHMS802831-supplement-1.pdf [file NIHMS802831-supplement-1.pdf]

Supplementary Table 1. Original and Bootstrap Standard Error of the Mean for Behaviors

| Behavior           | Original |         |      | Bootstrap |         |      |      |
|--------------------|----------|---------|------|-----------|---------|------|------|
|                    | Control  | M ± SEM | SEM  | HD        | M ± SEM | SEM  |      |
| Coo Vocalization   |          |         |      |           |         |      |      |
| Alone              |          | 0.0     | 0.0  | 0.0       | 20.0    | 9.0  | 6.1  |
| Profile            |          | 0.0     | 0.0  | 0.0       | 19.5    | 5.5  | 3.7  |
| Stare              |          | 0.0     | 0.0  | 0.0       | 11.0    | 10.0 | 6.8  |
| Freezing           |          |         |      |           |         |      |      |
| Alone              |          | 0.0     | 0.0  | 0.0       | 0.0     | 0.0  | 0.0  |
| Profile            |          | 120     | 15.6 | 10.8      | 38.9    | 15.4 | 10.5 |
| Stare              |          | 3.2     | 3.1  | 2.2       | 0.0     | 0.0  | 0.0  |
| Hostile Behaviors  |          |         |      |           |         |      |      |
| Alone              |          | 0.0     | 0.0  | 0.0       | 9.5     | 4.5  | 3.1  |
| Profile            |          | 0.5     | 0.5  | 0.35      | 11.0    | 3.0  | 2.0  |
| Stare              |          | 26.5    | 12.5 | 8.7       | 24.5    | 16.5 | 11.2 |
| Motor Stereotypies |          |         |      |           |         |      |      |
| Alone              |          | 0.0     | 0.0  | 0.0       | 2.0     | 2.0  | 1.4  |
| Profile            |          | 0.0     | 0.0  | 0.0       | 1.5     | 0.5  | 0.3  |
| Stare              |          | 0.0     | 0.0  | 0.0       | 0.5     | 0.5  | 0.3  |

Mean (M) and standard error of the mean (SEM) for behaviors scored by condition of the human intruder task for controls and HD monkeys. Original SEM indicates the SEM for the original repeated measures ANOVA model. Bootstrap SEM indicates the adjusted SEM after applying a bootstrap with 200 replications to the repeated measures ANOVA model.
