# Supplementary material
Source: PubMed Central journal article supplement (PMC5067193)
Supplement: NIHMS802831-supplement-2.pdf [file NIHMS802831-supplement-2.pdf]

Supplementary Table 2. Original and Bootstrap Standard Error of the Mean for Physiological Stress Response

| Behavior                                   | Control | Original |       | Bootstrap | HD | Original |       | Bootstrap |
|--------------------------------------------|---------|----------|-------|-----------|----|----------|-------|-----------|
|                                            |         | M        | ± SEM | SEM       |    | M        | ± SEM | SEM       |
| <b>Cortisol</b>                            |         |          |       |           |    |          |       |           |
| Pre-stress                                 |         | 15.4     | 2.2   | 1.6       |    | 14.2     | 0.6   | 0.4       |
| Post-stress                                |         | 19.6     | 1.5   | 1.1       |    | 19.1     | 1.0   | 0.7       |
| 24hr Post                                  |         | 15.7     | 2.9   | 2.1       |    | 15.5     | 2.7   | 2.0       |
| <b>Interleukin 6 (IL6)</b>                 |         |          |       |           |    |          |       |           |
| Pre-stress                                 |         | 0.1      | 0.03  | 0.02      |    | 0.7      | 0.3   | 0.2       |
| Post-stress                                |         | 1.5      | 0.4   | 0.3       |    | 4.0      | 0.7   | 0.5       |
| 24hr Post                                  |         | 0.3      | 0.04  | 0.03      |    | 1.0      | 0.14  | 0.10      |
| <b>Tumor Necrosis Factor alpha (TNF-α)</b> |         |          |       |           |    |          |       |           |
| Pre-stress                                 |         | 10.0     | 1.1   | 0.8       |    | 28.9     | 1.0   | 0.7       |
| Post-stress                                |         | 11.1     | 2.2   | 1.6       |    | 27.8     | 0.4   | 0.3       |
| 24hr Post                                  |         | 9.0      | 0.06  | 0.05      |    | 29.5     | 7.0   | 5.1       |
| <b>C-Reactive Protein (CRP)</b>            |         |          |       |           |    |          |       |           |
| Pre-stress                                 |         | 268      | 196   | 133       |    | 257      | 158   | 116       |
| Post-stress                                |         | 239      | 164   | 111       |    | 229      | 116   | 85.9      |
| 24hr Post                                  |         | 131      | 22.1  | 15.0      |    | 320      | 37.2  | 27.5      |

Mean (M) and standard error of the mean (SEM) for physiological stress measured immediately before (Pre-stress), after (Post-stress), and 24 hours after (24hr Post) the human intruder task for controls and HD monkeys. Original SEM indicates the SEM for the original repeated measures ANOVA model. Bootstrap SEM indicates the adjusted SEM after applying a bootstrap with 200 replications to the repeated measures ANOVA model.
