# Supplementary material
Source: PubMed Central journal article supplement (PMC5067193)
Supplement: NIHMS802831-supplement-3.pdf [file NIHMS802831-supplement-3.pdf]

Supplementary Table 3. Gene enrichment statistics for HD and control monkeys.

1

| NAME                            | SIZE | HD_ES    | HD_NES  | HD_NOM p-val | HD_FDR q-val | HD_FWER p-val | HD_RANK AT MAX | HD_LEADING EDGE                | Control_ES | Control_NES | Control_NOM p-val | Control_FDR q-val | Control_FWER p-val | Control_RANK AT MAX | Control_LEADING EDGE           |
|---------------------------------|------|----------|---------|--------------|--------------|---------------|----------------|--------------------------------|------------|-------------|-------------------|-------------------|--------------------|---------------------|--------------------------------|
| GSE15750_DAY6_VS_DAY10_EFF_CD8  | 182  | 0.601966 | 1.99195 | 0            | 0.00219134   | 0.002         | 2490           | tags=43%, list=16%, signal=51% | 0.640164   | 2.14399     | 0                 | 0                 | 0                  | 2659                | tags=51%, list=17%, signal=61% |
| GSE10325_LUPUS_BCELL_VS_LUPUS_U | 173  | 0.564383 | 1.88885 | 0            | 0.0173238    | 0.032         | 2597           | tags=42%, list=16%, signal=50% | -0.306419  | -1.18053    | 0.0944444         | 0.445627          | 1                  | 2971                | tags=35%, list=19%, signal=43% |
| GSE34205_HEALTHY_VS_TSV_INF_INI | 170  | 0.554122 | 1.86431 | 0            | 0.0227743    | 0.063         | 1927           | tags=35%, list=12%, signal=39% | 0.456606   | 1.52546     | 0.00125471        | 0.114593          | 1                  | 2639                | tags=35%, list=16%, signal=41% |
| GSE15750_DAY6_VS_DAY10_TRAFFICK | 181  | 0.559493 | 1.86376 | 0            | 0.0173465    | 0.064         | 1995           | tags=36%, list=12%, signal=41% | 0.656232   | 2.21221     | 0                 | 0                 | 0                  | 2666                | tags=54%, list=17%, signal=64% |
| GSE24634_IL4_VS_CTRL_TREATED_N  | 178  | 0.560975 | 1.86279 | 0            | 0.0138772    | 0.064         | 2468           | tags=37%, list=15%, signal=43% | 0.551904   | 1.85092     | 0                 | 0.0055607         | 0.083              | 2949                | tags=42%, list=18%, signal=50% |
| GSE29614_CTRL_VS_DAY7_TIV_FLU_U | 162  | 0.5622   | 1.85426 | 0            | 0.0133765    | 0.074         | 2658           | tags=43%, list=17%, signal=51% | 0.635253   | 1.22418     | 0                 | 0                 | 0                  | 2558                | tags=44%, list=16%, signal=52% |
| GSE6269_HEALTHY_VS_STREP_PNEUM  | 145  | 0.567286 | 1.84063 | 0            | 0.0153444    | 0.097         | 2961           | tags=43%, list=18%, signal=53% | 0.348713   | 1.15706     | 0.167979          | 0.485436          | 1                  | 2881                | tags=30%, list=18%, signal=37% |
| GSE11057_PBMCM_VS_MEM_CD4_TCE   | 163  | 0.545033 | 1.80889 | 0            | 0.0245244    | 0.166         | 2804           | tags=42%, list=17%, signal=51% | 0.340434   | 1.02065     | 0.045978          | 0.709703          | 1                  | 1063                | tags=105%, list=7%, signal=16% |
| CONTRACTILE_FIBER_PART          | 21   | 0.746483 | 1.80565 | 0            | 0.0224008    | 0.167         | 728            | tags=29%, list=5%, signal=30%  | 0.579175   | 1.42122     | 0.0657051         | 0.170831          | 1                  | 2730                | tags=38%, list=17%, signal=46% |
| GSE30962_PRIMARY_VS_SECONDARY   | 183  | 0.542112 | 1.80083 | 0            | 0.021252     | 0.176         | 3521           | tags=49%, list=22%, signal=62% | 0.596034   | 2.01805     | 0                 | 0.000326046       | 0.003              | 1740                | tags=36%, list=11%, signal=40% |
| GSE11057_NAIVE_CD4_VS_PBMCM_CD  | 171  | 0.542632 | 1.79168 | 0            | 0.0231642    | 0.208         | 3046           | tags=44%, list=19%, signal=54% | 0.403861   | 1.36996     | 0.0164766         | 0.215503          | 1                  | 2704                | tags=33%, list=17%, signal=39% |
| GSE12845_IJD_POS_BLOOD_VS_PRE   | 188  | 0.527088 | 1.76745 | 0            | 0.0329513    | 0.304         | 2634           | tags=39%, list=16%, signal=46% | 0.549092   | 1.87034     | 0                 | 0.00437988        | 0.057              | 2888                | tags=43%, list=18%, signal=51% |
| GSE11057_CD4_CENT_MEM_VS_PBV    | 164  | 0.535359 | 1.76349 | 0            | 0.0330813    | 0.328         | 2928           | tags=38%, list=18%, signal=47% | 0.380714   | 1.28522     | 0.0335404         | 0.305387          | 1                  | 3196                | tags=32%, list=20%, signal=39% |
| GSE22886_NAIVE_TCELL_VS_MONOC   | 179  | 0.527076 | 1.76339 | 0            | 0.0307951    | 0.328         | 2945           | tags=43%, list=18%, signal=52% | -0.332677  | -1.28074    | 0.0153601         | 0.310255          | 1                  | 2917                | tags=39%, list=18%, signal=47% |
| GSE6269_HEALTHY_VS_STREP_AUREL  | 146  | 0.542559 | 1.76046 | 0            | 0.03005      | 0.342         | 3518           | tags=51%, list=22%, signal=65% | 0.336685   | 1.12175     | 0.220796          | 0.534318          | 1                  | 2891                | tags=34%, list=18%, signal=41% |
| GSE10325_LUPUS_CD4_TCELL_VS_LU  | 175  | 0.526058 | 1.75557 | 0            | 0.0304121    | 0.368         | 2945           | tags=45%, list=18%, signal=54% | -0.317255  | -1.21741    | 0.0552764         | 0.406287          | 1                  | 2453                | tags=33%, list=15%, signal=38% |
| AMINO_ACID_DERIVATIVE_METABOL   | 19   | 0.748914 | 1.75483 | 0.00166667   | 0.0392375    | 0.375         | 2109           | tags=37%, list=13%, signal=42% | 0.328278   | 0.78239     | 0.974658          | 0.967915          | 1                  | 2131                | tags=31%, list=13%, signal=24% |
| GOLDRATH_NAIVE_VS_TCONV_CD8_TCE | 186  | 0.528893 | 1.75443 | 0            | 0.0279987    | 0.378         | 3132           | tags=45%, list=20%, signal=55% | 0.507428   | 1.73151     | 0                 | 0.0319051         | 0.503              | 2637                | tags=40%, list=16%, signal=48% |
| GSE7852_TREG_VS_TCONV_FAT51     | 179  | 0.522328 | 1.75251 | 0            | 0.0273822    | 0.388         | 2650           | tags=39%, list=17%, signal=46% | 0.290843   | 0.981018    | 0.507576          | 0.76032           | 1                  | 3007                | tags=29%, list=19%, signal=35% |
| GSE22886_NAIVE_CD8_TCELL_VS_MC  | 177  | 0.520679 | 1.75234 | 0            | 0.0260683    | 0.389         | 2945           | tags=45%, list=18%, signal=54% | -0.365099  | -1.40657    | 0                 | 0.299677          | 1                  | 2498                | tags=37%, list=16%, signal=44% |
| ATPASE_ACTIVITY_COUPLED_TO_TRA  | 21   | 0.720069 | 1.73335 | 0.00163399   | 0.0335975    | 0.483         | 1710           | tags=43%, list=11%, signal=48% | 0.537438   | 1.30088     | 0.117834          | 0.283828          | 1                  | 2829                | tags=24%, list=18%, signal=29% |
| GSE36476_CTRL_VS_TSST_ACT_40H_U | 187  | 0.515558 | 1.73144 | 0            | 0.0331515    | 0.491         | 2655           | tags=42%, list=17%, signal=49% | 0.694307   | 2.36703     | 0                 | 0                 | 0                  | 2571                | tags=56%, list=16%, signal=69% |
| GSE29618_BCELL_VS_MONOCYTE_CD4  | 178  | 0.514313 | 1.71872 | 0            | 0.038357     | 0.564         | 3069           | tags=42%, list=19%, signal=52% | 0.248766   | 0.841804    | 0.876695          | 0.913155          | 1                  | 3288                | tags=28%, list=20%, signal=35% |
| GSE11057_NAIVE_VS_MEMORY_CD4    | 172  | 0.514597 | 1.71748 | 0            | 0.0373471    | 0.571         | 2889           | tags=38%, list=18%, signal=46% | 0.272501   | 0.915579    | 0.665823          | 0.833134          | 1                  | 3048                | tags=28%, list=19%, signal=35% |
| GSE10239_NAIVE_VS_DAY4_5_EFF_CI | 184  | 0.511121 | 1.71576 | 0            | 0.0368092    | 0.581         | 2800           | tags=35%, list=17%, signal=42% | 0.480997   | 1.63583     | 0                 | 0.0656569         | 0.931              | 3341                | tags=41%, list=21%, signal=51% |
| GSE36476_CTRL_VS_TSST_ACT_72H_U | 185  | 0.512454 | 1.71561 | 0            | 0.0351991    | 0.582         | 2631           | tags=43%, list=16%, signal=51% | 0.648023   | 2.19697     | 0                 | 0                 | 0                  | 2571                | tags=52%, list=16%, signal=62% |
| GSE11057_CD4_EFF_MEM_VS_PBMCM   | 167  | 0.512493 | 1.70846 | 0            | 0.0384199    | 0.623         | 3923           | tags=54%, list=24%, signal=71% | 0.323911   | 1.08198     | 0.276942          | 0.602138          | 1                  | 3007                | tags=31%, list=19%, signal=38% |
| PROTEIN_HOMOOLOGIZATION         | 18   | 0.721451 | 1.70821 | 0.00834725   | 0.0372037    | 0.625         | 2762           | tags=61%, list=17%, signal=74% | 0.428611   | 0.991015    | 0.461538          | 0.750454          | 1                  | 3455                | tags=44%, list=22%, signal=57% |
| GSE20715_OH_VS_48H_OZONE_LUNC   | 182  | 0.509334 | 1.69976 | 0            | 0.0408137    | 0.673         | 2439           | tags=32%, list=15%, signal=38% | 0.47798    | 1.61011     | 0                 | 0.0673608         | 0.981              | 2600                | tags=34%, list=16%, signal=40% |
| GSE7852_IN_VS_THYMUS_TCONV_D    | 178  | 0.5115   | 1.69889 | 0            | 0.040032     | 0.68          | 2288           | tags=31%, list=14%, signal=36% | 0.475071   | 1.60572     | 0                 | 0.0669937         | 0.989              | 3391                | tags=42%, list=21%, signal=53% |
| GSE22886_NAIVE_CD4_TCELL_VS_MC  | 179  | 0.507161 | 1.69539 | 0            | 0.0408419    | 0.696         | 2659           | tags=40%, list=17%, signal=47% | -0.32101   | -1.22881    | 0.0476191         | 0.39045           | 1                  | 2498                | tags=35%, list=16%, signal=41% |
| GOLDRATH_EFF_VS_MEMORY_CD8_T    | 191  | 0.508766 | 1.69406 | 0            | 0.0403119    | 0.703         | 2272           | tags=36%, list=14%, signal=41% | 0.49984    | 1.69787     | 0                 | 0.0437376         | 0.678              | 2777                | tags=42%, list=17%, signal=50% |
| GSE24142_EARLY_THYMIC_PROGENIT  | 185  | 0.50909  | 1.69373 | 0            | 0.0392552    | 0.703         | 2686           | tags=36%, list=17%, signal=43% | 0.293974   | 0.994449    | 0.480503          | 0.746685          | 1                  | 1981                | tags=22%, list=12%, signal=24% |
| GSE9006_HEALTHY_VS_TYPE_1_DIAB  | 180  | 0.51261  | 1.69246 | 0            | 0.0387693    | 0.711         | 2074           | tags=29%, list=13%, signal=33% | 0.381017   | 1.2881      | 0.037037          | 0.305502          | 1                  | 2275                | tags=28%, list=14%, signal=33% |
| GSE29614_DAY3_VS_DAY7_TIV_FLU_U | 159  | 0.515094 | 1.69126 | 0            | 0.0382177    | 0.715         | 3767           | tags=50%, list=23%, signal=63% | 0.594584   | 1.94785     | 0                 | 0.000803476       | 0.009              | 2127                | tags=38%, list=13%, signal=44% |
| MYOFIBRIL                       | 18   | 0.724706 | 1.68808 | 0.00493421   | 0.0389366    | 0.722         | 728            | tags=28%, list=5%, signal=29%  | 0.485663   | 1.14255     | 0.27931           | 0.50693           | 1                  | 2730                | tags=33%, list=17%, signal=40% |
| GSE22886_NAIVE_CD8_TCELL_VS_DC  | 173  | 0.509126 | 1.68666 | 0            | 0.0387021    | 0.728         | 2631           | tags=38%, list=16%, signal=45% | 0.356738   | 1.21275     | 0.0775095         | 0.414421          | 1                  | 3608                | tags=39%, list=22%, signal=49% |
| ACTIVATION_OF_MAPK_ACTIVITY     | 39   | 0.619283 | 1.68172 | 0            | 0.040535     | 0.757         | 1790           | tags=26%, list=11%, signal=29% | 0.316269   | 0.861518    | 0.692771          | 0.897723          | 1                  | 2452                | tags=23%, list=15%, signal=27% |
| GSE36476_CTRL_VS_TSST_ACT_40H_U | 189  | 0.499154 | 1.67728 | 0            | 0.0425889    | 0.783         | 3044           | tags=41%, list=19%, signal=50% | 0.589965   | 1.99627     | 0                 | 0.000491801       | 0.005              | 2614                | tags=48%, list=16%, signal=57% |
| POSITIVE_REGULATION_OF_MAP_KIN  | 45   | 0.602301 | 1.67685 | 0            | 0.0417638    | 0.785         | 1790           | tags=24%, list=11%, signal=27% | 0.336771   | 0.946623    | 0.552308          | 0.79335           | 1                  | 2452                | tags=24%, list=15%, signal=29% |
| GSE29614_CTRL_VS_TIV_FLU_VACCIN | 141  | 0.512138 | 1.67229 | 0            | 0.042941     | 0.807         | 2497           | tags=28%, list=16%, signal=32% | 0.562499   | 1.84663     | 0                 | 0.00564065        | 0.089              | 2915                | tags=33%, list=18%, signal=40% |
| ATPASE_ACTIVITY_COUPLED_TO_MO   | 34   | 0.62528  | 1.66892 | 0.00447761   | 0.0437542    | 0.821         | 3340           | tags=50%, list=21%, signal=63% | 0.352984   | 0.939653    | 0.546154          | 0.79984           | 1                  | 1007                | tags=9%, list=6%, signal=9%    |
| GSE22886_NAIVE_CD4_TCELL_VS_DC  | 182  | 0.50094  | 1.66726 | 0            | 0.0438209    | 0.828         | 3101           | tags=44%, list=19%, signal=54% | 0.372553   | 1.27135     | 0.047561          | 0.326212          | 1                  | 3940                | tags=38%, list=25%, signal=50% |
| ANION_CHANNEL_ACTIVITY          | 17   | 0.721034 | 1.66698 | 0.00658979   | 0.0430211    | 0.828         | 3639           | tags=41%, list=23%, signal=53% | 0.343019   | 0.977394    | 0.757983          | 0.958312          | 1                  | 467                 | tags=6%, list=3%, signal=6%    |
| GSE3982_MAST_CELL_VS_NKCELL_UF  | 189  | 0.502333 | 1.66688 | 0            | 0.042065     | 0.828         | 2599           | tags=35%, list=16%, signal=41% | 0.262215   | 0.892144    | 0.750311          | 0.866827          | 1                  | 2257                | tags=21%, list=14%, signal=24% |
| GSE24142_EARLY_THYMIC_PROGENIT  | 179  | 0.498064 | 1.66461 | 0            | 0.0424268    | 0.836         | 3308           | tags=42%, list=21%, signal=52% | 0.417823   | 1.4043      | 0.00611995        | 0.188097          | 1                  | 2952                | tags=36%, list=18%, signal=47% |
| GSE12366_GC_VS_NAIVE_BCELL_UP   | 177  | 0.498144 | 1.66075 | 0            | 0.0435779    | 0.849         | 2851           | tags=35%, list=18%, signal=42% | 0.388991   | 1.29795     | 0.0391909         | 0.290413          | 1                  | 2892                | tags=31%, list=18%, signal=37% |
| PRIMARY_ACTIVE_TRANSMEMBRANE    | 35   | 0.624415 | 1.66053 | 0.0060698    | 0.0428287    | 0.851         | 3340           | tags=49%, list=21%, signal=61% | 0.348643   | 0.934341    | 0.572086          | 0.805835          | 1                  | 1007                | tags=9%, list=6%, signal=9%    |
| CONTRACTILE_FIBER               | 23   | 0.682914 | 1.65904 | 0.00625      | 0.0445675    | 0.855         | 728            | tags=26%, list=5%, signal=27%  | 0.573061   | 1.43384     | 0.0375817         | 0.161264          | 1                  | 2730                | tags=35%, list=17%, signal=42% |
| GSE24142_EARLY_THYMIC_PROGENIT  | 183  | 0.497876 | 1.65789 | 0            | 0.0425669    | 0.859         | 3065           | tags=44%, list=19%, signal=53% | 0.375381   | 1.27091     | 0.0496894         | 0.326778          | 1                  | 1899                | tags=25%, list=12%, signal=28% |
| GSE7852_TREG_VS_TCONV_IN_UP     | 177  | 0.499204 | 1.65629 | 0            | 0.0426602    | 0.864         | 2907           | tags=42%, list=18%, signal=50% | 0.363969   | 1.2293      | 0.0364111         | 0.385845          | 1                  | 2588                | tags=29%, list=16%, signal=34% |
| GSE22886_NAIVE_CD4_TCELL_VS_NE  | 166  | 0.501827 | 1.65477 | 0            | 0.0427212    | 0.87          | 2187           | tags=30%, list=14%, signal=35% | 0.357624   | 1.20976     | 0.0921376         | 0.41853           | 1                  | 3433                | tags=28%, list=21%, signal=35% |
| LEADING_EDGE                    | 42   | 0.610028 | 1.65043 | 0.0030303    | 0.044553     | 0.886         | 2077           | tags=29%, list=13%, signal=33% | 0.491688   | 1.37281     | 0.0591806         | 0.214489          | 1                  | 3809                | tags=43%, list=24%, signal=56% |
| HYDROLASE_ACTIVITY_ACTING_ON_P  | 34   | 0.62528  | 1.65011 | 0.00460123   | 0.0437702    | 0.886         | 3340           | tags=50%, list=21%, signal=63% | 0.352984   | 0.955077    | 0.525038          | 0.780143          | 1                  | 1007                | tags=9%, list=6%, signal=9%    |
| GSE7852_IN_VS_FAT_TCONV_DN      | 181  | 0.494407 | 1.64987 | 0            | 0.0431119    | 0.887         | 2137           | tags=34%, list=13%, signal=38% | 0.334419   | 1.137       | 0.186076          | 0.155699          | 1                  | 3073                | tags=30%, list=19%, signal=37% |
| GSE3982_MAC_VS_NKCELL_UP        | 178  | 0.496811 | 1.64754 | 0            | 0.0437745    | 0.89          | 2785           | tags=38%, list=17%, signal=46% | 0.350426   | 1.1931      | 0.115672          | 0.433801          | 1                  | 3476                | tags=34%, list=22%, signal=43% |
| GSE29618_BCELL_VS_MONOCYTE_DA   | 175  | 0.493964 | 1.64511 | 0            | 0.0445675    | 0.897         | 3028           | tags=40%, list=19%, signal=49% | 0.251879   | 0.847468    | 0.835396          | 0.912213          | 1                  | 3380                | tags=29%, list=21%, signal=36% |
| HOMOPHILIC_CELL_ADHESION        | 15   | 0.73903  | 1.63637 | 0.00649351   | 0.0463903    | 0.923         | 2314           | tags=47%, list=14%, signal=54% | 0.621609   | 1.40119     | 0.0783333         | 0.190526          | 1                  | 3511                | tags=47%, list=22%, signal=60% |
| GSE22886_NAIVE_TCELL_VS_DC_DN   | 177  | 0.488591 | 1.636   | 0            | 0.0486407    | 0.923         | 4106           | tags=54%, list=26%, signal=71% | 0.31624    | 1.07059     | 0.314861          | 0.623051          | 1                  | 3603                | tags=36%, list=22%, signal=46% |
| GSE6269_HEALTHY_VS_E_COUL_INF_F | 140  | 0.506655 | 1.63452 | 0            | 0.0486253    | 0.927         | 2125           | tags=26%, list=13%, signal=30% | 0.362022   | 1.18738     | 0.119497          | 0.443069          | 1                  | 3604                | tags=28%, list=22%, signal=36% |
| LAMELLOPODIUM                   | 23   | 0.676497 | 1.63154 | 0.00314465   | 0.0500287    | 0.939         | 1878           | tags=30%, list=12%, signal=34% | 0.569276   | 1.42213     | 0.0566038         | 0.17004           | 1                  | 2809                |                                |

Supplementary Table 3. Gene enrichment statistics for HD and control monkeys.

2

|                                                |     |          |         |            |           |       |                                     |           |           |            |             |       |                                     |
|------------------------------------------------|-----|----------|---------|------------|-----------|-------|-------------------------------------|-----------|-----------|------------|-------------|-------|-------------------------------------|
| GSE29618_PDC_VS_MDC_UP                         | 174 | 0.470688 | 1.58335 | 0          | 0.070265  | 0.996 | 3425 tags=43%, list=21%, signal=54% | 0.380654  | 1.28577   | 0.0339394  | 0.304596    | 1     | 1544 tags=24%, list=10%, signal=26% |
| GSE24142_DN2_VS_DN3_THYMICOCYT                 | 181 | 0.47438  | 1.58272 | 0          | 0.0702791 | 0.996 | 2472 tags=30%, list=15%, signal=36% | 0.387443  | 1.32141   | 0.0223602  | 0.267058    | 1     | 3218 tags=35%, list=20%, signal=44% |
| ATPASE_ACTIVITY_COUPLED_TO_TRA                 | 17  | 0.688605 | 1.58232 | 0.00944882 | 0.0697391 | 0.996 | 1710 tags=35%, list=11%, signal=39% | 0.499494  | 1.1562    | 0.266453   | 0.486092    | 1     | 1007 tags=12%, list=6%, signal=13%  |
| GSE11974_IL4_AND_ANTI_IL12_VS_U                | 165 | 0.480543 | 1.58037 | 0          | 0.0705835 | 0.997 | 2650 tags=30%, list=17%, signal=36% | -0.268019 | -1.01789  | 0.385417   | 0.624379    | 1     | 3062 tags=33%, list=19%, signal=41% |
| CELLULAR_HOMEOSTASIS                           | 131 | 0.487383 | 1.57975 | 0          | 0.0702332 | 0.998 | 2719 tags=24%, list=17%, signal=29% | 0.441903  | 1.46195   | 0.00128866 | 0.145423    | 1     | 1994 tags=19%, list=12%, signal=22% |
| BLOOD_COAGULATION                              | 39  | 0.582862 | 1.57923 | 0.00761035 | 0.069854  | 0.998 | 2380 tags=33%, list=15%, signal=39% | 0.584471  | 1.57126   | 0.00614439 | 0.0870262   | 0.998 | 2088 tags=33%, list=13%, signal=38% |
| REGULATION_OF_BODY_FLUID_LEVEL                 | 51  | 0.556031 | 1.57804 | 0.00560224 | 0.0701765 | 0.998 | 2380 tags=27%, list=15%, signal=32% | 0.596305  | 1.73777   | 0          | 0.5302184   | 0.464 | 2396 tags=35%, list=15%, signal=41% |
| COAGULATION                                    | 40  | 0.582853 | 1.57665 | 0.013373   | 0.0705888 | 0.998 | 2380 tags=33%, list=15%, signal=38% | 0.584463  | 1.60671   | 0.00312012 | 0.0674207   | 0.987 | 2088 tags=33%, list=13%, signal=37% |
| GSE22886_NAIVE_BCELL_VS_NEUTRO                 | 164 | 0.478805 | 1.57593 | 0          | 0.0705    | 0.998 | 3387 tags=46%, list=21%, signal=57% | -0.24765  | -0.949769 | 0.619048   | 0.764041    | 1     | 2255 tags=26%, list=14%, signal=29% |
| RESPONSE_TO_CHEMICAL_STIMULUS                  | 275 | 0.455287 | 1.57401 | 0          | 0.0715587 | 0.999 | 2975 tags=24%, list=19%, signal=29% | 0.351853  | 1.23414   | 0.0458284  | 0.381281    | 1     | 3283 tags=27%, list=20%, signal=33% |
| GSE24634_TFFF_VS_TCONV_DAY7_IN                 | 177 | 0.473883 | 1.57223 | 0          | 0.0724126 | 0.999 | 3264 tags=43%, list=20%, signal=53% | 0.60077   | 2.04114   | 0          | 0.000366802 | 0.003 | 3034 tags=50%, list=19%, signal=61% |
| GSE112366_GC_VS_MEMORY_BCELL_I                 | 171 | 0.470356 | 1.56933 | 0          | 0.0740373 | 0.999 | 2467 tags=32%, list=15%, signal=37% | 0.421661  | 1.40667   | 0.00650195 | 0.185318    | 1     | 2669 tags=30%, list=17%, signal=36% |
| HEMOSTASIS                                     | 44  | 0.566267 | 1.56912 | 0.00151515 | 0.0734909 | 0.999 | 2380 tags=32%, list=15%, signal=37% | 0.602724  | 1.69129   | 0.00289017 | 0.0460781   | 0.709 | 2396 tags=39%, list=15%, signal=45% |
| GSE36476_YOUNG_VS_OLD_DONOR_CELL_CYCLE_PROCESS | 155 | 0.476576 | 1.56624 | 0          | 0.0751706 | 0.999 | 2520 tags=32%, list=16%, signal=38% | 0.293907  | 0.978538  | 0.516456   | 0.762839    | 1     | 2224 tags=19%, list=14%, signal=22% |
| GSE24142_EARLY_THYMIC_PROGENI                  | 173 | 0.473199 | 1.56246 | 0.00380228 | 0.0776813 | 1     | 2967 tags=36%, list=18%, signal=44% | 0.442512  | 1.4883    | 0          | 0.13671     | 1     | 2571 tags=36%, list=16%, signal=43% |
| GSE24142_EARLY_THYMIC_PROGENI                  | 179 | 0.468162 | 1.56171 | 0          | 0.0775833 | 1     | 2983 tags=36%, list=19%, signal=44% | 0.306647  | 1.04186   | 0.361568   | 0.679621    | 1     | 1585 tags=18%, list=10%, signal=20% |
| GSE36476_CTRL_VS_TSS2_ACT_72H_I                | 188 | 0.467622 | 1.56059 | 0.00120048 | 0.0778021 | 1     | 2631 tags=37%, list=16%, signal=43% | 0.628819  | 1.24386   | 0          | 0           | 0     | 2571 tags=51%, list=16%, signal=60% |
| REGULATION_OF_BIOLOGICAL_QUAL                  | 380 | 0.443827 | 1.56018 | 0          | 0.0773231 | 1     | 2804 tags=25%, list=17%, signal=30% | 0.407161  | 1.46317   | 0          | 0.144485    | 1     | 2572 tags=23%, list=16%, signal=26% |
| GSE29618_MONOCYTE_VS_MDC_UP                    | 176 | 0.465733 | 1.55939 | 0          | 0.0771313 | 1     | 3064 tags=40%, list=19%, signal=49% | -0.315    | -1.22945  | 0.04102556 | 0.391136    | 1     | 2060 tags=28%, list=13%, signal=32% |
| GSE22886_NAIVE_TCELL_VS_NEUTRO                 | 162 | 0.473803 | 1.55623 | 0          | 0.0788494 | 1     | 2470 tags=32%, list=15%, signal=38% | 0.333113  | 1.12272   | 0.204715   | 0.533004    | 1     | 3429 tags=27%, list=21%, signal=34% |
| GSE11057_NAIVE_VS_EFF_MEMORY_VS                | 176 | 0.470539 | 1.55603 | 0          | 0.0782018 | 1     | 3108 tags=36%, list=19%, signal=44% | -0.246557 | -0.958803 | 0.52459    | 0.749416    | 1     | 2819 tags=29%, list=18%, signal=35% |
| GSE29618_BCELL_VS_MDC_DN                       | 185 | 0.462269 | 1.55597 | 0.00121212 | 0.077524  | 1     | 4115 tags=49%, list=26%, signal=65% | 0.299321  | 1.01408   | 0.425584   | 0.723044    | 1     | 1980 tags=21%, list=12%, signal=24% |
| GSE20715_OH_VS_24H_OZONE_TLR4                  | 173 | 0.466933 | 1.55407 | 0          | 0.078421  | 1     | 3279 tags=34%, list=20%, signal=42% | 0.402134  | 1.35016   | 0.0163112  | 0.240664    | 1     | 2984 tags=29%, list=19%, signal=36% |
| GSE20715_OH_VS_48H_OZONE_TLR4                  | 189 | 0.463181 | 1.5537  | 0          | 0.0779639 | 1     | 3251 tags=34%, list=20%, signal=42% | 0.452489  | 1.54128   | 0          | 0.109883    | 1     | 2571 tags=31%, list=16%, signal=37% |
| ICOSANOID_METABOLIC_PROCESS                    | 15  | 0.683774 | 1.55336 | 0.0213816  | 0.0775938 | 1     | 2066 tags=33%, list=13%, signal=38% | 0.471725  | 1.04953   | 0.412052   | 0.663392    | 1     | 1727 tags=33%, list=14%, signal=39% |
| REGULATION_OF_MAPKK_CASCADE                    | 16  | 0.675349 | 1.55117 | 0.0214876  | 0.0788133 | 1     | 2106 tags=31%, list=13%, signal=36% | 0.543379  | 1.23357   | 0.176895   | 0.38021     | 1     | 3178 tags=38%, list=20%, signal=47% |
| LOCOMOTORY_BEHAVIOR                            | 85  | 0.509872 | 1.55015 | 0.00263505 | 0.0789505 | 1     | 1645 tags=21%, list=10%, signal=23% | 0.436341  | 1.36726   | 0.0251046  | 0.219945    | 1     | 3169 tags=31%, list=20%, signal=48% |
| CALCIUM_ION_BINDING                            | 95  | 0.502628 | 1.54948 | 0          | 0.0789111 | 1     | 2885 tags=28%, list=18%, signal=34% | 0.310065  | 0.965585  | 0.535099   | 0.77345     | 1     | 3433 tags=26%, list=21%, signal=33% |
| CELLULAR_CATION_HOMEOSTASIS                    | 92  | 0.498913 | 1.54937 | 0.00267023 | 0.0782708 | 1     | 2719 tags=24%, list=17%, signal=29% | 0.478096  | 1.50326   | 0.00672043 | 0.128172    | 1     | 1860 tags=21%, list=12%, signal=23% |
| GSE17721_LPS_VS_GARDIQUIMOD_2                  | 172 | 0.464065 | 1.54749 | 0          | 0.079383  | 1     | 3008 tags=33%, list=19%, signal=40% | 0.30861   | 1.04493   | 0.360303   | 0.674613    | 1     | 3393 tags=31%, list=21%, signal=39% |
| CELL_CYCLE_GO_0007049                          | 288 | 0.445395 | 1.54649 | 0          | 0.0795571 | 1     | 2898 tags=34%, list=18%, signal=40% | 0.425759  | 1.50085   | 0          | 0.126257    | 1     | 2586 tags=32%, list=16%, signal=37% |
| RHO_PROTEIN_SIGNAL_TRANSDUCTI                  | 34  | 0.585409 | 1.54169 | 0.0198777  | 0.0833241 | 1     | 1368 tags=26%, list=9%, signal=29%  | 0.54645   | 1.47611   | 0.0263037  | 0.137919    | 1     | 2628 tags=32%, list=16%, signal=39% |
| GSE3982_MAST_CELL_VS_EFF_MEMC                  | 179 | 0.464518 | 1.54121 | 0.00122699 | 0.0835055 | 1     | 3374 tags=41%, list=21%, signal=51% | 0.297068  | 0.996773  | 0.470303   | 0.745345    | 1     | 2944 tags=31%, list=18%, signal=37% |
| GSE29618_MONOCYTE_VS_PDC_DN                    | 161 | 0.467052 | 1.54011 | 0.00122249 | 0.0832994 | 1     | 3425 tags=38%, list=21%, signal=48% | 0.419647  | 1.39884   | 0.00988875 | 0.194171    | 1     | 2739 tags=34%, list=17%, signal=40% |
| GSE24634_TFFF_VS_TCONV_DAYS_IN                 | 180 | 0.461146 | 1.53721 | 0          | 0.0854298 | 1     | 3647 tags=43%, list=23%, signal=55% | 0.500234  | 1.70389   | 0          | 0.0411811   | 0.649 | 3034 tags=42%, list=19%, signal=51% |
| GSE27786_NKTCCELL_VS_MONO_MAC                  | 175 | 0.459984 | 1.53538 | 0.00244798 | 0.0865077 | 1     | 3385 tags=33%, list=21%, signal=42% | 0.370717  | 1.24893   | 0.0568182  | 0.360761    | 1     | 3602 tags=31%, list=22%, signal=40% |
| CELL_MATRIX_JUNCTION                           | 17  | 0.667176 | 1.53385 | 0.0096463  | 0.0872017 | 1     | 3103 tags=47%, list=19%, signal=58% | 0.614894  | 1.42535   | 0.0608974  | 0.167373    | 1     | 914 tags=18%, list=6%, signal=19%   |
| STRUCTURAL_CONSTITUENT_OF_MU                   | 31  | 0.586151 | 1.53161 | 0.0171073  | 0.0887271 | 1     | 2609 tags=29%, list=16%, signal=35% | 0.380042  | 1.00121   | 0.452599   | 0.741076    | 1     | 1320 tags=13%, list=8%, signal=14%  |
| GSE29618_BCELL_VS_PDC_DN                       | 176 | 0.457632 | 1.53006 | 0.00121212 | 0.0895    | 1     | 3480 tags=39%, list=22%, signal=49% | 0.389206  | 1.32648   | 0.0170316  | 0.265618    | 1     | 2601 tags=31%, list=16%, signal=36% |
| GSE11974_CTRL_VS_ACT_IL4_AND_A                 | 156 | 0.465131 | 1.52818 | 0.00121507 | 0.0905141 | 1     | 2638 tags=34%, list=16%, signal=40% | -0.251417 | -0.975249 | 0.577114   | 0.751183    | 1     | 2299 tags=20%, list=14%, signal=23% |
| GSE11057_NAIVE_VS_CENT_MEMORI                  | 170 | 0.463238 | 1.52423 | 0          | 0.0939462 | 1     | 3327 tags=38%, list=21%, signal=47% | 0.287222  | 0.972638  | 0.519546   | 0.770551    | 1     | 3048 tags=30%, list=19%, signal=37% |
| CATION_HOMEOSTASIS                             | 94  | 0.489733 | 1.52301 | 0.00390625 | 0.0944877 | 1     | 2719 tags=23%, list=17%, signal=28% | 0.486235  | 1.51673   | 0.00415552 | 0.117702    | 1     | 1860 tags=21%, list=12%, signal=24% |
| GSE22886_NAIVE_BCELL_VS_MONOC                  | 177 | 0.458319 | 1.52236 | 0          | 0.0943871 | 1     | 3322 tags=40%, list=21%, signal=50% | -0.286362 | -1.10545  | 0.516785   | 0.156785    | 1     | 2426 tags=32%, list=15%, signal=37% |
| GSE17721_0.5H_VS_12H_GARDIQUO                  | 170 | 0.461042 | 1.52189 | 0          | 0.0946095 | 1     | 2830 tags=31%, list=18%, signal=37% | 0.327252  | 1.10383   | 0.231631   | 0.555166    | 1     | 4114 tags=35%, list=26%, signal=47% |
| GSE112845_IJD_POS_VS_NEG_BLOOD                 | 166 | 0.459226 | 1.51897 | 0          | 0.0964649 | 1     | 4032 tags=46%, list=25%, signal=61% | 0.485664  | 1.6408    | 0          | 0.0663173   | 0.917 | 2283 tags=33%, list=14%, signal=38% |
| CELL_SUBSTRATE_ADHERENS_JUNCTI                 | 15  | 0.676573 | 1.51808 | 0.0200669  | 0.096603  | 1     | 3103 tags=47%, list=19%, signal=58% | 0.711862  | 1.60237   | 0.0217755  | 0.0671941   | 0.99  | 914 tags=20%, list=6%, signal=21%   |
| GSE29618_MONOCYTE_VS_PDC_DAY                   | 181 | 0.458245 | 1.51788 | 0.00120627 | 0.0960599 | 1     | 2623 tags=35%, list=16%, signal=42% | -0.30533  | -1.18512  | 0.0561798  | 0.442173    | 1     | 2054 tags=25%, list=14%, signal=29% |
| GSE29618_MONOCYTE_VS_MDC_DAY                   | 172 | 0.458695 | 1.51706 | 0.00377358 | 0.0960528 | 1     | 3046 tags=37%, list=19%, signal=45% | -0.293055 | -1.12743  | 0.127551   | 0.484959    | 1     | 2282 tags=28%, list=14%, signal=32% |
| HOMEOSTATIC_PROCESS                            | 185 | 0.455016 | 1.51637 | 0.00367197 | 0.0960729 | 1     | 3761 tags=31%, list=23%, signal=40% | 0.365347  | 1.23402   | 0.0658385  | 0.380211    | 1     | 1860 tags=17%, list=12%, signal=19% |
| GSE13306_RA_VS_UNTREATED_MEM                   | 176 | 0.457529 | 1.51542 | 0          | 0.0962848 | 1     | 2417 tags=30%, list=15%, signal=35% | 0.385298  | 1.29294   | 0.0418719  | 0.297289    | 1     | 2833 tags=31%, list=18%, signal=37% |
| RESPONSE_TO_BIOTIC_STIMULUS                    | 100 | 0.482087 | 1.51518 | 0.00404858 | 0.0958661 | 1     | 2289 tags=29%, list=14%, signal=34% | 0.501281  | 1.58166   | 0          | 0.0805216   | 0.997 | 3240 tags=38%, list=20%, signal=47% |
| TISSUE_REMODELING                              | 27  | 0.601895 | 1.51469 | 0.024961   | 0.0955671 | 1     | 3497 tags=33%, list=22%, signal=43% | 0.385926  | 0.977156  | 0.480315   | 0.763539    | 1     | 2984 tags=26%, list=19%, signal=32% |
| GSE7460_FOPX3_MUT_VS_WT_ACT_I                  | 177 | 0.455097 | 1.51448 | 0          | 0.0950814 | 1     | 2204 tags=30%, list=14%, signal=34% | 0.292193  | 0.99145   | 0.485607   | 0.750482    | 1     | 4140 tags=35%, list=26%, signal=47% |
| PROTEIN_HETERODIMERIZATION_ACT                 | 71  | 0.505398 | 1.51159 | 0.00972222 | 0.0976012 | 1     | 3737 tags=44%, list=23%, signal=57% | 0.41583   | 1.25038   | 0.0980114  | 0.356776    | 1     | 1541 tags=20%, list=10%, signal=22% |
| RUFFLE                                         | 29  | 0.593951 | 1.51131 | 0.0291859  | 0.0972291 | 1     | 2077 tags=34%, list=13%, signal=40% | 0.469726  | 1.23287   | 0.162287   | 0.381046    | 1     | 3809 tags=41%, list=24%, signal=54% |
| GSE29618_PRE_VS_DAY7_FLU_VACCI                 | 172 | 0.450385 | 1.50928 | 0.00243605 | 0.0985565 | 1     | 2860 tags=30%, list=18%, signal=36% | 0.428031  | 1.43914   | 0.00123305 | 0.160336    | 1     | 3368 tags=27%, list=21%, signal=34% |
| GTPASE_BINDING                                 | 28  | 0.581404 | 1.50863 | 0.0232919  | 0.0985411 | 1     | 1794 tags=32%, list=11%, signal=36% | 0.247557  | 0.635207  | 0.972222   | 0.997566    | 1     | 4106 tags=32%, list=26%, signal=43% |
| GSE17721_LPS_VS_CPNG_1H_BMDM_I                 | 181 | 0.450402 | 1.50833 | 0.0012285  | 0.0981461 | 1     | 3113 tags=34%, list=19%, signal=42% | 0.353608  | 1.1978    | 0.101818   | 0.432129    | 1     | 2579 tags=24%, list=16%, signal=28% |
| BONE_REMODELING                                | 26  | 0.604717 | 1.50824 | 0.0252366  | 0.097576  | 1     | 3295 tags=31%, list=21%, signal=39% | 0.367832  | 0.922631  | 0.577922   | 0.824857    | 1     | 2891 tags=23%, list=18%, signal=28% |
| GSE17721_PAM3CSK4_VS_GADIQUIM                  | 176 | 0.454424 | 1.50605 | 0          | 0.0991812 | 1     | 3159 tags=28%, list=20%, signal=34% | -0.271345 | -1.04012  | 0.318408   | 0.60135     | 1     | 2496 tags=23%, list=16%, signal=27% |
| GSE20366_EX_VIVO_VS_HOMEOSTAT                  | 176 | 0.454168 | 1.50489 | 0.00123153 | 0.0998655 | 1     | 3516 tags=36%, list=22%, signal=46% | 0.4184    | 1.41483   | 0.00126743 | 0.176207    | 1     | 2721 tags=29%, list=17%, signal=35% |
| GSE22886_NAIVE_VS_MEMORY_TCEL                  | 185 | 0.451546 | 1.50483 | 0          | 0.0992107 | 1     | 3978 tags=43%, list=25%, signal=57% | -0.266506 | -1.04029  | 0.319277   | 0.602162    | 1     | 1818 tags=23%, list=11%, signal=26% |
| GSE22886_NAIVE_VS_IGM_MEMORY                   | 171 | 0.457311 | 1.50409 | 0.00477897 | 0.0993515 | 1     | 3984 tags=44%, list=25%, signal=58% | 0.40531   | 1.35778   | 0.0123609  | 0.233446    | 1     | 2920 tags=36%, list=18%, signal=44% |
| REGULATION_OF_MYELOID_CELL_DIF                 | 17  | 0.649387 | 1.50232 | 0.0336     | 0.100681  | 1     | 351 tags=18%, list=2%, signal=18%   | -0.526686 | -1.31941  | 0.123153   | 0.341128    | 1     | 379 tags=24%, list=2%, signal=24%   |
| GSE24142_EARLY_THYMIC_PROGENI                  | 175 | 0.44925  | 1.50222 | 0.00492005 | 0.10014   | 1     | 3030 tags=33%, list=19%, signal=40% | 0.35675   | 1.20048   | 0.08875    | 0.428206    | 1     | 1585 tags=20%, list=10%, signal=22  |

Supplementary Table 3. Gene enrichment statistics for HD and control monkeys.

3

|                                    |     |          |         |            |          |   |                                     |           |          |            |           |       |                                     |
|------------------------------------|-----|----------|---------|------------|----------|---|-------------------------------------|-----------|----------|------------|-----------|-------|-------------------------------------|
| GSE9037_WT_VS_IRAK4_KO_LPS_1H      | 168 | 0.451599 | 1.48894 | 0          | 0.104019 | 1 | 3781 tags=37%, list=24%, signal=48% | 0.246839  | 0.825891 | 0.873724   | 0.930001  | 1     | 3073 tags=20%, list=19%, signal=24% |
| GSE24634_TREG_VS_TCONV_POST_D      | 179 | 0.449486 | 1.48839 | 0          | 0.103979 | 1 | 2055 tags=27%, list=13%, signal=31% | 0.287073  | 0.970165 | 0.535802   | 0.77331   | 1     | 2998 tags=30%, list=19%, signal=36% |
| GSE3982_MAC_VS_EFF_MEMORY_CC       | 177 | 0.447717 | 1.48745 | 0          | 0.104662 | 1 | 2634 tags=33%, list=16%, signal=39% | 0.321538  | 1.08996  | 0.257463   | 0.582453  | 1     | 3221 tags=29%, list=20%, signal=36% |
| REGULATION_OF_KINASE_ACTIVITY      | 145 | 0.456397 | 1.48732 | 0.00248447 | 0.104146 | 1 | 1790 tags=23%, list=11%, signal=25% | 0.310602  | 1.03438  | 0.381378   | 0.692042  | 1     | 2586 tags=24%, list=16%, signal=29% |
| GSE11924_TFH_VS_TH2_CD4_TCELL      | 173 | 0.444548 | 1.48724 | 0.00251572 | 0.103597 | 1 | 2853 tags=25%, list=18%, signal=31% | 0.334403  | 1.12554  | 0.204715   | 0.536154  | 1     | 2910 tags=24%, list=18%, signal=29% |
| GSE3982_EOSINOPHIL_VS_TH1_UP       | 170 | 0.448485 | 1.48671 | 0.00121951 | 0.10362  | 1 | 3316 tags=37%, list=21%, signal=46% | 0.261958  | 0.885256 | 0.771182   | 0.874346  | 1     | 2271 tags=19%, list=14%, signal=22% |
| RESPONSE_TO_BACTERIUM              | 26  | 0.596778 | 1.48464 | 0.030561   | 0.105456 | 1 | 3590 tags=46%, list=22%, signal=59% | 0.511155  | 1.28501  | 0.122816   | 0.305199  | 1     | 1968 tags=31%, list=12%, signal=35% |
| GSE24634_TREG_VS_TCONV_POST_D      | 178 | 0.443154 | 1.48348 | 0          | 0.106375 | 1 | 3126 tags=37%, list=19%, signal=46% | 0.658176  | 2.20474  | 0          | 0         | 0     | 2846 tags=50%, list=18%, signal=60% |
| GSE3982_MAC_VS_TH2_UP              | 181 | 0.444287 | 1.48337 | 0.00118906 | 0.105858 | 1 | 3305 tags=38%, list=21%, signal=47% | 0.268266  | 0.909236 | 0.688889   | 0.838812  | 1     | 3221 tags=27%, list=20%, signal=33% |
| MYOBLAST_DIFFERENTIATION           | 16  | 0.655974 | 1.48335 | 0.0363636  | 0.105264 | 1 | 924 tags=19%, list=6%, signal=20%   | 0.53381   | 1.20959  | 0.222591   | 0.41845   | 1     | 2701 tags=31%, list=17%, signal=38% |
| RESPONSE_TO_HORMONE_STIMULUS       | 32  | 0.57685  | 1.48325 | 0.0296412  | 0.104798 | 1 | 1486 tags=22%, list=9%, signal=24%  | -0.352153 | -0.2701  | 0.392954   | 0.613924  | 1     | 1274 tags=19%, list=8%, signal=20%  |
| GSE22886_UNSTIM_VS_IL15_STIM_N     | 190 | 0.44403  | 1.4828  | 0.00357995 | 0.104749 | 1 | 3432 tags=37%, list=21%, signal=47% | 0.470907  | 1.59438  | 0.00122549 | 0.0723777 | 0.994 | 2582 tags=35%, list=16%, signal=42% |
| GSE29618_PDC_VS_MDC_DAY7_FLU       | 181 | 0.444902 | 1.4814  | 0.00492611 | 0.105861 | 1 | 3229 tags=43%, list=20%, signal=53% | 0.268988  | 0.906735 | 0.727723   | 0.844171  | 1     | 2637 tags=25%, list=16%, signal=30% |
| GSE24634_TFFF_VS_TCONV_DAY10       | 180 | 0.442885 | 1.47976 | 0          | 0.107142 | 1 | 3427 tags=44%, list=21%, signal=55% | 0.360218  | 1.19855  | 0.103234   | 0.433004  | 1     | 3221 tags=36%, list=20%, signal=44% |
| GSE36392_TYPE_2_MYELOID_VS_MA      | 172 | 0.440622 | 1.47884 | 0.00245098 | 0.107555 | 1 | 2946 tags=25%, list=18%, signal=30% | 0.395167  | 1.33728  | 0.0236318  | 0.253582  | 1     | 3104 tags=20%, list=19%, signal=25% |
| GSE30083_SP2_VS_SP3_THYMOCYTE      | 173 | 0.438827 | 1.47569 | 0.004914   | 0.105889 | 1 | 3747 tags=36%, list=23%, signal=46% | 0.303063  | 0.101803 | 0.429299   | 0.711674  | 1     | 2433 tags=15%, list=15%, signal=18% |
| ACTIN_FILAMENT_BASED_PROCESS       | 102 | 0.468472 | 1.47507 | 0.0116429  | 0.110607 | 1 | 3266 tags=33%, list=20%, signal=42% | 0.32262   | 1.02614  | 0.393782   | 0.702536  | 1     | 2942 tags=25%, list=18%, signal=31% |
| GSE7460_TCONV_VS_TREG_LN_DN        | 177 | 0.445032 | 1.47323 | 0.00240964 | 0.112445 | 1 | 3336 tags=40%, list=21%, signal=50% | 0.360565  | 1.20798  | 0.0998736  | 0.419195  | 1     | 2560 tags=31%, list=16%, signal=36% |
| CYTOSKELETAL_PROTEIN_BINDING       | 142 | 0.454455 | 1.47181 | 0.00246914 | 0.113517 | 1 | 3140 tags=31%, list=20%, signal=38% | 0.349064  | 1.14919  | 0.177083   | 0.493162  | 1     | 2942 tags=25%, list=18%, signal=30% |
| GSE9988_ANTI_TREM1_AND_LPS_VS      | 156 | 0.447427 | 1.4706  | 0.00127877 | 0.11436  | 1 | 1504 tags=21%, list=9%, signal=23%  | 0.429936  | 1.42624  | 0.005      | 0.167743  | 1     | 2751 tags=31%, list=17%, signal=38% |
| GSE6269_E_COUL_VS_STREP_AUREUS     | 146 | 0.451486 | 1.47014 | 0          | 0.114267 | 1 | 1806 tags=29%, list=11%, signal=32% | 0.338173  | 1.11639  | 0.234839   | 0.540977  | 1     | 3497 tags=37%, list=22%, signal=47% |
| GSE29618_BCELL_VS_PDC_DAY7_FLU     | 175 | 0.439883 | 1.46883 | 0.00361011 | 0.115309 | 1 | 4019 tags=45%, list=25%, signal=59% | 0.40344   | 1.35771  | 0.0124069  | 0.231813  | 1     | 2084 tags=28%, list=13%, signal=32% |
| CELL_PROLIFERATION_GO_000823       | 472 | 0.411898 | 1.46793 | 0.0021575  | 0.115826 | 1 | 3144 tags=27%, list=20%, signal=32% | 0.343565  | 1.23786  | 0.0163043  | 0.378119  | 1     | 2932 tags=25%, list=19%, signal=29% |
| POSITIVE_REGULATION_OF_TRANSFE     | 81  | 0.48539  | 1.46737 | 0.0142653  | 0.115822 | 1 | 1790 tags=21%, list=11%, signal=24% | 0.294594  | 0.902336 | 0.663889   | 0.851496  | 1     | 2549 tags=23%, list=16%, signal=28% |
| GSE29618_BCELL_VS_MDC_DAY7_FLU     | 182 | 0.441646 | 1.46681 | 0          | 0.115888 | 1 | 3132 tags=38%, list=20%, signal=47% | -0.28386  | -1.09051 | 0.207547   | 0.532601  | 1     | 2698 tags=34%, list=17%, signal=40% |
| CALMODULIN_BINDING                 | 22  | 0.6023   | 1.46619 | 0.0382775  | 0.116129 | 1 | 1102 tags=32%, list=7%, signal=34%  | 0.431179  | 1.06349  | 0.362013   | 0.637652  | 1     | 3381 tags=45%, list=21%, signal=58% |
| EPIDERMAL_GROWTH_FACTOR_RECE       | 20  | 0.626077 | 1.46562 | 0.0424528  | 0.116255 | 1 | 2785 tags=35%, list=17%, signal=42% | 0.335552  | 0.800367 | 0.768897   | 0.955564  | 1     | 1496 tags=20%, list=9%, signal=22%  |
| GSE24634_TFFF_VS_TCONV_DAY10       | 175 | 0.442583 | 1.46456 | 0.00251889 | 0.116933 | 1 | 3339 tags=38%, list=21%, signal=48% | 0.516189  | 1.72766  | 0          | 0.0321943 | 0.519 | 2802 tags=38%, list=17%, signal=46% |
| GSE3982_EOSINOPHIL_VS_NKCELL       | 170 | 0.440652 | 1.46439 | 0.00120482 | 0.116564 | 1 | 3673 tags=40%, list=23%, signal=51% | 0.243026  | 0.818775 | 0.902558   | 0.938896  | 1     | 3090 tags=22%, list=19%, signal=27% |
| GSE37416_OH_VS_24H_F_TULARENSI     | 165 | 0.442646 | 1.46413 | 0.00249377 | 0.116268 | 1 | 3004 tags=37%, list=19%, signal=45% | -0.324215 | -1.23973 | 0.0243902  | 0.385451  | 1     | 3226 tags=39%, list=20%, signal=48% |
| PROTEIN_POLYMERIZATION             | 15  | 0.658884 | 1.46332 | 0.046589   | 0.116797 | 1 | 1152 tags=40%, list=7%, signal=43%  | 0.454667  | 1.0299   | 0.417526   | 0.700093  | 1     | 2499 tags=40%, list=16%, signal=47% |
| GSE3982_MAST_CELL_VS_MAC_DN        | 171 | 0.444715 | 1.46326 | 0.00122249 | 0.116283 | 1 | 2769 tags=31%, list=17%, signal=37% | 0.27215   | 0.913643 | 0.670556   | 0.835009  | 1     | 2474 tags=20%, list=15%, signal=24% |
| GSE1460_INTRATHYMIC_T_PROGENIT     | 179 | 0.442585 | 1.46255 | 0.00238663 | 0.116659 | 1 | 3126 tags=39%, list=19%, signal=48% | 0.480899  | 1.6273   | 0.00122549 | 0.0653209 | 0.95  | 2611 tags=35%, list=16%, signal=41% |
| SPINDLE                            | 38  | 0.533158 | 1.46012 | 0.0279001  | 0.11906  | 1 | 2967 tags=42%, list=18%, signal=52% | 0.52755   | 1.43569  | 0.0318471  | 0.163108  | 1     | 2499 tags=34%, list=16%, signal=40% |
| REGULATION_OF_CELL_MIGRATION       | 25  | 0.588756 | 1.45582 | 0.0268139  | 0.124025 | 1 | 1368 tags=24%, list=9%, signal=26%  | 0.511416  | 1.26303  | 0.152411   | 0.341092  | 1     | 1014 tags=20%, list=6%, signal=21%  |
| REGULATION_OF_CYTOKINE_PRODUC      | 23  | 0.59543  | 1.45453 | 0.0452342  | 0.125279 | 1 | 1287 tags=30%, list=8%, signal=33%  | 0.537764  | 1.31611  | 0.111811   | 0.27228   | 1     | 1045 tags=35%, list=7%, signal=37%  |
| GSE24634_IL4_VS_CTRL_TREATED_NU    | 171 | 0.439109 | 1.45451 | 0.00123457 | 0.124667 | 1 | 3694 tags=45%, list=23%, signal=58% | 0.354114  | 1.18794  | 0.111675   | 0.441692  | 1     | 2297 tags=23%, list=14%, signal=27% |
| GSE3982_DC_VS_TH2_UP               | 164 | 0.440826 | 1.45229 | 0.00492005 | 0.126974 | 1 | 4201 tags=48%, list=26%, signal=65% | 0.337901  | 1.1422   | 0.171149   | 0.507026  | 1     | 2887 tags=28%, list=18%, signal=34% |
| RESPONSE_TO_EXTERNAL_STIMULUS      | 279 | 0.418426 | 1.4511  | 0          | 0.128209 | 1 | 3217 tags=26%, list=20%, signal=32% | 0.373729  | 1.30367  | 0.0151163  | 0.283753  | 1     | 2837 tags=23%, list=18%, signal=28% |
| CYTOSKELETON                       | 328 | 0.416814 | 1.45085 | 0          | 0.127914 | 1 | 3612 tags=31%, list=23%, signal=40% | 0.409667  | 1.45217  | 0          | 0.150705  | 1     | 2572 tags=25%, list=16%, signal=29% |
| NEUROGENESIS                       | 85  | 0.468339 | 1.45074 | 0.0149254  | 0.12741  | 1 | 1140 tags=15%, list=7%, signal=16%  | 0.323195  | 1.00163  | 0.467302   | 0.742301  | 1     | 1436 tags=11%, list=9%, signal=12%  |
| GSE16522_ANTI_CD3CD28_STIM_VS      | 174 | 0.434897 | 1.45069 | 0.00239234 | 0.126873 | 1 | 3614 tags=36%, list=23%, signal=45% | 0.393185  | 1.33297  | 0.0190703  | 0.258671  | 1     | 3519 tags=34%, list=22%, signal=44% |
| GSE7852_THYMUS_VS_FAT_TCONV_I      | 181 | 0.437237 | 1.45026 | 0.00123916 | 0.126857 | 1 | 1759 tags=24%, list=11%, signal=27% | -0.265579 | -1.02807 | 0.351955   | 0.610976  | 1     | 3226 tags=33%, list=20%, signal=41% |
| GSE13229_IMM_VS_INTMATURE_NKI      | 172 | 0.441412 | 1.44914 | 0.0049505  | 0.127674 | 1 | 2700 tags=22%, list=17%, signal=26% | 0.383293  | 1.2806   | 0.035      | 0.311287  | 1     | 2718 tags=21%, list=17%, signal=25% |
| GSE32423_CTRL_VS_IL4_MEMORY_C1     | 175 | 0.436386 | 1.44821 | 0.00377834 | 0.128484 | 1 | 3308 tags=34%, list=21%, signal=42% | -0.253231 | -0.98424 | 0.471204   | 0.687245  | 1     | 2608 tags=23%, list=16%, signal=27% |
| CALCIUM_INDEPENDENT_CELL_CELL      | 20  | 0.598873 | 1.44753 | 0.0485893  | 0.128876 | 1 | 1088 tags=15%, list=7%, signal=16%  | 0.45867   | 1.07235  | 0.366987   | 0.619824  | 1     | 2515 tags=15%, list=16%, signal=18% |
| RESPONSE_TO_WOUNDING               | 173 | 0.437865 | 1.44741 | 0.00715137 | 0.128388 | 1 | 2958 tags=28%, list=18%, signal=34% | 0.391844  | 1.31953  | 0.0298137  | 0.268767  | 1     | 1805 tags=20%, list=11%, signal=23% |
| GSE15767_MED_VS_SCS_MAC_LN_UI      | 174 | 0.432642 | 1.44704 | 0.00739827 | 0.128285 | 1 | 3297 tags=34%, list=21%, signal=42% | -0.275535 | -1.057   | 0.242574   | 0.576651  | 1     | 1696 tags=22%, list=11%, signal=24% |
| GSE22886_NAIVE_BCELL_VS_BLOOD      | 183 | 0.43298  | 1.44499 | 0.00592417 | 0.130673 | 1 | 2923 tags=32%, list=18%, signal=38% | 0.497356  | 1.68603  | 0          | 0.0474051 | 0.736 | 2550 tags=34%, list=16%, signal=40% |
| EXTRACELLULAR_MATRIX_STRUCTURE     | 22  | 0.589043 | 1.44385 | 0.0059016  | 0.13163  | 1 | 2754 tags=27%, list=17%, signal=33% | -0.387276 | -1.025   | 0.37931    | 0.621022  | 1     | 3046 tags=27%, list=22%, signal=35% |
| RESPONSE_TO_STRESS                 | 467 | 0.407555 | 1.44289 | 0          | 0.132351 | 1 | 3468 tags=31%, list=22%, signal=39% | 0.354881  | 1.29283  | 0.00218103 | 0.296819  | 1     | 3250 tags=30%, list=20%, signal=36% |
| GSE3982_DC_VS_MAC_DN               | 173 | 0.434636 | 1.44208 | 0.00120048 | 0.132855 | 1 | 3086 tags=27%, list=19%, signal=33% | 0.410999  | 1.38587  | 0.00743494 | 0.197653  | 1     | 2575 tags=25%, list=16%, signal=30% |
| RHODOPHOSPHOLIPID_RECEPTOR_ACTIVIT | 124 | 0.44988  | 1.44168 | 0.00518807 | 0.132841 | 1 | 2320 tags=14%, list=14%, signal=16% | -0.289609 | -1.0604  | 0.288618   | 0.572072  | 1     | 694 tags=6%, list=4%, signal=7%     |
| GSE14000_4H_VS_16H_LPS_DC_TRAI     | 175 | 0.437415 | 1.44135 | 0.00477897 | 0.132725 | 1 | 3443 tags=43%, list=21%, signal=54% | 0.337284  | 1.13448  | 0.190416   | 0.517398  | 1     | 2959 tags=30%, list=18%, signal=36% |
| GSE22886_NAIVE_BCELL_VS_DC_DN      | 182 | 0.42715  | 1.44049 | 0.00480769 | 0.13326  | 1 | 3035 tags=37%, list=19%, signal=45% | 0.269349  | 0.916829 | 0.67866    | 0.832812  | 1     | 2967 tags=30%, list=18%, signal=37% |
| GSE14769_UNSTIM_VS_80MIN_LPS_I     | 174 | 0.433361 | 1.43964 | 0.00609013 | 0.133794 | 1 | 1992 tags=29%, list=12%, signal=33% | 0.292402  | 0.986648 | 0.488402   | 0.750629  | 1     | 2637 tags=22%, list=14%, signal=25% |
| CELL_MIGRATION                     | 87  | 0.471937 | 1.43962 | 0.0122449  | 0.133215 | 1 | 2918 tags=24%, list=18%, signal=29% | 0.415117  | 1.28641  | 0.0698324  | 0.307298  | 1     | 2190 tags=22%, list=14%, signal=25% |
| GSE30962_ACUTE_VS_CHRONIC_LCM      | 183 | 0.429272 | 1.43958 | 0.00242131 | 0.132636 | 1 | 3521 tags=41%, list=22%, signal=52% | 0.483436  | 1.62821  | 0          | 0.0676766 | 0.95  | 2016 tags=28%, list=13%, signal=32% |
| GSE15930_NAIVE_VS_72H_IN_VITRO     | 182 | 0.427293 | 1.43918 | 0.00243902 | 0.132684 | 1 | 3299 tags=37%, list=21%, signal=46% | 0.40535   | 1.36403  | 0.0146341  | 0.221314  | 1     | 2675 tags=32%, list=17%, signal=38% |
| ION_TRANSMEMBRANE_TRANSPORT        | 240 | 0.420189 | 1.43878 | 0          | 0.132617 | 1 | 3119 tags=23%, list=19%, signal=28% | 0.338975  | 1.1844   | 0.111372   | 0.446229  | 1     | 2840 tags=18%, list=18%, signal=21% |
| GSE17974_CTRL_VS_ACT_IL4_AND_A     | 171 | 0.431821 | 1.43819 | 0.00990099 | 0.132784 | 1 | 2875 tags=35%, list=18%, signal=42% | -0.268913 | -1.05371 | 0.309524   | 0.579591  | 1     | 2221 tags=22%, list=14%, signal=26% |
| GSE10239_NAIVE_VS_KLRG1HIGH_EF     | 183 | 0.431874 | 1.43665 | 0.00478469 | 0.134425 | 1 | 3213 tags=38%, list=20%, signal=47% | 0.479194  | 1.62331  | 0          | 0.064242  | 0.957 | 3341 tags=39%, list=21%, signal=49% |
| BASOLATERAL_PLASMA_MEMBRANE        | 30  | 0.555637 | 1.43603 | 0.0352761  | 0.134641 | 1 | 3103 tags=43%, list=19%, signal=54% | 0.391781  | 1.00569  | 0.441935   | 0.734562  | 1     | 2194 tags=17%, list=14%, signal=19% |
| GENERATION_OF_NEURONS              | 75  | 0.47633  | 1.43453 | 0.0205198  | 0.13622  | 1 | 1041 tags=15%, list=6%, signal=16%  | 0.364897  | 1.11348  | 0.253541   | 0.546061  | 1     | 937 tags=9%, list=6%, signal=10%    |
| CHROMOSOME_SEGREGATION             | 28  | 0.561912 | 1.43446 | 0.0531915  | 0.135704 | 1 | 3521 tags=50%, list=22%, signal=64% | 0.501759  | 1.28998  | 0.139937   | 0.302355  | 1     | 2412 tags=43%, list=15              |

Supplementary Table 3. Gene enrichment statistics for HD and control monkeys.

4

|                                 |     |          |         |            |          |   |                                     |           |           |            |            |       |                                     |
|---------------------------------|-----|----------|---------|------------|----------|---|-------------------------------------|-----------|-----------|------------|------------|-------|-------------------------------------|
| MITOTIC_CELL_CYCLE              | 139 | 0.441806 | 1.42562 | 0.00388098 | 0.139358 | 1 | 2967 tags=37%, list=18%, signal=45% | 0.446435  | 1.48953   | 0.00258398 | 0.136174   | 1     | 3068 tags=41%, list=19%, signal=50% |
| GSE20715_OH_VS_GH_OZONE_LUNG    | 175 | 0.432212 | 1.42553 | 0          | 0.138915 | 1 | 2617 tags=25%, list=16%, signal=30% | 0.349865  | 1.17528   | 0.140199   | 0.453652   | 1     | 3491 tags=31%, list=22%, signal=40% |
| GSE30962_PRIMARY_VS_SECONDARY   | 166 | 0.431061 | 1.42414 | 0.00853659 | 0.140608 | 1 | 2062 tags=23%, list=13%, signal=26% | -0.249158 | -0.950325 | 0.641414   | 0.767016   | 1     | 1740 tags=16%, list=11%, signal=17% |
| GSE17721_CPG_VS_GARDIQUIMOD_I   | 174 | 0.428312 | 1.42274 | 0.00490798 | 0.142156 | 1 | 2586 tags=30%, list=16%, signal=35% | 0.293622  | 0.991381  | 0.489621   | 0.749648   | 1     | 3187 tags=27%, list=20%, signal=33% |
| GSE22886_UNSTIM_VS_IL2_STIM_NK  | 187 | 0.422836 | 1.42246 | 0.00837321 | 0.142    | 1 | 3285 tags=36%, list=20%, signal=45% | 0.558131  | 1.88577   | 0          | 0.00351033 | 0.042 | 2517 tags=44%, list=16%, signal=51% |
| GSE339_EX_VIVO_VS_IN_CULTURE_C  | 181 | 0.42426  | 1.42119 | 0.00487805 | 0.143389 | 1 | 3294 tags=34%, list=21%, signal=42% | 0.401281  | 1.35122   | 0.0136646  | 0.239572   | 1     | 3240 tags=29%, list=20%, signal=36% |
| ACTIN_POLYMERIZATION_AND_OR_D   | 20  | 0.60716  | 1.41989 | 0.0537816  | 0.145006 | 1 | 1152 tags=35%, list=7%, signal=38%  | 0.336142  | 0.824096  | 0.377705   | 0.932217   | 1     | 1496 tags=20%, list=9%, signal=22%  |
| GSE24142_DN2_VS_DN3_THYMOCYT    | 186 | 0.424727 | 1.4184  | 0.00238949 | 0.146639 | 1 | 2072 tags=27%, list=13%, signal=31% | 0.355501  | 1.20235   | 0.0869565  | 0.427844   | 1     | 3290 tags=32%, list=20%, signal=40% |
| GSE3982_DC_VS_TH1_UP            | 172 | 0.43128  | 1.41813 | 0.00743494 | 0.146455 | 1 | 2659 tags=30%, list=17%, signal=35% | 0.302184  | 1.01182   | 0.348424   | 0.726471   | 1     | 2865 tags=28%, list=18%, signal=34% |
| GSE7852_TREG_VS_TCONV_UP        | 181 | 0.427907 | 1.41744 | 0.00371747 | 0.146819 | 1 | 2907 tags=34%, list=18%, signal=41% | 0.274044  | 0.928247  | 0.644068   | 0.81493    | 1     | 3423 tags=33%, list=21%, signal=42% |
| REGULATION_OF_PROTEIN_STABILITY | 17  | 0.624026 | 1.41637 | 0.0623946  | 0.147963 | 1 | 3106 tags=53%, list=19%, signal=66% | 0.511645  | 1.18205   | 0.248773   | 0.448872   | 1     | 3418 tags=35%, list=21%, signal=45% |
| GSE24142_EARLY_THYMIC_PROGENI   | 183 | 0.422574 | 1.41625 | 0.00710059 | 0.147528 | 1 | 2681 tags=30%, list=17%, signal=35% | -0.260215 | -1.00557  | 0.39196    | 0.642128   | 1     | 2534 tags=25%, list=16%, signal=30% |
| SENSORY_PERCEPTION_OF_CHEMICA   | 19  | 0.60273  | 1.41422 | 0.0544     | 0.149959 | 1 | 1807 tags=16%, list=11%, signal=18% | -0.368585 | -0.935746 | 0.536585   | 0.788787   | 1     | 1696 tags=11%, list=11%, signal=12% |
| GSE14350_IL2R8_KO_VS_WT_TEFF_D  | 177 | 0.427303 | 1.41399 | 0.0059312  | 0.149769 | 1 | 2934 tags=33%, list=18%, signal=40% | 0.278858  | 0.93867   | 0.615385   | 0.800989   | 1     | 1877 tags=18%, list=12%, signal=20% |
| GSE17721_0.5H_VS_24H_PAM3CSK4   | 183 | 0.421978 | 1.41369 | 0.00484261 | 0.149674 | 1 | 3387 tags=37%, list=21%, signal=46% | 0.338085  | 1.14877   | 0.15679    | 0.494127   | 1     | 3038 tags=31%, list=19%, signal=37% |
| GSE17721_CTRL_VS_POLYIC_24H_BV  | 172 | 0.425048 | 1.4136  | 0.00744417 | 0.149185 | 1 | 3145 tags=31%, list=20%, signal=39% | 0.233193  | 0.787323  | 0.961202   | 0.966019   | 1     | 3457 tags=25%, list=22%, signal=32% |
| NEGATIVE_REGULATION_OF_CELLUL   | 28  | 0.556865 | 1.41288 | 0.0548861  | 0.149674 | 1 | 2066 tags=29%, list=13%, signal=33% | 0.613294  | 1.57554   | 0.00596125 | 0.0839738  | 0.997 | 2711 tags=36%, list=17%, signal=43% |
| GSE3982_EOSINOPHIL_VS_CENT_MEI  | 170 | 0.421046 | 1.41254 | 0.00609756 | 0.149584 | 1 | 3468 tags=40%, list=22%, signal=50% | 0.327719  | 1.10318   | 0.125539   | 0.555329   | 1     | 4007 tags=38%, list=25%, signal=50% |
| GSE9037_CTRL_VS_LPS_4H_STIM_BV  | 182 | 0.423148 | 1.41121 | 0.00959233 | 0.151156 | 1 | 2842 tags=32%, list=18%, signal=38% | -0.310987 | -1.20343  | 0.026738   | 0.426599   | 1     | 2952 tags=32%, list=18%, signal=39% |
| M_PHASE                         | 101 | 0.452463 | 1.41039 | 0.0156454  | 0.151907 | 1 | 2967 tags=36%, list=18%, signal=43% | 0.46363   | 1.47724   | 0.0082531  | 0.138653   | 1     | 3068 tags=43%, list=19%, signal=52% |
| CELL_SUBSTRATE_ADHESION         | 35  | 0.529455 | 1.40901 | 0.0455259  | 0.153465 | 1 | 2963 tags=40%, list=18%, signal=49% | 0.483772  | 1.31427   | 0.0876369  | 0.271581   | 1     | 2723 tags=29%, list=17%, signal=34% |
| GSE17580_TREG_VS_TEFF_S_MANSO   | 179 | 0.422116 | 1.40808 | 0.00118765 | 0.154427 | 1 | 3540 tags=37%, list=22%, signal=47% | 0.309258  | 1.03514   | 0.3825     | 0.690859   | 1     | 2881 tags=26%, list=18%, signal=31% |
| GSE10463_CD40L_AND_VA347_VS_C   | 161 | 0.4265   | 1.40674 | 0.0123457  | 0.156019 | 1 | 3786 tags=34%, list=24%, signal=44% | -0.230419 | -0.881398 | 0.889297   | 0.903518   | 1     | 2675 tags=20%, list=17%, signal=24% |
| GSE7460_CD8_TCELL_VS_CD4_TCELL  | 170 | 0.428136 | 1.40663 | 0.00621118 | 0.155607 | 1 | 2222 tags=28%, list=14%, signal=32% | 0.289972  | 0.967908  | 0.545906   | 0.776353   | 1     | 3405 tags=31%, list=21%, signal=39% |
| REGULATION_OF_RAS_PROTEIN_SIG   | 17  | 0.617679 | 1.40625 | 0.0527183  | 0.155596 | 1 | 2366 tags=35%, list=15%, signal=41% | 0.408527  | 0.937417  | 0.545798   | 0.801554   | 1     | 2451 tags=35%, list=15%, signal=42% |
| GSE3982_EOSINOPHIL_VS_EFF_MEM   | 170 | 0.423277 | 1.40393 | 0.00837321 | 0.158831 | 1 | 3413 tags=35%, list=21%, signal=44% | 0.282003  | 0.950806  | 0.61227    | 0.786771   | 1     | 3038 tags=29%, list=19%, signal=35% |
| GSE1432_CTRL_VS_IFNG_24H_MICR   | 178 | 0.423095 | 1.40391 | 0.00616523 | 0.158274 | 1 | 2436 tags=26%, list=15%, signal=31% | -0.251825 | -0.973261 | 0.527864   | 0.713695   | 1     | 1806 tags=26%, list=11%, signal=23% |
| GSE24142_EARLY_THYMIC_PROGENI   | 183 | 0.423605 | 1.4039  | 0.00612745 | 0.157694 | 1 | 3097 tags=31%, list=19%, signal=38% | 0.414708  | 1.40342   | 0.00501882 | 0.188961   | 1     | 2829 tags=30%, list=18%, signal=35% |
| GSE27786_LSK_VS_CD8_TCELL_DN    | 173 | 0.425791 | 1.40305 | 0.00982801 | 0.158638 | 1 | 3866 tags=35%, list=24%, signal=46% | -0.301059 | -1.14573  | 0.0869565  | 0.470512   | 1     | 2601 tags=25%, list=16%, signal=30% |
| GSE22886_IGG_IGA_MEMORY_BCELL   | 179 | 0.420199 | 1.40139 | 0.00363636 | 0.16086  | 1 | 3378 tags=35%, list=21%, signal=44% | 0.48525   | 1.6389    | 0          | 0.0663231  | 0.922 | 2263 tags=33%, list=14%, signal=38% |
| GSE29618_MONOCYTE_VS_PDC_DAY    | 168 | 0.423991 | 1.40137 | 0.00609013 | 0.160316 | 1 | 3425 tags=38%, list=21%, signal=48% | 0.407681  | 1.38257   | 0.0112219  | 0.202635   | 1     | 2533 tags=31%, list=16%, signal=36% |
| CELL_JUNCTION                   | 74  | 0.471985 | 1.40123 | 0.0212465  | 0.159981 | 1 | 3103 tags=26%, list=19%, signal=32% | 0.138187  | 1.16126   | 0.639468   | 0.481175   | 1     | 2875 tags=18%, list=18%, signal=21% |
| MEMBRANE_ORGANIZATION_AND_B     | 121 | 0.437684 | 1.40084 | 0.0115681  | 0.160047 | 1 | 1987 tags=21%, list=12%, signal=23% | 0.464023  | 1.5072    | 0.00132275 | 0.125011   | 1     | 2443 tags=28%, list=15%, signal=33% |
| CYTOSKELETAL_PART               | 210 | 0.412996 | 1.39942 | 0.00356295 | 0.161855 | 1 | 3612 tags=35%, list=23%, signal=45% | 0.415913  | 1.43351   | 0.00361011 | 0.160877   | 1     | 2572 tags=26%, list=16%, signal=30% |
| GSE32423_CTRL_VS_IL7_IL4_MEMO   | 177 | 0.422559 | 1.39874 | 0.00241838 | 0.162372 | 1 | 3287 tags=32%, list=20%, signal=39% | -0.333623 | -1.29416  | 0.0215054  | 0.344939   | 1     | 2529 tags=32%, list=16%, signal=37% |
| I_KAPPAB_KINASE_NF_KAPPAB_CASC  | 100 | 0.450127 | 1.39872 | 0.0199468  | 0.161825 | 1 | 3317 tags=41%, list=21%, signal=51% | 0.41678   | 1.33767   | 0.0395634  | 0.253421   | 1     | 3754 tags=48%, list=23%, signal=62% |
| GSE9650_EFFECTOR_VS_MEMORY_CI   | 182 | 0.422914 | 1.39861 | 0.0071599  | 0.161408 | 1 | 3221 tags=34%, list=20%, signal=41% | 0.399076  | 1.35331   | 0.017094   | 0.238069   | 1     | 1738 tags=23%, list=11%, signal=26% |
| INORGANIC_ANION_TRANSMEMBR      | 16  | 0.6119   | 1.39767 | 0.0767918  | 0.162477 | 1 | 3068 tags=44%, list=19%, signal=54% | 0.359687  | 0.807099  | 0.741056   | 0.949421   | 1     | 2693 tags=25%, list=17%, signal=30% |
| GSE31082_DP_VS_CD8_SP_THYMOCY   | 175 | 0.418778 | 1.39732 | 0.00837321 | 0.168983 | 1 | 2925 tags=33%, list=18%, signal=39% | 0.285721  | 0.960575  | 0.560248   | 0.774953   | 1     | 2161 tags=20%, list=13%, signal=23% |
| GSE17721_0.5H_VS_8H_PAM3CSK4_I  | 175 | 0.419759 | 1.39243 | 0.0111801  | 0.170611 | 1 | 3217 tags=34%, list=20%, signal=42% | 0.276573  | 0.929764  | 0.638191   | 0.811338   | 1     | 2496 tags=21%, list=16%, signal=24% |
| GSE7852_THYMUS_VS_FAT_TREG_DN   | 171 | 0.419098 | 1.39214 | 0.0142857  | 0.17052  | 1 | 2952 tags=29%, list=18%, signal=35% | 0.406294  | 1.36319   | 0.0149813  | 0.222398   | 1     | 2645 tags=27%, list=16%, signal=32% |
| DNA_REPLICATION                 | 91  | 0.451918 | 1.39182 | 0.0223664  | 0.170535 | 1 | 3129 tags=33%, list=19%, signal=41% | 0.410835  | 1.27736   | 0.0913979  | 0.314693   | 1     | 2237 tags=30%, list=14%, signal=34% |
| GSE27786_CD4_TCELL_VS_MONO_M    | 169 | 0.423558 | 1.39155 | 0.00732601 | 0.17048  | 1 | 3677 tags=36%, list=23%, signal=46% | 0.351817  | 1.18903   | 0.113553   | 0.440387   | 1     | 3625 tags=32%, list=23%, signal=41% |
| GSE1460_NAIVE_CD4_TCELL_ADULT   | 184 | 0.418839 | 1.3914  | 0.00609013 | 0.170145 | 1 | 3403 tags=33%, list=21%, signal=42% | 0.360922  | 1.21463   | 0.0774908  | 0.412709   | 1     | 2303 tags=23%, list=14%, signal=26% |
| MEIOTIC_CELL_CYCLE              | 32  | 0.531184 | 1.39088 | 0.060241   | 0.170546 | 1 | 1077 tags=19%, list=7%, signal=20%  | 0.328859  | 0.862115  | 0.691718   | 0.898645   | 1     | 2011 tags=25%, list=13%, signal=29% |
| GSE3982_MAC_VS_BCELL_UP         | 181 | 0.416215 | 1.3906  | 0.011194   | 0.170423 | 1 | 3770 tags=41%, list=23%, signal=53% | 0.294592  | 0.986689  | 0.515151   | 0.751443   | 1     | 2551 tags=22%, list=16%, signal=25% |
| GSE24142_ADULT_VS_FETAL_DN3_T   | 178 | 0.415426 | 1.39025 | 0.00858896 | 0.170414 | 1 | 2143 tags=26%, list=13%, signal=29% | 0.250802  | 0.851285  | 0.823529   | 0.907051   | 1     | 2923 tags=26%, list=18%, signal=31% |
| KAECN_DAY8_EFF_VS_DAY15_EFF_CC  | 182 | 0.420029 | 1.3902  | 0.0121212  | 0.169915 | 1 | 2451 tags=23%, list=15%, signal=27% | 0.437747  | 1.4782    | 0.00249377 | 0.138527   | 1     | 1659 tags=21%, list=10%, signal=23% |
| GSE360_L_DONOVANI_VS_B_MALAYI   | 181 | 0.420211 | 1.39017 | 0.00734394 | 0.169389 | 1 | 3404 tags=31%, list=21%, signal=40% | 0.395632  | 1.34779   | 0.0159509  | 0.243632   | 1     | 2474 tags=24%, list=15%, signal=28% |
| CELLULAR_MORPHOGENESIS_DURIN    | 43  | 0.503297 | 1.38997 | 0.0517504  | 0.169125 | 1 | 766 tags=14%, list=5%, signal=15%   | 0.355572  | 0.990343  | 0.465649   | 0.749832   | 1     | 937 tags=9%, list=6%, signal=10%    |
| INORGANIC_CATION_TRANSMEMBR     | 51  | 0.488721 | 1.38968 | 0.0417266  | 0.169006 | 1 | 2871 tags=31%, list=18%, signal=38% | 0.411092  | 1.16859   | 0.203488   | 0.468148   | 1     | 2117 tags=22%, list=13%, signal=25% |
| TIGHT_JUNCTION                  | 27  | 0.548194 | 1.38945 | 0.0586319  | 0.168854 | 1 | 1088 tags=15%, list=7%, signal=16%  | 0.320623  | 0.818029  | 0.735623   | 0.939379   | 1     | 2875 tags=15%, list=18%, signal=18% |
| POSITIVE_REGULATION_OF_PROTEIN  | 28  | 0.545067 | 1.38874 | 0.0685358  | 0.169489 | 1 | 3356 tags=39%, list=21%, signal=50% | 0.537381  | 1.3773    | 0.070626   | 0.209143   | 1     | 2701 tags=39%, list=17%, signal=47% |
| GSE3982_EOSINOPHIL_VS_BCELL_UP  | 173 | 0.419617 | 1.38857 | 0.0136986  | 0.16927  | 1 | 3218 tags=30%, list=20%, signal=37% | 0.254356  | 0.85419   | 0.821293   | 0.90531    | 1     | 3722 tags=26%, list=23%, signal=33% |
| GSE26928_NAIVE_VS_CXCR5_POS_CC  | 160 | 0.419458 | 1.38813 | 0.0136816  | 0.169494 | 1 | 2675 tags=28%, list=17%, signal=33% | 0.342586  | 1.15079   | 0.169788   | 0.491663   | 1     | 3940 tags=35%, list=25%, signal=46% |
| REGULATION_OF_I_KAPPAB_KINASE   | 85  | 0.455336 | 1.38792 | 0.0421196  | 0.169243 | 1 | 2630 tags=34%, list=16%, signal=41% | 0.422424  | 1.31387   | 0.0488506  | 0.271793   | 1     | 3916 tags=53%, list=24%, signal=70% |
| ENZYME_ACTIVATOR_ACTIVITY       | 115 | 0.435671 | 1.38629 | 0.0219072  | 0.171776 | 1 | 1303 tags=17%, list=8%, signal=18%  | 0.313683  | 1.01264   | 0.43879    | 0.727278   | 1     | 3729 tags=30%, list=23%, signal=38% |
| GSE11864_CSF1_IFNG_VS_CSF1_PAM  | 155 | 0.422252 | 1.38616 | 0.00864197 | 0.171453 | 1 | 2827 tags=32%, list=18%, signal=39% | 0.298187  | 1.00147   | 0.459873   | 0.741247   | 1     | 2527 tags=23%, list=16%, signal=27% |
| ION_TRANSPORT                   | 161 | 0.417873 | 1.38613 | 0.00741656 | 0.17091  | 1 | 4198 tags=33%, list=26%, signal=44% | 0.368268  | 1.24454   | 0.0729834  | 0.367723   | 1     | 4191 tags=27%, list=26%, signal=37% |
| GSE29618_PRE_VS_DAY7_POST_LAIV  | 169 | 0.418588 | 1.38553 | 0.00739827 | 0.171401 | 1 | 2878 tags=28%, list=18%, signal=34% | 0.393071  | 1.32997   | 0.0195599  | 0.262297   | 1     | 3628 tags=30%, list=23%, signal=38% |
| REGULATION_OF_CELL_CYCLE        | 163 | 0.419121 | 1.3831  | 0.0111111  | 0.175139 | 1 | 3003 tags=34%, list=19%, signal=41% | 0.397918  | 1.32809   | 0.02625    | 0.264758   | 1     | 2586 tags=28%, list=16%, signal=33% |
| GSE1460_CD4_THYMOCYTE_VS_THM    | 173 | 0.411936 | 1.38239 | 0.0124378  | 0.175787 | 1 | 3398 tags=32%, list=21%, signal=40% | 0.347537  | 1.17663   | 0.11677    | 0.4553     | 1     | 4066 tags=38%, list=25%, signal=51% |
| GSE22886_CD4_TCELL_VS_BCELL_NA  | 159 | 0.42193  | 1.38207 | 0.0173267  | 0.175769 | 1 | 1630 tags=21%, list=10%, signal=24% | 0.331704  | 1.10709   | 0.230573   | 0.555255   | 1     | 3454 tags=34%, list=22%, signal=44% |
| GSE17721_0.5H_VS_24H_LPS_BMDM   | 176 | 0.418075 | 1.38136 | 0.0138889  | 0.176527 | 1 | 2316 tags=25%, list=14%, signal=29% | 0.410351  | 1.37215   | 0.0123305  | 0.215046   | 1     | 2303 tags=24%, list=14%, signal=28% |
|                                 |     |          |         |            |          |   |                                     |           |           |            |            |       |                                     |

Supplementary Table 3. Gene enrichment statistics for HD and control monkeys.

5

|                                                     |     |          |         |            |          |   |                                     |           |           |            |          |   |                                     |
|-----------------------------------------------------|-----|----------|---------|------------|----------|---|-------------------------------------|-----------|-----------|------------|----------|---|-------------------------------------|
| GSE360_L_MAJOR_VS_B_MALAYI_HI                       | 172 | 0.41195  | 1.37357 | 0.00968523 | 0.181008 | 1 | 3153 tags=26%, list=20%, signal=31% | 0.320482  | 1.08087   | 0.273885   | 0.602399 | 1 | 2203 tags=17%, list=14%, signal=19% |
| GSE17721_LPS_VS_CPG_16H_BMDM                        | 176 | 0.413309 | 1.3725  | 0.00966184 | 0.18251  | 1 | 2536 tags=24%, list=16%, signal=28% | 0.389377  | 1.3113    | 0.0281174  | 0.275704 | 1 | 2887 tags=28%, list=18%, signal=34% |
| MOLECULAR_ADAPTOR_ACTIVITY                          | 46  | 0.490323 | 1.37223 | 0.054755   | 0.182428 | 1 | 2792 tags=39%, list=17%, signal=47% | 0.443883  | 1.24542   | 0.135258   | 0.36561  | 1 | 2362 tags=33%, list=15%, signal=38% |
| PHOSPHORIC_DIESTER_HYDROLASE_I                      | 38  | 0.504482 | 1.37214 | 0.0590909  | 0.182055 | 1 | 871 tags=18%, list=5%, signal=19%   | 0.401018  | 1.10109   | 0.293853   | 0.559904 | 1 | 3722 tags=37%, list=23%, signal=48% |
| GSE22045_TREG_VS_TCONV_UP                           | 146 | 0.420584 | 1.37139 | 0.0191571  | 0.182868 | 1 | 2596 tags=25%, list=16%, signal=30% | 0.371902  | 1.23969   | 0.0722433  | 0.377184 | 1 | 2275 tags=21%, list=14%, signal=25% |
| GSE37416_OH_VS_48H_F_TULARENSI                      | 169 | 0.412481 | 1.37084 | 0.0151707  | 0.183366 | 1 | 3344 tags=40%, list=21%, signal=50% | -0.245904 | -0.936544 | 0.665049   | 0.788158 | 1 | 3034 tags=32%, list=19%, signal=39% |
| GSE17721_CTRL_VS_LPS_0.5H_BMDM                      | 170 | 0.411306 | 1.37078 | 0.0160296  | 0.18289  | 1 | 2987 tags=29%, list=19%, signal=36% | 0.386023  | 1.306254  | 0.0352645  | 0.283788 | 1 | 2473 tags=24%, list=15%, signal=28% |
| GSE29618_MONOCYTE_VS_PDC_UP                         | 167 | 0.413866 | 1.36916 | 0.00623441 | 0.183539 | 1 | 2446 tags=32%, list=15%, signal=38% | -0.343102 | -1.29778  | 0.0105263  | 0.34876  | 1 | 2010 tags=28%, list=13%, signal=31% |
| GSE15324_NAIVE_VS_ACTIVATED_CD                      | 180 | 0.40994  | 1.36911 | 0.00828402 | 0.18489  | 1 | 2746 tags=30%, list=17%, signal=36% | 0.35478   | 1.20523   | 0.109276   | 0.423926 | 1 | 3368 tags=33%, list=21%, signal=41% |
| GSE360_HIGH_VS_LOW_DOSE_B_MA                        | 176 | 0.409931 | 1.3682  | 0.00828402 | 0.18615  | 1 | 2404 tags=24%, list=15%, signal=28% | 0.284191  | 0.956359  | 0.583851   | 0.778889 | 1 | 2516 tags=29%, list=16%, signal=36% |
| GSE26928_NAIVE_VS_EFF_MEMORY                        | 160 | 0.412445 | 1.36618 | 0.00746269 | 0.189605 | 1 | 2808 tags=31%, list=17%, signal=37% | 0.405486  | 1.34978   | 0.0164557  | 0.240632 | 1 | 3221 tags=29%, list=20%, signal=23% |
| GSE17721_CTRL_VS_POLYVIC_0.5H_BA                    | 171 | 0.411715 | 1.36614 | 0.0125156  | 0.189134 | 1 | 3085 tags=30%, list=19%, signal=37% | 0.38845   | 1.31132   | 0.0258303  | 0.276462 | 1 | 2473 tags=26%, list=15%, signal=31% |
| GSE7460_CTRL_VS_TGFB_TREATED_A                      | 168 | 0.408343 | 1.36612 | 0.0101138  | 0.188584 | 1 | 3090 tags=33%, list=19%, signal=40% | -0.366678 | -1.38299  | 0.015544   | 0.293068 | 1 | 1982 tags=24%, list=12%, signal=27% |
| GSE17721_0.5H_VS_4H_LPS_BMDM_CELL_SURFACE           | 175 | 0.411446 | 1.36609 | 0.00596659 | 0.188051 | 1 | 3295 tags=32%, list=21%, signal=40% | 0.253558  | 0.850753  | 0.844913   | 0.906873 | 1 | 2073 tags=13%, list=13%, signal=15% |
| PHOSPHOPROTEIN_PHOSPHATASE_Ai                       | 69  | 0.454365 | 1.36527 | 0.0564175  | 0.188648 | 1 | 2366 tags=23%, list=15%, signal=27% | 0.485554  | 1.43782   | 0.0168539  | 0.161405 | 1 | 3118 tags=31%, list=19%, signal=39% |
| GSE3982_DC_VS_MAC_LPS_STIM_DM                       | 168 | 0.415066 | 1.36514 | 0.0111801  | 0.188262 | 1 | 2256 tags=33%, list=14%, signal=39% | -0.230132 | -0.773277 | 0.95189    | 0.995078 | 1 | 2221 tags=19%, list=14%, signal=22% |
| KAECH_NAIVE_VS_DAY8_EFF_CD8_TC                      | 181 | 0.409415 | 1.36493 | 0.0156062  | 0.188129 | 1 | 3273 tags=32%, list=20%, signal=40% | 0.419816  | 1.40906   | 0.00607566 | 0.182335 | 1 | 1520 tags=19%, list=9%, signal=21%  |
| GSE26928_EFF_MEM_VS_CENTR_ME                        | 143 | 0.422433 | 1.36367 | 0.0164766  | 0.19003  | 1 | 2970 tags=31%, list=19%, signal=38% | 0.427653  | 1.45411   | 0.00125623 | 0.150673 | 1 | 2401 tags=29%, list=15%, signal=34% |
| MICROTUBULE_CYTOSKELETON                            | 133 | 0.421488 | 1.36282 | 0.0236613  | 0.191145 | 1 | 2577 tags=24%, list=16%, signal=28% | 0.469775  | 1.55827   | 0.00126743 | 0.096753 | 1 | 3005 tags=36%, list=19%, signal=44% |
| GSE12366_NAIVE_VS_MEMORY_BCEI                       | 166 | 0.409756 | 1.36264 | 0.0134474  | 0.190974 | 1 | 3521 tags=38%, list=22%, signal=49% | 0.452192  | 1.48197   | 0.00518135 | 0.137539 | 1 | 2569 tags=30%, list=16%, signal=36% |
| GSE11864_CSF1_IFNG_VS_CSF1_IFNC                     | 166 | 0.413475 | 1.36207 | 0.0168269  | 0.191618 | 1 | 2455 tags=31%, list=15%, signal=36% | -0.27532  | -1.05203  | 0.306977   | 0.577745 | 1 | 2193 tags=25%, list=14%, signal=28% |
| GSE17721_PAM3CSK4_VS_GADIQUIM                       | 180 | 0.409621 | 1.3619  | 0.0133172  | 0.191466 | 1 | 3228 tags=34%, list=20%, signal=43% | 0.298129  | 0.993075  | 0.494238   | 0.750625 | 1 | 4031 tags=34%, list=25%, signal=45% |
| REGULATION_OF_SMALL_GTPASE_MI                       | 19  | 0.574704 | 1.36169 | 0.0981997  | 0.19137  | 1 | 2975 tags=33%, list=19%, signal=40% | -0.261739 | -1.01823  | 0.353591   | 0.624238 | 1 | 2663 tags=27%, list=17%, signal=32% |
| GSE9988_ANTI_TREM1_VS_VEHICLE_EMBRYONIC_DEVELOPMENT | 165 | 0.411899 | 1.36143 | 0.0217918  | 0.191233 | 1 | 1364 tags=26%, list=8%, signal=29%  | 0.407289  | 0.964364  | 0.486971   | 0.774018 | 1 | 3809 tags=47%, list=24%, signal=62% |
| PHOSPHORIC_ESTER_HYDROLASE_AC                       | 134 | 0.420565 | 1.36041 | 0.0215736  | 0.191244 | 1 | 1997 tags=24%, list=12%, signal=27% | 0.361479  | 1.21252   | 0.0925222  | 0.414445 | 1 | 3443 tags=34%, list=21%, signal=43% |
| SUBSTRATE_SPECIFIC_TRANSMEMBR                       | 303 | 0.392009 | 1.35954 | 0.00340909 | 0.193113 | 1 | 2502 tags=20%, list=16%, signal=24% | 0.422223  | 1.23413   | 0.133041   | 0.380589 | 1 | 3235 tags=24%, list=20%, signal=30% |
| GSE360_L_DONOVANI_VS_M_TUBERI                       | 169 | 0.413218 | 1.35818 | 0.0184957  | 0.195155 | 1 | 2256 tags=25%, list=14%, signal=29% | 0.293804  | 0.964827  | 0.557841   | 0.772987 | 1 | 3904 tags=31%, list=24%, signal=40% |
| GSE27786_NKCELL_VS_NKTCCELL_UP                      | 175 | 0.4085   | 1.35775 | 0.0109223  | 0.195409 | 1 | 2871 tags=22%, list=18%, signal=26% | 0.312856  | 1.10688   | 0.19515    | 0.554899 | 1 | 2840 tags=17%, list=18%, signal=20% |
| EXTRINSIC_TO_MEMBRANE                               | 20  | 0.574117 | 1.35762 | 0.0977199  | 0.195133 | 1 | 3337 tags=32%, list=21%, signal=40% | 0.42996   | 1.44137   | 0.00124533 | 0.158555 | 1 | 3229 tags=34%, list=20%, signal=42% |
| GSE3982_DC_VS_CENT_MEMORY_CD                        | 178 | 0.405045 | 1.35725 | 0.0183824  | 0.195265 | 1 | 3485 tags=38%, list=22%, signal=48% | 0.345902  | 1.16912   | 0.128916   | 0.467637 | 1 | 3139 tags=33%, list=20%, signal=40% |
| GSE3982_MAC_VS_CENT_MEMORY_I                        | 178 | 0.408698 | 1.35714 | 0.00991326 | 0.194929 | 1 | 3772 tags=40%, list=23%, signal=52% | 0.389429  | 0.927365  | 0.545514   | 0.816688 | 1 | 3389 tags=35%, list=21%, signal=44% |
| PROTEOGLYCAN_METABOLIC_PROC                         | 18  | 0.583347 | 1.35644 | 0.0880503  | 0.195842 | 1 | 3062 tags=33%, list=19%, signal=41% | 0.417838  | 1.41465   | 0.00614251 | 0.175564 | 1 | 3977 tags=47%, list=25%, signal=61% |
| GSE1460_DP_THYMOCTE_VS_NAIVE                        | 185 | 0.402107 | 1.35562 | 0.00985222 | 0.196785 | 1 | 4352 tags=44%, list=27%, signal=60% | 0.373165  | 1.26318   | 0.0441919  | 0.341404 | 1 | 2532 tags=27%, list=16%, signal=32% |
| GSE2826_WT_VS_TREM1_KCCELL_DN                       | 177 | 0.407458 | 1.35475 | 0.0136307  | 0.197987 | 1 | 3178 tags=39%, list=20%, signal=48% | -0.345969 | -0.880999 | 0.634204   | 0.902819 | 1 | 1740 tags=22%, list=11%, signal=25% |
| ACTIN_CYTOSKELETON                                  | 119 | 0.421475 | 1.35455 | 0.0287958  | 0.19779  | 1 | 2875 tags=31%, list=18%, signal=38% | 0.43268   | 1.46021   | 0.00375469 | 0.145043 | 1 | 2611 tags=34%, list=16%, signal=40% |
| GSE14000_4H_VS_16H_LPS_DC_UP                        | 166 | 0.406619 | 1.35416 | 0.0158924  | 0.197969 | 1 | 3079 tags=28%, list=19%, signal=35% | 0.339679  | 1.13868   | 0.339679   | 0.512459 | 1 | 2876 tags=24%, list=18%, signal=29% |
| GSE25087_FETAL_VS_ADULT_TCONV                       | 179 | 0.407054 | 1.35324 | 0.0205314  | 0.199284 | 1 | 3425 tags=29%, list=21%, signal=37% | 0.364556  | 1.18229   | 0.141161   | 0.448664 | 1 | 2944 tags=27%, list=18%, signal=33% |
| INTERCELLULAR_JUNCTION                              | 58  | 0.468328 | 1.35323 | 0.0429429  | 0.198744 | 1 | 3420 tags=36%, list=21%, signal=45% | 0.308217  | 1.10426   | 0.363402   | 0.681319 | 1 | 2855 tags=28%, list=18%, signal=33% |
| REGULATION_OF_CATALYTIC_ACTIVIT                     | 252 | 0.391217 | 1.35263 | 0.0162413  | 0.199378 | 1 | 2629 tags=28%, list=16%, signal=34% | 0.356863  | 1.2163    | 0.0919118  | 0.416949 | 1 | 3173 tags=32%, list=20%, signal=40% |
| GSE17721_CPG_VS_GARDIQUIMOD_I                       | 177 | 0.410217 | 1.35257 | 0.0145808  | 0.19897  | 1 | 1755 tags=17%, list=11%, signal=19% | 0.360434  | 1.07005   | 0.33864    | 0.625434 | 1 | 2875 tags=19%, list=18%, signal=23% |
| GSE39820_CTRL_VS_TGFBETA3_IL6_I                     | 187 | 0.402129 | 1.3517  | 0.0168878  | 0.200205 | 1 | 3351 tags=29%, list=21%, signal=37% | 0.306405  | 1.06935   | 0.290323   | 0.625426 | 1 | 2586 tags=21%, list=16%, signal=25% |
| DNA_REPLICATION_INITIATION                          | 15  | 0.600288 | 1.35166 | 0.125212   | 0.199745 | 1 | 3065 tags=29%, list=19%, signal=36% | 0.280329  | 0.94847   | 0.591636   | 0.789884 | 1 | 3337 tags=25%, list=21%, signal=32% |
| G_PROTEIN_COUPLED_RECEPTOR_AC                       | 169 | 0.405896 | 1.35162 | 0.00846433 | 0.199268 | 1 | 3632 tags=39%, list=23%, signal=50% | 0.293286  | 0.99555   | 0.458543   | 0.745881 | 1 | 2612 tags=26%, list=16%, signal=30% |
| NEGATIVE_REGULATION_OF_BIOSYN                       | 29  | 0.5168   | 1.35149 | 0.0833333  | 0.198963 | 1 | 3057 tags=60%, list=19%, signal=74% | 0.631008  | 1.44392   | 0.0616667  | 0.157199 | 1 | 2016 tags=47%, list=13%, signal=53% |
| GSE17721_POLYVIC_VS_CPG_24H_BMI                     | 183 | 0.407448 | 1.35097 | 0.01875    | 0.199515 | 1 | 2644 tags=14%, list=16%, signal=16% | -0.279405 | -1.07208  | 0.21875    | 0.553163 | 1 | 694 tags=6%, list=4%, signal=6%     |
| GSE15659_RESTING_TREG_VS_NONSI                      | 169 | 0.408304 | 1.35058 | 0.0171359  | 0.199749 | 1 | 2066 tags=28%, list=13%, signal=32% | 0.550434  | 1.44429   | 0.0461997  | 0.157721 | 1 | 2711 tags=34%, list=17%, signal=41% |
| GSE12366_NAIVE_VS_MEMORY_BCEI                       | 146 | 0.411361 | 1.35002 | 0.0223325  | 0.199661 | 1 | 2834 tags=25%, list=18%, signal=30% | 0.282928  | 0.958845  | 0.573494   | 0.778198 | 1 | 2750 tags=25%, list=17%, signal=30% |
| RAS_PROTEIN_SIGNAL_TRANSDUCTI                       | 60  | 0.461363 | 1.35009 | 0.0485714  | 0.199661 | 1 | 3138 tags=27%, list=20%, signal=33% | 0.246186  | 0.831831  | 0.889441   | 0.923894 | 1 | 3312 tags=25%, list=21%, signal=32% |
| BEHAVIOR                                            | 137 | 0.418354 | 1.3497  | 0.0255428  | 0.19988  | 1 | 3225 tags=36%, list=20%, signal=45% | 0.264409  | 0.872291  | 0.746819   | 0.891793 | 1 | 1990 tags=18%, list=12%, signal=20% |
| GSE7460_CTRL_VS_FOXP3_OVEREXP                       | 166 | 0.408934 | 1.34926 | 0.0122249  | 0.200296 | 1 | 2792 tags=28%, list=17%, signal=34% | 0.438784  | 1.30992   | 0.0647482  | 0.275439 | 1 | 2628 tags=29%, list=16%, signal=40% |
| GSE24142_EARLY_THYMIC_PROGENI                       | 175 | 0.407665 | 1.34924 | 0.0242718  | 0.199789 | 1 | 1645 tags=14%, list=10%, signal=15% | 0.400961  | 1.31594   | 0.0262123  | 0.271965 | 1 | 2837 tags=20%, list=18%, signal=24% |
| GSE17974_IL4_AND_ANTI_IL12_VS_U                     | 161 | 0.409943 | 1.34876 | 0.0160891  | 0.200166 | 1 | 3300 tags=28%, list=21%, signal=35% | 0.386034  | 1.27974   | 0.0515075  | 0.31295  | 1 | 2889 tags=25%, list=18%, signal=31% |
| GSE339_CD4POS_VS_CD8POS_DC_DM                       | 175 | 0.404463 | 1.34868 | 0.00854701 | 0.199799 | 1 | 3282 tags=37%, list=20%, signal=45% | 0.439188  | 1.46142   | 0.00121655 | 0.145413 | 1 | 2616 tags=28%, list=16%, signal=33% |
| REGULATION_OF_PHOSPHORYLATI                         | 47  | 0.480503 | 1.34736 | 0.0734673  | 0.201816 | 1 | 3118 tags=36%, list=19%, signal=44% | 0.285867  | 0.951816  | 0.56798    | 0.758449 | 1 | 3511 tags=30%, list=22%, signal=38% |
| GSE28237_FOLLICULAR_VS_EARLY_GI                     | 180 | 0.405862 | 1.34735 | 0.0192308  | 0.201282 | 1 | 2726 tags=32%, list=17%, signal=38% | 0.37953   | 1.27841   | 0.0475594  | 0.31386  | 1 | 2835 tags=31%, list=18%, signal=38% |
| GSE29618_LAIV_VS_TIV_FLU_VACCI                      | 178 | 0.401169 | 1.34507 | 0.0121655  | 0.205469 | 1 | 3093 tags=34%, list=19%, signal=42% | 0.443522  | 1.25188   | 0.110626   | 0.356532 | 1 | 2873 tags=38%, list=18%, signal=46% |
| ANION_TRANSMEMBRANE_TRANSP                          | 52  | 0.470491 | 1.34458 | 0.0712251  | 0.206065 | 1 | 3319 tags=33%, list=21%, signal=41% | 0.390236  | 1.32269   | 0.0188442  | 0.267894 | 1 | 3455 tags=34%, list=25%, signal=43% |
| ACTIVE_TRANSMEMBRANE_TRANSP                         | 110 | 0.425463 | 1.3437  | 0.0269231  | 0.207405 | 1 | 4539 tags=37%, list=28%, signal=51% | 0.329204  | 1.11146   | 0.220297   | 0.548859 | 1 | 3094 tags=25%, list=19%, signal=30% |
| SUBSTRATE_SPECIFIC_TRANSPORT                        | 344 | 0.380816 | 1.3435  | 0.00447427 | 0.207299 | 1 | 3639 tags=33%, list=23%, signal=42% | 0.272275  | 0.779859  | 0.884652   | 0.968754 | 1 | 2628 tags=15%, list=17%, signal=18% |
| GSE9988_LOW_LPS_VS_VEHICLE_TRE                      | 166 | 0.404833 | 1.34185 | 0.0212766  | 0.210376 | 1 | 3340 tags=31%, list=21%, signal=39% | 0.248086  | 0.796374  | 0.909814   | 0.958958 | 1 | 3011 tags=16%, list=19%, signal=20% |
| CATION_BINDING                                      | 187 | 0.402427 | 1.34134 | 0.0198366  | 0.211068 | 1 | 3119 tags=23%, list=19%, signal=28% | 0.300993  | 1.06877   | 0.283105   | 0.626539 | 1 | 2840 tags=17%, list=18%, signal=20% |
| REGULATION_OF_ANGIOGENESIS                          | 22  | 0.549841 | 1.34022 | 0.108865   | 0.211831 | 1 | 3098 tags=31%, list=19%, signal=38% | 0.354478  | 1.19241   | 0.105128   | 0.435653 | 1 | 3958 tags=36%, list=25%, signal=47% |
| GSE17721_LPS_VS_CPG_4H_BMDM_I                       | 186 | 0.401931 | 1.34021 | 0.0207824  | 0.211302 | 1 | 2885 tags=24%, list=18%, signal=29% | 0.275292  | 0.932393  | 0.635135   | 0.808634 | 1 | 3455 tags=24%, list=22%, signal=30% |
| POSITIVE_REGULATION_OF_I_KAPPA                      | 79  | 0.442123 | 1.34003 | 0.0429958  | 0.211445 | 1 | 3119 tags=25%, list=19%, signal=31% | 0.418082  | 1.36482   | 0.0204866  | 0.223993 |   |                                     |

Supplementary Table 3. Gene enrichment statistics for HD and control monkeys.

6

|                                                                |     |          |         |            |          |   |                                     |           |           |            |          |   |                                     |
|----------------------------------------------------------------|-----|----------|---------|------------|----------|---|-------------------------------------|-----------|-----------|------------|----------|---|-------------------------------------|
| GSE360_L_MAJOR_VS_B_MALAYI_LO DNA_PACKAGING                    | 169 | 0.402729 | 1.33348 | 0.0172626  | 0.218495 | 1 | 1879 tags=17%, list=12%, signal=19% | 0.333313  | 1.12458   | 0.198529   | 0.535583 | 1 | 3459 tags=24%, list=22%, signal=30% |
| GSE22886_IL2_VS_IL15_STIM_NKCELL                               | 30  | 0.515346 | 1.33307 | 0.0957792  | 0.218817 | 1 | 2714 tags=27%, list=17%, signal=32% | 0.447654  | 1.17587   | 0.207951   | 0.452887 | 1 | 2114 tags=30%, list=13%, signal=34% |
| GSE3982_BASOPHIL_VS_EFF_MEMOR CELL_MATRIX_ADHESION             | 161 | 0.401293 | 1.33303 | 0.02625    | 0.218416 | 1 | 2190 tags=14%, list=14%, signal=16% | 0.299784  | 1.00074   | 0.439904   | 0.739474 | 1 | 957 tags=9%, list=6%, signal=10%    |
| GSE3982_BASOPHIL_VS_EFF_MEMOR CELL_MATRIX_ADHESION             | 169 | 0.405473 | 1.33299 | 0.0170524  | 0.217938 | 1 | 3886 tags=38%, list=24%, signal=49% | -0.265673 | -0.101439 | 0.386139   | 0.625569 | 1 | 1983 tags=23%, list=12%, signal=26% |
| GSE3982_DC_VS_NKCELL_UP                                        | 34  | 0.50303  | 1.33289 | 0.0862866  | 0.217551 | 1 | 2963 tags=38%, list=18%, signal=47% | 0.457155  | 1.1974    | 0.214173   | 0.431486 | 1 | 2723 tags=26%, list=17%, signal=32% |
| GSE17721_POLYIC_VS_GARDIQUIMOD                                 | 183 | 0.398728 | 1.33266 | 0.0216086  | 0.217523 | 1 | 3044 tags=32%, list=19%, signal=39% | 0.326192  | 1.10821   | 0.216545   | 0.553338 | 1 | 2366 tags=23%, list=15%, signal=27% |
| GSE27786_NKCELL_VS_MONO_MAC_CYTOSKELETON_ORGANIZATION_ANC      | 186 | 0.395341 | 1.33198 | 0.0270727  | 0.218433 | 1 | 2731 tags=28%, list=17%, signal=33% | 0.326555  | 1.10508   | 0.237805   | 0.556024 | 1 | 2963 tags=27%, list=18%, signal=33% |
| GSE13411_NAIVE_BCELL_VS_PLASMA OXIDOREDUCTASE_ACTIVITY_Q0_001  | 166 | 0.398303 | 1.33147 | 0.0337349  | 0.218965 | 1 | 2967 tags=27%, list=18%, signal=33% | 0.289823  | 0.965996  | 0.540244   | 0.775083 | 1 | 3093 tags=23%, list=19%, signal=28% |
| GSE13411_NAIVE_BCELL_VS_PLASMA OXIDOREDUCTASE_ACTIVITY_Q0_001  | 183 | 0.397354 | 1.33051 | 0.0196078  | 0.218917 | 1 | 3338 tags=28%, list=21%, signal=35% | 0.337068  | 1.13452   | 0.180805   | 0.517857 | 1 | 2949 tags=26%, list=18%, signal=32% |
| GSE13411_NAIVE_BCELL_VS_PLASMA OXIDOREDUCTASE_ACTIVITY_Q0_001  | 164 | 0.405453 | 1.33023 | 0.0288582  | 0.220566 | 1 | 2163 tags=21%, list=13%, signal=24% | 0.45456   | 1.53637   | 0          | 0.107997 | 1 | 3226 tags=30%, list=20%, signal=38% |
| GSE17721_CTRL_VS_GARDIQUIMOD                                   | 31  | 0.519368 | 1.33004 | 0.0795796  | 0.220413 | 1 | 1612 tags=16%, list=10%, signal=18% | -0.362057 | -0.03944  | 0.365217   | 0.601353 | 1 | 2256 tags=19%, list=14%, signal=22% |
| GSE24142_ADULT_VS_FETAL_DN2_TF                                 | 330 | 0.38038  | 1.3296  | 0.00892857 | 0.220996 | 1 | 3119 tags=22%, list=19%, signal=27% | 0.307259  | 1.0977    | 0.21347    | 0.566088 | 1 | 4380 tags=26%, list=27%, signal=36% |
| GSE37416_CTRL_VS_48H_F_TULARENSIS                              | 178 | 0.400493 | 1.32946 | 0.0222772  | 0.220751 | 1 | 2978 tags=32%, list=19%, signal=39% | 0.312732  | 1.05876   | 0.311392   | 0.646443 | 1 | 3224 tags=30%, list=20%, signal=37% |
| GSE1460_INTRATHYMIC_T_PROGENII                                 | 174 | 0.397905 | 1.32942 | 0.0216607  | 0.220301 | 1 | 4085 tags=40%, list=25%, signal=53% | 0.264584  | 0.899061  | 0.737975   | 0.857113 | 1 | 3889 tags=33%, list=24%, signal=44% |
| GSE17721_CTRL_VS_GARDIQUIMOD_G_PROTEIN_COUPLED_RECEPTOR_PR     | 173 | 0.399618 | 1.32902 | 0.0272953  | 0.220615 | 1 | 3584 tags=38%, list=22%, signal=48% | 0.404483  | 1.36459   | 0.0161692  | 0.221868 | 1 | 3987 tags=45%, list=25%, signal=59% |
| GSE17721_CTRL_VS_GARDIQUIMOD_G_PROTEIN_COUPLED_RECEPTOR_PR     | 175 | 0.401344 | 1.32869 | 0.0207063  | 0.220797 | 1 | 1983 tags=18%, list=12%, signal=21% | 0.250937  | 0.846693  | 0.840686   | 0.913062 | 1 | 2174 tags=15%, list=14%, signal=18% |
| GSE29618_PRE_VS_DAY7_POST_LAIV                                 | 311 | 0.381299 | 1.32857 | 0.00671892 | 0.220491 | 1 | 2380 tags=14%, list=15%, signal=16% | 0.320375  | 1.13436   | 0.153584   | 0.516658 | 1 | 2443 tags=13%, list=15%, signal=15% |
| GSE17721_LPS_VS_PAM3CSK4_8H_BI                                 | 181 | 0.400204 | 1.32806 | 0.0134474  | 0.221035 | 1 | 3443 tags=39%, list=21%, signal=49% | 0.363104  | 1.21575   | 0.0719036  | 0.410948 | 1 | 3590 tags=39%, list=22%, signal=50% |
| GSE17721_CTRL_VS_GARDIQUIMOD                                   | 174 | 0.400442 | 1.32803 | 0.0263158  | 0.220579 | 1 | 3414 tags=33%, list=21%, signal=42% | -0.35425  | 1.20112   | 0.104348   | 0.427245 | 1 | 2661 tags=25%, list=17%, signal=30% |
| GSE24634_TREG_VS_TCONV_POST_D                                  | 173 | 0.397289 | 1.32765 | 0.0225282  | 0.22089  | 1 | 3071 tags=29%, list=19%, signal=36% | -0.239019 | -0.919215 | 0.763889   | 0.823677 | 1 | 3143 tags=27%, list=20%, signal=33% |
| GSE3982_MAST_CELL_VS_TH2_UP                                    | 177 | 0.399093 | 1.32699 | 0.0175219  | 0.221784 | 1 | 3747 tags=44%, list=23%, signal=56% | 0.437864  | 1.48374   | 0.00249377 | 0.137513 | 1 | 2490 tags=31%, list=16%, signal=36% |
| GSE7460_CTRL_VS_TGFB_TREATED_A                                 | 172 | 0.398325 | 1.32481 | 0.018226   | 0.226085 | 1 | 2734 tags=30%, list=17%, signal=35% | 0.339361  | 1.15053   | 0.169345   | 0.490201 | 1 | 2450 tags=29%, list=15%, signal=34% |
| GSE9988_LPS_VS_CTRL_TREATED_MC                                 | 174 | 0.398129 | 1.32447 | 0.020757   | 0.226304 | 1 | 3512 tags=40%, list=22%, signal=50% | 0.279727  | 0.946057  | 0.600487   | 0.793188 | 1 | 3281 tags=28%, list=20%, signal=35% |
| GSE9988_LPS_VS_CTRL_TREATED_MC                                 | 166 | 0.402358 | 1.32446 | 0.0210918  | 0.225771 | 1 | 2597 tags=30%, list=16%, signal=35% | 0.297385  | 1.00848   | 0.443489   | 0.729504 | 1 | 2339 tags=21%, list=15%, signal=24% |
| GSE9988_ANTI_TREM1_VS_CTRL_TRE                                 | 170 | 0.397794 | 1.32404 | 0.0311333  | 0.226187 | 1 | 2082 tags=26%, list=13%, signal=29% | 0.377065  | 1.26158   | 0.047375   | 0.341065 | 1 | 3104 tags=34%, list=19%, signal=42% |
| GSE22886_CTRL_VS_LPS_24H_DC_DN                                 | 176 | 0.397306 | 1.32388 | 0.0145103  | 0.225951 | 1 | 3225 tags=37%, list=20%, signal=46% | 0.340252  | 1.15306   | 0.155067   | 0.488867 | 1 | 3246 tags=32%, list=20%, signal=40% |
| POSITIVE_REGULATION_OF_PROTEIN SUBSTRATE_SPECIFIC_CHANNEL_ACTI | 70  | 0.440288 | 1.32387 | 0.0619469  | 0.225448 | 1 | 3461 tags=37%, list=22%, signal=47% | 0.395365  | 1.18934   | 0.169231   | 0.44062  | 1 | 2701 tags=33%, list=17%, signal=39% |
| PROTEIN_BINDING_BRIDGING                                       | 132 | 0.406356 | 1.32377 | 0.021197   | 0.225123 | 1 | 2776 tags=17%, list=17%, signal=21% | 0.337084  | 1.10183   | 0.246415   | 0.558736 | 1 | 4126 tags=21%, list=26%, signal=28% |
| GSE13738_RESTING_VS_BYSTANDER                                  | 55  | 0.459231 | 1.32369 | 0.0836941  | 0.224745 | 1 | 2792 tags=36%, list=17%, signal=44% | 0.355048  | 1.03385   | 0.425406   | 0.691831 | 1 | 2942 tags=29%, list=18%, signal=35% |
| GSE17974_OH_VS_72H_IN_VITRO_AC                                 | 177 | 0.399691 | 1.32357 | 0.0258303  | 0.224486 | 1 | 1884 tags=28%, list=12%, signal=31% | 0.386006  | 1.30457   | 0.0248139  | 0.281969 | 1 | 4110 tags=46%, list=26%, signal=62% |
| KINASE_REGULATOR_ACTIVITY                                      | 176 | 0.398079 | 1.32332 | 0.0185874  | 0.224513 | 1 | 2687 tags=30%, list=17%, signal=35% | 0.416934  | 1.39251   | 0.0062422  | 0.199367 | 1 | 3815 tags=48%, list=24%, signal=62% |
| GSE24634_TREG_VS_TCONV_POST_D                                  | 43  | 0.489003 | 1.32287 | 0.078056   | 0.224993 | 1 | 1781 tags=26%, list=11%, signal=29% | 0.44332   | 1.23064   | 0.164305   | 0.384184 | 1 | 2830 tags=33%, list=18%, signal=39% |
| GSE25087_FETAL_VS_ADULT_TREG_L                                 | 177 | 0.397118 | 1.3228  | 0.0202788  | 0.224635 | 1 | 2983 tags=37%, list=19%, signal=45% | 0.339483  | 1.14496   | 0.174905   | 0.501043 | 1 | 3016 tags=31%, list=19%, signal=38% |
| GSE3982_MAC_VS_TH1_UP                                          | 169 | 0.398925 | 1.32272 | 0.032967   | 0.224822 | 1 | 3997 tags=41%, list=25%, signal=54% | 0.367973  | 1.23151   | 0.0649687  | 0.382766 | 1 | 3534 tags=37%, list=22%, signal=47% |
| GSE3982_MAC_VS_TH1_UP                                          | 166 | 0.399873 | 1.3227  | 0.0208333  | 0.22382  | 1 | 2785 tags=33%, list=17%, signal=40% | -0.276469 | -0.14077  | 0.264317   | 0.589609 | 1 | 1928 tags=23%, list=12%, signal=26% |
| GSE37416_OH_VS_12H_F_TULARENSIS                                | 174 | 0.398793 | 1.32099 | 0.0246002  | 0.227105 | 1 | 3344 tags=38%, list=21%, signal=47% | -0.28512  | -1.11159  | 0.127168   | 0.505706 | 1 | 2839 tags=33%, list=18%, signal=39% |
| GTPASE_ACTIVATOR_ACTIVITY                                      | 53  | 0.456469 | 1.31997 | 0.0628571  | 0.228872 | 1 | 1122 tags=19%, list=7%, signal=20%  | -0.260512 | -0.840034 | 0.822368   | 0.962159 | 1 | 1885 tags=21%, list=12%, signal=23% |
| GSE39820_CTRL_VS_TGFBETA1_IL6_IL                               | 179 | 0.394087 | 1.3199  | 0.0248815  | 0.228485 | 1 | 3962 tags=40%, list=25%, signal=52% | 0.297307  | 1.00396   | 0.444878   | 0.738221 | 1 | 2079 tags=21%, list=13%, signal=24% |
| GSE3982_GENT_MEMORV_CD4_TCELL                                  | 185 | 0.395174 | 1.31937 | 0.02657    | 0.229127 | 1 | 2880 tags=32%, list=18%, signal=39% | 0.440691  | 1.49389   | 0.00119904 | 0.133733 | 1 | 3038 tags=38%, list=19%, signal=46% |
| GSE29618_PDC_VS_MDC_DN                                         | 176 | 0.397636 | 1.31922 | 0.0329337  | 0.228973 | 1 | 4005 tags=45%, list=25%, signal=59% | -0.27785  | -1.08421  | 0.183168   | 0.541261 | 1 | 2126 tags=35%, list=19%, signal=43% |
| POSITIVE_REGULATION_OF_CELLULAI                                | 69  | 0.444723 | 1.31911 | 0.0649526  | 0.22878  | 1 | 3461 tags=38%, list=22%, signal=48% | 0.411208  | 1.140895  | 0.368627   | 0.31061  | 1 | 3701 tags=33%, list=17%, signal=40% |
| GSE360_CTRL_VS_T_GONDIJ_DC_DN                                  | 173 | 0.395329 | 1.3191  | 0.0334528  | 0.228269 | 1 | 3186 tags=28%, list=20%, signal=35% | 0.352376  | 1.18577   | 0.106516   | 0.446023 | 1 | 2516 tags=22%, list=16%, signal=26% |
| CELL_CELL_ADHESION                                             | 79  | 0.438611 | 1.31905 | 0.0589023  | 0.227899 | 1 | 2918 tags=25%, list=18%, signal=31% | 0.439254  | 1.34105   | 0.064719   | 0.249589 | 1 | 3623 tags=27%, list=23%, signal=34% |
| CYTOKINE_PRODUCTION                                            | 69  | 0.445275 | 1.31895 | 0.0683403  | 0.227605 | 1 | 3461 tags=43%, list=22%, signal=54% | 0.415299  | 1.23447   | 0.122419   | 0.381642 | 1 | 3215 tags=36%, list=20%, signal=45% |
| GSE3982_MAC_VS_BASOPHIL_UP                                     | 170 | 0.39872  | 1.31878 | 0.0221948  | 0.229616 | 1 | 3963 tags=41%, list=25%, signal=54% | 0.520653  | -0.963998 | 0.562842   | 0.738871 | 1 | 1410 tags=15%, list=9%, signal=17%  |
| GSE9988_ANTI_TREM1_AND_LPS_VS                                  | 166 | 0.399482 | 1.3171  | 0.0271941  | 0.230737 | 1 | 2082 tags=26%, list=13%, signal=29% | 0.431231  | 1.45047   | 0.00125628 | 0.152463 | 1 | 2757 tags=31%, list=17%, signal=37% |
| GSE3982_BCELL_VS_TH2_DN                                        | 178 | 0.396421 | 1.31692 | 0.023199   | 0.230711 | 1 | 3126 tags=29%, list=19%, signal=36% | 0.332291  | 1.12431   | 0.204433   | 0.534769 | 1 | 3114 tags=28%, list=19%, signal=34% |
| REGULATION_OF_PROTEIN_METABOLI                                 | 159 | 0.397996 | 1.31656 | 0.0223048  | 0.231026 | 1 | 3461 tags=30%, list=22%, signal=38% | 0.338807  | 1.13803   | 0.197689   | 0.512409 | 1 | 2838 tags=26%, list=18%, signal=32% |
| PEPTIDE_RECEPTOR_ACTIVITY                                      | 49  | 0.473218 | 1.31607 | 0.0801715  | 0.231697 | 1 | 2320 tags=14%, list=14%, signal=17% | 0.385273  | 1.0935    | 0.298485   | 0.579598 | 1 | 3169 tags=12%, list=20%, signal=15% |
| GSE24142_DN2_VS_DN3_THYMOCYT                                   | 176 | 0.395126 | 1.31604 | 0.0263488  | 0.231256 | 1 | 3030 tags=28%, list=19%, signal=35% | 0.363294  | 1.22958   | 0.0786802  | 0.385598 | 1 | 3273 tags=30%, list=20%, signal=37% |
| GSE17721_LPS_VS_GARDIQUIMOD_1                                  | 172 | 0.394662 | 1.31496 | 0.0272189  | 0.233091 | 1 | 2839 tags=31%, list=18%, signal=37% | 0.455991  | 1.53674   | 0          | 0.108843 | 1 | 2842 tags=35%, list=18%, signal=43% |
| GSE32423_MEMORY_VS_NAIVE_CD8                                   | 172 | 0.398276 | 1.31486 | 0.0277078  | 0.232847 | 1 | 2578 tags=28%, list=16%, signal=34% | 0.28804   | 0.96586   | 0.54759    | 0.775024 | 1 | 3350 tags=28%, list=21%, signal=36% |
| GSE3982_DC_VS_BCELL_UP                                         | 174 | 0.395618 | 1.3142  | 0.0225     | 0.233854 | 1 | 3131 tags=38%, list=20%, signal=47% | 0.371736  | 1.25688   | 0.0383189  | 0.347713 | 1 | 2592 tags=29%, list=16%, signal=35% |
| GROWTH_FACTOR_ACTIVITY                                         | 52  | 0.460684 | 1.31418 | 0.0916905  | 0.233359 | 1 | 3093 tags=17%, list=19%, signal=21% | 0.434963  | 1.25361   | 0.130564   | 0.354088 | 1 | 4882 tags=29%, list=30%, signal=41% |
| GSE37416_OH_VS_3H_F_TULARENSIS                                 | 177 | 0.394006 | 1.31393 | 0.0217654  | 0.233408 | 1 | 3108 tags=33%, list=19%, signal=41% | 0.344331  | 1.16263   | 0.157178   | 0.477986 | 1 | 2570 tags=29%, list=16%, signal=34% |
| GSE30083_SP1_VS_SP4_THYMOCYTE                                  | 176 | 0.395789 | 1.31345 | 0.0336943  | 0.233998 | 1 | 3043 tags=31%, list=19%, signal=38% | 0.404181  | 1.36431   | 0.0125     | 0.221597 | 1 | 2249 tags=22%, list=14%, signal=25% |
| GSE17721_LPS_VS_GARDIQUIMOD_8                                  | 182 | 0.39078  | 1.31302 | 0.0204819  | 0.234434 | 1 | 2648 tags=24%, list=16%, signal=28% | 0.334392  | 1.14129   | 0.166061   | 0.509245 | 1 | 2571 tags=21%, list=16%, signal=25% |
| GSE1460_CD4_THYMOCYTE_VS_NAIV                                  | 179 | 0.393664 | 1.31301 | 0.0328068  | 0.233931 | 1 | 2975 tags=35%, list=19%, signal=43% | 0.393669  | 1.32997   | 0.0164766  | 0.263158 | 1 | 2947 tags=35%, list=18%, signal=42% |
| PROTEIN_KINASE_CASCADE                                         | 270 | 0.380637 | 1.31231 | 0.0125428  | 0.235083 | 1 | 3420 tags=31%, list=21%, signal=43% |           |           |            |          |   |                                     |

Supplementary Table 3. Gene enrichment statistics for HD and control monkeys.

|                                  |     |          |         |           |          |   |                                     |           |           |            |           |       |                                     |
|----------------------------------|-----|----------|---------|-----------|----------|---|-------------------------------------|-----------|-----------|------------|-----------|-------|-------------------------------------|
| GSE360_L_DONOVANI_VS_B_MALAYI    | 181 | 0.389204 | 1.30397 | 0.0244798 | 0.2428   | 1 | 3131 tags=33%, list=20%, signal=41% | 0.392945  | 1.34299   | 0.0148883  | 0.248201  | 1     | 2389 tags=23%, list=15%, signal=27% |
| GSE17721_POLYIC_VS_GARDIQUIMO    | 171 | 0.392895 | 1.30307 | 0.0293758 | 0.24458  | 1 | 3131 tags=30%, list=20%, signal=37% | 0.397731  | 1.32116   | 0.0213568  | 0.26691   | 1     | 3778 tags=35%, list=24%, signal=45% |
| GSE14769_UNSTIM_VS_240MIN_LPS    | 178 | 0.391494 | 1.30291 | 0.032967  | 0.244432 | 1 | 2867 tags=32%, list=18%, signal=39% | -0.305786 | -1.18649  | 0.040201   | 0.442186  | 1     | 2437 tags=28%, list=15%, signal=32% |
| REGULATION_OF_GROWTH             | 55  | 0.460483 | 1.30238 | 0.0839161 | 0.25089  | 1 | 1922 tags=20%, list=12%, signal=23% | 0.443402  | 1.27766   | 0.050404   | 0.314553  | 1     | 2667 tags=29%, list=17%, signal=35% |
| GSE17974_CTRL_VS_ACT_IL4_AND_A   | 156 | 0.402274 | 1.30177 | 0.03375   | 0.246051 | 1 | 2082 tags=25%, list=13%, signal=28% | 0.348402  | 1.15107   | 0.179423   | 0.491222  | 1     | 2248 tags=26%, list=14%, signal=30% |
| GSE17721_0.5H_VS_12H_CPG_BMDM    | 181 | 0.387752 | 1.30136 | 0.0369458 | 0.246569 | 1 | 2934 tags=29%, list=18%, signal=35% | 0.276191  | 0.932276  | 0.636139   | 0.807512  | 1     | 2391 tags=20%, list=15%, signal=23% |
| GSE17721_CTRL_VS_GARDIQUIMO_2    | 177 | 0.394029 | 1.30129 | 0.034689  | 0.246245 | 1 | 3280 tags=33%, list=20%, signal=41% | 0.255448  | 0.862402  | 0.074540   | 0.899328  | 1     | 3121 tags=25%, list=19%, signal=31% |
| POSITIVE_REGULATION_OF_PHOSPHO   | 24  | 0.527526 | 1.3009  | 0.136086  | 0.246668 | 1 | 3093 tags=38%, list=19%, signal=46% | 0.392092  | 0.96738   | 0.505512   | 0.776605  | 1     | 1415 tags=25%, list=9%, signal=27%  |
| PEPTIDYL_TYROSINE_MODIFICATION   | 27  | 0.513767 | 1.30046 | 0.11254   | 0.247188 | 1 | 3093 tags=33%, list=19%, signal=41% | -0.331398 | -0.93039  | 0.548295   | 0.799552  | 1     | 2105 tags=30%, list=13%, signal=34% |
| NEGATIVE_REGULATION_OF_DEVELO    | 180 | 0.387752 | 1.29944 | 0.0297767 | 0.249116 | 1 | 3607 tags=33%, list=22%, signal=42% | 0.372947  | 1.26843   | 0.0448319  | 0.330488  | 1     | 3009 tags=27%, list=19%, signal=33% |
| INTERPHASE                       | 61  | 0.447039 | 1.29938 | 0.0840456 | 0.248755 | 1 | 2883 tags=36%, list=18%, signal=44% | 0.470171  | 1.3918    | 0.031215   | 0.198995  | 1     | 2667 tags=41%, list=17%, signal=49% |
| M_PHASE_OF_MITOTIC_CELL_CYCLE    | 75  | 0.435466 | 1.29935 | 0.0627675 | 0.24833  | 1 | 4032 tags=51%, list=25%, signal=67% | 0.464255  | 1.40759   | 0.0348675  | 0.184325  | 1     | 3068 tags=44%, list=19%, signal=54% |
| GROWTH_FACTOR_BINDING            | 27  | 0.513256 | 1.29926 | 0.118462  | 0.248035 | 1 | 2333 tags=33%, list=15%, signal=39% | 0.454823  | 1.1507    | 0.266254   | 0.490801  | 1     | 2667 tags=41%, list=17%, signal=49% |
| GSE22886_NAIVE_CD4_TCELL_VS_12I  | 180 | 0.38972  | 1.29918 | 0.0345253 | 0.247747 | 1 | 2982 tags=30%, list=19%, signal=36% | 0.375897  | 1.27875   | 0.045283   | 0.315108  | 1     | 3093 tags=32%, list=19%, signal=39% |
| GSE26669_CTRL_VS_COSTIM_BLOCK    | 176 | 0.394695 | 1.29892 | 0.0277778 | 0.247983 | 1 | 2957 tags=32%, list=18%, signal=39% | 0.285381  | 0.96734   | 0.55198    | 0.776217  | 1     | 3137 tags=31%, list=20%, signal=38% |
| GSE360_CTRL_VS_B_MALAYI_LOW_D    | 176 | 0.390703 | 1.29706 | 0.0346475 | 0.246475 | 1 | 2635 tags=22%, list=16%, signal=26% | -0.257016 | -0.989308 | 0.458537   | 0.67652   | 1     | 1455 tags=14%, list=9%, signal=15%  |
| GSE17721_CPG_VS_GARDIQUIMO_1     | 181 | 0.386556 | 1.29705 | 0.0456227 | 0.251489 | 1 | 3419 tags=34%, list=21%, signal=42% | 0.291806  | 0.987207  | 0.492044   | 0.752314  | 1     | 2533 tags=22%, list=16%, signal=26% |
| GSE360_DC_VS_MAC_L_DONOVANI      | 184 | 0.38786  | 1.29681 | 0.0331695 | 0.251617 | 1 | 3229 tags=34%, list=20%, signal=42% | 0.337159  | 1.14288   | 0.037391   | 0.506323  | 1     | 2229 tags=24%, list=14%, signal=28% |
| INFLAMMATORY_RESPONSE            | 119 | 0.40373  | 1.2967  | 0.0471338 | 0.251336 | 1 | 2783 tags=27%, list=17%, signal=32% | 0.333731  | 1.08156   | 0.280263   | 0.601456  | 1     | 1805 tags=18%, list=11%, signal=20% |
| RAS_GTPASE_BINDING               | 20  | 0.537626 | 1.29621 | 0.11838   | 0.25201  | 1 | 3054 tags=35%, list=19%, signal=43% | -0.278135 | -0.728511 | 0.895722   | 0.994373  | 1     | 4122 tags=40%, list=26%, signal=54% |
| GSE9006_HEALTHY_VS_TYPE_1_DIAB   | 166 | 0.391339 | 1.29584 | 0.0363636 | 0.252472 | 1 | 2975 tags=34%, list=19%, signal=42% | 0.308473  | 1.0408    | 0.359494   | 0.681946  | 1     | 2873 tags=27%, list=18%, signal=32% |
| GSE17974_0.5H_VS_72H_UNTREATED   | 170 | 0.392008 | 1.29567 | 0.0326877 | 0.252428 | 1 | 2764 tags=32%, list=17%, signal=39% | 0.401312  | 1.35346   | 0.0133657  | 0.238663  | 1     | 3302 tags=42%, list=21%, signal=58% |
| GSE17721_LPS_VS_CPG_4H_BMDM_1    | 173 | 0.389661 | 1.29565 | 0.0423729 | 0.251959 | 1 | 3387 tags=34%, list=21%, signal=42% | 0.313502  | 1.06304   | 0.033603   | 0.638723  | 1     | 3540 tags=30%, list=22%, signal=32% |
| GSE17721_LPS_VS_PAM3CSK4_2H_BI   | 183 | 0.388646 | 1.29557 | 0.0432099 | 0.251659 | 1 | 2742 tags=27%, list=17%, signal=32% | 0.340067  | 1.15624   | 0.14931    | 0.48723   | 1     | 2457 tags=25%, list=15%, signal=29% |
| GSE9006_IOMOUTH_VS_4MONTH_PO     | 172 | 0.388151 | 1.29459 | 0.0314389 | 0.253356 | 1 | 3438 tags=35%, list=21%, signal=44% | 0.27489   | 0.938137  | 0.60101    | 0.801209  | 1     | 3681 tags=28%, list=23%, signal=37% |
| GSE13484_12H_VS_3H_F17D_VACCI    | 173 | 0.391872 | 1.29428 | 0.0300752 | 0.25361  | 1 | 3405 tags=34%, list=21%, signal=43% | 0.303572  | 1.02397   | 0.393564   | 0.703959  | 1     | 3005 tags=23%, list=19%, signal=28% |
| REGULATION_OF_CELL_GROWTH        | 43  | 0.475802 | 1.29421 | 0.111111  | 0.25361  | 1 | 1922 tags=23%, list=12%, signal=26% | 0.482129  | 1.35873   | 0.0824427  | 0.232018  | 1     | 2667 tags=33%, list=17%, signal=39% |
| INTERPHASE_OF_MITOTIC_CELL_CYCLE | 57  | 0.452843 | 1.29407 | 0.0878661 | 0.253172 | 1 | 2883 tags=37%, list=18%, signal=45% | 0.471248  | 1.38515   | 0.0328571  | 0.198181  | 1     | 2667 tags=42%, list=17%, signal=50% |
| GSE25087_TREG_VS_TCONV_ADULT_1   | 171 | 0.386787 | 1.29373 | 0.0369004 | 0.253562 | 1 | 3178 tags=36%, list=20%, signal=45% | 0.29974   | 0.998796  | 0.468323   | 0.742229  | 1     | 3200 tags=30%, list=20%, signal=38% |
| GSE17721_PAM3CSK4_VS_CPG_1H_B    | 177 | 0.393576 | 1.29275 | 0.0297974 | 0.255446 | 1 | 2570 tags=27%, list=16%, signal=32% | 0.360576  | 1.20618   | 0.08625    | 0.421905  | 1     | 2514 tags=24%, list=16%, signal=28% |
| UNFOLDED_PROTEIN_BINDING         | 37  | 0.481581 | 1.2924  | 0.106447  | 0.255733 | 1 | 3660 tags=38%, list=23%, signal=49% | 0.538752  | 1.45394   | 0.0452489  | 0.149935  | 1     | 3480 tags=54%, list=22%, signal=69% |
| GSE10239_MEMORY_VS_KLRG1HIGH     | 172 | 0.390012 | 1.29217 | 0.0318627 | 0.255817 | 1 | 3945 tags=37%, list=25%, signal=49% | 0.32846   | 1.10347   | 0.252125   | 0.555387  | 1     | 3082 tags=33%, list=19%, signal=40% |
| GSE13411_NAIVE_VS_IGM_MEMORY     | 174 | 0.387388 | 1.29161 | 0.0355828 | 0.256669 | 1 | 2964 tags=31%, list=18%, signal=38% | 0.460612  | 1.54056   | 0          | 0.109221  | 1     | 3510 tags=36%, list=22%, signal=46% |
| GSE20366_CD103_POS_VS_NEG_TRE    | 182 | 0.386937 | 1.29158 | 0.035109  | 0.256263 | 1 | 2585 tags=20%, list=16%, signal=23% | 0.288121  | 0.970268  | 0.54399    | 0.774005  | 1     | 3046 tags=18%, list=19%, signal=22% |
| GSE37416_CTRL_VS_12H_F_TULAREN   | 175 | 0.389389 | 1.29123 | 0.0375587 | 0.256634 | 1 | 3708 tags=37%, list=23%, signal=48% | -0.293363 | -1.13267  | 0.0789474  | 0.474978  | 1     | 2218 tags=27%, list=14%, signal=31% |
| GSE17721_CPG_VS_GARDIQUIMO_1     | 178 | 0.386039 | 1.29109 | 0.0330073 | 0.256424 | 1 | 3296 tags=26%, list=21%, signal=32% | 0.386367  | 1.30125   | 0.0308789  | 0.284338  | 1     | 1610 tags=18%, list=10%, signal=20% |
| GSE8515_CTRL_VS_IL6_4H_STIM_MA   | 165 | 0.392704 | 1.29103 | 0.0419753 | 0.256076 | 1 | 3096 tags=32%, list=19%, signal=39% | 0.245463  | 0.8259    | 0.880952   | 0.930449  | 1     | 3627 tags=28%, list=23%, signal=36% |
| GSE9988_LOW_LPS_VS_ANTI_TREM1    | 165 | 0.391855 | 1.29098 | 0.033121  | 0.255726 | 1 | 3673 tags=38%, list=23%, signal=48% | -0.275608 | -1.03954  | 0.324201   | 0.602416  | 1     | 1692 tags=19%, list=11%, signal=21% |
| GSE17721_0.5H_VS_8H_GARDIQUIMO   | 174 | 0.390211 | 1.29049 | 0.0392157 | 0.256472 | 1 | 2520 tags=28%, list=16%, signal=33% | 0.36894   | 1.23487   | 0.0744417  | 0.383218  | 1     | 3290 tags=34%, list=20%, signal=42% |
| GSE24142_ADULT_VS_FETAL_EARLY_1  | 170 | 0.388449 | 1.28994 | 0.0276775 | 0.25735  | 1 | 3323 tags=31%, list=21%, signal=39% | -0.301181 | -1.11969  | 0.166668   | 0.493855  | 1     | 2853 tags=31%, list=18%, signal=38% |
| GSE25087_TREG_VS_TCONV_FETUS_1   | 170 | 0.390811 | 1.28919 | 0.0378973 | 0.257826 | 1 | 2174 tags=26%, list=14%, signal=30% | 0.275196  | 0.927553  | 0.626337   | 0.81662   | 1     | 1804 tags=18%, list=11%, signal=20% |
| GSE10325_LUPUS_CD4_TCELL_VS_LU   | 148 | 0.393464 | 1.28888 | 0.0407911 | 0.259015 | 1 | 3297 tags=39%, list=21%, signal=48% | 0.365138  | 1.20357   | 0.114213   | 0.426292  | 1     | 2609 tags=31%, list=16%, signal=37% |
| GSE37416_12H_VS_48H_F_TULAREN    | 177 | 0.386681 | 1.28879 | 0.0373945 | 0.25882  | 1 | 3882 tags=45%, list=24%, signal=58% | -0.314068 | -1.20205  | 0.0490196  | 0.482432  | 1     | 1841 tags=27%, list=11%, signal=30% |
| REGULATION_OF_BINDING            | 52  | 0.452622 | 1.28873 | 0.0985507 | 0.258505 | 1 | 2597 tags=35%, list=16%, signal=41% | 0.460058  | 1.30798   | 0.0868307  | 0.274432  | 1     | 3560 tags=37%, list=22%, signal=47% |
| REGULATION_OF_PROTEIN_MODIFIC    | 42  | 0.472081 | 1.28871 | 0.114504  | 0.25807  | 1 | 4057 tags=40%, list=25%, signal=54% | 0.468617  | 1.31561   | 0.0906389  | 0.271993  | 1     | 2837 tags=36%, list=18%, signal=43% |
| REGULATION_OF_CELLULAR_PROTEIN   | 151 | 0.393767 | 1.28805 | 0.0440636 | 0.259145 | 1 | 3461 tags=31%, list=22%, signal=39% | 0.348718  | 1.14427   | 0.17744    | 0.502897  | 1     | 2838 tags=27%, list=18%, signal=33% |
| GSE3982_DC_VS_TH1_DN             | 180 | 0.390641 | 1.28795 | 0.0505415 | 0.258887 | 1 | 2025 tags=22%, list=13%, signal=25% | 0.493295  | 1.674     | 0          | 0.0501848 | 0.793 | 3640 tags=46%, list=23%, signal=58% |
| MITOSIS                          | 72  | 0.43461  | 1.28755 | 0.063772  | 0.259404 | 1 | 4032 tags=50%, list=25%, signal=66% | 0.462198  | 1.41348   | 0.0200573  | 0.175946  | 1     | 3068 tags=43%, list=19%, signal=53% |
| ANATOMICAL_STRUCTURE_FORMATI     | 49  | 0.457305 | 1.28729 | 0.10365   | 0.259591 | 1 | 2077 tags=22%, list=13%, signal=26% | -0.297359 | -0.940626 | 0.574468   | 0.777007  | 1     | 2898 tags=27%, list=18%, signal=32% |
| GSE27786_NKTCCELL_VS_ERYTHROBLA  | 175 | 0.389554 | 1.28689 | 0.0385078 | 0.260109 | 1 | 2405 tags=19%, list=15%, signal=22% | 0.271297  | 0.912921  | 0.673569   | 0.835676  | 1     | 2802 tags=17%, list=17%, signal=20% |
| GSE20715_OH_VS_GH_OZONE_LUNG     | 182 | 0.382495 | 1.28664 | 0.0313631 | 0.260247 | 1 | 2195 tags=23%, list=14%, signal=26% | 0.265732  | 0.894148  | 0.742683   | 0.86514   | 1     | 3350 tags=25%, list=21%, signal=31% |
| GSE12845_NAIVE_VS_PRE_GC_TONSI   | 183 | 0.385149 | 1.28656 | 0.0302663 | 0.259949 | 1 | 2854 tags=27%, list=18%, signal=33% | 0.427903  | 1.44745   | 0.00251256 | 0.154662  | 1     | 2582 tags=28%, list=16%, signal=33% |
| GSE7852_IN_VS_THYMUS_TREG_DN     | 178 | 0.389781 | 1.28583 | 0.045067  | 0.261225 | 1 | 2013 tags=22%, list=13%, signal=25% | 0.34602   | 1.17379   | 0.141074   | 0.457617  | 1     | 2235 tags=24%, list=14%, signal=27% |
| GSE17580_TREG_VS_TEFF_S_MANSO    | 179 | 0.388017 | 1.28566 | 0.04474   | 0.261198 | 1 | 3179 tags=34%, list=20%, signal=41% | 0.344109  | 1.16323   | 0.133085   | 0.478308  | 1     | 3364 tags=36%, list=21%, signal=45% |
| GSE9037_WT_VS_IRAK4_KO_BMDM_1    | 172 | 0.384445 | 1.28497 | 0.037594  | 0.262459 | 1 | 2595 tags=23%, list=16%, signal=27% | 0.360923  | 1.20885   | 0.0934343  | 0.418262  | 1     | 2792 tags=26%, list=17%, signal=31% |
| GSE7460_CD8_TCELL_VS_TREG_ACT_1  | 174 | 0.386093 | 1.28327 | 0.0416667 | 0.262620 | 1 | 2576 tags=28%, list=16%, signal=33% | 0.32214   | 1.08599   | 0.277919   | 0.593548  | 1     | 3122 tags=28%, list=19%, signal=35% |
| PROTEIN_KINASE_REGULATOR_ACTIV   | 36  | 0.483304 | 1.28209 | 0.122862  | 0.266883 | 1 | 1781 tags=25%, list=11%, signal=28% | 0.440985  | 1.18966   | 0.109094   | 0.441442  | 1     | 2830 tags=28%, list=18%, signal=34% |
| GSE24142_EARLY_THYMIC_PROGENIT   | 171 | 0.387723 | 1.28121 | 0.0337922 | 0.270437 | 1 | 2881 tags=26%, list=18%, signal=31% | 0.317204  | 1.05681   | 0.337905   | 0.651029  | 1     | 2637 tags=21%, list=16%, signal=25% |
| GSE3982_MEMORY_CD4_TCELL_VS_E    | 159 | 0.386229 | 1.28072 | 0.0458959 | 0.271182 | 1 | 3263 tags=37%, list=20%, signal=46% | 0.372607  | 1.23847   | 0.0821194  | 0.377581  | 1     | 2500 tags=30%, list=16%, signal=35% |
| REGULATION_OF_G_PROTEIN_COUPL    | 1   |          |         |           |          |   |                                     |           |           |            |           |       |                                     |

Supplementary Table 3. Gene enrichment statistics for HD and control monkeys.

8

|                                 |     |          |         |           |          |   |                                     |           |           |            |           |       |                                     |
|---------------------------------|-----|----------|---------|-----------|----------|---|-------------------------------------|-----------|-----------|------------|-----------|-------|-------------------------------------|
| GSE13306_RA_VS_UNTREATED_TREG   | 167 | 0.383416 | 1.27283 | 0.0351942 | 0.28059  | 1 | 3222 tags=29%, list=20%, signal=36% | 0.322584  | 1.08419   | 0.26799    | 0.597585  | 1     | 2899 tags=23%, list=18%, signal=28% |
| GSE20366_CD103_POS_VS_NEG_TRE   | 166 | 0.388008 | 1.27276 | 0.0532688 | 0.280217 | 1 | 2187 tags=19%, list=14%, signal=21% | -0.323922 | -1.23529  | 0.016129   | 0.384667  | 1     | 2056 tags=22%, list=13%, signal=25% |
| GSE17721_LPS_VS_GARDIQUIMOD_8   | 178 | 0.381183 | 1.27213 | 0.0414201 | 0.281391 | 1 | 3241 tags=31%, list=20%, signal=38% | 0.280662  | 0.953885  | 0.574522   | 0.782093  | 1     | 1643 tags=15%, list=10%, signal=16% |
| GSE7852_TREG_VS_TCONV_FAT_DN    | 176 | 0.382088 | 1.27194 | 0.0380368 | 0.281421 | 1 | 2648 tags=29%, list=16%, signal=34% | 0.301073  | 1.02519   | 0.414933   | 0.702213  | 1     | 2661 tags=26%, list=17%, signal=30% |
| GSE17721_CPG_VS_GARDIQUIMOD_7   | 180 | 0.381915 | 1.27185 | 0.0393604 | 0.28116  | 1 | 2808 tags=23%, list=17%, signal=28% | 0.352281  | 1.19213   | 0.113208   | 0.436034  | 1     | 2740 tags=19%, list=17%, signal=23% |
| GSE15659_RESTING_VS_ACTIVATED_1 | 167 | 0.383798 | 1.27161 | 0.0556258 | 0.281348 | 1 | 3010 tags=27%, list=19%, signal=33% | 0.256115  | 0.860974  | 0.80273    | 0.89816   | 1     | 3325 tags=26%, list=21%, signal=33% |
| GSE29615_CTRL_VS_LAIV_FLU_VACCI | 153 | 0.386985 | 1.27145 | 0.0586035 | 0.281207 | 1 | 3373 tags=31%, list=21%, signal=39% | 0.323878  | 1.0819    | 0.296389   | 0.601902  | 1     | 2820 tags=22%, list=18%, signal=26% |
| GSE17721_LPS_VS_POLYIC_12H_BMC  | 180 | 0.381844 | 1.27112 | 0.0414201 | 0.281551 | 1 | 2917 tags=27%, list=18%, signal=33% | 0.357617  | 1.20156   | 0.102941   | 0.427829  | 1     | 2893 tags=28%, list=18%, signal=34% |
| GSE15215_CD2_POS_VS_NEG_PDC_U   | 153 | 0.388473 | 1.27109 | 0.0482077 | 0.281152 | 1 | 2670 tags=22%, list=17%, signal=26% | 0.362616  | 1.20823   | 0.010224   | 0.419088  | 1     | 2609 tags=20%, list=16%, signal=24% |
| GSE20715_WT_VS_TLR4_KO_48H_OZ   | 174 | 0.382964 | 1.2701  | 0.0505549 | 0.283271 | 1 | 2841 tags=24%, list=18%, signal=28% | 0.333471  | 1.12785   | 0.19598    | 0.530431  | 1     | 2415 tags=24%, list=15%, signal=27% |
| GSE3982_NEUTROPHIL_VS_BASOPHIL  | 167 | 0.382279 | 1.26811 | 0.0573881 | 0.282621 | 1 | 3056 tags=31%, list=19%, signal=37% | 0.34224   | 1.14079   | 0.188679   | 0.510182  | 1     | 1988 tags=18%, list=12%, signal=20% |
| GSE17721_0.5H_VS_12H_POLYIC_BM  | 172 | 0.384447 | 1.26742 | 0.053616  | 0.289589 | 1 | 2720 tags=27%, list=17%, signal=33% | -0.24778  | -0.952911 | 0.65       | 0.762643  | 1     | 2195 tags=22%, list=14%, signal=25% |
| GSE15930_NAIVE_VS_48H_IN_VITRO  | 183 | 0.377399 | 1.26647 | 0.0550122 | 0.291758 | 1 | 3276 tags=31%, list=20%, signal=39% | 0.484283  | 1.64089   | 0          | 0.0680514 | 0.917 | 2790 tags=38%, list=17%, signal=45% |
| MITOCHONDRIAL_TRANSPORT         | 18  | 0.540529 | 1.26588 | 0.150974  | 0.292853 | 1 | 2268 tags=33%, list=14%, signal=39% | 0.651211  | 1.48606   | 0.0301109  | 0.137713  | 1     | 1994 tags=39%, list=12%, signal=44% |
| NEURON_DEVELOPMENT              | 55  | 0.438859 | 1.26579 | 0.132102  | 0.292558 | 1 | 766 tags=13%, list=5%, signal=13%   | 0.335602  | 0.987079  | 0.466113   | 0.752249  | 1     | 937 tags=9%, list=6%, signal=10%    |
| GSE17721_0.5H_VS_12H_LPS_BMDM   | 180 | 0.3799   | 1.26565 | 0.0542823 | 0.29244  | 1 | 2816 tags=26%, list=18%, signal=31% | -0.281954 | -1.08246  | 0.184615   | 0.543308  | 1     | 3414 tags=33%, list=21%, signal=42% |
| REGULATION_OF_ANATOMICAL_STR    | 23  | 0.517498 | 1.26511 | 0.148499  | 0.293376 | 1 | 2348 tags=30%, list=15%, signal=36% | 0.398288  | 0.986346  | 0.48189    | 0.750077  | 1     | 4330 tags=39%, list=27%, signal=54% |
| GSE24634_TREG_VS_TCONV_POST_D   | 163 | 0.383197 | 1.26428 | 0.0642317 | 0.295128 | 1 | 3131 tags=36%, list=20%, signal=44% | -0.286051 | -1.08562  | 0.204082   | 0.541455  | 1     | 2515 tags=30%, list=16%, signal=35% |
| GSE36476_CTRL_VS_TSS2_ACT_16H_1 | 182 | 0.38295  | 1.26359 | 0.0481481 | 0.296517 | 1 | 3163 tags=35%, list=20%, signal=43% | 0.416343  | 1.40642   | 0.00609013 | 0.18483   | 1     | 3987 tags=48%, list=25%, signal=64% |
| GSE360_L_DONOVANI_VS_L_MAJOR    | 176 | 0.378665 | 1.26251 | 0.0423412 | 0.29893  | 1 | 2277 tags=22%, list=14%, signal=26% | 0.364098  | 1.20614   | 0.0902256  | 0.404946  | 1     | 1546 tags=15%, list=10%, signal=16% |
| GSE28237_EARLY_VS_LATE_GC_BCEL  | 176 | 0.382551 | 1.26238 | 0.0501223 | 0.29877  | 1 | 2584 tags=20%, list=16%, signal=23% | -0.262109 | -1.00198  | 0.430052   | 0.652114  | 1     | 2806 tags=20%, list=17%, signal=24% |
| GSE360_DC_VS_MAC_B_MALAYI_HIG   | 176 | 0.382453 | 1.26198 | 0.0472727 | 0.299351 | 1 | 2709 tags=28%, list=17%, signal=33% | 0.396907  | 1.33509   | 0.0179257  | 0.255663  | 1     | 3199 tags=34%, list=20%, signal=42% |
| ANGIOGENESIS                    | 42  | 0.453524 | 1.26185 | 0.106667  | 0.299183 | 1 | 2077 tags=24%, list=13%, signal=27% | -0.298209 | -0.946176 | 0.534238   | 0.765933  | 1     | 2898 tags=29%, list=18%, signal=35% |
| RESPONSE_TO_ENDOGENOUS_STIMUL   | 185 | 0.377205 | 1.26168 | 0.0610048 | 0.299138 | 1 | 3194 tags=28%, list=20%, signal=35% | 0.34753   | 1.18511   | 0.127551   | 0.445744  | 1     | 2642 tags=30%, list=16%, signal=36% |
| GSE17721_CTRL_VS_GARDIQUIMOD_5  | 178 | 0.374663 | 1.2615  | 0.0383234 | 0.299168 | 1 | 3073 tags=23%, list=19%, signal=28% | 0.367903  | 1.25146   | 0.0556242  | 0.357082  | 1     | 2880 tags=29%, list=18%, signal=35% |
| NEURON_APOPTOSIS                | 15  | 0.56242  | 1.26134 | 0.147458  | 0.299101 | 1 | 3450 tags=53%, list=21%, signal=68% | 0.427349  | 0.952647  | 0.523569   | 0.784189  | 1     | 1994 tags=20%, list=12%, signal=23% |
| GSE15930_STIM_VS_STIM_AND_TRIC  | 173 | 0.379847 | 1.26119 | 0.0533499 | 0.298985 | 1 | 3129 tags=21%, list=19%, signal=26% | 0.357708  | 1.20201   | 0.108586   | 0.426946  | 1     | 3094 tags=24%, list=19%, signal=29% |
| GSE9988_ANTI_TREM1_VS_LPS_MON   | 167 | 0.378113 | 1.26099 | 0.0629454 | 0.299039 | 1 | 3673 tags=39%, list=23%, signal=50% | -0.249959 | -0.9603   | 0.609137   | 0.746815  | 1     | 2981 tags=28%, list=19%, signal=34% |
| DEFENSE_RESPONSE                | 226 | 0.37082  | 1.26092 | 0.0406977 | 0.298724 | 1 | 3327 tags=31%, list=21%, signal=39% | 0.342762  | 1.18054   | 0.110458   | 0.44962   | 1     | 3215 tags=27%, list=20%, signal=34% |
| CELL_CYCLE_ARREST_GO_0007050    | 52  | 0.441232 | 1.26085 | 0.10472   | 0.298416 | 1 | 2692 tags=31%, list=17%, signal=37% | 0.372908  | 1.07143   | 0.343931   | 0.621589  | 1     | 2549 tags=27%, list=16%, signal=32% |
| DOUBLE_STRAND_BREAK_REPAIR      | 23  | 0.502913 | 1.25998 | 0.156051  | 0.300306 | 1 | 2692 tags=35%, list=17%, signal=42% | 0.349488  | 0.872248  | 0.669381   | 0.891411  | 1     | 3135 tags=43%, list=20%, signal=54% |
| GSE3982_DC_VS_EFF_MEMORY_CD4    | 176 | 0.380166 | 1.25981 | 0.0526961 | 0.30021  | 1 | 3153 tags=34%, list=20%, signal=41% | 0.291302  | 0.978954  | 0.524652   | 0.762398  | 1     | 2420 tags=23%, list=15%, signal=27% |
| GSE3982_EOSINOPHIL_VS_MAST_CEL  | 167 | 0.380741 | 1.25895 | 0.060024  | 0.302212 | 1 | 3405 tags=28%, list=21%, signal=35% | 0.234472  | 0.786197  | 0.944584   | 0.967064  | 1     | 3014 tags=19%, list=19%, signal=23% |
| CATION_CHANNEL_ACTIVITY         | 100 | 0.399402 | 1.25875 | 0.0766129 | 0.302235 | 1 | 2735 tags=17%, list=17%, signal=20% | 0.407914  | 1.30181   | 0.0485021  | 0.284396  | 1     | 4126 tags=26%, list=16%, signal=35% |
| GSE7764_NKCELL_VS_SPLENOCYTE_D  | 179 | 0.376311 | 1.2587  | 0.0310408 | 0.301894 | 1 | 2386 tags=28%, list=15%, signal=32% | 0.324744  | 1.10385   | 0.239558   | 0.555677  | 1     | 2854 tags=28%, list=18%, signal=34% |
| CELL_PROJECTION                 | 99  | 0.400621 | 1.25869 | 0.0745098 | 0.301425 | 1 | 2235 tags=20%, list=14%, signal=23% | 0.406613  | 1.28639   | 0.0531335  | 0.306585  | 1     | 3993 tags=31%, list=25%, signal=41% |
| GSE22886_DC_VS_MONOCYTE_UP      | 174 | 0.380259 | 1.25862 | 0.0504202 | 0.301112 | 1 | 2469 tags=28%, list=15%, signal=32% | 0.456003  | 1.55154   | 0          | 0.103317  | 1     | 3350 tags=40%, list=21%, signal=50% |
| GSE27786_LSK_VS_ERYTHROBLAST_D  | 164 | 0.381977 | 1.25839 | 0.0679612 | 0.301261 | 1 | 1480 tags=13%, list=9%, signal=14%  | 0.261747  | 0.884077  | 0.746851   | 0.875125  | 1     | 3517 tags=20%, list=22%, signal=25% |
| GSE17721_POLYIC_VS_PAM3CSK4_8F  | 171 | 0.380301 | 1.25811 | 0.0669145 | 0.301493 | 1 | 2826 tags=25%, list=18%, signal=29% | 0.286444  | 0.961506  | 0.568123   | 0.774395  | 1     | 3164 tags=25%, list=20%, signal=31% |
| GSE13411_IGM_VS_SWITCHED_MEM    | 165 | 0.378119 | 1.25801 | 0.0631068 | 0.301241 | 1 | 3001 tags=30%, list=19%, signal=36% | -0.303536 | -1.16312  | 0.0646766  | 0.466148  | 1     | 2220 tags=29%, list=14%, signal=33% |
| GSE3982_BASOPHIL_VS_NKCELL_UP   | 161 | 0.380255 | 1.25771 | 0.0534101 | 0.301585 | 1 | 3028 tags=29%, list=19%, signal=36% | 0.295921  | 0.985152  | 0.571156   | 0.751156  | 1     | 3127 tags=29%, list=19%, signal=35% |
| PROTEIN_SERINE_THREONINE_PHOSF  | 20  | 0.528439 | 1.25734 | 0.166932  | 0.302051 | 1 | 2123 tags=40%, list=13%, signal=46% | -0.440629 | -1.12991  | 0.282722   | 0.47773   | 1     | 3671 tags=50%, list=23%, signal=65% |
| SH3_SH2_ADAPTOR_ACTIVITY        | 40  | 0.464533 | 1.25692 | 0.128593  | 0.302717 | 1 | 2792 tags=40%, list=17%, signal=48% | 0.39798   | 1.09462   | 0.323442   | 0.573383  | 1     | 2362 tags=30%, list=15%, signal=35% |
| GSE17721_CTRL_VS_PAM3CSK4_12H   | 175 | 0.376829 | 1.25488 | 0.059952  | 0.308047 | 1 | 3276 tags=28%, list=20%, signal=35% | 0.299979  | 1.00714   | 0.43609    | 0.732645  | 1     | 3210 tags=25%, list=20%, signal=30% |
| ION_BINDING                     | 238 | 0.364676 | 1.2541  | 0.0539273 | 0.309731 | 1 | 2885 tags=22%, list=18%, signal=27% | 0.265096  | 0.91827   | 0.678188   | 0.83118   | 1     | 3330 tags=24%, list=21%, signal=29% |
| GSE17721_4_VS_24H_GARDIQUIMOD   | 182 | 0.373622 | 1.25353 | 0.0584653 | 0.310876 | 1 | 2968 tags=27%, list=18%, signal=33% | 0.346203  | 1.16578   | 0.129697   | 0.472639  | 1     | 2923 tags=29%, list=18%, signal=35% |
| GSE17721_LPS_VS_PAM3CSK4_1H_BI  | 176 | 0.375588 | 1.25311 | 0.0581948 | 0.311501 | 1 | 2528 tags=24%, list=16%, signal=28% | 0.427348  | 1.44533   | 0.002442   | 0.157068  | 1     | 2903 tags=32%, list=18%, signal=38% |
| NEGATIVE_REGULATION_OF_GROWTH   | 39  | 0.459843 | 1.25311 | 0.132353  | 0.311    | 1 | 1922 tags=21%, list=12%, signal=23% | 0.408859  | 1.1128    | 0.299848   | 0.546827  | 1     | 2667 tags=28%, list=17%, signal=34% |
| GSE24634_IL4_VS_CTRL_TREATED_N  | 168 | 0.378499 | 1.25155 | 0.0679245 | 0.314989 | 1 | 2529 tags=23%, list=16%, signal=27% | 0.4009    | 1.34559   | 0.0173913  | 0.247379  | 1     | 2275 tags=26%, list=14%, signal=30% |
| IDENTICAL_PROTEIN_BINDING       | 276 | 0.365334 | 1.25139 | 0.0417607 | 0.314945 | 1 | 2794 tags=24%, list=17%, signal=28% | 0.323828  | 1.13208   | 0.521136   | 0.521136  | 1     | 2571 tags=22%, list=16%, signal=25% |
| GSE29615_CTRL_VS_DAY7_LAIV_FLU  | 140 | 0.38457  | 1.25125 | 0.075641  | 0.314853 | 1 | 962 tags=12%, list=6%, signal=13%   | 0.430832  | 1.42422   | 0.00256739 | 0.168573  | 1     | 1708 tags=15%, list=11%, signal=17% |
| DEPHOSPHORYLATION               | 60  | 0.403665 | 1.25085 | 0.128492  | 0.315475 | 1 | 2123 tags=30%, list=13%, signal=34% | 0.290522  | 0.795511  | 0.841077   | 0.959826  | 1     | 4027 tags=35%, list=15%, signal=47% |
| GSE27786_BCELL_VS_CD8_TCELL_UP  | 177 | 0.376222 | 1.25062 | 0.0484262 | 0.315638 | 1 | 2863 tags=29%, list=18%, signal=35% | 0.341965  | 1.15509   | 0.152625   | 0.486315  | 1     | 3033 tags=33%, list=19%, signal=41% |
| GSE17721_PAM3CSK4_VS_CPG_16H    | 170 | 0.37426  | 1.25052 | 0.054678  | 0.315391 | 1 | 2698 tags=25%, list=17%, signal=30% | -0.255362 | -0.97819  | 0.535714   | 0.703039  | 1     | 2131 tags=21%, list=13%, signal=23% |
| SYNAPSE                         | 23  | 0.504885 | 1.25025 | 0.161137  | 0.315617 | 1 | 1055 tags=22%, list=7%, signal=23%  | 0.598915  | 1.46461   | 0.0409165  | 0.146684  | 1     | 1208 tags=17%, list=8%, signal=19%  |
| GSE9988_ANTI_TREM1_VS_LOW_LPS   | 171 | 0.374987 | 1.24984 | 0.0539216 | 0.316283 | 1 | 3673 tags=37%, list=23%, signal=48% | 0.286645  | 0.972758  | 0.53607    | 0.771687  | 1     | 2203 tags=19%, list=14%, signal=22% |
| NERVOUS_SYSTEM_DEVELOPMENT      | 345 | 0.356299 | 1.24916 | 0.0297685 | 0.317702 | 1 | 3763 tags=23%, list=23%, signal=30% | 0.289654  | 1.03379   | 0.372483   | 0.691473  | 1     | 3283 tags=16%, list=20%, signal=20% |
| REGULATION_OF_PROTEIN_AMINO_A   | 29  | 0.485761 | 1.24903 | 0.140271  | 0.317533 | 1 | 3093 tags=34%, list=19%, signal=43% | 0.453195  | 1.15873   | 0.222037   | 0.483028  | 1     | 2837 tags=31%, list=18%, signal=38% |
| GSE17721_0.5H_VS_24H_POLYIC_BM  | 180 | 0.373292 | 1.2477  | 0.0799032 | 0.320804 | 1 | 3165 tags=31%, list=20%, signal=38% | 0.266637  | 0.905156  | 0.782625   | 0.847285  | 1     | 3469 tags=28%, list=22%, signal=35% |
| GSE17721_POLYIC_VS_PAM3CSK4_1F  | 180 | 0.378015 | 1.24735 | 0.0733496 | 0.321302 | 1 | 2603 tags=26%, list=16%, signal=30% | 0.351051  | 1.1852    | 0.121027   | 0.446127  | 1     | 2600 tags=24%, list=16%, signal=28% |
| GSE20366_CD103_POS_VS_CD103_KI  | 175 | 0.372887 | 1.24698 | 0.076537  | 0.321929 | 1 | 2398 tags=22%, list=15%, signal=25% | -0.297715 | -1.13947  | 0.102273   | 0.47131   | 1     | 2663 tags=25%, list=17%, signal=29% |
| GSE14769_UNSTIM_VS_360MIN_LPS   | 177 | 0.373163 | 1.24695 | 0.0550898 | 0.321491 | 1 | 3285 tags=29%, list=20%, signal=36% | 0.27669   | 0.942845  | 0.616891   | 0.797582  | 1     | 2804 tags=21%, list=17%, signal=26% |
| RESPONSE_TO_OTHER_ORGANISM      | 68  | 0.421926 | 1.24692 | 0.122392  | 0.321038 | 1 | 2184 tags=26%, list=14%, signal=31% | 0.455209  | 1.36876   | 0.044426   | 0.21733   | 1     | 2684 tags=34%, list=17%, signal=40% |
| GSE37416_OH_VS_GH_F_TULARENSIS  | 179 | 0.372784 | 1.24637 | 0.057783  | 0.322155 | 1 | 2687 tags=28%, list=17%, signal=34% | 0.316875  | 1.07331   | 0.289673   | 0.616545  | 1     | 2614 tags=27%, list=16%, signal=32% |
| NEURON_DIFFERENTIATION          |     |          |         |           |          |   |                                     |           |           |            |           |       |                                     |



Supplementary Table 3. Gene enrichment statistics for HD and control monkeys.

|                                   |     |          |         |           |          |   |                                     |           |           |            |           |       |                                     |
|-----------------------------------|-----|----------|---------|-----------|----------|---|-------------------------------------|-----------|-----------|------------|-----------|-------|-------------------------------------|
| GSE22886_NAIVE_VS_JGG_IGA_MEM     | 177 | 0.374613 | 1.24163 | 0.0660025 | 0.327194 | 1 | 3132 tags=32%, list=20%, signal=39% | 0.388667  | 1.31186   | 0.0283251  | 0.275726  | 1     | 2920 tags=34%, list=18%, signal=42% |
| GSE3982_NEUTROPHIL_VS_NKCELL_L    | 171 | 0.374503 | 1.24147 | 0.0713422 | 0.327149 | 1 | 3917 tags=42%, list=24%, signal=55% | 0.328011  | 1.10457   | 0.3282843  | 0.555167  | 1     | 2878 tags=32%, list=18%, signal=39% |
| POSITIVE_REGULATION_OF_RESPONS    | 36  | 0.460723 | 1.24142 | 0.150228  | 0.326759 | 1 | 2184 tags=31%, list=14%, signal=35% | 0.387912  | 1.05282   | 0.391437   | 0.65904   | 1     | 1061 tags=17%, list=7%, signal=18%  |
| GSE7460_TCONV_VS_TREG_THYMUS      | 183 | 0.371797 | 1.24083 | 0.0583232 | 0.327298 | 1 | 3322 tags=36%, list=21%, signal=45% | 0.255611  | 0.864655  | 0.809762   | 0.897478  | 1     | 3006 tags=25%, list=19%, signal=30% |
| MONOVALENT_INORGANIC_CATION_      | 84  | 0.40772  | 1.24069 | 0.103022  | 0.327819 | 1 | 3119 tags=24%, list=19%, signal=29% | 0.411874  | 1.28585   | 0.0695771  | 0.305155  | 1     | 4125 tags=25%, list=26%, signal=33% |
| GSE7852_TREG_VS_TCONV_THYMUS      | 182 | 0.372232 | 1.23961 | 0.0647572 | 0.330471 | 1 | 2791 tags=30%, list=17%, signal=36% | 0.263206  | 0.893424  | 0.745025   | 0.865199  | 1     | 3006 tags=25%, list=19%, signal=30% |
| NEGATIVE_REGULATION_OF_SIGNAL     | 33  | 0.479544 | 1.23957 | 0.153251  | 0.330055 | 1 | 2934 tags=42%, list=18%, signal=52% | 0.498427  | 1.32282   | 0.0952381  | 0.269236  | 1     | 3886 tags=45%, list=24%, signal=61% |
| GSE17721_LPS_VS_POLYIC_16H_BMC    | 175 | 0.372387 | 1.23954 | 0.0658683 | 0.329628 | 1 | 2587 tags=25%, list=16%, signal=30% | 0.371779  | 1.2566    | 0.0400102  | 0.347827  | 1     | 2674 tags=29%, list=17%, signal=34% |
| GSE17721_POLYIC_VS_CPG_2H_BMD     | 168 | 0.375869 | 1.23953 | 0.0584577 | 0.329141 | 1 | 3339 tags=28%, list=21%, signal=35% | 0.289782  | 0.973506  | 0.53325    | 0.770699  | 1     | 2235 tags=20%, list=14%, signal=23% |
| GSE9988_LOW_LPS_VS_CTRL_TREAT     | 170 | 0.373305 | 1.23943 | 0.0649819 | 0.328963 | 1 | 3285 tags=34%, list=20%, signal=42% | 0.313693  | 1.05993   | 0.3        | 0.643644  | 1     | 2474 tags=21%, list=15%, signal=25% |
| NEURITE_DEVELOPMENT               | 48  | 0.442572 | 1.23938 | 0.146893  | 0.328616 | 1 | 766 tags=13%, list=5%, signal=13%   | 0.304135  | 0.852643  | 0.717391   | 0.905245  | 1     | 937 tags=8%, list=6%, signal=9%     |
| GSE27786_CD8_TCELL_VS_ERYTHROE    | 168 | 0.373967 | 1.23931 | 0.0612745 | 0.328289 | 1 | 2620 tags=21%, list=16%, signal=25% | 0.249488  | 0.835555  | 0.855181   | 0.919239  | 1     | 2777 tags=17%, list=17%, signal=20% |
| BASAL_LAMINA                      | 18  | 0.542721 | 1.23928 | 0.168026  | 0.327859 | 1 | 2754 tags=33%, list=17%, signal=40% | -0.40875  | -1.03044  | 0.398417   | 0.610895  | 1     | 362 tags=17%, list=2%, signal=17%   |
| RESPONSE_TO_TEMPERATURE_STIMI     | 15  | 0.556259 | 1.23906 | 0.190397  | 0.328011 | 1 | 1140 tags=27%, list=7%, signal=29%  | -0.323613 | -0.78174  | 0.783163   | 0.99477   | 1     | 1817 tags=27%, list=11%, signal=30% |
| GSE31082_CD4_VS_CD8_SP_THYMO      | 170 | 0.373445 | 1.23902 | 0.0659062 | 0.32763  | 1 | 3207 tags=31%, list=20%, signal=39% | 0.336265  | 1.1352    | 0.190955   | 0.516436  | 1     | 2857 tags=24%, list=18%, signal=28% |
| POSITIVE_REGULATION_OF_CELL_PRC   | 139 | 0.375788 | 1.23844 | 0.0843829 | 0.328884 | 1 | 4395 tags=31%, list=27%, signal=42% | 0.315135  | 1.04256   | 0.365979   | 0.677986  | 1     | 2551 tags=22%, list=16%, signal=25% |
| MAPKKK_CASCADE_GO_0000165         | 98  | 0.399445 | 1.23836 | 0.109788  | 0.328575 | 1 | 1822 tags=18%, list=11%, signal=21% | 0.31585   | 1.01238   | 0.418555   | 0.727754  | 1     | 2452 tags=20%, list=15%, signal=24% |
| VOLTAGE_GATED_CHANNEL_ACTIVIT     | 61  | 0.423108 | 1.23836 | 0.113543  | 0.328085 | 1 | 1911 tags=16%, list=12%, signal=19% | 0.396229  | 1.18095   | 0.177004   | 0.448833  | 1     | 4614 tags=30%, list=29%, signal=41% |
| GSE29617_CTRL_VS_DAY7_TIV_FLU_1   | 168 | 0.372603 | 1.23829 | 0.0835381 | 0.327779 | 1 | 2497 tags=27%, list=16%, signal=32% | 0.511935  | 1.72177   | 0.0        | 0.0339847 | 0.552 | 2964 tags=43%, list=18%, signal=53% |
| GSE20366_EF_VIVO_VS_HOMEOSTAT     | 172 | 0.378109 | 1.23782 | 0.096577  | 0.328615 | 1 | 3067 tags=27%, list=19%, signal=33% | 0.359111  | 1.2237    | 0.0879080  | 0.398292  | 1     | 3535 tags=28%, list=22%, signal=36% |
| GSE9988_LPS_VS_LPS_AND_ANTI_TR    | 171 | 0.375042 | 1.23713 | 0.070529  | 0.330113 | 1 | 3673 tags=37%, list=23%, signal=47% | -0.317387 | -1.21482  | 0.0578947  | 0.406459  | 1     | 2022 tags=25%, list=13%, signal=28% |
| GSE14350_TREG_VS_TEFF_IN_IL2RB_   | 177 | 0.368114 | 1.23698 | 0.0844391 | 0.330067 | 1 | 1388 tags=16%, list=9%, signal=18%  | 0.406769  | 1.37158   | 0.0075188  | 0.21462   | 1     | 3300 tags=28%, list=21%, signal=35% |
| GSE7460_TCONV_VS_TREG_LN_UP       | 173 | 0.371742 | 1.23632 | 0.0736715 | 0.331439 | 1 | 3098 tags=30%, list=19%, signal=37% | -0.293128 | -1.12359  | 0.131455   | 0.486805  | 1     | 2742 tags=31%, list=17%, signal=37% |
| PROTEINACEOUS_EXTRACELLULAR_M     | 79  | 0.407757 | 1.23613 | 0.125344  | 0.331506 | 1 | 3112 tags=20%, list=19%, signal=25% | -0.255302 | -0.877544 | 0.757785   | 0.908302  | 1     | 3497 tags=23%, list=22%, signal=29% |
| INTRAMOLECULAR_OXIDOREDUCTAS      | 18  | 0.536623 | 1.23586 | 0.182266  | 0.331774 | 1 | 1180 tags=17%, list=7%, signal=18%  | 0.55818   | 1.30321   | 0.121795   | 0.284249  | 1     | 4875 tags=56%, list=30%, signal=80% |
| GSE20366_TREG_VS_NAIVE_CD4_TCE    | 180 | 0.369123 | 1.23554 | 0.0666667 | 0.332207 | 1 | 2358 tags=23%, list=15%, signal=27% | 0.262104  | 0.887315  | 0.751244   | 0.872546  | 1     | 1859 tags=16%, list=12%, signal=17% |
| GSE17721_LPS_VS_POLYIC_1H_BMD     | 177 | 0.375207 | 1.23501 | 0.0777778 | 0.333271 | 1 | 2348 tags=24%, list=15%, signal=28% | 0.258361  | 0.871627  | 0.808642   | 0.891088  | 1     | 4245 tags=34%, list=26%, signal=46% |
| GSE14769_UNSTIM_VS_60MIN_LPS_1    | 173 | 0.371024 | 1.23495 | 0.0711701 | 0.332932 | 1 | 2650 tags=34%, list=17%, signal=40% | 0.284315  | 0.953697  | 0.57888    | 0.78169   | 1     | 3200 tags=28%, list=20%, signal=34% |
| GSE7460_CTRL_VS_TGFB_TREATED_A    | 177 | 0.36799  | 1.23453 | 0.076087  | 0.333697 | 1 | 3285 tags=33%, list=20%, signal=41% | 0.393142  | 1.33386   | 0.0200501  | 0.258158  | 1     | 2777 tags=28%, list=17%, signal=34% |
| GSE19825_CD24LOW_VS_IL2RA_HIG     | 182 | 0.369192 | 1.23428 | 0.0744811 | 0.333894 | 1 | 3003 tags=31%, list=19%, signal=38% | 0.372778  | 1.26215   | 0.0407911  | 0.341638  | 1     | 3046 tags=32%, list=19%, signal=40% |
| ENZYME_REGULATOR_ACTIVITY         | 291 | 0.358536 | 1.23349 | 0.0421893 | 0.335825 | 1 | 3383 tags=26%, list=21%, signal=32% | 0.294032  | 1.03924   | 0.335632   | 0.682089  | 1     | 2591 tags=19%, list=16%, signal=23% |
| GSE26928_EFF_MEMORY_VS_CXCR5_     | 149 | 0.376736 | 1.23347 | 0.0732323 | 0.335339 | 1 | 3378 tags=30%, list=21%, signal=38% | 0.158233  | 1.70405   | 0.0        | 0.0427346 | 0.649 | 3574 tags=43%, list=25%, signal=57% |
| GSE2706_2H_VS_8H_R848_STIM_DC     | 164 | 0.373831 | 1.23336 | 0.0836408 | 0.335185 | 1 | 3421 tags=41%, list=21%, signal=52% | 0.410604  | 1.38103   | 0.00892557 | 0.205013  | 1     | 2440 tags=32%, list=15%, signal=38% |
| GSE13306_RA_VS_UNTREATED_TCON     | 179 | 0.368089 | 1.23327 | 0.0696821 | 0.334911 | 1 | 2626 tags=20%, list=16%, signal=24% | 0.243687  | 0.827289  | 0.906587   | 0.929088  | 1     | 1895 tags=11%, list=12%, signal=12% |
| PROTEIN_COMPLEX_BINDING           | 46  | 0.449329 | 1.23312 | 0.152367  | 0.334771 | 1 | 3615 tags=41%, list=23%, signal=53% | 0.434767  | 1.24036   | 0.126506   | 0.376509  | 1     | 1725 tags=22%, list=11%, signal=24% |
| GSE360_T_GONDI_VS_B_MALAYI_HI     | 179 | 0.368017 | 1.2331  | 0.0755396 | 0.334317 | 1 | 2687 tags=24%, list=17%, signal=29% | 0.273576  | 0.920757  | 0.665485   | 0.826663  | 1     | 1981 tags=18%, list=12%, signal=20% |
| GSE27786_CD4_VS_CD8_TCELL_UP      | 181 | 0.368776 | 1.23166 | 0.0805288 | 0.338197 | 1 | 3869 tags=38%, list=24%, signal=49% | -0.289936 | -1.11717  | 0.139175   | 0.490819  | 1     | 2621 tags=29%, list=16%, signal=35% |
| REGULATION_OF_CELL_PROLIFERATI    | 281 | 0.357252 | 1.23157 | 0.0538991 | 0.337943 | 1 | 3144 tags=23%, list=20%, signal=29% | 0.294832  | 1.03929   | 0.361305   | 0.682513  | 1     | 2551 tags=20%, list=16%, signal=23% |
| GSE24634_TEFF_VS_TCONV_DAY3_IN    | 171 | 0.366959 | 1.23108 | 0.0721154 | 0.338934 | 1 | 3153 tags=35%, list=20%, signal=42% | 0.284991  | 0.962647  | 0.545347   | 0.772645  | 1     | 2025 tags=20%, list=13%, signal=23% |
| GSE8515_CTRL_VS_IL1_4H_STIM_MA    | 161 | 0.371838 | 1.23097 | 0.0891566 | 0.338754 | 1 | 3811 tags=31%, list=24%, signal=40% | -0.294226 | -1.11899  | 0.152174   | 0.49118   | 1     | 1905 tags=21%, list=22%, signal=24% |
| ANATOMICAL_STRUCTURE_MORPHO       | 329 | 0.351498 | 1.2306  | 0.0332226 | 0.33932  | 1 | 3782 tags=23%, list=24%, signal=30% | 0.251702  | 0.887656  | 0.808036   | 0.872088  | 1     | 3517 tags=20%, list=12%, signal=25% |
| GSE2826_XID_VS_BTK_KO_BCELL_DN    | 173 | 0.369666 | 1.22988 | 0.0840438 | 0.340105 | 1 | 2562 tags=24%, list=16%, signal=29% | 0.34862   | 1.16276   | 0.16       | 0.478775  | 1     | 1092 tags=16%, list=7%, signal=17%  |
| GSE17721_12H_VS_24H_GARDIQUIM     | 181 | 0.370923 | 1.22968 | 0.0661939 | 0.341135 | 1 | 3401 tags=30%, list=21%, signal=38% | 0.338454  | 1.14923   | 0.173967   | 0.493671  | 1     | 3247 tags=28%, list=20%, signal=37% |
| POSITIVE_REGULATION_OF_PHOSPH     | 26  | 0.494768 | 1.22938 | 0.180952  | 0.341526 | 1 | 3093 tags=35%, list=19%, signal=43% | 0.373154  | 0.950557  | 0.524372   | 0.787095  | 1     | 2701 tags=35%, list=17%, signal=42% |
| GSE39820_IL1B_IL6_VS_IL1B_IL6_IL2 | 167 | 0.374779 | 1.22937 | 0.0838396 | 0.341049 | 1 | 3267 tags=28%, list=20%, signal=34% | 0.253193  | 0.854766  | 0.813381   | 0.950379  | 1     | 4536 tags=32%, list=28%, signal=45% |
| PROTEIN_FOLDING                   | 52  | 0.430891 | 1.22934 | 0.164265  | 0.340681 | 1 | 2387 tags=27%, list=15%, signal=32% | 0.454888  | 1.30941   | 0.0772595  | 0.274426  | 1     | 3055 tags=37%, list=19%, signal=45% |
| GSE360_I_DONOVANI_VS_T_GONDI      | 178 | 0.367118 | 1.22914 | 0.0863132 | 0.340746 | 1 | 2963 tags=29%, list=18%, signal=35% | 0.372666  | 1.26147   | 0.050367   | 0.340667  | 1     | 2879 tags=29%, list=18%, signal=35% |
| KAECN_DAY15_EFF_VS_MEMORY_CD      | 173 | 0.368949 | 1.229   | 0.0820265 | 0.340643 | 1 | 3620 tags=35%, list=23%, signal=44% | 0.353782  | 1.19047   | 0.125      | 0.439895  | 1     | 2551 tags=29%, list=16%, signal=34% |
| GSE17721_0_5H_VS_24H_GARDIQUIN    | 180 | 0.367486 | 1.22868 | 0.0810811 | 0.341114 | 1 | 2827 tags=26%, list=18%, signal=31% | -0.301882 | -1.16646  | 0.085      | 0.459088  | 1     | 2240 tags=27%, list=14%, signal=31% |
| GSE17974_IL4_AND_ANTI_IL12_VS_U   | 174 | 0.36554  | 1.22841 | 0.0876543 | 0.341432 | 1 | 3087 tags=27%, list=19%, signal=33% | -0.232235 | -0.887609 | 0.838221   | 0.891682  | 1     | 2926 tags=22%, list=18%, signal=27% |
| GSE17974_CTRL_VS_ACT_IL4_AND_A    | 168 | 0.367847 | 1.22817 | 0.0825123 | 0.341658 | 1 | 2638 tags=27%, list=16%, signal=32% | -0.341367 | -1.30419  | 0.00947867 | 0.353246  | 1     | 3293 tags=38%, list=21%, signal=47% |
| GSE17721_4H_VS_24H_POLYIC_BMD     | 175 | 0.370206 | 1.22773 | 0.0741627 | 0.342519 | 1 | 2788 tags=29%, list=17%, signal=35% | -0.279043 | -1.06818  | 0.556404   | 0.556404  | 1     | 2159 tags=23%, list=13%, signal=27% |
| GSE27786_LIN_NEG_VS_CD8_TCELL_1   | 178 | 0.366949 | 1.22704 | 0.0716846 | 0.343975 | 1 | 2861 tags=31%, list=18%, signal=38% | 0.366904  | 1.23551   | 0.0711656  | 0.382453  | 1     | 2466 tags=26%, list=15%, signal=30% |
| GSE17721_POLYIC_VS_GARDIQUIMOI    | 178 | 0.368323 | 1.22642 | 0.0725707 | 0.34543  | 1 | 2722 tags=28%, list=17%, signal=33% | 0.386769  | 1.31432   | 0.0259901  | 0.272278  | 1     | 2983 tags=29%, list=19%, signal=35% |
| KAECN_NAIVE_VS_DAY15_EFF_CD8_1    | 180 | 0.366513 | 1.22557 | 0.0769231 | 0.347589 | 1 | 3132 tags=31%, list=20%, signal=38% | 0.339306  | 1.14042   | 0.168539   | 0.511302  | 1     | 2926 tags=30%, list=18%, signal=36% |
| LIPID_CATABOLIC_PROCESS           | 34  | 0.466939 | 1.22551 | 0.16692   | 0.347273 | 1 | 1139 tags=21%, list=7%, signal=22%  | 0.4813    | 1.28265   | 0.139818   | 0.30771   | 1     | 2309 tags=24%, list=14%, signal=27% |
| CELLULAR_LIPID_CATABOLIC_PROCE    | 33  | 0.473784 | 1.22458 | 0.174962  | 0.349604 | 1 | 1139 tags=21%, list=7%, signal=23%  | 0.482035  | 1.27578   | 0.119935   | 0.31806   | 1     | 2309 tags=24%, list=14%, signal=28% |
| GSE7460_WT_VS_FOXP3_HET_ACT_V     | 171 | 0.368146 | 1.22418 | 0.0840544 | 0.35032  | 1 | 2382 tags=23%, list=15%, signal=26% | 0.320505  | 1.0801    | 0.260536   | 0.60246   | 1     | 2846 tags=24%, list=18%, signal=29% |
| GSE32423_MEMORY_VS_NAIVE_CD8      | 169 | 0.372493 | 1.22414 | 0.07875   | 0.349947 | 1 | 2686 tags=25%, list=17%, signal=30% | 0.395228  | 1.3233    | 0.0164957  | 0.269635  | 1     | 3393 tags=36%, list=21%, signal=45% |
| GSE9006_TYPE_1_VS_TYPE_2_DIABE    | 182 | 0.368355 | 1.22408 | 0.0801944 | 0.349607 | 1 | 4025 tags=36%, list=25%, signal=48% | -0.265294 | -1.01887  | 0.37037    | 0.625827  | 1     | 2453 tags=26%, list=15%, signal=30% |
| GSE20715_WT_VS_TLR4_KO_24H_OZ     | 174 | 0.367556 | 1.22382 | 0.0661765 | 0.349907 | 1 | 4342 tags=34%, list=27%, signal=47% | -0.233441 | -0.905719 | 0.851313   | 0.854413  | 1     | 3301 tags=26%, list=21%, signal=32% |
| GSE8868_SPLEEN_VS_INTESTINE_CD1   | 179 | 0.366341 | 1.22354 | 0.0660955 | 0.350273 | 1 | 2718 tags=26%, list=17%, signal=31% | 0.366123  | 1.22812   | 0.0606827  | 0.386808  | 1     | 3019 tags=31%, list=19%, signal=38% |
| GSE15930_STIM_VS_STIM_AND_TRIC    | 184 | 0.365191 | 1.22331 | 0.0885609 | 0.350516 | 1 | 2034 tags=24%, list=13%, signal=28% | 0.304768  | 1.03165   | 0.387833   | 0.696295  | 1     | 3048 tags=24%, list=19%, signal=29% |
| PROTEIN_HOMODIMERIZATION_ACTI     | 106 | 0.386646 | 1.22249 | 0.105528  | 0.352543 | 1 | 2772 tags=27%, list=17%, signal=33% | -0.280537 | -1.00936  | 0.403042   | 0.633698  | 1     | 1913 tags=21%, list=12%,            |

Supplementary Table 3. Gene enrichment statistics for HD and control monkeys.

|                                             |     |          |         |           |          |   |                                     |           |           |           |          |   |                                     |
|---------------------------------------------|-----|----------|---------|-----------|----------|---|-------------------------------------|-----------|-----------|-----------|----------|---|-------------------------------------|
| GSE17721_LPS_VS_GARDIQUIMOD_2               | 174 | 0.366103 | 1.21584 | 0.0744811 | 0.364795 | 1 | 3469 tags=30%, list=22%, signal=38% | 0.340846  | 1.14866   | 0.151292  | 0.493881 | 1 | 2266 tags=25%, list=14%, signal=28% |
| DNA_DEPENDENT_DNA_REPLICATION               | 49  | 0.431888 | 1.21547 | 0.161054  | 0.365507 | 1 | 3057 tags=33%, list=19%, signal=40% | 0.349938  | 1.00114   | 0.453757  | 0.740223 | 1 | 2237 tags=24%, list=14%, signal=28% |
| GSE17721_POLYIC_VS_GARDIQUIMOD              | 183 | 0.363753 | 1.21531 | 0.0844391 | 0.365477 | 1 | 3463 tags=32%, list=22%, signal=40% | 0.337079  | 1.14641   | 0.164366  | 0.497248 | 1 | 3337 tags=32%, list=21%, signal=40% |
| GSE17721_POLYIC_VS_CPG_6H_BMD               | 171 | 0.366912 | 1.21524 | 0.0948379 | 0.365206 | 1 | 2698 tags=25%, list=17%, signal=30% | 0.292865  | 0.984084  | 0.519656  | 0.752848 | 1 | 2567 tags=22%, list=16%, signal=26% |
| CELLULAR_MACROMOLECULE_CATAB                | 95  | 0.392708 | 1.21508 | 0.118121  | 0.365187 | 1 | 2092 tags=27%, list=13%, signal=31% | 0.315423  | 0.992184  | 0.474483  | 0.750599 | 1 | 2247 tags=21%, list=14%, signal=24% |
| GSE360_HIGH_DOSE_B_MALAYI_VS_I              | 176 | 0.36272  | 1.2147  | 0.0809816 | 0.365942 | 1 | 2174 tags=23%, list=14%, signal=27% | 0.307165  | 1.03821   | 0.377029  | 0.68488  | 1 | 2670 tags=27%, list=17%, signal=32% |
| GSE2706_R848_VS_R848_AND_LPS_E              | 148 | 0.373742 | 1.21425 | 0.089196  | 0.366816 | 1 | 3373 tags=32%, list=21%, signal=40% | 0.286503  | 0.951327  | 0.590452  | 0.785564 | 1 | 3108 tags=25%, list=19%, signal=31% |
| GSE17721_CPG_VS_GARDIQUIMOD_4               | 176 | 0.364518 | 1.21357 | 0.0866911 | 0.368435 | 1 | 3775 tags=35%, list=24%, signal=46% | 0.314598  | 1.05446   | 0.339024  | 0.65674  | 1 | 2926 tags=28%, list=18%, signal=34% |
| GSE17721_0.5H_VS_8H_LPS_BMDM                | 175 | 0.365249 | 1.21247 | 0.0877193 | 0.371354 | 1 | 2726 tags=25%, list=17%, signal=30% | -0.265508 | -1.01984  | 0.355932  | 0.62577  | 1 | 2181 tags=20%, list=14%, signal=23% |
| MICROTUBULE_MOTOR_ACTIVITY                  | 15  | 0.553173 | 1.21207 | 0.223317  | 0.37209  | 1 | 3608 tags=53%, list=22%, signal=69% | 0.553129  | 1.25125   | 0.179572  | 0.355542 | 1 | 3453 tags=53%, list=22%, signal=68% |
| GTPASE_ACTIVITY                             | 88  | 0.394792 | 1.21174 | 0.142668  | 0.372688 | 1 | 3101 tags=27%, list=19%, signal=34% | 0.376018  | 1.1694    | 0.165278  | 0.467235 | 1 | 2450 tags=27%, list=15%, signal=32% |
| GSE10856_CTRL_VS_TNFRSF6B_IN_M              | 145 | 0.369057 | 1.21169 | 0.0996264 | 0.372368 | 1 | 2915 tags=29%, list=18%, signal=35% | -0.240629 | -0.904499 | 0.74      | 0.857807 | 1 | 2952 tags=28%, list=18%, signal=34% |
| GSE360_L_DONOVANI_VS_T_GONDIH               | 172 | 0.365362 | 1.21094 | 0.105721  | 0.374186 | 1 | 3120 tags=27%, list=19%, signal=33% | 0.37218   | 1.25143   | 0.050444  | 0.356388 | 1 | 2525 tags=23%, list=16%, signal=27% |
| GSE17721_CTRL_VS_LPS_12H_BMDM               | 179 | 0.363226 | 1.21091 | 0.0978261 | 0.373786 | 1 | 2728 tags=26%, list=17%, signal=31% | 0.262064  | 0.879661  | 0.769988  | 0.882677 | 1 | 2957 tags=28%, list=18%, signal=34% |
| GSE17721_PAM3CSK4_VS_CPG_0.5H               | 182 | 0.362278 | 1.21055 | 0.0840237 | 0.374439 | 1 | 3150 tags=21%, list=20%, signal=26% | 0.273021  | 0.92644   | 0.664277  | 0.818574 | 1 | 3824 tags=27%, list=24%, signal=36% |
| GSE29618_LAI_VS_TIV_FLU_VACCIN              | 178 | 0.363435 | 1.21037 | 0.102815  | 0.374505 | 1 | 2950 tags=29%, list=18%, signal=35% | 0.318507  | 1.06763   | 0.315789  | 0.628597 | 1 | 1919 tags=26%, list=12%, signal=23% |
| GSE12845_IGD_NEG_BLOOD_VS_PRE               | 176 | 0.364559 | 1.20999 | 0.0801944 | 0.375233 | 1 | 2358 tags=23%, list=15%, signal=26% | 0.329688  | 1.11266   | 0.220297  | 0.546731 | 1 | 3286 tags=32%, list=20%, signal=40% |
| PROGRAMMED_CELL_DEATH                       | 405 | 0.342642 | 1.20956 | 0.0458515 | 0.376146 | 1 | 2502 tags=21%, list=16%, signal=25% | 0.336131  | 1.21103   | 0.0451045 | 0.415543 | 1 | 3297 tags=29%, list=21%, signal=35% |
| GSE17721_LPS_VS_POLYIC_6H_BMDM              | 179 | 0.364296 | 1.20922 | 0.0966981 | 0.376709 | 1 | 1761 tags=17%, list=11%, signal=19% | 0.287712  | 0.961194  | 0.571429  | 0.774369 | 1 | 2953 tags=34%, list=18%, signal=29% |
| GSE15930_NAIVE_VS_24H_IN_VITRO              | 181 | 0.36153  | 1.20921 | 0.0961298 | 0.376208 | 1 | 3299 tags=33%, list=21%, signal=41% | 0.396011  | 1.3414    | 0.0174782 | 0.250571 | 1 | 3362 tags=34%, list=21%, signal=43% |
| PROTEIN_DOMAIN_SPECIFIC_BINDING             | 64  | 0.415272 | 1.20895 | 0.155844  | 0.376569 | 1 | 3615 tags=47%, list=23%, signal=60% | 0.308559  | 0.917429  | 0.645255  | 0.832836 | 1 | 3560 tags=33%, list=22%, signal=42% |
| CELL_DIVISION                               | 17  | 0.529552 | 1.20802 | 0.229773  | 0.378993 | 1 | 2809 tags=41%, list=17%, signal=50% | 0.632969  | 1.49157   | 0.045977  | 0.135735 | 1 | 696 tags=29%, list=4%, signal=3%    |
| GROWTH                                      | 72  | 0.404632 | 1.20777 | 0.149441  | 0.379278 | 1 | 2366 tags=19%, list=15%, signal=23% | 0.344756  | 1.04014   | 0.372881  | 0.683897 | 1 | 2854 tags=25%, list=18%, signal=30% |
| GSE13411_NAIVE_VS_SWITCHED_ME               | 166 | 0.36501  | 1.20772 | 0.080292  | 0.37896  | 1 | 2975 tags=30%, list=19%, signal=37% | 0.389014  | 1.31712   | 0.0234151 | 0.270218 | 1 | 3257 tags=34%, list=20%, signal=43% |
| NEUROTRANSMITTER_BINDING                    | 48  | 0.431163 | 1.20733 | 0.178947  | 0.37966  | 1 | 1893 tags=13%, list=12%, signal=14% | 0.302497  | 0.863201  | 0.760408  | 0.898312 | 1 | 4042 tags=19%, list=25%, signal=25% |
| GSE17974_0H_VS_12H_IN_VITRO_AC              | 160 | 0.364651 | 1.20663 | 0.103118  | 0.381405 | 1 | 2911 tags=29%, list=18%, signal=36% | 0.265226  | 0.887754  | 0.73995   | 0.872313 | 1 | 2285 tags=21%, list=14%, signal=25% |
| METAL_ION_TRANSPORT                         | 102 | 0.386135 | 1.20613 | 0.146175  | 0.382535 | 1 | 3119 tags=24%, list=19%, signal=29% | 0.368351  | 1.17827   | 0.175     | 0.451839 | 1 | 4125 tags=24%, list=26%, signal=31% |
| GSE17721_LPS_VS_POLYIC_4H_BMDM              | 185 | 0.361236 | 1.20598 | 0.0953545 | 0.382546 | 1 | 3339 tags=31%, list=21%, signal=39% | 0.274529  | 0.932331  | 0.658088  | 0.807846 | 1 | 2881 tags=23%, list=18%, signal=27% |
| DI_TRI VALENT_INORGANIC_CATIC               | 18  | 0.513142 | 1.20598 | 0.209106  | 0.382038 | 1 | 1710 tags=33%, list=11%, signal=37% | 0.485281  | 1.1619    | 0.259868  | 0.480126 | 1 | 1853 tags=28%, list=12%, signal=31% |
| GSE17721_12H_VS_24H_POLYIC_BMI              | 180 | 0.365211 | 1.20587 | 0.0875912 | 0.381884 | 1 | 3666 tags=32%, list=23%, signal=41% | -0.241385 | -0.930481 | 0.736585  | 0.800537 | 1 | 1489 tags=16%, list=9%, signal=18%  |
| GSE6269_FLU_VS_STREP_AUREUS_IN              | 145 | 0.371025 | 1.20575 | 0.116603  | 0.381761 | 1 | 3305 tags=28%, list=21%, signal=35% | 0.326029  | 1.08346   | 0.280941  | 0.598684 | 1 | 3200 tags=26%, list=20%, signal=32% |
| GSE15659_NAIVE_CD4_TCELL_VS_NC              | 163 | 0.366562 | 1.20498 | 0.0902349 | 0.383671 | 1 | 4485 tags=33%, list=28%, signal=45% | 0.329108  | 1.10785   | 0.232472  | 0.719829 | 1 | 2702 tags=20%, list=17%, signal=23% |
| APOPTOSIS_GO                                | 404 | 0.341056 | 1.20463 | 0.0558598 | 0.384035 | 1 | 2502 tags=21%, list=16%, signal=25% | 0.337585  | 1.21339   | 0.0438695 | 0.414352 | 1 | 3297 tags=29%, list=21%, signal=36% |
| GSE37416_CTRL_VS_24H_F_TULAREN              | 177 | 0.360617 | 1.20446 | 0.0919118 | 0.384367 | 1 | 2648 tags=28%, list=16%, signal=33% | 0.255268  | 0.85798   | 0.825239  | 0.902225 | 1 | 3675 tags=32%, list=23%, signal=41% |
| GSE15659_NAIVE_VS_PTPRC_NEG_C1              | 151 | 0.366476 | 1.20394 | 0.107731  | 0.385541 | 1 | 3578 tags=30%, list=22%, signal=38% | 0.324773  | 1.07956   | 0.28866   | 0.602829 | 1 | 2086 tags=16%, list=13%, signal=18% |
| GSE18791_CTRL_VS_NEWCASTLE_VIR              | 161 | 0.36338  | 1.2037  | 0.0966184 | 0.385814 | 1 | 3170 tags=27%, list=20%, signal=34% | 0.237194  | 0.801807  | 0.93273   | 0.954127 | 1 | 3186 tags=22%, list=20%, signal=28% |
| GSE3982_BCELL_VS_CENT_MEMORY_DNA_REPAIR     | 159 | 0.365638 | 1.20341 | 0.104551  | 0.386245 | 1 | 3056 tags=30%, list=19%, signal=36% | 0.341618  | 1.13658   | 0.191781  | 0.51602  | 1 | 2782 tags=31%, list=17%, signal=37% |
| GSE360_CTRL_VS_L_DONOVANI_DC                | 182 | 0.360451 | 1.20292 | 0.101553  | 0.386889 | 1 | 3132 tags=26%, list=20%, signal=32% | 0.317207  | 1.07118   | 0.303329  | 0.621959 | 1 | 2991 tags=36%, list=19%, signal=44% |
| GSE17974_0H_VS_1H_IN_VITRO_ACT              | 173 | 0.361526 | 1.20196 | 0.114391  | 0.389447 | 1 | 2975 tags=34%, list=19%, signal=41% | 0.298422  | 1.00095   | 0.456853  | 0.739829 | 1 | 4069 tags=36%, list=25%, signal=48% |
| GSE29618_PDC_VS_MDC_DAY7_FLU                | 171 | 0.361209 | 1.20132 | 0.0972569 | 0.391055 | 1 | 3425 tags=35%, list=21%, signal=44% | 0.388526  | 1.31091   | 0.0239834 | 0.274482 | 1 | 1544 tags=25%, list=10%, signal=27% |
| GSE2706_UNSTIM_VS_2H_R848_DC                | 158 | 0.362696 | 1.20117 | 0.102628  | 0.390982 | 1 | 3289 tags=33%, list=20%, signal=41% | 0.388807  | 1.28459   | 0.062637  | 0.304958 | 1 | 2751 tags=31%, list=17%, signal=37% |
| TRANSPORT_VESICLE                           | 30  | 0.468388 | 1.20111 | 0.177979  | 0.390695 | 1 | 1539 tags=23%, list=10%, signal=26% | 0.338268  | 0.88496   | 0.647552  | 0.874177 | 1 | 1797 tags=20%, list=11%, signal=22% |
| GSE27786_CD8_TCELL_VS_NKCELL_D              | 170 | 0.362009 | 1.20092 | 0.120098  | 0.390764 | 1 | 3386 tags=34%, list=21%, signal=42% | 0.303358  | 1.02046   | 0.412639  | 0.709313 | 1 | 3213 tags=31%, list=20%, signal=39% |
| GSE24142_ADULT_VS_FETAL_DN3_TH              | 171 | 0.361722 | 1.2009  | 0.107905  | 0.390299 | 1 | 2296 tags=22%, list=14%, signal=26% | 0.306009  | 1.03428   | 0.375     | 0.691882 | 1 | 3042 tags=25%, list=19%, signal=30% |
| MYELOID_CELL_DIFFERENTIATION                | 33  | 0.463344 | 1.20048 | 0.207221  | 0.391138 | 1 | 2804 tags=27%, list=17%, signal=33% | -0.488596 | -1.40806  | 0.054755  | 0.301812 | 1 | 1971 tags=33%, list=12%, signal=38% |
| GSE27786_LSK_VS_BCELL_DN                    | 172 | 0.364811 | 1.20041 | 0.108537  | 0.390831 | 1 | 2889 tags=27%, list=18%, signal=32% | 0.278689  | 0.936539  | 0.623426  | 0.80286  | 1 | 2091 tags=19%, list=13%, signal=20% |
| REGULATION_OF_DEVELOPMENTAL_I_CELL_FRACTION | 409 | 0.339994 | 1.2004  | 0.0522876 | 0.390354 | 1 | 3526 tags=29%, list=22%, signal=37% | 0.314537  | 1.13258   | 0.12009   | 0.519806 | 1 | 3009 tags=25%, list=19%, signal=32% |
| GSE17721_LPS_VS_PAM3CSK4_8H_BI              | 179 | 0.359436 | 1.20023 | 0.0942178 | 0.390368 | 1 | 3230 tags=21%, list=20%, signal=26% | 0.321709  | 1.16516   | 0.0838852 | 0.474312 | 1 | 3275 tags=23%, list=20%, signal=28% |
| GSE3337_CTRL_VS_16H_IFNG_IN_CD              | 181 | 0.357766 | 1.20004 | 0.109726  | 0.389931 | 1 | 3499 tags=32%, list=22%, signal=41% | 0.230431  | 0.777882  | 0.969321  | 0.969321 | 1 | 3921 tags=35%, list=24%, signal=45% |
| CELLULAR_CATABOLIC_PROCESS                  | 193 | 0.35752  | 1.19975 | 0.0900585 | 0.390423 | 1 | 3380 tags=30%, list=21%, signal=37% | 0.284529  | 0.966686  | 0.531443  | 0.775318 | 1 | 3291 tags=26%, list=21%, signal=32% |
| GSE27786_CD4_TCELL_VS_ERYTHTRO              | 166 | 0.365824 | 1.19958 | 0.10754   | 0.390465 | 1 | 2092 tags=23%, list=13%, signal=26% | 0.328743  | 1.11074   | 0.203907  | 0.549738 | 1 | 2309 tags=21%, list=14%, signal=24% |
| REGULATION_OF_MULTICELLULAR_O               | 132 | 0.370264 | 1.19927 | 0.131105  | 0.39099  | 1 | 3059 tags=22%, list=19%, signal=27% | 0.250713  | 0.843239  | 0.853437  | 0.911968 | 1 | 3532 tags=23%, list=22%, signal=29% |
| GSE360_CTRL_VS_L_DONOVANI_MAK               | 175 | 0.36143  | 1.19925 | 0.104369  | 0.390558 | 1 | 2318 tags=20%, list=14%, signal=23% | 0.387567  | 1.2715    | 0.0446097 | 0.326542 | 1 | 2891 tags=23%, list=18%, signal=27% |
| GSE3982_BCELL_VS_BASOPHIL_DN                | 169 | 0.359667 | 1.19917 | 0.110701  | 0.3903   | 1 | 2686 tags=24%, list=17%, signal=29% | 0.272661  | 0.917015  | 0.682692  | 0.832707 | 1 | 3889 tags=33%, list=24%, signal=43% |
| MEMBRANE_BOUND_VESICLE                      | 106 | 0.378966 | 1.19911 | 0.143421  | 0.390034 | 1 | 2861 tags=27%, list=18%, signal=33% | -0.265709 | -1.01543  | 0.386139  | 0.625228 | 1 | 1843 tags=18%, list=11%, signal=21% |
| REGULATION_OF_RESPONSE_TO_STI               | 51  | 0.425503 | 1.19894 | 0.181688  | 0.39005  | 1 | 3142 tags=25%, list=20%, signal=31% | 0.41775   | 1.35242   | 0.0212766 | 0.238572 | 1 | 3389 tags=35%, list=21%, signal=44% |
| GSE360_CTRL_VS_B_MALAYI_HIGH_C              | 168 | 0.360702 | 1.19888 | 0.111247  | 0.38976  | 1 | 2433 tags=27%, list=15%, signal=32% | 0.345241  | 0.990399  | 0.451937  | 0.7424   | 1 | 1061 tags=12%, list=7%, signal=13%  |
| DI_TRI VALENT_INORGANIC_CATIC               | 26  | 0.46973  | 1.19817 | 0.2125    | 0.39149  | 1 | 3726 tags=30%, list=23%, signal=38% | 0.32852   | 1.10627   | 0.239544  | 0.554884 | 1 | 3402 tags=29%, list=21%, signal=37% |
| GSE36392_TYPE2_I_MYELOID_VS_EO              | 177 | 0.361615 | 1.19813 | 0.100245  | 0.391116 | 1 | 1743 tags=27%, list=11%, signal=30% | 0.426573  | 0.89168   | 0.339506  | 0.60212  | 1 | 2632 tags=30%, list=16%, signal=37% |
| GSE20366_EX_VIVO_VS_DEC205_CO               | 166 | 0.362739 | 1.19776 | 0.11195   | 0.391843 | 1 | 3540 tags=32%, list=22%, signal=41% | 0.234162  | 0.791511  | 0.384204  | 0.963339 | 1 | 3470 tags=31%, list=22%, signal=38% |
| GSE17721_LPS_VS_GARDIQUIMOD_2               | 181 | 0.357373 | 1.19747 | 0.112883  | 0.392241 | 1 | 2379 tags=23%, list=15%, signal=27% | -0.26631  | -1.01368  | 0.387755  | 0.624665 | 1 | 2270 tags=23%, list=14%, signal=26% |
| GSE18791_CTRL_VS_NEWCASTLE_VIR              | 140 | 0.37265  | 1.19685 | 0.103316  | 0.393753 | 1 | 2577 tags=23%, list=16%, signal=27% | -0.285955 | -1.11123  | 0.145946  | 0.50541  | 1 | 1635 tags=18%, list=10%, signal=20% |
| GSE15659_NONSUPPRESSIVE_TCELL               | 144 | 0.365644 | 1.19598 | 0.116816  | 0.396605 | 1 | 2706 tags=23%, list=17%, signal=27% | 0.357631  | 1.18006   | 0.135678  | 0.450015 | 1 | 3685 tags=26%, list=23%, signal=33% |
| GSE13485_DAY3_VS_DAY7_YF17D_V               | 173 | 0.359046 | 1.19587 | 0.100245  | 0.395897 | 1 | 3006 tags=26%, list=19%, signal=31% | 0.292071  | 0.956327  | 0.593631  | 0.7785   | 1 | 3133 tags=19%, list=20%, signal=24% |
| GSE9650_NAIVE_VS_EFF_CD8_TCELL              |     |          |         |           |          |   |                                     |           |           |           |          |   |                                     |

Supplementary Table 3. Gene enrichment statistics for HD and control monkeys.

|                                 |     |          |         |           |          |   |                                     |           |           |            |           |       |                                     |
|---------------------------------|-----|----------|---------|-----------|----------|---|-------------------------------------|-----------|-----------|------------|-----------|-------|-------------------------------------|
| CELLULAR_PROTEIN_CATABOLIC_PRO  | 51  | 0.419189 | 1.19041 | 0.186391  | 0.406326 | 1 | 3433 tags=45%, list=21%, signal=57% | 0.262603  | 0.767155  | 0.901903   | 0.973914  | 1     | 3317 tags=25%, list=21%, signal=32% |
| GSE17721_ALL_VS_24H_PAM3CSK4_I  | 173 | 0.357929 | 1.18988 | 0.130277  | 0.407584 | 1 | 3365 tags=29%, list=21%, signal=37% | 0.294099  | 1.00424   | 0.435961   | 0.738262  | 1     | 2297 tags=21%, list=14%, signal=25% |
| IMMUNE_SYSTEM_PROCESS           | 286 | 0.344    | 1.18946 | 0.0835267 | 0.408467 | 1 | 3203 tags=28%, list=20%, signal=34% | 0.309308  | 1.08976   | 0.240506   | 0.582631  | 1     | 2751 tags=27%, list=17%, signal=32% |
| GSE15659_NAIVE_VS_PTPRC_NEG_CI  | 171 | 0.358955 | 1.18928 | 0.0963855 | 0.408555 | 1 | 2255 tags=17%, list=14%, signal=20% | 0.267006  | 0.874541  | 0.746468   | 0.889347  | 1     | 2412 tags=17%, list=15%, signal=20% |
| GSE339_EX_VIVO_VS_IN_CULTURE_C  | 182 | 0.354615 | 1.18905 | 0.123926  | 0.408864 | 1 | 4074 tags=39%, list=25%, signal=52% | -0.25617  | -0.985775 | 0.489011   | 0.68442   | 1     | 2505 tags=26%, list=16%, signal=30% |
| GSE14350_IL2RB_KO_VS_WT_TREG_I  | 179 | 0.354697 | 1.18876 | 0.110706  | 0.409384 | 1 | 3423 tags=36%, list=21%, signal=46% | 0.335428  | 1.13102   | 0.195332   | 0.523522  | 1     | 2639 tags=25%, list=16%, signal=32% |
| GSE17721_CTRL_VS_CPG_24H_BMDM   | 177 | 0.360024 | 1.18868 | 0.119901  | 0.409184 | 1 | 1995 tags=19%, list=12%, signal=22% | 0.357316  | 1.20483   | 0.0938272  | 0.423934  | 1     | 3069 tags=26%, list=19%, signal=29% |
| GSE3982_EFF_MEMORY_CD4_TCELL    | 181 | 0.360236 | 1.18864 | 0.123153  | 0.408792 | 1 | 3867 tags=41%, list=24%, signal=53% | 0.432623  | 1.44922   | 0.00374065 | 0.152565  | 1     | 3296 tags=39%, list=21%, signal=49% |
| GSE36392_TYPE_2_MYELOID_VS_NEL  | 177 | 0.353756 | 1.18842 | 0.124542  | 0.408995 | 1 | 3113 tags=31%, list=19%, signal=38% | 0.408636  | 1.39009   | 0.00248447 | 0.200979  | 1     | 3037 tags=33%, list=19%, signal=41% |
| GSE26928_CENTR_MEMORY_VS_CXC    | 148 | 0.361631 | 1.18833 | 0.110834  | 0.408817 | 1 | 2110 tags=21%, list=13%, signal=24% | 0.253034  | 0.836251  | 0.845752   | 0.918238  | 1     | 2998 tags=21%, list=19%, signal=26% |
| PROTEIN_SECRETION               | 28  | 0.464064 | 1.18815 | 0.205564  | 0.408947 | 1 | 3134 tags=43%, list=20%, signal=53% | 0.51085   | 1.30961   | 0.117175   | 0.274697  | 1     | 2891 tags=36%, list=18%, signal=43% |
| GSE360_L_MAJOR_VS_T_GONDII_DC   | 167 | 0.35672  | 1.18797 | 0.126082  | 0.409041 | 1 | 3073 tags=22%, list=19%, signal=27% | 0.304772  | 1.02603   | 0.400507   | 0.702361  | 1     | 3898 tags=20%, list=24%, signal=27% |
| GSE27786_LSK_VS_NKTCCELL_UP     | 170 | 0.359614 | 1.1872  | 0.113664  | 0.411043 | 1 | 2852 tags=28%, list=18%, signal=34% | 0.31326   | 1.05594   | 0.328321   | 0.653282  | 1     | 2659 tags=24%, list=17%, signal=29% |
| GSE3982_EOSINOPHIL_VS_TH1_DN    | 180 | 0.359135 | 1.18674 | 0.122128  | 0.412006 | 1 | 3317 tags=33%, list=21%, signal=41% | 0.357612  | 1.19381   | 0.106487   | 0.433445  | 1     | 2484 tags=26%, list=15%, signal=31% |
| KAECX_NAIVE_VS_MEMORY_CD8_TC    | 177 | 0.356292 | 1.18673 | 0.116708  | 0.411521 | 1 | 3669 tags=38%, list=23%, signal=49% | 0.314312  | 1.0689    | 0.299754   | 0.626615  | 1     | 2606 tags=31%, list=16%, signal=36% |
| GSE17974_CTRL_VS_ACT_IL4_AND_A  | 173 | 0.35891  | 1.18627 | 0.113892  | 0.412593 | 1 | 3380 tags=37%, list=21%, signal=46% | 0.355155  | 1.18235   | 0.121019   | 0.446609  | 1     | 3440 tags=33%, list=21%, signal=41% |
| GSE26928_NAIVE_VS_CENT_MEMOR'   | 152 | 0.365777 | 1.18619 | 0.13375   | 0.412325 | 1 | 2481 tags=24%, list=15%, signal=28% | 0.364618  | 1.20069   | 0.103704   | 0.428161  | 1     | 3337 tags=35%, list=21%, signal=44% |
| PROTEIN_CATABOLIC_PROCESS       | 59  | 0.406086 | 1.18612 | 0.172462  | 0.412072 | 1 | 3433 tags=41%, list=21%, signal=52% | -0.247693 | -0.806891 | 0.953507   | 0.987518  | 1     | 3565 tags=37%, list=22%, signal=48% |
| GSE30962_ACUTE_VS_CHRONIC_LCM   | 177 | 0.356168 | 1.18599 | 0.126946  | 0.411977 | 1 | 2630 tags=31%, list=16%, signal=36% | -0.264944 | -1.023    | 0.349754   | 0.623726  | 1     | 2584 tags=30%, list=16%, signal=35% |
| GSE17721_CTRL_VS_LPS_6H_BMDM    | 176 | 0.356153 | 1.18589 | 0.115621  | 0.411799 | 1 | 3004 tags=30%, list=19%, signal=36% | 0.306632  | 1.04634   | 0.353383   | 0.672094  | 1     | 3419 tags=31%, list=21%, signal=39% |
| GSE17721_0.5H_VS_12H_CPG_BMDA   | 175 | 0.357213 | 1.18563 | 0.110577  | 0.412152 | 1 | 3733 tags=35%, list=23%, signal=45% | 0.35068   | 1.17722   | 0.132409   | 0.45376   | 1     | 2697 tags=29%, list=17%, signal=35% |
| GSE1432_1H_VS_6H_IFNG_MICROGL   | 169 | 0.359848 | 1.18563 | 0.126965  | 0.411658 | 1 | 3218 tags=30%, list=20%, signal=37% | 0.335723  | 1.13137   | 0.192162   | 0.522596  | 1     | 1698 tags=20%, list=11%, signal=22% |
| GSE9037_CTRL_VS_LPS_1H_STIM_BV  | 174 | 0.358338 | 1.18533 | 0.123021  | 0.412175 | 1 | 2697 tags=26%, list=17%, signal=31% | -0.301099 | -1.16004  | 0.0923913  | 0.499332  | 1     | 2692 tags=30%, list=17%, signal=36% |
| GSE360_L_DONOVANI_VS_B_MALAYI   | 179 | 0.35582  | 1.18527 | 0.113692  | 0.411895 | 1 | 2963 tags=28%, list=18%, signal=35% | 0.349005  | 1.18676   | 0.131547   | 0.443841  | 1     | 2204 tags=24%, list=14%, signal=28% |
| GSE17974_0H_VS_6H_IN_VITRO_ACT  | 153 | 0.362046 | 1.18468 | 0.126691  | 0.413401 | 1 | 1458 tags=20%, list=9%, signal=22%  | 0.288826  | 0.957826  | 0.585052   | 0.777566  | 1     | 2248 tags=22%, list=14%, signal=25% |
| EXCRETION                       | 31  | 0.450379 | 1.18443 | 0.224843  | 0.413706 | 1 | 2852 tags=23%, list=18%, signal=27% | 0.306025  | 0.791944  | 0.826687   | 0.963564  | 1     | 2241 tags=13%, list=14%, signal=15% |
| GSE14000_UNSTIM_VS_4H_LPS_DC_I  | 174 | 0.357814 | 1.18407 | 0.120669  | 0.414351 | 1 | 3186 tags=32%, list=20%, signal=40% | 0.269129  | 0.910289  | 0.760704   | 0.83909   | 1     | 4194 tags=37%, list=26%, signal=50% |
| GSE11057_EFF_MEM_VS_CENT_MEV    | 150 | 0.363677 | 1.18389 | 0.134663  | 0.414413 | 1 | 3183 tags=29%, list=20%, signal=36% | -0.329006 | -1.2451   | 0.0420561  | 0.384309  | 1     | 1938 tags=25%, list=12%, signal=28% |
| GSE8868_SPLEEN_VS_INTESTINE_CD1 | 175 | 0.357107 | 1.18341 | 0.129584  | 0.415445 | 1 | 3302 tags=33%, list=21%, signal=41% | 0.296171  | 1.00115   | 0.461823   | 0.740736  | 1     | 2297 tags=19%, list=14%, signal=22% |
| LIPID_TRANSPORTER_ACTIVITY      | 21  | 0.497075 | 1.18316 | 0.22335   | 0.415726 | 1 | 1420 tags=24%, list=9%, signal=26%  | 0.318084  | 0.769769  | 0.836834   | 0.974846  | 1     | 1235 tags=14%, list=8%, signal=15%  |
| GSE3982_NEUTROPHIL_VS_TH2_UP    | 167 | 0.356087 | 1.18243 | 0.129606  | 0.417551 | 1 | 3481 tags=31%, list=22%, signal=39% | 0.280803  | 0.941401  | 0.598027   | 0.799717  | 1     | 2695 tags=23%, list=17%, signal=27% |
| PHOSPHOLIPASE_C_ACTIVITY        | 15  | 0.527131 | 1.18227 | 0.227953  | 0.417626 | 1 | 4789 tags=40%, list=30%, signal=57% | 0.452781  | 1.01759   | 0.455446   | 0.712714  | 1     | 1677 tags=20%, list=10%, signal=22% |
| SMALL_GTPASE_MEDIATED_SIGNAL'   | 78  | 0.393478 | 1.18217 | 0.161379  | 0.417463 | 1 | 1368 tags=17%, list=9%, signal=18%  | 0.361356  | 1.11079   | 0.249311   | 0.550126  | 1     | 2628 tags=29%, list=16%, signal=35% |
| GSE27786_LSK_VS_CD8_TCELL_UP    | 166 | 0.355743 | 1.18161 | 0.141439  | 0.418802 | 1 | 2318 tags=25%, list=14%, signal=29% | 0.359272  | 1.19797   | 0.10125    | 0.432322  | 1     | 2771 tags=29%, list=17%, signal=35% |
| GSE11864_CSF1_VS_CSF1_IFNG_PAM  | 170 | 0.356344 | 1.18124 | 0.126082  | 0.419499 | 1 | 2975 tags=28%, list=19%, signal=34% | 0.349542  | 1.1728    | 0.141089   | 0.459833  | 1     | 2484 tags=22%, list=15%, signal=25% |
| GSE17974_0H_VS_6H_IN_VITRO_ACT  | 177 | 0.355314 | 1.18121 | 0.122981  | 0.419108 | 1 | 3210 tags=31%, list=20%, signal=38% | 0.359783  | 1.21741   | 0.0799508  | 0.407908  | 1     | 2831 tags=29%, list=18%, signal=35% |
| GSE13306_RA_VS_UNTREATED_TREG   | 174 | 0.358911 | 1.18016 | 0.114078  | 0.422112 | 1 | 3788 tags=33%, list=24%, signal=43% | 0.350681  | 1.18319   | 0.111786   | 0.447357  | 1     | 3873 tags=32%, list=24%, signal=41% |
| REGULATION_OF_PROTEIN_SECRETI   | 19  | 0.509754 | 1.17991 | 0.251623  | 0.422429 | 1 | 2711 tags=47%, list=17%, signal=57% | 0.50364   | 1.18317   | 0.226962   | 0.446751  | 1     | 2891 tags=37%, list=18%, signal=45% |
| GSE27786_LIN_NEG_VS_NKTCCELL_UP | 167 | 0.353907 | 1.17954 | 0.116193  | 0.423229 | 1 | 2783 tags=28%, list=17%, signal=34% | 0.354456  | 1.20339   | 0.113553   | 0.4255    | 1     | 2460 tags=23%, list=15%, signal=27% |
| GSE13493_CD4INTCD8PO5_VS_CD8P   | 178 | 0.353703 | 1.17924 | 0.122449  | 0.423781 | 1 | 2537 tags=22%, list=16%, signal=26% | 0.284553  | 0.966897  | 0.56282    | 0.775123  | 1     | 2992 tags=24%, list=19%, signal=29% |
| ORGANELLE_ORGANIZATION_AND_BI   | 423 | 0.334826 | 1.17799 | 0.0667384 | 0.427555 | 1 | 3266 tags=26%, list=20%, signal=32% | 0.312667  | 1.12904   | 0.13385    | 0.527098  | 1     | 2993 tags=26%, list=19%, signal=31% |
| LIPID_TRANSPORT                 | 27  | 0.463519 | 1.17798 | 0.216174  | 0.427086 | 1 | 1420 tags=22%, list=9%, signal=24%  | 0.32615   | 0.839515  | 0.721078   | 0.914764  | 1     | 1440 tags=19%, list=9%, signal=20%  |
| NEGATIVE_REGULATION_OF_TRANSL   | 22  | 0.47674  | 1.17732 | 0.231496  | 0.428776 | 1 | 2066 tags=27%, list=13%, signal=31% | 0.658309  | 1.63344   | 0.00938676 | 0.0645812 | 0.936 | 2711 tags=41%, list=17%, signal=40% |
| GTPASE_REGULATOR_ACTIVITY       | 112 | 0.370791 | 1.17696 | 0.153846  | 0.429488 | 1 | 1364 tags=16%, list=8%, signal=17%  | 0.267307  | 0.865076  | 0.777181   | 0.89692   | 1     | 3935 tags=31%, list=25%, signal=41% |
| GSE7460_FOXP3_MUT_VS_WT_ACT'    | 177 | 0.354006 | 1.17691 | 0.14746   | 0.429136 | 1 | 2937 tags=30%, list=18%, signal=36% | 0.278601  | 0.936848  | 0.630221   | 0.802407  | 1     | 2597 tags=21%, list=16%, signal=25% |
| GSE3982_BCELL_VS_TH2_UP         | 151 | 0.358986 | 1.17675 | 0.130208  | 0.429181 | 1 | 2734 tags=25%, list=17%, signal=29% | 0.312628  | 1.04258   | 0.367056   | 0.678492  | 1     | 2893 tags=30%, list=18%, signal=36% |
| GSE17721_0.5H_VS_8H_PAM3CSK4_I  | 173 | 0.35561  | 1.17664 | 0.123153  | 0.429044 | 1 | 2173 tags=21%, list=14%, signal=24% | 0.311637  | 1.05      | 0.349939   | 0.66392   | 1     | 2247 tags=22%, list=14%, signal=25% |
| GSE27786_LSK_VS_MONO_MAC_DN     | 177 | 0.356713 | 1.17662 | 0.138686  | 0.428581 | 1 | 2122 tags=18%, list=13%, signal=21% | 0.276619  | 0.934081  | 0.636248   | 0.806214  | 1     | 2476 tags=20%, list=15%, signal=24% |
| GSE3982_MAST_CELL_VS_CENT_MPH   | 178 | 0.356233 | 1.17637 | 0.122072  | 0.428891 | 1 | 2973 tags=29%, list=19%, signal=35% | 0.288431  | 0.970736  | 0.546482   | 0.773434  | 1     | 2668 tags=23%, list=17%, signal=27% |
| PROTEIN_AMINO_ACID_DEPHOSPHO    | 53  | 0.422693 | 1.17587 | 0.189802  | 0.43014  | 1 | 2123 tags=30%, list=13%, signal=35% | -0.25479  | -0.81678  | 0.981086   | 0.981086  | 1     | 3671 tags=36%, list=23%, signal=46% |
| GAMETE_GENERATION               | 91  | 0.378019 | 1.17576 | 0.164642  | 0.429986 | 1 | 2961 tags=23%, list=18%, signal=28% | 0.253499  | 0.80385   | 0.866561   | 0.953494  | 1     | 4179 tags=29%, list=26%, signal=38% |
| GSE2826_WT_VS_XID_BCELL_UP      | 183 | 0.353613 | 1.17519 | 0.118644  | 0.431448 | 1 | 3935 tags=32%, list=25%, signal=42% | 0.389984  | 1.31952   | 0.0232274  | 0.267972  | 1     | 3488 tags=36%, list=22%, signal=46% |
| PYROPHOSPHATASE_ACTIVITY        | 204 | 0.347578 | 1.17512 | 0.113501  | 0.43116  | 1 | 3101 tags=26%, list=19%, signal=32% | 0.326991  | 1.11711   | 0.201465   | 0.541831  | 1     | 3104 tags=28%, list=19%, signal=34% |
| SECRETORY GRANULE               | 16  | 0.519054 | 1.17499 | 0.241379  | 0.431125 | 1 | 3009 tags=38%, list=19%, signal=46% | 0.472578  | 1.07507   | 0.359746   | 0.612644  | 1     | 2459 tags=44%, list=15%, signal=52% |
| CYTOKINE_METABOLIC_PROCESS      | 41  | 0.432236 | 1.17454 | 0.22406   | 0.432076 | 1 | 3461 tags=41%, list=22%, signal=53% | 0.298312  | 0.812824  | 0.79351    | 0.944391  | 1     | 3488 tags=34%, list=22%, signal=44% |
| IMMUNE_RESPONSE                 | 206 | 0.348641 | 1.17442 | 0.116197  | 0.431921 | 1 | 3203 tags=29%, list=20%, signal=36% | 0.329664  | 1.12286   | 0.182254   | 0.533609  | 1     | 2751 tags=29%, list=17%, signal=34% |
| GSE3982_NKCELL_VS_TH2_UP        | 163 | 0.354784 | 1.17425 | 0.135338  | 0.431933 | 1 | 2741 tags=23%, list=17%, signal=27% | 0.251247  | 0.838427  | 0.867574   | 0.915805  | 1     | 3276 tags=23%, list=20%, signal=28% |
| GSE1448_CTRL_VS_ANTI_VALPHA2_D  | 175 | 0.353381 | 1.17377 | 0.133971  | 0.433125 | 1 | 3356 tags=29%, list=21%, signal=36% | 0.442613  | 1.484     | 0.00128535 | 0.138322  | 1     | 3362 tags=34%, list=21%, signal=43% |
| GSE29615_DAY3_VS_DAY7_LAIV_FLU  | 155 | 0.357324 | 1.17375 | 0.14321   | 0.432693 | 1 | 3052 tags=23%, list=19%, signal=28% | -0.299501 | -1.13669  | 0.138614   | 0.469989  | 1     | 2107 tags=23%, list=13%, signal=24% |
| GSE15930_NAIVE_VS_24H_IN_VITRO  | 182 | 0.352052 | 1.1736  | 0.119048  | 0.432739 | 1 | 3406 tags=32%, list=21%, signal=41% | 0.429392  | 1.45741   | 0.00120048 | 0.14861   | 1     | 3369 tags=27%, list=21%, signal=47% |
| GSE17721_PLYVIC_VS_CPG_4H_BMD   | 176 | 0.351249 | 1.17277 | 0.138182  | 0.435152 | 1 | 2794 tags=24%, list=17%, signal=29% | 0.357212  | 1.20526   | 0.0974106  | 0.424538  | 1     | 2171 tags=25%, list=14%, signal=29% |
| GSE339_CD8POS_VS_CD4CD8DN_DC    | 179 | 0.350323 | 1.17266 | 0.134734  | 0.435    | 1 | 3334 tags=31%, list=21%, signal=38% | 0.389929  | 1.32426   | 0.02133    | 0.268752  | 1     | 3200 tags=31%, list=20%, signal=39% |
| GSE17974_0H_VS_24H_IN_VITRO_AC  | 151 | 0.363177 | 1.17175 | 0.138365  | 0.437641 | 1 | 2638 tags=30%, list=16%, signal=35% | -0.256542 | -0.969048 | 0.514286   | 0.732319  | 1     | 2108 tags=20%, list=13%, signal=23% |
| GSE17974_IL4_AND_ANTI_IL12_VS_U | 142 | 0.362703 | 1.17173 | 0.146497  | 0.437204 | 1 | 3448 tags=32%, list=21%, signal=40% | 0.275044  | 0.913097  | 0.676056   | 0.83567   | 1     | 3746 tags=25%, list=23%, signal=30% |
| GSE3982_CTRL_VS_PMA_STIM_EOSIN  | 169 | 0.352313 | 1.17163 |           |          |   |                                     |           |           |            |           |       |                                     |

Supplementary Table 3. Gene enrichment statistics for HD and control monkeys.

12

|                                  |     |          |         |          |          |   |                                     |           |           |            |           |       |                                     |
|----------------------------------|-----|----------|---------|----------|----------|---|-------------------------------------|-----------|-----------|------------|-----------|-------|-------------------------------------|
| NUCLEOSIDE_TRIPHOSPHATASE_ACTI   | 190 | 0.346465 | 1.16681 | 0.126812 | 0.445651 | 1 | 2380 tags=22%, list=15%, signal=25% | 0.33673   | 1.13886   | 0.166605   | 0.512361  | 1     | 3104 tags=29%, list=19%, signal=35% |
| GSE39820_CTRL_VS_IL1B_IL6_CD4_TI | 173 | 0.352415 | 1.16624 | 0.133333 | 0.447081 | 1 | 3258 tags=31%, list=20%, signal=38% | 0.286699  | 0.966393  | 0.556116   | 0.774798  | 1     | 2449 tags=20%, list=15%, signal=25% |
| REGULATION_OF_MITOSIS            | 34  | 0.438179 | 1.16591 | 0.217968 | 0.447775 | 1 | 4258 tags=47%, list=27%, signal=64% | 0.470662  | 1.25203   | 0.146487   | 0.356888  | 1     | 2452 tags=35%, list=15%, signal=42% |
| CHROMOSOMERICENTRIC_REGION       | 29  | 0.449759 | 1.16564 | 0.234146 | 0.448211 | 1 | 3235 tags=38%, list=20%, signal=47% | 0.501695  | 1.28595   | 0.122449   | 0.305596  | 1     | 2412 tags=38%, list=15%, signal=45% |
| GSE9037_CTRL_VS_LPS_1H_STIM_BIV  | 169 | 0.349664 | 1.16536 | 0.14951  | 0.448679 | 1 | 2479 tags=21%, list=15%, signal=24% | 0.258604  | 0.869068  | 0.809227   | 0.893382  | 1     | 3154 tags=23%, list=20%, signal=28% |
| LIPID_METABOLIC_PROCESS          | 291 | 0.336982 | 1.16528 | 0.10702  | 0.448421 | 1 | 2991 tags=23%, list=19%, signal=27% | 0.352471  | 1.23895   | 0.0301275  | 0.377418  | 1     | 2682 tags=22%, list=17%, signal=26% |
| GSE14308_TH1_VS_INDUCED_TREG_I   | 170 | 0.350463 | 1.16492 | 0.152393 | 0.449203 | 1 | 2878 tags=25%, list=18%, signal=30% | -0.29857  | -1.14904  | 0.105505   | 0.468716  | 1     | 3009 tags=35%, list=19%, signal=42% |
| CATABOLIC_PROCESS                | 202 | 0.350087 | 1.16485 | 0.127962 | 0.448951 | 1 | 2092 tags=22%, list=13%, signal=25% | 0.320698  | 1.098     | 0.242462   | 0.565499  | 1     | 2309 tags=20%, list=14%, signal=23% |
| GSE20151_CTRL_VS_FUSOBACT_NUC    | 162 | 0.354475 | 1.16447 | 0.158093 | 0.449676 | 1 | 3296 tags=27%, list=21%, signal=33% | 0.355404  | 1.18509   | 0.11378    | 0.445138  | 1     | 3010 tags=25%, list=19%, signal=30% |
| GSE17721_12H_VS_24H_GARDIQUIM    | 178 | 0.34978  | 1.16447 | 0.136087 | 0.449273 | 1 | 2875 tags=27%, list=18%, signal=32% | 0.327912  | 1.09693   | 0.235294   | 0.567852  | 1     | 3506 tags=37%, list=22%, signal=47% |
| GSE17721_12H_VS_24H_PAM3CSKA     | 183 | 0.347177 | 1.16444 | 0.132121 | 0.448883 | 1 | 3276 tags=29%, list=20%, signal=36% | 0.334876  | 1.13807   | 0.179104   | 0.512855  | 1     | 2751 tags=28%, list=17%, signal=34% |
| RESPONSE_TO_VIRUS                | 42  | 0.429801 | 1.16423 | 0.222714 | 0.449051 | 1 | 1300 tags=24%, list=8%, signal=26%  | 0.457354  | 1.27163   | 0.112426   | 0.32697   | 1     | 2684 tags=36%, list=17%, signal=43% |
| GSE17974_CTRL_VS_ACT_IL4_AND_A   | 173 | 0.351102 | 1.16387 | 0.158477 | 0.449828 | 1 | 3210 tags=34%, list=20%, signal=42% | 0.45316   | 1.53093   | 0          | 0.110686  | 1     | 2608 tags=32%, list=16%, signal=38% |
| GSE22886_IGM_MEMORY_BCELL_VS     | 187 | 0.35077  | 1.16372 | 0.153941 | 0.449835 | 1 | 4053 tags=41%, list=25%, signal=54% | 0.420311  | 1.43512   | 0.00123305 | 0.163062  | 1     | 2567 tags=29%, list=16%, signal=35% |
| CHROMOSOME                       | 109 | 0.369043 | 1.16368 | 0.183805 | 0.449448 | 1 | 4131 tags=43%, list=26%, signal=58% | 0.388291  | 1.24569   | 0.0837696  | 0.366246  | 1     | 2666 tags=33%, list=17%, signal=29% |
| POSITIVE_REGULATION_OF_CATALYTI  | 151 | 0.352994 | 1.16341 | 0.16416  | 0.449979 | 1 | 3420 tags=26%, list=21%, signal=33% | 0.273483  | 0.91035   | 0.698734   | 0.839399  | 1     | 2549 tags=21%, list=16%, signal=24% |
| GSE20366_TREG_VS_NAIVE_CD4_TCE   | 171 | 0.352385 | 1.16313 | 0.148103 | 0.450426 | 1 | 3404 tags=27%, list=21%, signal=34% | 0.319866  | 1.07343   | 0.305795   | 0.616637  | 1     | 1880 tags=18%, list=12%, signal=20% |
| GSE14000_4H_VS_16H_LPS_DC_TRA    | 174 | 0.349873 | 1.16162 | 0.161483 | 0.450121 | 1 | 2764 tags=29%, list=17%, signal=34% | 0.345248  | 1.16741   | 0.152971   | 0.467981  | 1     | 3192 tags=32%, list=20%, signal=40% |
| GSE16755_CTRL_VS_IFNA_TREATED_I  | 165 | 0.352784 | 1.16159 | 0.150873 | 0.454695 | 1 | 2784 tags=30%, list=17%, signal=36% | -0.247124 | -0.952954 | 0.663551   | 0.7638    | 1     | 2484 tags=23%, list=15%, signal=27% |
| GSE14769_UNSTIM_VS_120MIN_LPS    | 187 | 0.347071 | 1.16145 | 0.145655 | 0.454692 | 1 | 1869 tags=29%, list=12%, signal=26% | 0.278259  | 0.946025  | 0.621723   | 0.792789  | 1     | 3488 tags=32%, list=22%, signal=40% |
| GSE3982_BASOPHIL_VS_TH2_DN       | 179 | 0.347848 | 1.16125 | 0.1367   | 0.454881 | 1 | 3044 tags=28%, list=19%, signal=34% | 0.394968  | 1.34136   | 0.0162297  | 0.249745  | 1     | 3814 tags=38%, list=24%, signal=49% |
| NEGATIVE_REGULATION_OF_CELL_PF   | 141 | 0.356191 | 1.16122 | 0.159006 | 0.454449 | 1 | 2988 tags=25%, list=19%, signal=30% | 0.298506  | 0.977249  | 0.522465   | 0.763751  | 1     | 2051 tags=17%, list=13%, signal=19% |
| GSE12845_IGD_NEG_BLOOD_VS_NAI    | 180 | 0.349432 | 1.16118 | 0.141791 | 0.454129 | 1 | 3141 tags=32%, list=20%, signal=39% | 0.420414  | 1.42788   | 0.00246609 | 0.16667   | 1     | 2021 tags=26%, list=19%, signal=30% |
| CYTOPLASMIC_MEMBRANE_BOUND       | 104 | 0.371993 | 1.16088 | 0.191235 | 0.454665 | 1 | 3142 tags=25%, list=20%, signal=31% | 0.407309  | 1.3023    | 0.0492746  | 0.283759  | 1     | 3389 tags=35%, list=21%, signal=44% |
| GSE17580_UNINFECTED_VS_S_MANS    | 175 | 0.349114 | 1.16078 | 0.158775 | 0.454493 | 1 | 3306 tags=34%, list=21%, signal=43% | 0.372093  | 1.25766   | 0.0625     | 0.347467  | 1     | 3058 tags=30%, list=19%, signal=37% |
| GSE17721_CPG_VS_GARDIQUIMOD      | 177 | 0.347943 | 1.16023 | 0.141304 | 0.455872 | 1 | 2744 tags=28%, list=17%, signal=33% | -0.276768 | -1.0472   | 0.29646    | 0.590615  | 1     | 2861 tags=28%, list=18%, signal=33% |
| LIPID_RAFT                       | 29  | 0.447291 | 1.15982 | 0.2496   | 0.45681  | 1 | 3675 tags=45%, list=23%, signal=58% | 0.370453  | 0.95697   | 0.195939   | 0.777884  | 1     | 3993 tags=41%, list=25%, signal=55% |
| GSE9988_ANTI_TREM1_VS_ANTI_TRE   | 159 | 0.349983 | 1.15963 | 0.150311 | 0.456961 | 1 | 2742 tags=28%, list=17%, signal=33% | 0.309881  | 1.04311   | 0.347222   | 0.678154  | 1     | 2717 tags=23%, list=17%, signal=27% |
| GSE63476_CTRL_VS_TSST_ACT_72H_I  | 172 | 0.349123 | 1.15956 | 0.157552 | 0.456731 | 1 | 3045 tags=31%, list=19%, signal=38% | -0.377538 | -1.45022  | 0.00507614 | 0.293845  | 1     | 2384 tags=37%, list=15%, signal=43% |
| GSE17974_0_5H_VS_72H_IL4_AND_A   | 172 | 0.352258 | 1.15902 | 0.166042 | 0.458054 | 1 | 2192 tags=23%, list=14%, signal=26% | -0.300763 | -1.15032  | 0.0959596  | 0.466153  | 1     | 2698 tags=30%, list=17%, signal=36% |
| GSE2706_R848_VS_R848_AND_LPS_E   | 159 | 0.352211 | 1.15901 | 0.16129  | 0.457587 | 1 | 1475 tags=16%, list=9%, signal=17%  | -0.234453 | -0.887767 | 0.830571   | 0.892362  | 1     | 3576 tags=30%, list=22%, signal=38% |
| GSE22886_CD8_VS_CD4_NAIVE_TCEL   | 151 | 0.353472 | 1.15892 | 0.158028 | 0.457384 | 1 | 2808 tags=25%, list=17%, signal=25% | 0.241637  | 0.807942  | 0.869051   | 0.94887   | 1     | 3178 tags=20%, list=20%, signal=25% |
| GSE1460_DP_VS_CD4_THYMOCYTE_I    | 170 | 0.347745 | 1.15838 | 0.151775 | 0.458735 | 1 | 3104 tags=27%, list=19%, signal=33% | 0.378289  | 1.26141   | 0.058477   | 0.340087  | 1     | 3294 tags=36%, list=21%, signal=45% |
| GSE15733_BM_VS_SPLEEN_MEMORY     | 179 | 0.345786 | 1.15835 | 0.153563 | 0.458324 | 1 | 2637 tags=27%, list=16%, signal=32% | 0.257092  | 0.864426  | 0.804938   | 0.897127  | 1     | 2349 tags=20%, list=15%, signal=23% |
| GSE2706_R848_VS_LPS_8H_STIM_DC   | 161 | 0.353218 | 1.15828 | 0.172781 | 0.458084 | 1 | 3414 tags=33%, list=21%, signal=41% | 0.257333  | 0.856826  | 0.812655   | 0.903695  | 1     | 2054 tags=17%, list=13%, signal=19% |
| NUCLEAR_ENVELOPE                 | 65  | 0.391757 | 1.15813 | 0.19464  | 0.458027 | 1 | 2927 tags=34%, list=18%, signal=41% | 0.424359  | 1.25727   | 0.162581   | 0.348005  | 1     | 2582 tags=31%, list=16%, signal=37% |
| GSE13485_DAY7_VS_DAY21_YF17D_I   | 166 | 0.352028 | 1.15801 | 0.162195 | 0.457965 | 1 | 3045 tags=30%, list=19%, signal=36% | 0.271709  | 0.919321  | 0.66125    | 0.829479  | 1     | 2551 tags=23%, list=16%, signal=28% |
| GSE17580_TREG_VS_TEFF_DN         | 181 | 0.348463 | 1.15761 | 0.143033 | 0.458853 | 1 | 3098 tags=33%, list=19%, signal=40% | 0.421362  | 1.41587   | 0.00502513 | 0.175189  | 1     | 2184 tags=29%, list=14%, signal=33% |
| GSE32423_IL7_VS_IL4_MEMORY_CDE   | 171 | 0.349312 | 1.15745 | 0.157767 | 0.458913 | 1 | 2256 tags=25%, list=14%, signal=28% | -0.27247  | -1.0349   | 0.531789   | 0.601809  | 1     | 2166 tags=22%, list=13%, signal=25% |
| GSE7460_FOXP3_MUT_VS_HET_ACT     | 179 | 0.347354 | 1.15729 | 0.143902 | 0.458934 | 1 | 1697 tags=16%, list=11%, signal=18% | 0.318314  | 1.07622   | 0.298993   | 0.609933  | 1     | 2640 tags=20%, list=16%, signal=24% |
| GSE22886_NAIVE_CD4_TCELL_VS_48H  | 185 | 0.345224 | 1.15724 | 0.158788 | 0.458631 | 1 | 3276 tags=29%, list=20%, signal=36% | 0.406225  | 1.38626   | 0.00619579 | 0.199578  | 1     | 2775 tags=31%, list=17%, signal=37% |
| GSE18791_UNSTIM_VS_NEWCATSLE     | 166 | 0.35161  | 1.15706 | 0.156642 | 0.458715 | 1 | 3434 tags=36%, list=21%, signal=46% | 0.310393  | 1.03411   | 0.38239    | 0.691914  | 1     | 2687 tags=29%, list=17%, signal=34% |
| APICOLATERAL_PLASMA_MEMBRANE     | 30  | 0.447395 | 1.15687 | 0.238853 | 0.458942 | 1 | 4704 tags=37%, list=29%, signal=52% | 0.295438  | 0.768289  | 0.839204   | 0.974092  | 1     | 2875 tags=13%, list=18%, signal=16% |
| GSE27786_LIN_NEG_VS_ERYTHROBLA   | 162 | 0.349921 | 1.15639 | 0.167089 | 0.460041 | 1 | 2272 tags=17%, list=14%, signal=20% | 0.334545  | 1.11795   | 0.208861   | 0.54094   | 1     | 2525 tags=17%, list=16%, signal=20% |
| PEPTIDIYL_TYROSINE_PHOSPHORYLAT  | 25  | 0.464022 | 1.15636 | 0.250742 | 0.459633 | 1 | 3093 tags=28%, list=19%, signal=35% | 0.302104  | 0.767708  | 0.841693   | 0.973775  | 1     | 573 tags=12%, list=4%, signal=12%   |
| NEGATIVE_REGULATION_OF_PROGRM    | 140 | 0.356668 | 1.1561  | 0.167929 | 0.460091 | 1 | 3607 tags=33%, list=22%, signal=42% | 0.401849  | 1.32465   | 0.0364583  | 0.26856   | 1     | 3459 tags=32%, list=22%, signal=41% |
| GSE22886_CD8_TCELL_VS_BCELL_NA   | 160 | 0.349536 | 1.156   | 0.174447 | 0.459951 | 1 | 3263 tags=31%, list=20%, signal=39% | 0.271345  | 0.908655  | 0.670823   | 0.840043  | 1     | 3914 tags=33%, list=24%, signal=43% |
| GSE14308_TH2_VS_TH1_UP           | 171 | 0.346226 | 1.15585 | 0.159905 | 0.459985 | 1 | 3543 tags=33%, list=22%, signal=42% | 0.292047  | 0.978113  | 0.526961   | 0.763296  | 1     | 3343 tags=30%, list=21%, signal=38% |
| GSE17580_TREG_VS_TEFF_UP         | 171 | 0.349026 | 1.1552  | 0.155748 | 0.461711 | 1 | 2714 tags=27%, list=17%, signal=32% | 0.370199  | 1.23698   | 0.506798   | 0.378845  | 1     | 3383 tags=32%, list=21%, signal=40% |
| GSE22886_UNSTIM_VS_STIM_MEMO     | 182 | 0.344492 | 1.1551  | 0.159367 | 0.461618 | 1 | 3086 tags=31%, list=19%, signal=38% | 0.391539  | 1.32156   | 0.0295203  | 0.267516  | 1     | 3942 tags=38%, list=25%, signal=50% |
| GSE15930_NAIVE_VS_72H_IN_VITRO   | 179 | 0.347968 | 1.15501 | 0.137805 | 0.461441 | 1 | 3299 tags=31%, list=21%, signal=39% | 0.440602  | 1.5019    | 0          | 0.128668  | 1     | 2572 tags=32%, list=16%, signal=38% |
| GSE17721_PAM3CSKA_VS_CPG_24H     | 181 | 0.343266 | 1.15495 | 0.16445  | 0.461127 | 1 | 2809 tags=25%, list=17%, signal=30% | -0.303528 | -1.15948  | 0.0833333  | 0.457027  | 1     | 2451 tags=23%, list=15%, signal=27% |
| GSE24634_NAIVE_CD4_TCELL_VS_DA   | 186 | 0.34592  | 1.15495 | 0.164466 | 0.460636 | 1 | 2714 tags=28%, list=17%, signal=33% | 0.480395  | 1.61577   | 0          | 0.0691047 | 0.976 | 2855 tags=37%, list=18%, signal=45% |
| GSE360_DC_VS_MAC_B_MALAYI_HIG    | 178 | 0.344378 | 1.15461 | 0.157509 | 0.46132  | 1 | 2613 tags=26%, list=16%, signal=31% | -0.237746 | -0.913407 | 0.800971   | 0.837031  | 1     | 1522 tags=17%, list=9%, signal=18%  |
| SYNAPTIC_TRANSMISSION            | 159 | 0.346461 | 1.15443 | 0.163391 | 0.461549 | 1 | 2772 tags=14%, list=17%, signal=17% | 0.224737  | 0.755135  | 0.980695   | 0.98091   | 1     | 3280 tags=12%, list=20%, signal=15% |
| TRANSFERASE_ACTIVITY_TRANSFERRI  | 106 | 0.364344 | 1.15434 | 0.183938 | 0.461349 | 1 | 3495 tags=28%, list=22%, signal=36% | 0.406739  | 1.3007    | 0.0488771  | 0.283604  | 1     | 3041 tags=24%, list=19%, signal=29% |
| GSE15659_TREG_VS_TCONV_DN        | 138 | 0.355938 | 1.15381 | 0.167296 | 0.462659 | 1 | 2653 tags=19%, list=17%, signal=22% | -0.270901 | -0.991246 | 0.492823   | 0.673546  | 1     | 2309 tags=20%, list=14%, signal=23% |
| GSE13484_UNSTIM_VS_YF17D_VACC    | 168 | 0.347532 | 1.1538  | 0.170552 | 0.462193 | 1 | 2851 tags=26%, list=18%, signal=32% | 0.276165  | 0.925625  | 0.635      | 0.819614  | 1     | 2026 tags=21%, list=13%, signal=24% |
| GSE15930_NAIVE_VS_48H_IN_VITRO   | 175 | 0.346967 | 1.15325 | 0.153656 | 0.463592 | 1 | 3341 tags=25%, list=21%, signal=31% | 0.29899   | 1.00087   | 0.453634   | 0.73955   | 1     | 1990 tags=18%, list=12%, signal=20% |
| CYTOPLASMIC_VESICLE              | 108 | 0.365618 | 1.15152 | 0.181575 | 0.469169 | 1 | 3142 tags=24%, list=20%, signal=30% | 0.386416  | 1.23901   | 0.1        | 0.378     | 1     | 3389 tags=33%, list=21%, signal=42% |
| GSE22886_TCELL_VS_BCELL_NAIVE_C  | 158 | 0.350444 | 1.15113 | 0.161132 | 0.470038 | 1 | 3316 tags=30%, list=21%, signal=37% | 0.294837  | 0.976499  | 0.538841   | 0.7638    | 1     | 3296 tags=29%, list=21%, signal=36% |
| GSE27786_CD4_TCELL_VS_NKCELL_I   | 180 | 0.344705 | 1.1511  | 0.156438 | 0.469679 | 1 | 2245 tags=22%, list=14%, signal=26% | -0.261925 | -1.01203  | 0.350515   | 0.62773   | 1     | 2762 tags=28%, list=17%, signal=34% |
| ENDOSOME                         | 64  | 0.385726 | 1.15023 | 0.228571 | 0.472205 | 1 | 2571 tags=23%, list=16%, signal=28% | 0.325813  | 0.966495  | 0.527046   | 0.774964  | 1     | 2443 tags=23%, list=15%, signal=28% |
| GSE10856_CTRL_VS_TNFRSF68_IN_M   | 159 | 0.348652 | 1.14995 | 0.163112 | 0.472678 | 1 | 3950 tags=36%, list=25%, signal=47% | 0.272573  | 0.909725  | 0.693367   | 0.838847  | 1     | 3681 tags=25%, list=23%, signal=32% |
| GSE31082_CD4_VS_CD8_SP_THYMOCI   | 173 | 0.344007 | 1.14    |          |          |   |                                     |           |           |            |           |       |                                     |

Supplementary Table 3. Gene enrichment statistics for HD and control monkeys.

13

|                                    |     |          |         |          |          |   |                                     |           |           |            |           |       |                                     |
|------------------------------------|-----|----------|---------|----------|----------|---|-------------------------------------|-----------|-----------|------------|-----------|-------|-------------------------------------|
| GSE17721_POLYIC_VS_PAM3CSK4_6F     | 182 | 0.342663 | 1.14589 | 0.179612 | 0.47863  | 1 | 3248 tags=29%, list=20%, signal=35% | 0.285004  | 0.967215  | 0.536765   | 0.776136  | 1     | 3940 tags=32%, list=25%, signal=42% |
| REGULATION_OF_PROGRAMMED_CE        | 320 | 0.330041 | 1.14577 | 0.122768 | 0.478547 | 1 | 3526 tags=30%, list=22%, signal=38% | 0.338053  | 1.19986   | 0.0668973  | 0.429781  | 1     | 2670 tags=24%, list=17%, signal=28% |
| REGULATION_OF_CYTOKINE_BIOSYNT     | 37  | 0.424922 | 1.14543 | 0.261076 | 0.479265 | 1 | 2830 tags=35%, list=18%, signal=43% | 0.307271  | 0.844888  | 0.725519   | 0.912969  | 1     | 3078 tags=32%, list=19%, signal=40% |
| GSE31082_DN_VS_CD8_SP_THYMOC       | 177 | 0.343458 | 1.14486 | 0.183475 | 0.480694 | 1 | 3526 tags=32%, list=22%, signal=41% | 0.287209  | 0.965629  | 0.547445   | 0.773817  | 1     | 2477 tags=21%, list=15%, signal=24% |
| CELLULAR_LOCALIZATION              | 334 | 0.32821  | 1.14484 | 0.116854 | 0.480235 | 1 | 3499 tags=30%, list=22%, signal=37% | 0.317382  | 1.13081   | 0.153584   | 0.523449  | 1     | 2919 tags=26%, list=18%, signal=31% |
| VESICLE                            | 111 | 0.361134 | 1.14473 | 0.19296  | 0.480144 | 1 | 3142 tags=24%, list=20%, signal=30% | 0.384965  | 1.23476   | 0.0993378  | 0.382878  | 1     | 3389 tags=33%, list=21%, signal=42% |
| GSE13411_NAIVE_VS_IGM_MEMORY       | 166 | 0.34765  | 1.14467 | 0.175245 | 0.47984  | 1 | 3290 tags=28%, list=20%, signal=35% | 0.290236  | 0.971338  | 0.1773426  | 0.773426  | 1     | 1954 tags=17%, list=12%, signal=20% |
| GSE3982_EOSINOPHIL_VS_DC_UP        | 170 | 0.345987 | 1.14466 | 0.173482 | 0.479365 | 1 | 3066 tags=25%, list=19%, signal=31% | 0.35795   | 1.19652   | 0.0978399  | 0.432579  | 1     | 3007 tags=27%, list=19%, signal=33% |
| NEGATIVE_REGULATION_OF_APOPTC      | 139 | 0.352894 | 1.1442  | 0.19603  | 0.480448 | 1 | 3607 tags=32%, list=22%, signal=41% | 0.406603  | 1.33303   | 0.0261519  | 0.259388  | 1     | 3459 tags=32%, list=22%, signal=41% |
| CYTOKINE_BIOSYNTHTIC_PROCESS       | 40  | 0.425208 | 1.14413 | 0.243402 | 0.480202 | 1 | 3461 tags=40%, list=22%, signal=51% | 0.302013  | 0.831182  | 0.759398   | 0.924302  | 1     | 3488 tags=35%, list=22%, signal=45% |
| GSE31082_DP_VS_CD4_SP_THYMOC       | 178 | 0.343489 | 1.14412 | 0.185819 | 0.479748 | 1 | 2803 tags=27%, list=17%, signal=32% | 0.30723   | 1.02651   | 0.985942   | 0.702321  | 1     | 4227 tags=40%, list=26%, signal=54% |
| GSE11057_EFF_MEM_VS_CENT_MEV       | 174 | 0.344456 | 1.14371 | 0.173285 | 0.480733 | 1 | 2630 tags=23%, list=16%, signal=27% | -0.236732 | -0.911065 | 0.815      | 0.842653  | 1     | 1692 tags=17%, list=11%, signal=18% |
| G1_S_TRANSITION_OF_MITOTIC_CEL     | 26  | 0.452251 | 1.14277 | 0.271357 | 0.483583 | 1 | 2835 tags=35%, list=18%, signal=42% | 0.414571  | 1.06469   | 0.339172   | 0.635233  | 1     | 2667 tags=46%, list=17%, signal=55% |
| GSE22886_TH1_VS_TH2_12H_ACT_UI     | 176 | 0.343787 | 1.14238 | 0.185592 | 0.4845   | 1 | 3379 tags=28%, list=21%, signal=36% | 0.299672  | 1.01099   | 0.430905   | 0.726771  | 1     | 1978 tags=16%, list=12%, signal=18% |
| INDUCTION_OF_APOPTOSIS_BY_INTR     | 21  | 0.477014 | 1.14207 | 0.267943 | 0.485134 | 1 | 1292 tags=19%, list=8%, signal=21%  | -0.398155 | -1.03317  | 0.366667   | 0.606123  | 1     | 1584 tags=24%, list=10%, signal=26% |
| GSE2706_R848_VS_R848_AND_LPS_2     | 147 | 0.355358 | 1.14154 | 0.184539 | 0.486579 | 1 | 2662 tags=21%, list=17%, signal=25% | 0.391173  | 1.30997   | 0.0377359  | 0.276093  | 1     | 3305 tags=28%, list=21%, signal=35% |
| GSE14308_TH2_VS_INDUCED_TREG_1     | 174 | 0.347014 | 1.14144 | 0.175373 | 0.486389 | 1 | 2739 tags=26%, list=17%, signal=32% | -0.251687 | -0.969694 | 0.594595   | 0.732729  | 1     | 3724 tags=35%, list=23%, signal=45% |
| GSE27786_LSK_VS_NKCELL_DN          | 165 | 0.34537  | 1.14143 | 0.179141 | 0.485938 | 1 | 3514 tags=35%, list=22%, signal=44% | -0.333735 | -1.27439  | 0.0186047  | 0.355752  | 1     | 1624 tags=22%, list=10%, signal=25% |
| GSE3982_CENT_MEMORY_CD4_TCELL      | 186 | 0.339797 | 1.1413  | 0.179141 | 0.485937 | 1 | 3248 tags=32%, list=20%, signal=39% | 0.478699  | 1.62737   | 0          | 0.0667606 | 0.95  | 2755 tags=34%, list=17%, signal=44% |
| GSE9988_ANTI_TREM1_VS_LOW_LPS      | 172 | 0.343472 | 1.14125 | 0.180825 | 0.485611 | 1 | 3291 tags=33%, list=21%, signal=41% | 0.309568  | 1.04303   | 0.367041   | 0.677297  | 1     | 3522 tags=34%, list=22%, signal=43% |
| PROTEIN_AMINO_ACID_O_LINKED_G      | 17  | 0.501946 | 1.14121 | 0.272583 | 0.485251 | 1 | 537 tags=24%, list=3%, signal=24%   | 0.50622   | 1.18273   | 0.236088   | 0.447767  | 1     | 275 tags=18%, list=2%, signal=18%   |
| GSE5463_CTRL_VS_DEXAMETHASON       | 178 | 0.343741 | 1.14114 | 0.170496 | 0.484985 | 1 | 2648 tags=23%, list=16%, signal=27% | -0.296431 | -1.14448  | 0.095      | 0.465141  | 1     | 2023 tags=24%, list=13%, signal=27% |
| GSE26669_DP_VS_CD8_TCELL_IN_IV     | 177 | 0.343639 | 1.14107 | 0.188957 | 0.484749 | 1 | 3019 tags=29%, list=19%, signal=35% | -0.309341 | -1.1934   | 0.0263158  | 0.428847  | 1     | 3372 tags=36%, list=21%, signal=45% |
| ESTABLISHMENT_OF_PROTEIN_LOCAI     | 168 | 0.342244 | 1.14028 | 0.177262 | 0.487118 | 1 | 3499 tags=32%, list=22%, signal=40% | 0.248393  | 0.832265  | 0.889706   | 0.923887  | 1     | 2909 tags=23%, list=18%, signal=28% |
| ORGAN_MORPHOGENESIS                | 122 | 0.358556 | 1.14007 | 0.219108 | 0.487422 | 1 | 3164 tags=22%, list=20%, signal=27% | 0.332022  | 1.08295   | 0.290978   | 0.599545  | 1     | 3490 tags=29%, list=22%, signal=34% |
| GSE10239_MEMORY_VS_DAY4_5_EFF      | 179 | 0.342189 | 1.14004 | 0.179177 | 0.487049 | 1 | 3274 tags=30%, list=20%, signal=37% | 0.282032  | 0.945231  | 0.611995   | 0.792398  | 1     | 2475 tags=23%, list=15%, signal=27% |
| GSE36476_CTRL_VS_TSS2_ACT_16H_1    | 188 | 0.338846 | 1.13989 | 0.163793 | 0.487057 | 1 | 3198 tags=29%, list=20%, signal=36% | 0.47381   | 1.61547   | 0.00123305 | 0.0680347 | 0.976 | 3414 tags=45%, list=21%, signal=57% |
| GSE17721_POLYIC_VS_GARDIQUIMOD     | 185 | 0.343193 | 1.13957 | 0.182254 | 0.487704 | 1 | 3747 tags=31%, list=23%, signal=40% | 0.28374   | 0.969716  | 0.546798   | 0.773797  | 1     | 2835 tags=24%, list=18%, signal=29% |
| GSE19825_NAIVE_VS_DAY3_EFF_CD8     | 176 | 0.342864 | 1.13932 | 0.187805 | 0.48811  | 1 | 3611 tags=18%, list=22%, signal=22% | 0.201504  | 0.678646  | 1          | 0.99508   | 1     | 2943 tags=10%, list=18%, signal=12% |
| GSE17721_CTRL_VS_CPG_1H_BMDM       | 179 | 0.343297 | 1.13928 | 0.187042 | 0.487744 | 1 | 3143 tags=22%, list=20%, signal=27% | 0.282315  | 0.95182   | 0.605135   | 0.785936  | 1     | 3337 tags=21%, list=21%, signal=27% |
| GSE3982_MAST_CELL_VS_TH1_DN        | 175 | 0.343161 | 1.13923 | 0.18     | 0.487417 | 1 | 3671 tags=30%, list=23%, signal=39% | 0.400038  | 1.34566   | 0.0199253  | 0.248148  | 1     | 3003 tags=29%, list=19%, signal=35% |
| GSE22886_NAIVE_CD4_TCELL_VS_12I    | 185 | 0.339926 | 1.13877 | 0.189222 | 0.488912 | 1 | 3978 tags=41%, list=25%, signal=53% | 0.386301  | 1.31756   | 0.0280589  | 0.270738  | 1     | 3716 tags=30%, list=23%, signal=49% |
| GSE3982_DC_VS_TH2_DN               | 181 | 0.341558 | 1.13848 | 0.194976 | 0.489185 | 1 | 3047 tags=25%, list=19%, signal=31% | 0.410535  | 1.38945   | 0.00252207 | 0.199435  | 1     | 1747 tags=25%, list=11%, signal=28% |
| RECEPTOR_COMPLEX                   | 51  | 0.403958 | 1.13827 | 0.254386 | 0.489419 | 1 | 2918 tags=31%, list=18%, signal=38% | 0.353482  | 1.01845   | 0.42618    | 0.711245  | 1     | 2840 tags=27%, list=18%, signal=33% |
| GSE360_L_MAJOR_VS_B_MALAYI_LO      | 180 | 0.344991 | 1.13822 | 0.173145 | 0.489086 | 1 | 3104 tags=26%, list=19%, signal=32% | 0.327735  | 1.1064    | 0.2189     | 0.555497  | 1     | 3109 tags=26%, list=19%, signal=31% |
| GSE36476_CTRL_VS_TSS2_ACT_16H_1    | 170 | 0.34528  | 1.13786 | 0.180941 | 0.489851 | 1 | 3458 tags=32%, list=22%, signal=40% | -0.345472 | -1.31099  | 0.0233645  | 0.343151  | 1     | 2890 tags=33%, list=18%, signal=40% |
| GSE3982_MEMORY_CD4_TCELL_VS_E      | 169 | 0.341667 | 1.13718 | 0.181024 | 0.491784 | 1 | 3461 tags=28%, list=22%, signal=36% | -0.363866 | -1.38476  | 0.00526316 | 0.293936  | 1     | 2018 tags=25%, list=13%, signal=28% |
| ADHERENS_JUNCTION                  | 22  | 0.478656 | 1.13671 | 0.282297 | 0.49304  | 1 | 3422 tags=41%, list=21%, signal=52% | 0.566352  | 1.39215   | 0.0751421  | 0.199139  | 1     | 914 tags=14%, list=6%, signal=14%   |
| GSE39820_IL1B_IL6_VS_IL18_IL6_IL2: | 173 | 0.342199 | 1.13668 | 0.195954 | 0.492652 | 1 | 2572 tags=21%, list=16%, signal=25% | 0.288679  | 0.968187  | 0.545191   | 0.77591   | 1     | 3116 tags=25%, list=19%, signal=31% |
| REGULATION_OF_APOPTOSIS            | 319 | 0.328271 | 1.13666 | 0.14877  | 0.492224 | 1 | 3526 tags=30%, list=22%, signal=37% | 0.339734  | 1.20369   | 0.0553672  | 0.426506  | 1     | 2670 tags=24%, list=17%, signal=28% |
| EXTRACELLULAR_MATRIX_PART          | 45  | 0.406309 | 1.13651 | 0.24539  | 0.492228 | 1 | 4295 tags=33%, list=27%, signal=45% | -0.308527 | -0.94711  | 0.067238   | 0.767238  | 1     | 1108 tags=11%, list=7%, signal=12%  |
| GSE7460_TREG_VS_TCONV_ACT_UP       | 175 | 0.338654 | 1.136   | 0.174603 | 0.493669 | 1 | 3350 tags=35%, list=21%, signal=44% | 0.282995  | 0.958461  | 0.564356   | 0.77746   | 1     | 3401 tags=30%, list=21%, signal=38% |
| DNA_INTEGRITY_CHECKPOINT           | 21  | 0.469287 | 1.1359  | 0.277603 | 0.493515 | 1 | 3979 tags=57%, list=25%, signal=76% | 0.516214  | 1.26452   | 0.557795   | 0.337955  | 1     | 2119 tags=33%, list=13%, signal=38% |
| GSE360_L_DONOVANI_VS_L_MAJOR       | 166 | 0.343471 | 1.13562 | 0.194067 | 0.494054 | 1 | 2673 tags=23%, list=17%, signal=28% | 0.253646  | 0.85114   | 0.83625    | 0.906915  | 1     | 2392 tags=16%, list=15%, signal=18% |
| REGULATION_OF_DEFENSE_RESPONS      | 17  | 0.497474 | 1.13525 | 0.286195 | 0.494943 | 1 | 721 tags=24%, list=4%, signal=25%   | -0.478641 | -1.9535   | 0.199525   | 0.429691  | 1     | 1325 tags=18%, list=8%, signal=19%  |
| GSE7460_TCONV_VS_TREG_THYMUS       | 176 | 0.341033 | 1.13497 | 0.190535 | 0.495426 | 1 | 2686 tags=24%, list=17%, signal=29% | -0.385689 | -1.48677  | 0          | 0.319132  | 1     | 2965 tags=34%, list=18%, signal=41% |
| GSE360_L_MAJOR_VS_B_MALAYI_HI      | 173 | 0.343017 | 1.1349  | 0.182609 | 0.495205 | 1 | 2692 tags=27%, list=17%, signal=32% | 0.26882   | 0.903531  | 0.702539   | 0.849538  | 1     | 2737 tags=21%, list=17%, signal=25% |
| GSE10239_NAIVE_VS_KLRG1INT_EFF     | 175 | 0.339483 | 1.13461 | 0.188192 | 0.495786 | 1 | 3104 tags=29%, list=19%, signal=35% | 0.333663  | 1.1261    | 0.203474   | 0.534637  | 1     | 3696 tags=33%, list=23%, signal=43% |
| GSE1448_ANTI_VALPHA2_VS_VBETA5     | 177 | 0.342604 | 1.13444 | 0.198538 | 0.495931 | 1 | 3308 tags=30%, list=21%, signal=37% | -0.239012 | -0.927362 | 0.707447   | 0.803195  | 1     | 2934 tags=27%, list=18%, signal=32% |
| GSE24081_CONTROLLER_VS_PROGRE      | 176 | 0.34081  | 1.13413 | 0.190821 | 0.496586 | 1 | 2686 tags=26%, list=17%, signal=30% | 0.293331  | 0.995189  | 0.478632   | 0.746145  | 1     | 2070 tags=19%, list=13%, signal=22% |
| BIOPOLYMER_CATABOLIC_PROCESS       | 102 | 0.362513 | 1.13399 | 0.215762 | 0.49659  | 1 | 3450 tags=34%, list=21%, signal=43% | 0.277185  | 0.875481  | 0.744536   | 0.889307  | 1     | 3422 tags=32%, list=21%, signal=43% |
| GSE7400_CTRL_VS_CSF3_IN_VIVO_TF    | 163 | 0.344081 | 1.13394 | 0.188264 | 0.496281 | 1 | 2629 tags=23%, list=16%, signal=27% | 0.366588  | 1.21965   | 0.086547   | 0.404361  | 1     | 3754 tags=32%, list=23%, signal=35% |
| GSE360_DC_VS_MAC_M_TUBERCUL        | 176 | 0.341759 | 1.13375 | 0.194067 | 0.496474 | 1 | 2835 tags=24%, list=18%, signal=29% | -0.301252 | -1.14504  | 0.12       | 0.46697   | 1     | 2010 tags=27%, list=13%, signal=30% |
| PROTEIN_TYROSINE_PHOSPHATASE_J     | 44  | 0.411101 | 1.13372 | 0.25     | 0.496074 | 1 | 2256 tags=30%, list=14%, signal=34% | -0.289833 | -0.89907  | 0.670554   | 0.871025  | 1     | 3029 tags=27%, list=19%, signal=34% |
| GSE17721_CTRL_VS_GARDIQUIMOD_      | 170 | 0.342132 | 1.13366 | 0.197287 | 0.4958   | 1 | 3279 tags=25%, list=20%, signal=31% | -0.225781 | -0.881023 | 0.893401   | 0.903125  | 1     | 3029 tags=23%, list=19%, signal=28% |
| ESTABLISHMENT_OF_CELLULAR_LOCI     | 317 | 0.342784 | 1.13353 | 0.142064 | 0.495797 | 1 | 3499 tags=30%, list=22%, signal=38% | 0.321483  | 1.14509   | 0.139562   | 0.501153  | 1     | 2919 tags=27%, list=18%, signal=32% |
| GSE9006_TYPE_1_DIABETES_AT_DX_1    | 177 | 0.340745 | 1.13342 | 0.191932 | 0.495691 | 1 | 3025 tags=31%, list=19%, signal=37% | 0.460471  | 1.53939   | 0.00123762 | 0.109355  | 1     | 2967 tags=41%, list=18%, signal=49% |
| GSE17721_0_5H_VS_12H_LPS_BMDM      | 178 | 0.338438 | 1.133   | 0.187113 | 0.496698 | 1 | 3864 tags=33%, list=24%, signal=43% | 0.270313  | 0.915811  | 0.657635   | 0.833868  | 1     | 3152 tags=26%, list=20%, signal=32% |
| INTERMEDIATE_FILAMENT_CYTOSKEL     | 22  | 0.463073 | 1.13228 | 0.283228 | 0.4988   | 1 | 4035 tags=23%, list=25%, signal=30% | -0.338023 | -0.881505 | 0.660326   | 0.904629  | 1     | 435 tags=9%, list=3%, signal=9%     |
| GSE17721_PAM3CSK4_VS_GADIQUIV      | 178 | 0.341974 | 1.13222 | 0.203907 | 0.4985   | 1 | 2853 tags=26%, list=18%, signal=32% | 0.262735  | 0.88845   | 0.738594   | 0.871365  | 1     | 2684 tags=22%, list=17%, signal=26% |
| GSE17974_IL4_AND_ANTI_IL2_VS_U     | 136 | 0.34949  | 1.13181 | 0.190898 | 0.499548 | 1 | 3652 tags=30%, list=23%, signal=39% | 0.354741  | 1.15482   | 0.183117   | 0.485439  | 1     | 3981 tags=28%, list=25%, signal=37% |
| GSE15930_NAIVE_VS_24H_IN_VITRO     | 183 | 0.33666  | 1.13165 | 0.182836 | 0.499652 | 1 | 3406 tags=33%, list=21%, signal=41% | 0.407842  | 1.37552   | 0.00741656 | 0.212189  | 1     | 3369 tags=36%, list=21%, signal=44% |
| GSE29617_DAY3_VS_DAY7_TIV_FLU_1    | 151 | 0.344823 | 1.1314  | 0.198276 | 0.500098 | 1 | 2872 tags=26%, list=18%, signal=32% | -0.238218 | -0.908834 | 0.765854   | 0.847701  | 1     | 3035 tags=26%, list=19%, signal=32% |
| GSE360_L_MAJOR_VS_M_TUBERCUL       | 173 | 0.340805 | 1.13127 | 0.195813 | 0.500046 | 1 | 3801 tags=26%, list=24%, signal=34% | 0.362073  | 1.21941   | 0.0724095  | 0.40373   | 1     | 4978 tags=42%, list=31%, signal=60% |
| GSE29618_PRE_VS_DAY7_POST_LAIV     | 165 | 0.340723 | 1.13121 | 0.192402 | 0.499758 |   |                                     |           |           |            |           |       |                                     |

|                                 |     |          |         |          |          |   |                                     |           |           |            |          |   |                                     |
|---------------------------------|-----|----------|---------|----------|----------|---|-------------------------------------|-----------|-----------|------------|----------|---|-------------------------------------|
| GSE9037_WT_VS_IRAK4_KO_LPS_4H   | 174 | 0.340749 | 1.12671 | 0.201212 | 0.507926 | 1 | 1681 tags=16%, list=10%, signal=17% | 0.357266  | 1.20933   | 0.104271   | 0.418644 | 1 | 3120 tags=26%, list=19%, signal=32% |
| GSE360_HIGH_DOSE_B_MALAYI_VS_I  | 180 | 0.338137 | 1.12668 | 0.201422 | 0.507545 | 1 | 3213 tags=26%, list=20%, signal=32% | 0.326251  | 1.10629   | 0.25222    | 0.555391 | 1 | 2477 tags=21%, list=15%, signal=24% |
| GSE17721_PAM3CSK4_VS_CPG_2H_B   | 176 | 0.340543 | 1.12643 | 0.189055 | 0.507981 | 1 | 3029 tags=24%, list=19%, signal=30% | 0.282145  | 0.957279  | 0.565432   | 0.778335 | 1 | 2750 tags=21%, list=17%, signal=25% |
| GSE14308_NAIVE_CD4_TCELL_VS_NA  | 165 | 0.339432 | 1.12634 | 0.220663 | 0.507856 | 1 | 4128 tags=38%, list=26%, signal=50% | 0.267442  | 0.898348  | 0.716625   | 0.85718  | 1 | 3536 tags=29%, list=22%, signal=37% |
| GSE27786_BCELL_VS_CD4_TCELL_UP  | 176 | 0.342212 | 1.12634 | 0.193154 | 0.507369 | 1 | 2885 tags=28%, list=18%, signal=34% | -0.250398 | -0.968547 | 0.553398   | 0.724059 | 1 | 3706 tags=37%, list=23%, signal=47% |
| RECEPTOR_BINDING                | 343 | 0.320349 | 1.12575 | 0.147826 | 0.508949 | 1 | 2972 tags=20%, list=19%, signal=24% | 0.33698   | 1.19683   | 0.062921   | 0.432154 | 1 | 3114 tags=20%, list=19%, signal=24% |
| GSE17974_CTRL_VS_ACT_IL4_AND_A  | 159 | 0.340907 | 1.12571 | 0.201531 | 0.50863  | 1 | 2139 tags=23%, list=13%, signal=26% | 0.280751  | 0.932369  | 0.649694   | 0.808221 | 1 | 2385 tags=20%, list=15%, signal=23% |
| GSE8515_IL1_VS_IL6_4H_STIM_MAC  | 184 | 0.338222 | 1.12545 | 0.227494 | 0.509071 | 1 | 3628 tags=39%, list=23%, signal=49% | 0.286488  | 0.970988  | 0.558168   | 0.773066 | 1 | 3050 tags=30%, list=23%, signal=39% |
| GSE2706_LPS_VS_R848_AND_LPS_8C  | 171 | 0.341824 | 1.12525 | 0.216667 | 0.509331 | 1 | 2593 tags=26%, list=16%, signal=31% | 0.375148  | 1.2672    | 0.054177   | 0.331906 | 1 | 3658 tags=29%, list=19%, signal=35% |
| GSE27786_LSK_VS_BCELL_UP        | 169 | 0.337826 | 1.12519 | 0.202179 | 0.50904  | 1 | 1810 tags=18%, list=11%, signal=20% | 0.263723  | 0.877319  | 0.778052   | 0.884691 | 1 | 3130 tags=25%, list=19%, signal=31% |
| GSE17721_LPS_VS_POLYIC_24H_BMC  | 173 | 0.336337 | 1.12504 | 0.200241 | 0.509118 | 1 | 2201 tags=21%, list=14%, signal=25% | -0.312266 | -1.19494  | 0.0494506  | 0.428599 | 1 | 2642 tags=31%, list=16%, signal=37% |
| GSE13306_LAMINA_PROPRRIA_VS_SPL | 172 | 0.341555 | 1.12481 | 0.201474 | 0.50947  | 1 | 2890 tags=29%, list=18%, signal=35% | -0.331792 | -1.29417  | 0.0104712  | 0.348162 | 1 | 2599 tags=30%, list=16%, signal=36% |
| GSE17721_POLYIC_VS_GARDIQUIMOI  | 182 | 0.336022 | 1.12449 | 0.203125 | 0.510137 | 1 | 3003 tags=26%, list=19%, signal=31% | 0.336638  | 1.13635   | 0.197062   | 0.516281 | 1 | 2266 tags=24%, list=14%, signal=27% |
| GSE17721_CTRL_VS_GARDIQUIMOD_   | 181 | 0.336304 | 1.12416 | 0.215827 | 0.510892 | 1 | 2981 tags=25%, list=19%, signal=31% | 0.345988  | 1.16899   | 0.137931   | 0.467448 | 1 | 2462 tags=23%, list=15%, signal=27% |
| GSE9006_TYPE_I_DIABETES_AT_DX_1 | 165 | 0.341958 | 1.12358 | 0.215347 | 0.512527 | 1 | 1768 tags=17%, list=11%, signal=19% | -0.258015 | -0.995332 | 0.469388   | 0.66491  | 1 | 2539 tags=26%, list=16%, signal=31% |
| GSE7852_TREG_VS_TCONV_LN_DN     | 175 | 0.337505 | 1.12348 | 0.201691 | 0.51245  | 1 | 3098 tags=28%, list=19%, signal=34% | 0.268172  | 0.903742  | 0.695291   | 0.849384 | 1 | 3048 tags=24%, list=19%, signal=29% |
| GSE2706_2H_VS_8H_R848_AND_LPS   | 167 | 0.335479 | 1.12285 | 0.216545 | 0.514215 | 1 | 3289 tags=26%, list=20%, signal=33% | -0.266583 | -1.00891  | 0.398964   | 0.634211 | 1 | 2938 tags=28%, list=18%, signal=33% |
| GSE22886_NEUTROPHIL_VS_DC_UP    | 164 | 0.338884 | 1.12268 | 0.218477 | 0.514369 | 1 | 2428 tags=20%, list=15%, signal=23% | 0.368951  | 1.23792   | 0.0857503  | 0.378632 | 1 | 2849 tags=20%, list=18%, signal=23% |
| GSE13411_NAIVE_VS_SWITCHED_CELL | 159 | 0.338641 | 1.12201 | 0.211854 | 0.516343 | 1 | 1049 tags=9%, list=7%, signal=10%   | 0.29337   | 0.979321  | 0.5        | 0.763778 | 1 | 3928 tags=21%, list=24%, signal=27% |
| GSE15659_CD45RA_NEG_CD4_TCELL   | 165 | 0.340315 | 1.1218  | 0.243176 | 0.516647 | 1 | 3916 tags=30%, list=24%, signal=39% | 0.256017  | 0.855417  | 0.823441   | 0.904776 | 1 | 3617 tags=27%, list=23%, signal=35% |
| GSE3982_NEUTROPHIL_VS_TH1_DN    | 182 | 0.334359 | 1.12139 | 0.219194 | 0.517651 | 1 | 3250 tags=32%, list=20%, signal=40% | 0.329462  | 1.12486   | 0.193026   | 0.535702 | 1 | 3094 tags=32%, list=19%, signal=40% |
| GSE17721_LPS_VS_GARDIQUIMOD_4   | 170 | 0.339864 | 1.12134 | 0.196581 | 0.517346 | 1 | 2578 tags=23%, list=16%, signal=27% | 0.362209  | 1.22983   | 0.0780586  | 0.38545  | 1 | 3449 tags=35%, list=21%, signal=44% |
| GSE30083_SP3_VS_SP4_THYMOCYTE   | 172 | 0.33806  | 1.12123 | 0.214373 | 0.517229 | 1 | 2002 tags=13%, list=12%, signal=15% | 0.362251  | 1.232     | 0.0730769  | 0.382541 | 1 | 1992 tags=14%, list=12%, signal=16% |
| GSE13484_3H_UNSTIM_VS_YF170_V   | 184 | 0.338459 | 1.12106 | 0.197855 | 0.517294 | 1 | 2653 tags=27%, list=17%, signal=32% | 0.334123  | 1.13416   | 0.184615   | 0.516816 | 1 | 2667 tags=27%, list=17%, signal=32% |
| GSE17721_PAM3CSK4_VS_GADIQUIV   | 172 | 0.340669 | 1.12105 | 0.203956 | 0.516833 | 1 | 3225 tags=26%, list=20%, signal=32% | -0.255802 | -0.981558 | 0.49763    | 0.696386 | 1 | 2204 tags=20%, list=14%, signal=23% |
| GSE19825_NAIVE_VS_DAY3_EFF_CD8  | 170 | 0.337414 | 1.12056 | 0.213568 | 0.518074 | 1 | 3553 tags=34%, list=22%, signal=43% | 0.36905   | 1.2511    | 0.0611995  | 0.355199 | 1 | 3866 tags=39%, list=24%, signal=51% |
| GSE7460_CTRL_VS_TGFB_TREATED_A  | 172 | 0.3371   | 1.1203  | 0.20919  | 0.518522 | 1 | 2933 tags=29%, list=18%, signal=35% | 0.327063  | 1.08669   | 0.271482   | 0.592625 | 1 | 2758 tags=28%, list=17%, signal=33% |
| GSE7460_CTRL_VS_TGFB_TREATED_A  | 171 | 0.337853 | 1.12013 | 0.232877 | 0.51861  | 1 | 2020 tags=20%, list=13%, signal=23% | 0.28466   | 0.955814  | 0.574416   | 0.779186 | 1 | 2560 tags=25%, list=16%, signal=29% |
| GSE17974_OH_VS_4H_IN_VITRO_ACT  | 150 | 0.341453 | 1.11955 | 0.243073 | 0.521039 | 1 | 1912 tags=19%, list=12%, signal=22% | 0.274037  | 0.910439  | 0.689308   | 0.839626 | 1 | 2837 tags=24%, list=18%, signal=29% |
| GSE24634_IL4_VS_CTRL_TREATED_N  | 181 | 0.338141 | 1.11903 | 0.202736 | 0.521581 | 1 | 3153 tags=31%, list=20%, signal=39% | 0.340092  | 1.14002   | 0.167082   | 0.510997 | 1 | 2887 tags=30%, list=18%, signal=37% |
| GSE17974_IL4_AND_ANTI_IL12_VS_U | 162 | 0.340965 | 1.11861 | 0.211706 | 0.522645 | 1 | 2855 tags=28%, list=18%, signal=33% | 0.291737  | 0.998663  | 0.470064   | 0.742573 | 1 | 2738 tags=23%, list=17%, signal=28% |
| CHANNEL_REGULATOR_ACTIVITY      | 22  | 0.459376 | 1.11859 | 0.298851 | 0.522259 | 1 | 2499 tags=23%, list=16%, signal=27% | 0.446381  | 1.10032   | 0.31067    | 0.561756 | 1 | 4103 tags=27%, list=26%, signal=37% |
| GSE3982_MAST_CELL_VS_MAC_UP     | 166 | 0.339534 | 1.11854 | 0.213852 | 0.521936 | 1 | 1834 tags=19%, list=11%, signal=21% | -0.293132 | -1.12149  | 0.117347   | 0.490901 | 1 | 2438 tags=30%, list=15%, signal=34% |
| GSE13306_TREG_VS_TCONV_LAMINA   | 178 | 0.335476 | 1.11852 | 0.222087 | 0.521542 | 1 | 2632 tags=25%, list=16%, signal=29% | 0.321596  | 1.08096   | 0.272277   | 0.602632 | 1 | 2692 tags=24%, list=17%, signal=28% |
| GSE17721_CTRL_VS_GARDIQUIMOD_   | 176 | 0.33947  | 1.11815 | 0.207683 | 0.522471 | 1 | 3127 tags=28%, list=19%, signal=35% | 0.304127  | 1.02648   | 0.612422   | 0.701855 | 1 | 3495 tags=28%, list=22%, signal=36% |
| INTERMEDIATE_FILAMENT           | 22  | 0.463073 | 1.11797 | 0.306502 | 0.522575 | 1 | 4035 tags=23%, list=25%, signal=30% | -0.338023 | -0.896398 | 0.433148   | 0.875511 | 1 | 435 tags=9%, list=3%, signal=9%     |
| GSE22886_DAY0_VS_DAY1_MONOCY    | 179 | 0.338198 | 1.11771 | 0.206024 | 0.523014 | 1 | 3228 tags=34%, list=20%, signal=42% | 0.381834  | 1.28689   | 0.0321296  | 0.307517 | 1 | 3976 tags=42%, list=25%, signal=56% |
| GSE36476_YOUNG_VS_OLD_DONOR     | 164 | 0.339674 | 1.11764 | 0.217604 | 0.522769 | 1 | 3124 tags=23%, list=19%, signal=28% | 0.431666  | 1.43147   | 0.00979192 | 0.162345 | 1 | 2411 tags=25%, list=17%, signal=29% |
| GSE3982_MAST_CELL_VS_BASOPHIL   | 170 | 0.339072 | 1.11751 | 0.200748 | 0.522744 | 1 | 3066 tags=29%, list=19%, signal=36% | 0.349163  | 1.18468   | 0.119552   | 0.445946 | 1 | 2707 tags=25%, list=17%, signal=30% |
| GSE15324_ELF4_KO_VS_WT_ACTIVAI  | 173 | 0.33683  | 1.1174  | 0.206161 | 0.522705 | 1 | 2680 tags=26%, list=17%, signal=31% | -0.249609 | -0.957345 | 0.621622   | 0.752516 | 1 | 3183 tags=34%, list=20%, signal=42% |
| GSE17974_CTRL_VS_ACT_IL4_AND_A  | 167 | 0.339137 | 1.11738 | 0.213415 | 0.522279 | 1 | 2875 tags=28%, list=18%, signal=34% | 0.391106  | 1.31339   | 0.0319285  | 0.572266 | 1 | 3700 tags=43%, list=23%, signal=55% |
| GSE2826_WT_VS_XID_BCELL_DN      | 175 | 0.337959 | 1.11712 | 0.217026 | 0.52275  | 1 | 2920 tags=24%, list=18%, signal=29% | -0.255506 | -0.972562 | 0.528846   | 0.716014 | 1 | 3085 tags=25%, list=19%, signal=31% |
| GSE17721_POLYIC_VS_GARDIQUIMOI  | 179 | 0.333936 | 1.11677 | 0.207479 | 0.523554 | 1 | 3291 tags=29%, list=21%, signal=36% | -0.270096 | -1.03603  | 0.599752   | 0.959752 | 1 | 1893 tags=20%, list=12%, signal=23% |
| GSE17721_CTRL_VS_CPG_8H_BMDM    | 173 | 0.33356  | 1.11601 | 0.211422 | 0.525815 | 1 | 3297 tags=32%, list=21%, signal=40% | 0.286013  | 0.961603  | 0.566792   | 0.774594 | 1 | 3228 tags=32%, list=20%, signal=39% |
| GSE3982_BASOPHIL_VS_TH1_UP      | 169 | 0.336723 | 1.11594 | 0.229369 | 0.525561 | 1 | 2829 tags=22%, list=18%, signal=26% | -0.306043 | -1.17827  | 0.0526316  | 0.446026 | 1 | 3273 tags=37%, list=20%, signal=46% |
| GSE360_LOW_DOSE_B_MALAYI_VS_#   | 172 | 0.336903 | 1.11567 | 0.21358  | 0.526046 | 1 | 3386 tags=26%, list=21%, signal=33% | 0.303331  | 1.02288   | 0.403917   | 0.705213 | 1 | 2406 tags=26%, list=15%, signal=30% |
| GSE17721_PAM3CSK4_VS_CPG_8H_B   | 178 | 0.336141 | 1.11523 | 0.235516 | 0.527131 | 1 | 2358 tags=21%, list=15%, signal=24% | -0.250121 | -0.978362 | 0.538462   | 0.703661 | 1 | 2818 tags=30%, list=18%, signal=36% |
| LIPOPROTEIN_BINDING             | 15  | 0.499965 | 1.1152  | 0.310924 | 0.52676  | 1 | 1368 tags=27%, list=9%, signal=29%  | 0.449507  | 1.00157   | 0.459235   | 0.74198  | 1 | 547 tags=20%, list=3%, signal=21%   |
| GSE30083_SPI1_VS_SPI3_THYMOCYTE | 181 | 0.335401 | 1.11514 | 0.236386 | 0.52648  | 1 | 2868 tags=28%, list=18%, signal=33% | 0.414453  | 1.40228   | 0.00500626 | 0.190223 | 1 | 2796 tags=31%, list=17%, signal=38% |
| GSE22886_NEUTROPHIL_VS_DC_DN    | 174 | 0.333722 | 1.11507 | 0.230404 | 0.526427 | 1 | 3480 tags=30%, list=22%, signal=38% | -0.296241 | -1.14252  | 0.116612   | 0.466559 | 1 | 3278 tags=39%, list=20%, signal=48% |
| GSE399_EX_VIVO_VS_IN_CULTURE_C  | 180 | 0.333844 | 1.11501 | 0.228856 | 0.525976 | 1 | 2253 tags=23%, list=14%, signal=27% | 0.26203   | 0.879223  | 0.763454   | 0.882852 | 1 | 3135 tags=28%, list=20%, signal=35% |
| GSE14769_UNSTIM_VS_360MIN_LPS   | 173 | 0.333518 | 1.11494 | 0.220359 | 0.52574  | 1 | 3584 tags=34%, list=22%, signal=47% | 0.265425  | 0.890253  | 0.744734   | 0.869211 | 1 | 2247 tags=18%, list=14%, signal=21% |
| MACROMOLECULE_CATABOLIC_PROC    | 122 | 0.350261 | 1.11461 | 0.235669 | 0.526405 | 1 | 2092 tags=23%, list=13%, signal=26% | 0.30589   | 0.989885  | 0.479487   | 0.750733 | 1 | 2247 tags=20%, list=14%, signal=23% |
| GSE3982_NEUTROPHIL_VS_EFF_MEM   | 170 | 0.338726 | 1.11419 | 0.210462 | 0.527651 | 1 | 3316 tags=33%, list=21%, signal=41% | 0.306056  | 1.02849   | 0.3733     | 0.700357 | 1 | 2920 tags=29%, list=18%, signal=36% |
| MULTI_ORGANISM_PROCESS          | 128 | 0.343247 | 1.11416 | 0.240554 | 0.527141 | 1 | 2184 tags=17%, list=14%, signal=20% | 0.387374  | 1.25516   | 0.0722581  | 0.350748 | 1 | 3240 tags=26%, list=20%, signal=32% |
| GSE32423_MEMORY_VS_NAIVE_CD8    | 173 | 0.334003 | 1.11393 | 0.237674 | 0.527402 | 1 | 2745 tags=26%, list=17%, signal=31% | 0.32838   | 1.10128   | 0.267166   | 0.559728 | 1 | 3197 tags=31%, list=20%, signal=38% |
| GSE14308_NAIVE_CD4_TCELL_VS_IN  | 166 | 0.339638 | 1.11391 | 0.228501 | 0.526995 | 1 | 3219 tags=28%, list=20%, signal=34% | -0.265101 | -1.01107  | 0.404651   | 0.629108 | 1 | 3082 tags=34%, list=19%, signal=42% |
| GSE30962_ACUTE_VS_CHRONIC_LCM   | 175 | 0.333458 | 1.11351 | 0.219542 | 0.528047 | 1 | 3313 tags=33%, list=21%, signal=41% | -0.280401 | -1.07407  | 0.237569   | 0.546688 | 1 | 3127 tags=34%, list=19%, signal=41% |
| TRANSCRIPTION_FACTOR_BINDING    | 278 | 0.323203 | 1.11339 | 0.193622 | 0.528022 | 1 | 2804 tags=23%, list=17%, signal=27% | -0.245622 | -0.993266 | 0.43333    | 0.66857  | 1 | 2663 tags=24%, list=17%, signal=28% |
| GSE17721_PAM3CSK4_VS_GADIQUIV   | 180 | 0.332937 | 1.11318 | 0.220888 | 0.528324 | 1 | 4116 tags=38%, list=26%, signal=50% | 0.335076  | 1.13601   | 0.170135   | 0.516991 | 1 | 3549 tags=33%, list=22%, signal=42% |
| GSE29615_CTRL_VS_DAY3_LAIV_IFLU | 158 | 0.341702 | 1.11314 | 0.227328 | 0.527978 | 1 | 4011 tags=36%, list=25%, signal=48% | -0.272437 | -1.03793  | 0.340206   | 0.598932 | 1 | 3241 tags=31%, list=20%, signal=38% |
| GSE37416_CTRL_VS_24H_F_TULAREN  | 168 | 0.337563 | 1.11268 | 0.218712 | 0.529207 | 1 | 3512 tags=35%, list=22%, signal=44% | -0.286113 | -1.07883  | 0.204878   | 0.53831  | 1 | 2684 tags=26%, list=17%, signal=31% |
| GSE10325_CD4_TCELL_VS_LUPUS_CD  | 170 | 0.334849 | 1.11262 | 0.225182 | 0.528926 | 1 | 3120 tags=30%, list=19%, signal=37% | 0.327397  | 1.09919   | 0.258621   | 0.563188 | 1 | 2721 tags=27%, list=17%, signal=32% |
| GSE17721_POLYIC_VS_CPG_4H_BMD   | 177 | 0.335042 | 1.11226 | 0.234867 | 0.529733 | 1 | 3014 tags=28%, list=19%, signal=34% | -0.304299 | -1.16904  |            |          |   |                                     |



Supplementary Table 3. Gene enrichment statistics for HD and control monkeys.

|                                 |     |          |         |          |          |   |                                     |           |           |            |          |   |                                     |
|---------------------------------|-----|----------|---------|----------|----------|---|-------------------------------------|-----------|-----------|------------|----------|---|-------------------------------------|
| GSE27786_NKTCCELL_VS_NEUTROPHIL | 178 | 0.329547 | 1.08897 | 0.263223 | 0.568128 | 1 | 3741 tags=29%, list=23%, signal=38% | -0.239808 | -0.923775 | 0.751351   | 0.810398 | 1 | 3008 tags=25%, list=19%, signal=30% |
| TRANSMISSION_OF_NERVE_IMPULSE   | 174 | 0.327803 | 1.08896 | 0.269182 | 0.567681 | 1 | 2772 tags=14%, list=17%, signal=17% | 0.250488  | 0.844082  | 0.847853   | 0.91155  | 1 | 2102 tags=9%, list=13%, signal=10%  |
| SPHINGOLIPID_METABOLIC_PROCESS  | 26  | 0.43741  | 1.08883 | 0.319018 | 0.56767  | 1 | 2305 tags=23%, list=14%, signal=27% | 0.415337  | 1.03931   | 0.400324   | 0.683015 | 1 | 2959 tags=27%, list=18%, signal=33% |
| GSE29618_PRE_VS_DAY7_POST_TIV   | 175 | 0.327699 | 1.08884 | 0.261239 | 0.56878  | 1 | 2703 tags=24%, list=17%, signal=29% | 0.382391  | 1.29702   | 0.033792   | 0.292153 | 1 | 2889 tags=31%, list=18%, signal=37% |
| GSE29618_LAVI_VS_TIV_FLU_VACCIN | 176 | 0.324802 | 1.08821 | 0.266667 | 0.568978 | 1 | 2358 tags=22%, list=15%, signal=25% | 0.218216  | 0.732484  | 0.986651   | 0.989393 | 1 | 3715 tags=25%, list=23%, signal=32% |
| REGULATION_OF_DNA_BINDING       | 44  | 0.392786 | 1.08778 | 0.309696 | 0.570013 | 1 | 2597 tags=32%, list=16%, signal=38% | 0.400493  | 1.12359   | 0.268769   | 0.533867 | 1 | 3560 tags=36%, list=22%, signal=47% |
| GSE9650_NAIVE_VS_EXHAUSTED_CD   | 181 | 0.328884 | 1.08773 | 0.28519  | 0.5698   | 1 | 2975 tags=25%, list=19%, signal=31% | 0.335517  | 1.12524   | 0.190534   | 0.536743 | 1 | 2960 tags=26%, list=18%, signal=31% |
| GSE7764_IL15_TREATED_VS_CTRL_NI | 182 | 0.325854 | 1.08729 | 0.277035 | 0.570918 | 1 | 3210 tags=30%, list=20%, signal=37% | 0.443384  | 1.50119   | 0.00123557 | 0.127071 | 1 | 2993 tags=37%, list=19%, signal=45% |
| GSE3982_EOSINOPHIL_VS_BASOPHIL  | 169 | 0.329117 | 1.08687 | 0.265356 | 0.572026 | 1 | 3741 tags=31%, list=23%, signal=40% | 0.382202  | 1.27574   | 0.0405547  | 0.317421 | 1 | 3610 tags=33%, list=22%, signal=42% |
| GSE12366_GC_BCELL_VS_PLASMA_CI  | 157 | 0.333343 | 1.0866  | 0.294118 | 0.572597 | 1 | 3048 tags=25%, list=19%, signal=30% | 0.326305  | 1.09212   | 0.268473   | 0.578293 | 1 | 2881 tags=26%, list=18%, signal=32% |
| CELL_CELL_SIGNALLING            | 373 | 0.308367 | 1.08651 | 0.243421 | 0.572481 | 1 | 2792 tags=14%, list=17%, signal=17% | 0.309323  | 1.11042   | 0.18743    | 0.549743 | 1 | 3024 tags=15%, list=19%, signal=18% |
| GSE20715_WT_VS_TLR4_KO_24H_OZ   | 175 | 0.328352 | 1.0864  | 0.254717 | 0.572428 | 1 | 3314 tags=30%, list=21%, signal=38% | 0.429552  | 1.4546    | 0          | 0.150901 | 1 | 3125 tags=32%, list=19%, signal=39% |
| GSE17721_LPS_VS_POLYIC_8H_BMDP  | 170 | 0.32826  | 1.08639 | 0.279393 | 0.571995 | 1 | 3240 tags=29%, list=20%, signal=36% | 0.278054  | 0.938301  | 0.62142    | 0.801187 | 1 | 3836 tags=32%, list=24%, signal=41% |
| MESODERM_DEVELOPMENT            | 20  | 0.45468  | 1.08588 | 0.346906 | 0.57336  | 1 | 3863 tags=30%, list=24%, signal=39% | -0.410963 | -1.053    | 0.344828   | 0.579652 | 1 | 1121 tags=15%, list=7%, signal=16%  |
| GSE17721_CPG_VS_GARDIQUIMOD_    | 172 | 0.326201 | 1.08574 | 0.27056  | 0.573406 | 1 | 3059 tags=23%, list=19%, signal=28% | 0.315479  | 1.0603    | 0.35159    | 0.643988 | 1 | 3232 tags=27%, list=20%, signal=34% |
| GSE17721_CTRL_VS_LPS_8H_BMDM    | 170 | 0.328333 | 1.08574 | 0.280193 | 0.57295  | 1 | 3292 tags=31%, list=21%, signal=38% | -0.258481 | -0.984296 | 0.451282   | 0.688327 | 1 | 3333 tags=36%, list=21%, signal=46% |
| CELL_STRUCTURE_DISASSEMBLY_DUF  | 15  | 0.484573 | 1.08573 | 0.378467 | 0.572521 | 1 | 1470 tags=27%, list=9%, signal=29%  | 0.487384  | 1.10594   | 0.331606   | 0.554407 | 1 | 2550 tags=40%, list=16%, signal=48% |
| CYTOKINE_ACTIVITY               | 100 | 0.346167 | 1.08558 | 0.301783 | 0.572552 | 1 | 1300 tags=13%, list=8%, signal=14%  | 0.402851  | 1.26781   | 0.0745672  | 0.33082  | 1 | 2815 tags=22%, list=18%, signal=27% |
| GSE9650_EXHAUSTED_VS_MEMORY     | 184 | 0.325807 | 1.08556 | 0.274486 | 0.572155 | 1 | 2475 tags=21%, list=15%, signal=25% | 0.426891  | 1.44981   | 0.00245399 | 0.152604 | 1 | 3169 tags=39%, list=20%, signal=39% |
| GSE360_T_GONDI_VS_B_MALAYI_LO   | 178 | 0.327697 | 1.08538 | 0.272175 | 0.572285 | 1 | 1822 tags=17%, list=11%, signal=19% | 0.340541  | 1.15506   | 0.152147   | 0.485778 | 1 | 2097 tags=12%, list=13%, signal=21% |
| SPINDLE_POLE                    | 17  | 0.486269 | 1.0851  | 0.379032 | 0.572839 | 1 | 2967 tags=41%, list=18%, signal=50% | 0.52418   | 1.21128   | 0.208122   | 0.416766 | 1 | 2306 tags=41%, list=14%, signal=48% |
| SKELETAL_DEVELOPMENT            | 88  | 0.352218 | 1.08506 | 0.307692 | 0.572547 | 1 | 4834 tags=30%, list=30%, signal=42% | 0.315064  | 0.977517  | 0.503294   | 0.763312 | 1 | 3150 tags=17%, list=20%, signal=25% |
| GSE29618_BCELL_VS_MDC_DAY7_FLU  | 162 | 0.331076 | 1.08459 | 0.280941 | 0.573785 | 1 | 3528 tags=35%, list=22%, signal=45% | -0.266163 | -1.01415  | 0.378505   | 0.62523  | 1 | 2064 tags=22%, list=23%, signal=21% |
| GSE17721_LPS_VS_GARDIQUIMOD_1   | 176 | 0.325226 | 1.08415 | 0.271062 | 0.574905 | 1 | 3723 tags=34%, list=23%, signal=43% | 0.336538  | 1.12671   | 0.18875    | 0.533547 | 1 | 1984 tags=19%, list=12%, signal=22% |
| GSE360_L_DONOVANI_VS_B_MALAYI   | 169 | 0.326576 | 1.08369 | 0.283966 | 0.576083 | 1 | 3540 tags=36%, list=22%, signal=46% | 0.320209  | 1.0754    | 0.306629   | 0.61192  | 1 | 1936 tags=23%, list=12%, signal=26% |
| GSE20366_CD103_POS_VS_CD103_KI  | 172 | 0.32369  | 1.08356 | 0.276699 | 0.57608  | 1 | 3290 tags=26%, list=20%, signal=33% | -0.280531 | -1.08265  | 0.190698   | 0.545844 | 1 | 2648 tags=27%, list=16%, signal=32% |
| GSE11864_CSF1_VS_CSF1_FNG_PAM   | 170 | 0.324913 | 1.08228 | 0.271739 | 0.580297 | 1 | 2858 tags=29%, list=18%, signal=35% | -0.269943 | -1.03917  | 0.285714   | 0.600965 | 1 | 2006 tags=25%, list=12%, signal=29% |
| GSE27786_CD4_TCELL_VS_NEUTROPHI | 169 | 0.325869 | 1.08227 | 0.292079 | 0.57986  | 1 | 2502 tags=19%, list=16%, signal=22% | 0.312251  | 1.04501   | 0.378713   | 0.674926 | 1 | 3599 tags=28%, list=22%, signal=35% |
| PEPTIDE_BINDING                 | 80  | 0.357024 | 1.08222 | 0.316872 | 0.579574 | 1 | 2972 tags=20%, list=19%, signal=24% | -0.327283 | -1.13636  | 0.1875     | 0.469269 | 1 | 3328 tags=23%, list=21%, signal=28% |
| GSE1460_DP_THYMOCYTE_VS_NAIVE   | 171 | 0.32495  | 1.08213 | 0.277712 | 0.579437 | 1 | 4056 tags=37%, list=25%, signal=49% | 0.39587   | 1.33087   | 0.0236908  | 0.261594 | 1 | 3392 tags=37%, list=21%, signal=47% |
| GSE360_CTRL_VS_M_TUBERCULOSIS   | 178 | 0.326389 | 1.08202 | 0.293622 | 0.579387 | 1 | 2896 tags=23%, list=18%, signal=28% | 0.226809  | 0.770425  | 0.965854   | 0.975076 | 1 | 3647 tags=25%, list=23%, signal=32% |
| MOTOR_ACTIVITY                  | 26  | 0.428191 | 1.08115 | 0.356577 | 0.582023 | 1 | 3608 tags=38%, list=22%, signal=50% | 0.466243  | 1.17858   | 0.129551   | 0.452029 | 1 | 2275 tags=13%, list=14%, signal=16% |
| MONOVALENT_INORGANIC_CATION_    | 31  | 0.420984 | 1.08073 | 0.334906 | 0.582983 | 1 | 2871 tags=26%, list=18%, signal=31% | 0.240323  | 0.625505  | 0.981538   | 0.998004 | 1 | 2693 tags=19%, list=17%, signal=23% |
| ALCOHOL_METABOLIC_PROCESS       | 83  | 0.355028 | 1.08048 | 0.31405  | 0.583483 | 1 | 2718 tags=25%, list=17%, signal=30% | 0.324928  | 1.00008   | 0.45034    | 0.740284 | 1 | 2640 tags=24%, list=16%, signal=29% |
| GSE17721_PAM3CSK4_VS_GADIQUIM   | 181 | 0.325671 | 1.08025 | 0.294826 | 0.583815 | 1 | 3882 tags=34%, list=24%, signal=45% | -0.250094 | -0.96412  | 0.577778   | 0.739683 | 1 | 2845 tags=28%, list=18%, signal=33% |
| GSE20366_TREG_VS_TCONV_DN       | 177 | 0.324144 | 1.08019 | 0.275689 | 0.583569 | 1 | 3335 tags=28%, list=21%, signal=35% | 0.343667  | 1.17197   | 0.137672   | 0.462216 | 1 | 1940 tags=21%, list=12%, signal=24% |
| NUCLEOTIDE_METABOLIC_PROCESS    | 39  | 0.399356 | 1.07979 | 0.327354 | 0.584672 | 1 | 3804 tags=44%, list=24%, signal=57% | 0.385557  | 1.06639   | 0.353395   | 0.613034 | 1 | 3625 tags=31%, list=23%, signal=40% |
| HYDROLASE_ACTIVITY_ACTING_ON_E  | 243 | 0.31768  | 1.07974 | 0.281723 | 0.584357 | 1 | 2163 tags=19%, list=13%, signal=22% | 0.338319  | 1.17625   | 0.0998811  | 0.454106 | 1 | 3904 tags=32%, list=24%, signal=42% |
| GSE15767_MED_VS_SCS_MAC_LN_DI   | 179 | 0.324751 | 1.07964 | 0.28401  | 0.584243 | 1 | 3670 tags=35%, list=23%, signal=45% | 0.249998  | 0.843449  | 0.866337   | 0.911965 | 1 | 2341 tags=17%, list=15%, signal=20% |
| GSE22886_DAY0_VS_DAY7_MONOCY    | 166 | 0.328747 | 1.07937 | 0.293465 | 0.584747 | 1 | 3084 tags=30%, list=19%, signal=37% | -0.280715 | -1.06875  | 0.227979   | 0.555008 | 1 | 3295 tags=36%, list=20%, signal=45% |
| MICROTUBULE_CYTOSKELETON_ORG    | 33  | 0.407412 | 1.07848 | 0.343653 | 0.587639 | 1 | 3105 tags=30%, list=19%, signal=37% | 0.350033  | 0.936174  | 0.558664   | 0.803555 | 1 | 4057 tags=36%, list=26%, signal=49% |
| INTERLEUKIN_RECEPTOR_ACTIVITY   | 17  | 0.472759 | 1.07827 | 0.36748  | 0.588016 | 1 | 2169 tags=35%, list=14%, signal=41% | 0.468558  | 1.0839    | 0.332242   | 0.598129 | 1 | 1504 tags=35%, list=9%, signal=39%  |
| SPECIFIC_RNA_POLYMERASE_II_TRAN | 32  | 0.416371 | 1.07784 | 0.335375 | 0.58919  | 1 | 3798 tags=34%, list=24%, signal=45% | 0.356841  | 0.949985  | 0.55296    | 0.786923 | 1 | 18 tags=6%, list=0%, signal=6%      |
| GSE17721_CTRL_VS_LPS_4H_BMDM    | 175 | 0.324303 | 1.07758 | 0.282903 | 0.589677 | 1 | 3285 tags=25%, list=20%, signal=31% | 0.328918  | 1.10201   | 0.232311   | 0.55863  | 1 | 2293 tags=17%, list=14%, signal=20% |
| GSE22886_TH1_VS_TH2_12H_ACT_DI  | 166 | 0.327909 | 1.0774  | 0.318182 | 0.589858 | 1 | 3196 tags=24%, list=20%, signal=30% | -0.261633 | -0.992804 | 0.489899   | 0.669266 | 1 | 2702 tags=23%, list=17%, signal=27% |
| LIPID_BIOSYNTHETIC_PROCESS      | 89  | 0.351535 | 1.07732 | 0.309859 | 0.58969  | 1 | 3285 tags=24%, list=20%, signal=30% | 0.412598  | 1.28723   | 0.0900141  | 0.307721 | 1 | 2854 tags=30%, list=18%, signal=37% |
| GSE17580_UNINFECTED_VS_S_MANS   | 170 | 0.326077 | 1.07717 | 0.298077 | 0.589792 | 1 | 3973 tags=32%, list=25%, signal=42% | 0.342627  | 1.15793   | 0.145754   | 0.484059 | 1 | 3370 tags=31%, list=21%, signal=39% |
| GSE9988_LOW_LPS_VS_CTRL_TREAT   | 175 | 0.322767 | 1.077   | 0.291925 | 0.58992  | 1 | 3208 tags=31%, list=20%, signal=39% | 0.289342  | 0.962724  | 0.54088    | 0.773385 | 1 | 2667 tags=26%, list=17%, signal=31% |
| GSE39820_CTRL_VS_IL1B_IL23A_    | 182 | 0.322596 | 1.07675 | 0.287605 | 0.59034  | 1 | 3461 tags=30%, list=22%, signal=38% | 0.287713  | 0.979496  | 0.503713   | 0.763653 | 1 | 2967 tags=29%, list=18%, signal=35% |
| INTRACELLULAR_TRANSPORT         | 251 | 0.315746 | 1.07665 | 0.281933 | 0.590278 | 1 | 3499 tags=30%, list=22%, signal=38% | 0.284366  | 0.985617  | 0.504172   | 0.75055  | 1 | 2919 tags=26%, list=18%, signal=32% |
| FATTY_ACID_METABOLIC_PROCESS    | 58  | 0.372612 | 1.07611 | 0.33815  | 0.591732 | 1 | 1314 tags=17%, list=8%, signal=19%  | 0.40858   | 1.19829   | 0.184122   | 0.431824 | 1 | 2486 tags=28%, list=15%, signal=33% |
| PROTEIN_IMPORT                  | 54  | 0.373877 | 1.07604 | 0.318318 | 0.591539 | 1 | 3230 tags=31%, list=20%, signal=39% | 0.247701  | 0.717857  | 0.949568   | 0.992643 | 1 | 3737 tags=31%, list=23%, signal=41% |
| GSE13411_SWITCHED_MEMORY_BC     | 178 | 0.323973 | 1.07602 | 0.293758 | 0.59112  | 1 | 2311 tags=22%, list=14%, signal=25% | -0.349514 | -1.33275  | 0.0108108  | 0.335991 | 1 | 2685 tags=33%, list=17%, signal=39% |
| GSE15659_NAIVE_CD4_TCELL_VS_NC  | 144 | 0.332123 | 1.07585 | 0.305486 | 0.591293 | 1 | 4049 tags=31%, list=25%, signal=40% | 0.301742  | 0.991416  | 0.491591   | 0.750068 | 1 | 3444 tags=20%, list=21%, signal=25% |
| GSE5960_TH1_VS_ANERGIC_TH1_DN   | 177 | 0.321551 | 1.07545 | 0.293689 | 0.592257 | 1 | 3129 tags=27%, list=19%, signal=33% | 0.407533  | 1.37891   | 0.00737101 | 0.207663 | 1 | 3469 tags=33%, list=22%, signal=42% |
| CELLULAR_CARBOHYDRATE_CATABOLI  | 22  | 0.442432 | 1.07503 | 0.350962 | 0.593313 | 1 | 1571 tags=23%, list=10%, signal=25% | 0.473314  | 1.15342   | 0.252006   | 0.488723 | 1 | 1246 tags=23%, list=8%, signal=25%  |
| GSE17974_IL4_AND_ANTI_IL12_VS_U | 147 | 0.330684 | 1.07489 | 0.306295 | 0.593346 | 1 | 2597 tags=20%, list=16%, signal=24% | 0.356193  | 1.17614   | 0.139975   | 0.453195 | 1 | 4044 tags=32%, list=25%, signal=42% |
| GSE14308_TH2_VS_TH17_UP         | 177 | 0.322402 | 1.07464 | 0.294261 | 0.593778 | 1 | 3248 tags=27%, list=20%, signal=34% | 0.359169  | 1.21941   | 0.0699387  | 0.404439 | 1 | 4149 tags=40%, list=26%, signal=53% |
| CARBOHYDRATE_CATABOLIC_PROCES   | 23  | 0.442426 | 1.07411 | 0.367314 | 0.595275 | 1 | 1571 tags=22%, list=10%, signal=24% | 0.474309  | 1.17336   | 0.458521   | 0.458521 | 1 | 1246 tags=22%, list=8%, signal=24%  |
| LGASE_ACTIVITY_FORMING_CARBO    | 60  | 0.372354 | 1.07399 | 0.322535 | 0.595219 | 1 | 3479 tags=47%, list=22%, signal=59% | -0.338845 | -1.11802  | 0.227586   | 0.491294 | 1 | 3010 tags=42%, list=19%, signal=51% |
| GSE1460_INTRATHYMIC_T_PROGENIT  | 160 | 0.324624 | 1.07344 | 0.297092 | 0.595727 | 1 | 2368 tags=25%, list=15%, signal=29% | -0.271631 | -1.03054  | 0.34466    | 0.61189  | 1 | 2373 tags=28%, list=15%, signal=32% |
| GSE37416_12H_VS_24H_F_TULAREN   | 164 | 0.32456  | 1.0734  | 0.302583 | 0.596424 | 1 | 4214 tags=38%, list=26%, signal=52% | 0.281363  | 0.940659  | 0.606369   | 0.799602 | 1 | 1853 tags=20%, list=12%, signal=23% |
| GSE17721_CTRL_VS_CPG_12H_BMDA   | 182 | 0.323568 | 1.07336 | 0.305795 | 0.596097 | 1 | 3095 tags=24%, list=19%, signal=30% | 0.285971  | 0.969515  | 0.547561   | 0.772927 | 1 | 1924 tags=15%, list=12%, signal=17% |
| DOUBLE_STRANDED_RNA_BINDING     | 17  | 0.474844 | 1.0723  | 0.373554 | 0.595983 | 1 | 3279 tags=53%, list=20%, signal=66% | 0.430959  | 1.00746   | 0.340693   | 0.732073 | 1 | 3258 tags=41%, list=20%, signal=52% |
| GSE9650_NAIVE_VS_EXHAUSTED_CD   | 187 | 0.318878 | 1.07228 | 0.317905 | 0.599182 | 1 | 2102 tags=18%, list=13%, signal=21% | 0.334379  | 1.13546   |            |          |   |                                     |



Supplementary Table 3. Gene enrichment statistics for HD and control monkeys.

|                                      |       |          |         |          |          |   |                                     |           |           |            |          |   |                                     |
|--------------------------------------|-------|----------|---------|----------|----------|---|-------------------------------------|-----------|-----------|------------|----------|---|-------------------------------------|
| GSE9006_TYPE_1_DIABETES_AT_DX_1      | 179   | 0.319454 | 1.06988 | 0.297949 | 0.600498 | 1 | 3275 tags=30%, list=20%, signal=37% | 0.433713  | 1.48079   | 0.0036452  | 0.137941 | 1 | 2992 tags=40%, list=19%, signal=49% |
| IMMUNE_SYSTEM_DEVELOPMENT            | 71    | 0.357692 | 1.0693  | 0.331476 | 0.60219  | 1 | 3760 tags=32%, list=23%, signal=42% | 0.337848  | 1.01965   | 0.416303   | 0.708361 | 1 | 2704 tags=30%, list=17%, signal=35% |
| TRANSCRIPTION_FACTOR_ACTIVITY        | 318   | 0.305195 | 1.06892 | 0.279545 | 0.603901 | 1 | 2503 tags=20%, list=16%, signal=23% | -0.282101 | -1.15919  | 0.0338983  | 0.456106 | 1 | 2437 tags=22%, list=15%, signal=25% |
| GSE3982_CENT_MEMORY_CD4_TCELL        | 155   | 0.326287 | 1.06872 | 0.324121 | 0.603387 | 1 | 2314 tags=19%, list=14%, signal=22% | -0.382582 | -1.44653  | 0          | 0.287535 | 1 | 2049 tags=26%, list=13%, signal=30% |
| GSE360_L_DONOVANI_VS_B_MALAYI        | 176   | 0.321605 | 1.06872 | 0.306222 | 0.602939 | 1 | 3609 tags=34%, list=22%, signal=43% | 0.364481  | 1.22848   | 0.0809816  | 0.387073 | 1 | 2266 tags=27%, list=14%, signal=31% |
| GSE3982_EFF_MEMORY_CD4_TCELL         | 169   | 0.327241 | 1.06869 | 0.300245 | 0.602593 | 1 | 2629 tags=22%, list=16%, signal=27% | -0.289572 | -1.10074  | 0.172566   | 0.524526 | 1 | 2804 tags=25%, list=17%, signal=30% |
| RESPONSE_TO_NUTRIENT_LEVELS          | 26    | 0.433156 | 1.06835 | 0.376923 | 0.603467 | 1 | 3564 tags=19%, list=22%, signal=25% | 0.516895  | 1.31113   | 0.1028926  | 0.275399 | 1 | 3764 tags=35%, list=23%, signal=45% |
| GSE3982_NEUTROPHIL_VS_BCELL_UL       | 164   | 0.321889 | 1.06794 | 0.292929 | 0.604474 | 1 | 3495 tags=30%, list=22%, signal=38% | 0.296783  | 1.00108   | 0.4534     | 0.739873 | 1 | 2893 tags=24%, list=18%, signal=29% |
| GSE360_L_MAJOR_VS_M_TUBERCULU        | 163   | 0.324236 | 1.0671  | 0.310559 | 0.607063 | 1 | 2204 tags=18%, list=14%, signal=20% | 0.231046  | 0.770671  | 0.961347   | 0.975282 | 1 | 3274 tags=21%, list=20%, signal=27% |
| GSE360_CTRL_VS_B_MALAYI_HIGH_C       | 179   | 0.317968 | 1.06698 | 0.311377 | 0.607061 | 1 | 3163 tags=27%, list=20%, signal=33% | 0.388577  | 1.31848   | 0.0225847  | 0.269134 | 1 | 2416 tags=27%, list=15%, signal=31% |
| GSE17721_LPS_VS_PAM3CSK4_2H_BI       | 176   | 0.322664 | 1.06687 | 0.298544 | 0.606977 | 1 | 1879 tags=16%, list=12%, signal=18% | 0.272822  | 0.919154  | 0.652959   | 0.829498 | 1 | 3603 tags=27%, list=22%, signal=34% |
| GSE26928_CENTR_MEMORY_VS_CXC         | 154   | 0.325032 | 1.06667 | 0.321474 | 0.607202 | 1 | 2349 tags=18%, list=15%, signal=20% | 0.232584  | 0.780829  | 0.944444   | 0.968018 | 1 | 1735 tags=12%, list=11%, signal=14% |
| GSE1432_IH_VS_24H_IFNG_MICROG        | 179   | 0.318799 | 1.06659 | 0.31195  | 0.607019 | 1 | 2436 tags=23%, list=15%, signal=27% | 0.316458  | 1.06636   | 0.31211    | 0.630572 | 1 | 2095 tags=23%, list=13%, signal=26% |
| PROTEIN_LOCALIZATION                 | 190   | 0.322343 | 1.06638 | 0.292216 | 0.607298 | 1 | 3499 tags=30%, list=22%, signal=38% | 0.255585  | 0.867603  | 0.623952   | 0.893863 | 1 | 2909 tags=22%, list=18%, signal=27% |
| GSE17721_PAM3CSK4_VS_CPG_4H_B        | 175   | 0.317822 | 1.06631 | 0.316113 | 0.607097 | 1 | 1649 tags=17%, list=10%, signal=19% | 0.236405  | 0.798918  | 0.941103   | 0.957363 | 1 | 3814 tags=29%, list=24%, signal=37% |
| GSE22886_DAYO_VS_DAY7_MONOCY         | 181   | 0.3195   | 1.06609 | 0.307039 | 0.60743  | 1 | 2913 tags=28%, list=18%, signal=33% | 0.415518  | 1.39458   | 0.00493827 | 0.195984 | 1 | 3492 tags=43%, list=22%, signal=54% |
| GSE360_T_GONDII_VS_B_MALAYI_HI       | 171   | 0.322676 | 1.06601 | 0.319809 | 0.607245 | 1 | 2441 tags=22%, list=15%, signal=26% | 0.280878  | 0.945611  | 0.589809   | 0.791815 | 1 | 2232 tags=21%, list=14%, signal=24% |
| GSE17721_POLYIC_VS_PAM3CSK4_1E       | 174   | 0.324444 | 1.06584 | 0.335793 | 0.607428 | 1 | 2894 tags=24%, list=18%, signal=28% | 0.366532  | 1.23686   | 0.062344   | 0.378538 | 1 | 4114 tags=38%, list=26%, signal=50% |
| GSE15659_NAIVE_CD4_TCELL_VS_AC       | 153   | 0.32229  | 1.06569 | 0.322377 | 0.6075   | 1 | 1911 tags=17%, list=12%, signal=19% | 0.298443  | 0.998922  | 0.449312   | 0.742275 | 1 | 1801 tags=13%, list=11%, signal=14% |
| GSE17721_LPS_VS_4H_LPS_GARDIQUIMOD_0 | 174   | 0.321337 | 1.06531 | 0.309809 | 0.608391 | 1 | 3316 tags=29%, list=21%, signal=36% | -0.287088 | -1.1082   | 0.122066   | 0.511678 | 1 | 2906 tags=28%, list=18%, signal=35% |
| REGULATION_OF_DNA_REPLICATION        | 18    | 0.465711 | 1.06508 | 0.382003 | 0.608755 | 1 | 4057 tags=44%, list=25%, signal=59% | 0.362299  | 0.84618   | 0.695727   | 0.913272 | 1 | 154 tags=11%, list=1%, signal=11%   |
| GSE17721_0.5H_VS_24H_LPS_BMDM        | 175   | 0.319911 | 1.06495 | 0.307786 | 0.608706 | 1 | 2855 tags=23%, list=18%, signal=28% | 0.249832  | 0.846265  | 0.866812   | 0.913569 | 1 | 3778 tags=29%, list=24%, signal=37% |
| GSE17721_LPS_VS_CPG_8H_BMDM_I        | 175   | 0.322224 | 1.0647  | 0.315663 | 0.609192 | 1 | 3315 tags=24%, list=21%, signal=30% | -0.245447 | -0.940177 | 0.661836   | 0.77754  | 1 | 1183 tags=14%, list=7%, signal=15%  |
| GSE17721_POLYIC_VS_GARDIQUIMOD_1     | 175   | 0.321405 | 1.06454 | 0.30605  | 0.609322 | 1 | 3356 tags=30%, list=21%, signal=38% | -0.267374 | -1.00627  | 0.387435   | 0.640516 | 1 | 2570 tags=27%, list=16%, signal=32% |
| GSE22886_NAIVE_CD8_TCELL_VS_NK       | 174   | 0.318872 | 1.06429 | 0.309466 | 0.609744 | 1 | 4066 tags=37%, list=25%, signal=49% | 0.276239  | 0.93337   | 0.807527   | 0.807527 | 1 | 2418 tags=22%, list=15%, signal=25% |
| HEMATOPOIETIN_INTERFERON_CLASS       | 29    | 0.421217 | 1.06412 | 0.361669 | 0.609861 | 1 | 2169 tags=28%, list=14%, signal=32% | 0.361553  | 0.939757  | 0.565428   | 0.800015 | 1 | 1504 tags=21%, list=9%, signal=23%  |
| GSE17721_0.5H_VS_4H_LPS_BMDM_2       | 176   | 0.321185 | 1.06369 | 0.320197 | 0.611055 | 1 | 3492 tags=29%, list=22%, signal=37% | 0.302539  | 1.0226    | 0.406948   | 0.704557 | 1 | 3576 tags=35%, list=20%, signal=44% |
| GSE8384_CTRL_VS_B_ABORTUS_4H_I       | 170   | 0.321636 | 1.06343 | 0.323565 | 0.611544 | 1 | 3263 tags=28%, list=20%, signal=35% | 0.307662  | 1.02584   | 0.397985   | 0.702006 | 1 | 2577 tags=25%, list=16%, signal=30% |
| GLUCOSE_METABOLIC_PROCESS            | 27    | 0.421321 | 1.06335 | 0.369969 | 0.611386 | 1 | 2718 tags=37%, list=17%, signal=45% | 0.476507  | 1.20685   | 0.176012   | 0.42174  | 1 | 2267 tags=33%, list=14%, signal=39% |
| GSE36476_YOUNG_VS_OLD_DONOR          | 164   | 0.3218   | 1.0628  | 0.337379 | 0.612873 | 1 | 3144 tags=19%, list=20%, signal=23% | 0.342873  | 1.14292   | 0.152393   | 0.506779 | 1 | 2680 tags=19%, list=17%, signal=22% |
| GSE9006_HEALTHY_VS_TYPE_1_DIAB       | 179   | 0.320294 | 1.06276 | 0.325153 | 0.612551 | 1 | 4141 tags=38%, list=26%, signal=51% | 0.347977  | 1.17541   | 0.13325    | 0.453877 | 1 | 3009 tags=34%, list=19%, signal=41% |
| MONOCARBOXYLIC_ACID_METABOLIT        | 81    | 0.348591 | 1.06273 | 0.334722 | 0.612182 | 1 | 2499 tags=21%, list=16%, signal=25% | 0.391904  | 1.1977    | 0.064238   | 0.431819 | 1 | 2548 tags=27%, list=16%, signal=32% |
| GSE27786_BCELL_VS_NKTCCELL_DN        | 171   | 0.319581 | 1.06266 | 0.3269   | 0.611997 | 1 | 3495 tags=33%, list=22%, signal=41% | 0.331968  | 1.11701   | 0.212687   | 0.541027 | 1 | 2991 tags=28%, list=19%, signal=34% |
| GSE27786_BCELL_VS_NKTCCELL_UP        | 181   | 0.315812 | 1.0624  | 0.328199 | 0.612596 | 1 | 2701 tags=25%, list=17%, signal=30% | 0.333154  | 1.11663   | 0.204082   | 0.541798 | 1 | 3051 tags=32%, list=19%, signal=39% |
| GSE24142_ADULT_VS_FATAL_EARLY_L      | 182   | 0.315642 | 1.06215 | 0.299757 | 0.612954 | 1 | 1604 tags=16%, list=10%, signal=18% | 0.342297  | 1.16053   | 0.145122   | 0.479971 | 1 | 2815 tags=25%, list=18%, signal=30% |
| GSE13306_TREG_VS_TCON_VLPEEN         | 177   | 0.31915  | 1.06193 | 0.343321 | 0.613328 | 1 | 2663 tags=23%, list=17%, signal=27% | -0.329263 | -1.27196  | 0.625455   | 0.358988 | 1 | 2675 tags=29%, list=17%, signal=34% |
| GSE1448_CTRL_VS_AMTI_VBETAS_DP       | 181   | 0.319914 | 1.06135 | 0.33134  | 0.614959 | 1 | 3381 tags=28%, list=21%, signal=35% | 0.347167  | 1.17      | 0.132191   | 0.465726 | 1 | 2555 tags=27%, list=16%, signal=32% |
| CELLULAR_RESPONSE_TO_STIMULUS        | 18    | 0.457555 | 1.061   | 0.399046 | 0.615741 | 1 | 1140 tags=17%, list=7%, signal=18%  | 0.609047  | 1.42208   | 0.0428816  | 0.17039  | 1 | 2551 tags=39%, list=16%, signal=46% |
| GSE7852_LN_VS_THYMUS_TREG_UP         | 166   | 0.321958 | 1.06091 | 0.327228 | 0.615998 | 1 | 3401 tags=33%, list=21%, signal=41% | -0.281439 | -1.07733  | 0.227798   | 0.539638 | 1 | 1786 tags=22%, list=11%, signal=25% |
| GSE26669_CD4_VS_CD8_TCELL_LN_IV      | 182   | 0.319185 | 1.0606  | 0.329146 | 0.616223 | 1 | 2589 tags=23%, list=16%, signal=27% | 0.32085   | 1.08286   | 0.282903   | 0.599305 | 1 | 2667 tags=25%, list=17%, signal=29% |
| GLYCOPROTEIN_BIOSYNTHETIC_PROC       | 71    | 0.358816 | 1.06057 | 0.347398 | 0.615854 | 1 | 3335 tags=32%, list=21%, signal=41% | 0.391458  | 1.1717    | 0.181047   | 0.462546 | 1 | 1598 tags=15%, list=10%, signal=17% |
| GSE32423_IL7_VS_IL7_IL4_MEMORY       | 178   | 0.318572 | 1.06053 | 0.323346 | 0.615498 | 1 | 3319 tags=29%, list=21%, signal=36% | -0.346113 | -1.33138  | 0          | 0.327937 | 1 | 2586 tags=32%, list=16%, signal=38% |
| GSE30083_SP2_VS_SP4_THYMOCYTE        | 172   | 0.320235 | 1.05952 | 0.32177  | 0.618792 | 1 | 3649 tags=27%, list=23%, signal=34% | 0.382688  | 1.28684   | 0.0339623  | 0.30689  | 1 | 2266 tags=16%, list=14%, signal=19% |
| GSE19825_NAIVE_VS_IL2RAHIGH_DA       | 167   | 0.32205  | 1.05923 | 0.344654 | 0.619374 | 1 | 3225 tags=20%, list=20%, signal=24% | -0.325048 | -1.22726  | 0.0432432  | 0.392083 | 1 | 3182 tags=22%, list=20%, signal=27% |
| RESPONSE_TO_ORGANIC_SUBSTANC         | 26    | 0.426682 | 1.05913 | 0.388626 | 0.619284 | 1 | 4914 tags=46%, list=31%, signal=66% | 0.431826  | 1.08441   | 0.343598   | 0.597327 | 1 | 1541 tags=23%, list=10%, signal=25% |
| GSE17721_LPS_VS_GARDIQUIMOD_2        | 178   | 0.318651 | 1.05904 | 0.332518 | 0.619111 | 1 | 3131 tags=25%, list=20%, signal=31% | 0.354232  | 1.1983    | 0.10111    | 0.432501 | 1 | 3550 tags=31%, list=22%, signal=39% |
| GSE17721_CPG_VS_GARDIQUIMOD_1        | 175   | 0.319473 | 1.05886 | 0.341463 | 0.619306 | 1 | 3814 tags=32%, list=24%, signal=42% | 0.356723  | 1.20681   | 0.0909091  | 0.421192 | 1 | 3017 tags=31%, list=19%, signal=38% |
| GSE17721_LPS_VS_POLYIC_24H_BMC       | 184   | 0.316405 | 1.05884 | 0.328144 | 0.618902 | 1 | 3233 tags=27%, list=20%, signal=34% | 0.285554  | 0.965299  | 0.56015    | 0.772907 | 1 | 2974 tags=24%, list=19%, signal=30% |
| PROTEIN_COMPLEX_ASSEMBLY             | 146   | 0.326657 | 1.05879 | 0.334596 | 0.618659 | 1 | 3317 tags=30%, list=21%, signal=38% | 0.254627  | 0.838857  | 0.857868   | 0.915304 | 1 | 2571 tags=20%, list=16%, signal=23% |
| CARBOHYDRATE_TRANSPORT               | 19    | 0.447212 | 1.05839 | 0.3808   | 0.619597 | 1 | 2599 tags=32%, list=16%, signal=38% | 0.370161  | 0.866477  | 0.65042    | 0.895284 | 1 | 320 tags=11%, list=2%, signal=11%   |
| GSE15930_STIM_VS_STIM_AND_IFNA       | 175   | 0.323441 | 1.05823 | 0.344619 | 0.619738 | 1 | 2074 tags=17%, list=13%, signal=19% | 0.321199  | 1.07853   | 0.279716   | 0.60349  | 1 | 3057 tags=24%, list=19%, signal=29% |
| GSE39820_CTRL_VS_TGFBETA1_IL6_C      | 181   | 0.319535 | 1.05822 | 0.33701  | 0.619301 | 1 | 2667 tags=23%, list=17%, signal=27% | -0.256003 | -0.994011 | 0.437126   | 0.667989 | 1 | 2793 tags=31%, list=17%, signal=37% |
| COFACTOR_BIOSYNTHETIC_PROCESS        | 20    | 0.452934 | 1.05812 | 0.384615 | 0.619203 | 1 | 1018 tags=25%, list=6%, signal=27%  | -0.361479 | -0.942003 | 0.553398   | 0.775387 | 1 | 3326 tags=40%, list=21%, signal=50% |
| NEUROTRANSMITTER_RECEPTOR_AC         | 46    | 0.376629 | 1.05777 | 0.362146 | 0.620008 | 1 | 1893 tags=11%, list=12%, signal=12% | 0.279621  | 0.783172  | 0.843703   | 0.969274 | 1 | 4042 tags=17%, list=25%, signal=23% |
| GSE10239_MEMORY_VS_KLRG1INT_E        | 174   | 0.317807 | 1.05765 | 0.326431 | 0.620032 | 1 | 3821 tags=38%, list=24%, signal=49% | 0.309742  | 1.05264   | 0.3275     | 0.657942 | 1 | 2475 tags=25%, list=15%, signal=30% |
| GSE2706_2H_VS_8H_R848_AND_LPS        | 174   | 0.315454 | 1.05702 | 0.334143 | 0.621896 | 1 | 3128 tags=28%, list=19%, signal=35% | 0.290995  | 1.01131   | 0.458073   | 0.726693 | 1 | 3608 tags=35%, list=22%, signal=45% |
| GSE11924_2H_VS_TH17_CD4_TCELL        | 172   | 0.320995 | 1.05674 | 0.336175 | 0.622397 | 1 | 3651 tags=31%, list=23%, signal=39% | 0.190016  | 0.637405  | 1          | 0.997781 | 1 | 5102 tags=32%, list=32%, signal=46% |
| GSE22886_TH1_VS_TH2_48H_ACT_UI       | 174   | 0.319491 | 1.05661 | 0.328818 | 0.622376 | 1 | 2599 tags=21%, list=16%, signal=25% | 0.387562  | 1.30146   | 0.0240506  | 0.284507 | 1 | 3609 tags=26%, list=22%, signal=34% |
| MACROMOLECULAR_COMPLEX_ASSE          | 247   | 0.309788 | 1.05651 | 0.31554  | 0.622311 | 1 | 3425 tags=28%, list=21%, signal=35% | -0.220285 | -0.875699 | 0.930597   | 0.910402 | 1 | 1839 tags=16%, list=11%, signal=18% |
| GSE17721_LPS_VS_POLYIC_1H_BMDI       | 178   | 0.316737 | 1.05618 | 0.345966 | 0.623055 | 1 | 3517 tags=26%, list=22%, signal=33% | 0.323865  | 1.10702   | 0.211302   | 0.554926 | 1 | 3608 tags=28%, list=22%, signal=35% |
| GSE29218_PRE_VS_FLU_VLAY_CDCC5       | 155   | 0.323109 | 1.05613 | 0.333739 | 0.622764 | 1 | 3152 tags=25%, list=20%, signal=30% | 0.352727  | 1.18573   | 0.117061   | 0.445519 | 1 | 3104 tags=22%, list=19%, signal=27% |
| MACROMOLECULE_LOCALIZATION           | 209   | 0.31295  | 1.05567 | 0.319624 | 0.623901 | 1 | 3433 tags=29%, list=21%, signal=37% | 0.262123  | 0.90258   | 0.725749   | 0.851264 | 1 | 2909 tags=23%, list=18%, signal=28% |
| PROTEOLYSIS                          | 168   | 0.319954 | 1.05556 | 0.337709 | 0.623862 | 1 | 3433 tags=29%, list=21%, signal=37% | 0.24949   | 0.844132  | 0.844221   | 0.911904 | 1 | 3344 tags=24%, list=21%, signal=30% |
| GSE14000_UNSTIM_VS_16H_LPS_DC        | 167   | 0.319652 | 1.0554  | 0.329762 | 0.624    | 1 | 2587 tags=24%, list=16%, signal=28% | 0.300682  | 1.00927   | 0.428928   | 0.7282   | 1 | 2846 tags=27%, list=18%, signal=32% |
| GSE32423_IL7_VS_IL7_IL4_NAIVE_CD     | 179</ |          |         |          |          |   |                                     |           |           |            |          |   |                                     |

Supplementary Table 3. Gene enrichment statistics for HD and control monkeys.

|                                 |       |          |         |          |          |   |                                     |           |           |            |          |       |                                     |
|---------------------------------|-------|----------|---------|----------|----------|---|-------------------------------------|-----------|-----------|------------|----------|-------|-------------------------------------|
| GSE22886_DAY1_VS_DAY7_MONOCY    | 180   | 0.318094 | 1.05196 | 0.349091 | 0.628707 | 1 | 3925 tags=34%, list=24%, signal=45% | 0.253209  | 0.852238  | 0.85283    | 0.905716 | 1     | 3500 tags=29%, list=22%, signal=37% |
| GSE3982_BASOPHIL_VS_TH1_DN      | 180   | 0.316605 | 1.05091 | 0.371324 | 0.631942 | 1 | 3582 tags=31%, list=22%, signal=39% | 0.420169  | 1.43483   | 0.00361882 | 1.60516  | 1     | 3609 tags=36%, list=22%, signal=46% |
| GSE1432_IH_VS_6H_IFNG_MICROGL   | 171   | 0.317261 | 1.0507  | 0.360339 | 0.632225 | 1 | 2822 tags=24%, list=18%, signal=29% | 0.290049  | 0.983075  | 0.501211   | 0.754706 | 1     | 2878 tags=27%, list=18%, signal=33% |
| DEFENSE_RESPONSE_TO_BACTERIA    | 20    | 0.446164 | 1.05065 | 0.378931 | 0.631918 | 1 | 3590 tags=35%, list=22%, signal=45% | 0.308648  | 0.738425  | 0.85828    | 0.987883 | 1     | 1950 tags=15%, list=12%, signal=17% |
| GSE17721_POLYIC_VS_PAM3CSK4_6F  | 177   | 0.314515 | 1.05061 | 0.351117 | 0.631632 | 1 | 3186 tags=30%, list=20%, signal=37% | 0.304329  | 1.0293    | 0.377312   | 0.700611 | 1     | 2530 tags=25%, list=16%, signal=30% |
| POSITIVE_REGULATION_OF_MULTICE  | 59    | 0.360923 | 1.05049 | 0.382646 | 0.631642 | 1 | 2318 tags=24%, list=14%, signal=28% | 0.438481  | 1.29416   | 0.080292   | 0.297005 | 1     | 2704 tags=32%, list=17%, signal=39% |
| REGULATION_OF_IMMUNE_RESPONS    | 28    | 0.416115 | 1.05048 | 0.383117 | 0.631189 | 1 | 2184 tags=32%, list=14%, signal=37% | 0.389246  | 0.997061  | 0.552575   | 0.744857 | 1     | 2216 tags=25%, list=14%, signal=29% |
| GSE360_T_GONDI_VS_B_MALAYI_LO   | 174   | 0.318692 | 1.0502  | 0.353448 | 0.631798 | 1 | 2942 tags=25%, list=18%, signal=30% | 0.330111  | 1.10387   | 0.252427   | 0.556129 | 1     | 3644 tags=29%, list=23%, signal=38% |
| GSE3982_BCELL_VS_EFF_MEMORY_C   | 168   | 0.318208 | 1.05018 | 0.352449 | 0.631405 | 1 | 2592 tags=18%, list=16%, signal=21% | 0.269668  | 0.96804   | 0.721739   | 0.864641 | 1     | 3251 tags=23%, list=20%, signal=29% |
| GSE15750_WT_VS_TRAFK6O_DAY10    | 168   | 0.316497 | 1.05011 | 0.34878  | 0.631166 | 1 | 3743 tags=22%, list=23%, signal=28% | 0.246895  | 0.823591  | 0.890644   | 0.932056 | 1     | 4058 tags=20%, list=25%, signal=26% |
| GSE3982_BCELL_VS_NKCELL_DN      | 160   | 0.316846 | 1.05011 | 0.356098 | 0.630716 | 1 | 3197 tags=23%, list=20%, signal=29% | 0.297635  | 0.992926  | 0.686992   | 0.749528 | 1     | 3169 tags=21%, list=20%, signal=26% |
| NEGATIVE_REGULATION_OF_CELL_CY  | 72    | 0.352964 | 1.05009 | 0.359833 | 0.630306 | 1 | 2458 tags=25%, list=15%, signal=29% | -0.262162 | -0.866524 | 0.719298   | 0.891833 | 1     | 1584 tags=17%, list=10%, signal=18% |
| GSE29618_PRE_VS_DAY7_FLU_VACCI  | 165   | 0.319789 | 1.04999 | 0.325898 | 0.630206 | 1 | 2151 tags=19%, list=13%, signal=21% | 0.336543  | 1.11735   | 0.220443   | 0.54204  | 1     | 3363 tags=32%, list=21%, signal=40% |
| GSE11864_CSF1_PAM3CY5_VS_CSF1   | 156   | 0.319867 | 1.04983 | 0.338217 | 0.630346 | 1 | 3367 tags=32%, list=21%, signal=40% | 0.328138  | 1.09657   | 0.261364   | 0.568689 | 1     | 2826 tags=28%, list=18%, signal=34% |
| GSE17721_POLYIC_VS_CPG_12H_BMI  | 177   | 0.316301 | 1.0493  | 0.368675 | 0.631842 | 1 | 3045 tags=27%, list=19%, signal=33% | 0.287916  | 0.965216  | 0.53706    | 0.772685 | 1     | 3469 tags=30%, list=22%, signal=38% |
| GSE1432_CTRL_VS_IFNG_6H_MICROCR | 172   | 0.316069 | 1.04882 | 0.335784 | 0.633105 | 1 | 3214 tags=32%, list=20%, signal=40% | 0.283941  | 0.953831  | 0.569667   | 0.781763 | 1     | 2966 tags=26%, list=18%, signal=32% |
| GSE29618_PRE_VS_DAY7_FLU_VACCI  | 171   | 0.317598 | 1.04881 | 0.34303  | 0.632691 | 1 | 2458 tags=23%, list=15%, signal=27% | -0.281684 | -1.08118  | 0.198068   | 0.53855  | 1     | 2663 tags=31%, list=17%, signal=37% |
| CALCIUM_MEDIATED_SIGNALING      | 15    | 0.464626 | 1.0485  | 0.400332 | 0.633305 | 1 | 3804 tags=60%, list=24%, signal=79% | 0.476033  | 1.09      | 0.341098   | 0.582871 | 1     | 2514 tags=33%, list=16%, signal=39% |
| GSE39820_TGFBETA1_VS_TGFBETA3   | 170   | 0.318038 | 1.04847 | 0.342823 | 0.632946 | 1 | 2252 tags=21%, list=14%, signal=24% | 0.304089  | 1.02368   | 0.409147   | 0.704479 | 1     | 2546 tags=23%, list=16%, signal=27% |
| GSE27786_NEUTROPHIL_VS_MONO_I   | 180   | 0.312826 | 1.04821 | 0.34398  | 0.633394 | 1 | 2887 tags=24%, list=18%, signal=29% | 0.31583   | 1.05378   | 0.350746   | 0.657115 | 1     | 2437 tags=22%, list=15%, signal=26% |
| GSE3982_MAC_VS_TH1_DN           | 173   | 0.314882 | 1.04816 | 0.354567 | 0.633097 | 1 | 3534 tags=31%, list=22%, signal=40% | 0.407427  | 1.37434   | 0.00758534 | 0.213804 | 1     | 2802 tags=31%, list=17%, signal=37% |
| GSE17721_CTRL_VS_LPS_8H_BMDM    | 175   | 0.316843 | 1.04814 | 0.339004 | 0.632733 | 1 | 2952 tags=20%, list=18%, signal=24% | 0.30505   | 1.02939   | 0.378213   | 0.700863 | 1     | 3444 tags=25%, list=21%, signal=32% |
| GSE17974_IL4_AND_ANTI_IL12_VS_U | 147   | 0.322871 | 1.04811 | 0.353015 | 0.632372 | 1 | 3555 tags=35%, list=22%, signal=45% | 0.442072  | 1.4758    | 0          | 0.137251 | 1     | 3485 tags=41%, list=21%, signal=52% |
| PROTEIN_TARGETING               | 96    | 0.338033 | 1.04807 | 0.368421 | 0.632055 | 1 | 3230 tags=29%, list=20%, signal=36% | -0.243828 | -0.869102 | 0.82963    | 0.917108 | 1     | 2810 tags=28%, list=18%, signal=34% |
| GSE20715_OH_VS_24H_OZONE_LUNC   | 176   | 0.314758 | 1.04807 | 0.356971 | 0.631599 | 1 | 3615 tags=32%, list=23%, signal=41% | 0.278167  | 0.941046  | 0.610487   | 0.800327 | 1     | 2075 tags=19%, list=13%, signal=22% |
| GSE17721_LPS_VS_POLYIC_0.5H_BMI | 175   | 0.316133 | 1.04787 | 0.332521 | 0.631904 | 1 | 2841 tags=22%, list=18%, signal=26% | 0.353813  | 1.19565   | 0.105721   | 0.433627 | 1     | 3297 tags=29%, list=21%, signal=36% |
| GSE15324_NAIVE_VS_ACTIVATED_ELI | 182   | 0.312745 | 1.04777 | 0.355664 | 0.631829 | 1 | 2157 tags=20%, list=13%, signal=23% | 0.283147  | 0.958106  | 0.579336   | 0.778138 | 1     | 2110 tags=19%, list=13%, signal=21% |
| GSE360_T_GONDI_VS_M_TUBERCUL    | 173   | 0.313078 | 1.04751 | 0.353939 | 0.632226 | 1 | 2327 tags=19%, list=14%, signal=22% | 0.394511  | 1.32932   | 0.021235   | 0.262381 | 1     | 2947 tags=32%, list=18%, signal=39% |
| GSE17721_CPG_VS_GARDIQUIMOD_I   | 171   | 0.317507 | 1.04738 | 0.351351 | 0.632288 | 1 | 3167 tags=25%, list=20%, signal=30% | 0.320309  | 1.07988   | 0.297092   | 0.602778 | 1     | 1571 tags=15%, list=10%, signal=16% |
| NEGATIVE_REGULATION_OF_CELLUL   | 27    | 0.40699  | 1.04734 | 0.394578 | 0.631978 | 1 | 3890 tags=41%, list=24%, signal=54% | 0.519868  | 1.32415   | 0.091047   | 0.268165 | 1     | 2711 tags=37%, list=17%, signal=44% |
| SECRETION_BY_CELL               | 108   | 0.33319  | 1.04717 | 0.34749  | 0.632101 | 1 | 3134 tags=29%, list=20%, signal=35% | 0.367888  | 1.18149   | 0.153642   | 0.448906 | 1     | 2919 tags=27%, list=18%, signal=33% |
| GSE7460_WT_VS_FOXP3_HET_ACT_V   | 172   | 0.315356 | 1.04710 | 0.360451 | 0.631906 | 1 | 3306 tags=28%, list=21%, signal=35% | 0.336973  | 1.13669   | 0.196782   | 0.516171 | 1     | 2682 tags=26%, list=17%, signal=31% |
| GSE17721_CTRL_VS_CPG_8H_BMDM    | 180   | 0.315219 | 1.04669 | 0.35732  | 0.632128 | 1 | 3949 tags=34%, list=25%, signal=44% | 0.278235  | 0.939211  | 0.608589   | 0.800233 | 1     | 3498 tags=26%, list=22%, signal=33% |
| GSE17721_CTRL_VS_LPS_2H_BMDM    | 178   | 0.317183 | 1.04665 | 0.365291 | 0.632518 | 1 | 3493 tags=25%, list=22%, signal=31% | 0.256348  | 0.859765  | 0.789535   | 0.898813 | 1     | 3512 tags=26%, list=22%, signal=33% |
| GSE39_IX_VIVO_VS_IN_CULTURE_C   | 180   | 0.312887 | 1.04664 | 0.338554 | 0.632105 | 1 | 2644 tags=22%, list=16%, signal=26% | 0.307004  | 1.04518   | 0.345528   | 0.675413 | 1     | 4001 tags=33%, list=25%, signal=44% |
| MICROTUBULE_BASED_PROCESS       | 73    | 0.350073 | 1.0465  | 0.369444 | 0.632142 | 1 | 1350 tags=15%, list=8%, signal=16%  | 0.394396  | 1.20351   | 0.146263   | 0.425785 | 1     | 3744 tags=37%, list=23%, signal=48% |
| GSE17974_IL4_AND_ANTI_IL12_VS_U | 152   | 0.320569 | 1.04567 | 0.365824 | 0.634602 | 1 | 3103 tags=28%, list=19%, signal=34% | -0.258133 | -0.985586 | 0.507389   | 0.683846 | 1     | 2461 tags=20%, list=15%, signal=23% |
| GSE24634_IL4_VS_CTRL_TREATED_N  | 174   | 0.316036 | 1.04563 | 0.365707 | 0.634326 | 1 | 2581 tags=25%, list=16%, signal=29% | 0.350229  | 1.19046   | 0.118727   | 0.439246 | 1     | 3488 tags=35%, list=22%, signal=44% |
| GSE7852_TREG_VS_TCONV_THYMU     | 175   | 0.313756 | 1.0452  | 0.359511 | 0.63542  | 1 | 2686 tags=22%, list=17%, signal=26% | -0.341247 | -1.32096  | 0.0103093  | 0.345006 | 1     | 2683 tags=27%, list=17%, signal=37% |
| GSE360_HIGH_VS_LOW_DOSE_B_MA    | 180   | 0.315492 | 1.04509 | 0.346618 | 0.635322 | 1 | 4188 tags=36%, list=26%, signal=48% | 0.413483  | 1.38731   | 0.00955794 | 0.200127 | 1     | 3471 tags=37%, list=22%, signal=46% |
| GOLDRATH_NAIVE_VS_MEMORY_CD     | 177   | 0.314777 | 1.04484 | 0.344242 | 0.635799 | 1 | 3055 tags=30%, list=19%, signal=37% | 0.314863  | 1.06186   | 0.530073   | 0.641507 | 1     | 2606 tags=27%, list=16%, signal=32% |
| GSE39820_CTRL_VS_IL1B_IL6_IL23A | 187   | 0.313062 | 1.04476 | 0.368165 | 0.635659 | 1 | 2813 tags=26%, list=18%, signal=31% | 0.29775   | 1.01087   | 0.432161   | 0.726076 | 1     | 3273 tags=31%, list=20%, signal=39% |
| GSE9988_LPS_VS_CTRL_TREATED_MC  | 171   | 0.31033  | 1.04473 | 0.348808 | 0.635312 | 1 | 3208 tags=29%, list=20%, signal=36% | 0.371059  | 1.2476    | 0.0491184  | 0.362138 | 1     | 2434 tags=29%, list=15%, signal=34% |
| GSE27786_LSK_VS_LIN_NEG_CELL_D  | 177   | 0.313542 | 1.04467 | 0.347138 | 0.635073 | 1 | 3870 tags=33%, list=24%, signal=43% | 0.264601  | 0.894041  | 0.73875    | 0.864946 | 1     | 2088 tags=19%, list=13%, signal=19% |
| DNA_DAMAGE_RESPONSESIGNALING    | 31    | 0.405194 | 1.04366 | 0.391036 | 0.632807 | 1 | 3939 tags=45%, list=25%, signal=60% | -0.184443 | -0.91325  | 0.611413   | 0.836272 | 1     | 2805 tags=27%, list=17%, signal=35% |
| GSE17721_0.5H_VS_4H_POLYIC_BMC  | 183   | 0.312992 | 1.04352 | 0.35206  | 0.638401 | 1 | 3279 tags=29%, list=20%, signal=36% | 0.283864  | 0.9635    | 0.56801    | 0.773834 | 1     | 3258 tags=28%, list=20%, signal=35% |
| GSE17721_POLYIC_VS_GARDIQUIMOD  | 174   | 0.316826 | 1.04305 | 0.365501 | 0.639651 | 1 | 2983 tags=25%, list=19%, signal=30% | 0.287756  | 0.965374  | 0.552975   | 0.77316  | 1     | 3456 tags=29%, list=22%, signal=37% |
| HEMOPHORESIS                    | 66    | 0.352429 | 1.04259 | 0.386779 | 0.640807 | 1 | 2427 tags=23%, list=15%, signal=27% | 0.309243  | 0.921225  | 0.599419   | 0.827138 | 1     | 2667 tags=27%, list=17%, signal=33% |
| GSE17721_PAM3CSK4_VS_CPG_12H    | 183   | 0.311618 | 1.04198 | 0.367521 | 0.64259  | 1 | 2820 tags=24%, list=18%, signal=29% | -0.244888 | -0.951079 | 0.610256   | 0.76649  | 1     | 3177 tags=29%, list=20%, signal=36% |
| GSE36476_CTRL_VS_TSST_ACT_40H_I | 167   | 0.31526  | 1.04176 | 0.379352 | 0.642913 | 1 | 3458 tags=33%, list=22%, signal=42% | -0.404544 | -1.5372   | 0          | 0.310915 | 0.996 | 2384 tags=37%, list=15%, signal=42% |
| PROTEIN_TRANSPORT               | 138   | 0.321617 | 1.04159 | 0.358134 | 0.643123 | 1 | 3499 tags=30%, list=22%, signal=39% | -0.275417 | -1.02817  | 0.337255   | 0.614826 | 1     | 2819 tags=30%, list=18%, signal=37% |
| POLYSACCHARIDE_METABOLIC_PROC   | 16    | 0.465007 | 1.04115 | 0.412564 | 0.644231 | 1 | 1708 tags=25%, list=11%, signal=28% | 0.386908  | 0.874023  | 0.633731   | 0.890267 | 1     | 2133 tags=38%, list=13%, signal=43% |
| GSE17721_CTRL_VS_POLYIC_8H_BMI  | 181   | 0.312737 | 1.04097 | 0.37637  | 0.644404 | 1 | 2633 tags=23%, list=16%, signal=27% | 0.328306  | 1.10613   | 0.231156   | 0.554871 | 1     | 3569 tags=36%, list=22%, signal=46% |
| GSE17721_LPS_VS_CPG_6H_BMDM_I   | 182   | 0.312384 | 1.04066 | 0.367981 | 0.645063 | 1 | 3198 tags=24%, list=20%, signal=30% | 0.3391    | 1.14554   | 0.164331   | 0.500056 | 1     | 3488 tags=31%, list=22%, signal=40% |
| GSE17974_OH_VS_72H_IN_VITRO_AC  | 164   | 0.319074 | 1.04059 | 0.368675 | 0.644889 | 1 | 1990 tags=22%, list=12%, signal=25% | -0.275383 | -1.0451   | 0.338164   | 0.591866 | 1     | 2462 tags=25%, list=15%, signal=29% |
| GSE13484_UNSTIM_VS_3H_YF17D_V   | 175   | 0.313928 | 1.04048 | 0.388206 | 0.644804 | 1 | 3812 tags=34%, list=24%, signal=44% | -0.226549 | -0.868186 | 0.947115   | 0.917777 | 1     | 1716 tags=15%, list=11%, signal=16% |
| POSITIVE_REGULATION_OF_CYTOKIN  | 25    | 0.416612 | 1.04014 | 0.387755 | 0.645566 | 1 | 3461 tags=44%, list=22%, signal=56% | -0.295003 | -0.818881 | 0.78961    | 0.980061 | 1     | 3388 tags=36%, list=21%, signal=46% |
| GSE19825_NAIVE_VS_IL2RALOW_DA   | 166   | 0.318746 | 1.03985 | 0.372839 | 0.646122 | 1 | 2931 tags=25%, list=18%, signal=31% | 0.343534  | 1.16029   | 0.144291   | 0.480203 | 1     | 1964 tags=20%, list=12%, signal=23% |
| GSE17721_LPS_VS_POLYIC_6H_BMD   | 181   | 0.309223 | 1.03957 | 0.355231 | 0.64673  | 1 | 3378 tags=28%, list=21%, signal=35% | 0.321103  | 1.07859   | 0.287688   | 0.604377 | 1     | 3135 tags=33%, list=20%, signal=40% |
| GSE9650_EFFECTOR_VS_EXHAUSTED   | 186   | 0.310093 | 1.03937 | 0.37851  | 0.646974 | 1 | 2622 tags=22%, list=16%, signal=25% | 0.369431  | 1.25929   | 0.0522479  | 0.34462  | 1     | 2516 tags=27%, list=16%, signal=32% |
| GSE17721_LPS_VS_CPG_2H_BMDM_I   | 182   | 0.313493 | 1.0393  | 0.3753   | 0.646791 | 1 | 1646 tags=16%, list=10%, signal=18% | 0.312874  | 1.06123   | 0.642822   | 0.642822 | 1     | 3153 tags=27%, list=20%, signal=34% |
| GSE3982_EFF_MEMORY_VS_CENT_M    | 160   | 0.317855 | 1.03926 | 0.375    | 0.6465   | 1 | 2866 tags=22%, list=18%, signal=26% | -0.290589 | -1.08254  | 0.204082   | 0.544662 | 1     | 2333 tags=23%, list=15%, signal=26% |
| GSE17721_CTRL_VS_GARDIQUIMOD    | 170   | 0.314011 | 1.03918 | 0.372236 | 0.646321 | 1 | 2640 tags=22%, list=16%, signal=26% | 0.290581  | 0.97253   | 0.5325     | 0.77038  | 1     | 3137 tags=26%, list=20%, signal=32% |
| NEUROLOGICAL_SYSTEM_PROCESS     | 343   | 0.296059 | 1.03886 | 0.346501 | 0.64702  | 1 | 3155 tags=16%, list=20%, signal=20% | 0.209546  | 0.744488  | 0.99774    | 0.985297 | 1     | 3038 tags=12%, list=19%, signal=14% |
| GSE17721_CPG_VS_GARDIQUIMOD_I   | 180</ |          |         |          |          |   |                                     |           |           |            |          |       |                                     |

Supplementary Table 3. Gene enrichment statistics for HD and control monkeys.

|                                  |     |            |         |          |          |   |                                     |           |           |            |           |       |                                     |
|----------------------------------|-----|------------|---------|----------|----------|---|-------------------------------------|-----------|-----------|------------|-----------|-------|-------------------------------------|
| GSE17721_CPG_VS_GARDIQUMOD_      | 172 | 0.309993   | 1.03209 | 0.394673 | 0.66364  | 1 | 3126 tags=26%, list=19%, signal=31% | 0.249014  | 0.833209  | 0.858173   | 0.922793  | 1     | 3717 tags=30%, list=23%, signal=39% |
| GSE13306_LAMINA_PROPRIA_VS_SPL   | 167 | 0.314121   | 1.03156 | 0.380124 | 0.66507  | 1 | 2349 tags=20%, list=15%, signal=24% | 0.311555  | 1.05423   | 0.33376    | 0.656483  | 1     | 3433 tags=26%, list=21%, signal=32% |
| REPLICATION_FORK                 | 16  | 0.460079   | 1.03144 | 0.42     | 0.665024 | 1 | 3251 tags=44%, list=20%, signal=55% | 0.421172  | 0.968647  | 0.497545   | 0.774845  | 1     | 2228 tags=44%, list=14%, signal=51% |
| GSE13485_DAY1_VS_DAY21_YF17D_1   | 153 | 0.31378    | 1.03131 | 0.394969 | 0.665006 | 1 | 2145 tags=23%, list=13%, signal=26% | 0.392733  | 1.29374   | 0.0344828  | 0.29663   | 1     | 3527 tags=37%, list=22%, signal=46% |
| GSE22886_CTRL_VS_LPS_24H_DC_UP   | 184 | 0.308055   | 1.03104 | 0.398252 | 0.665518 | 1 | 3419 tags=33%, list=21%, signal=42% | -0.281521 | -1.09804  | 0.162921   | 0.524472  | 1     | 2771 tags=33%, list=17%, signal=40% |
| GSE17721_CTRL_VS_LPS_12H_BMDM    | 176 | 0.309448   | 1.03104 | 0.397327 | 0.665059 | 1 | 4335 tags=37%, list=27%, signal=50% | 0.316155  | 1.06796   | 0.312195   | 0.627887  | 1     | 2595 tags=20%, list=16%, signal=30% |
| GSE27786_NKCELL_VS_NEUTROPHIL    | 182 | 0.313535   | 1.03097 | 0.398551 | 0.664876 | 1 | 2727 tags=24%, list=17%, signal=28% | 0.277751  | 0.935331  | 0.638736   | 0.804697  | 1     | 3002 tags=25%, list=19%, signal=23% |
| GSE17721_POLYIC_VS_CPG_16H_BMI   | 178 | 0.311763   | 1.03087 | 0.393682 | 0.664753 | 1 | 2906 tags=25%, list=18%, signal=30% | 0.288756  | 0.972641  | 0.534568   | 0.77106   | 1     | 3537 tags=30%, list=22%, signal=38% |
| HEMOPOIETIC_OR_LYMPHOID_ORGA     | 67  | 0.349278   | 1.03063 | 0.409471 | 0.665103 | 1 | 2427 tags=22%, list=15%, signal=26% | 0.319632  | 0.93945   | 0.629619   | 0.799663  | 1     | 2667 tags=28%, list=17%, signal=34% |
| TUBULIN_BINDING                  | 41  | 0.379928   | 1.03057 | 0.405248 | 0.664867 | 1 | 4261 tags=44%, list=27%, signal=60% | 0.305482  | 0.848091  | 0.738601   | 0.911252  | 1     | 2841 tags=20%, list=18%, signal=34% |
| GSE30083_SP1_VS_SP3_THYMOCYTE    | 172 | 0.307856   | 1.03024 | 0.396766 | 0.665583 | 1 | 3179 tags=27%, list=20%, signal=34% | 0.297771  | 0.998262  | 0.475248   | 0.743176  | 1     | 3011 tags=25%, list=19%, signal=20% |
| GSE17721_LPS_VS_PAM3CSK4_12H_1   | 174 | 0.310489   | 1.02996 | 0.393325 | 0.666117 | 1 | 3079 tags=25%, list=19%, signal=31% | 0.333286  | 1.12252   | 0.211735   | 0.533116  | 1     | 3875 tags=35%, list=24%, signal=46% |
| GSE17721_CTRL_VS_POLYIC_8H_BMC   | 176 | 0.310651   | 1.0298  | 0.388134 | 0.666228 | 1 | 3364 tags=27%, list=21%, signal=33% | 0.290059  | 0.985526  | 0.5        | 0.750332  | 1     | 2021 tags=16%, list=13%, signal=18% |
| CENTROSOME                       | 49  | 0.362307   | 1.0296  | 0.403927 | 0.666471 | 1 | 4272 tags=47%, list=27%, signal=64% | 0.485103  | 1.38971   | 0.0436747  | 0.200771  | 1     | 2569 tags=35%, list=16%, signal=41% |
| GSE17721_POLYIC_VS_PAM3CSK4_1E   | 176 | 0.308823   | 1.02937 | 0.390097 | 0.666876 | 1 | 3055 tags=27%, list=19%, signal=33% | 0.283319  | 0.956488  | 0.567702   | 0.778968  | 1     | 3429 tags=32%, list=21%, signal=24% |
| GSE3982_CTRL_VS_LPS_4H_MAC_DN    | 174 | 0.311255   | 1.02933 | 0.381127 | 0.666551 | 1 | 3685 tags=32%, list=23%, signal=41% | -0.29532  | -1.15138  | 0.08       | 0.466399  | 1     | 1867 tags=22%, list=12%, signal=24% |
| POLYSACCHARIDE_BINDING           | 31  | 0.400667   | 1.02903 | 0.430793 | 0.667258 | 1 | 1019 tags=16%, list=6%, signal=17%  | -0.39606  | -1.14864  | 0.228261   | 0.466133  | 1     | 1598 tags=19%, list=10%, signal=21% |
| GSE14000_UNSTIM_VS_16H_LPS_DC    | 177 | 0.309886   | 1.02887 | 0.379762 | 0.667358 | 1 | 3147 tags=31%, list=20%, signal=38% | 0.332988  | 1.13404   | 0.17402    | 0.516675  | 1     | 2738 tags=29%, list=17%, signal=35% |
| GSE22886_UNSTIM_VS_IL2_STIM_NK   | 163 | 0.316085   | 1.02834 | 0.385876 | 0.668802 | 1 | 4052 tags=35%, list=25%, signal=46% | 0.280593  | 0.949575  | 0.600506   | 0.872723  | 1     | 2102 tags=26%, list=13%, signal=24% |
| CELLULAR_COMPONENT_ASSEMBLY      | 263 | 0.29901    | 1.02806 | 0.401368 | 0.669317 | 1 | 3425 tags=27%, list=21%, signal=33% | 0.225055  | 0.782585  | 0.977354   | 0.96863   | 1     | 2246 tags=16%, list=14%, signal=19% |
| GSE32423_MEMORY_VS_NAIVE_CD8     | 175 | 0.307056   | 1.02805 | 0.395291 | 0.668869 | 1 | 3295 tags=27%, list=21%, signal=34% | -0.311618 | -1.19581  | 0.0533981  | 0.430685  | 1     | 2907 tags=27%, list=18%, signal=33% |
| KINETOCHORE                      | 24  | 0.416722   | 1.02772 | 0.433225 | 0.669626 | 1 | 3086 tags=33%, list=19%, signal=41% | 0.421547  | 1.03138   | 0.434713   | 0.696725  | 1     | 2412 tags=33%, list=15%, signal=39% |
| GSE2706_UNSTIM_VS_2H_LPS_DC_U    | 145 | 0.316346   | 1.02767 | 0.401741 | 0.66934  | 1 | 2811 tags=28%, list=18%, signal=33% | 0.369064  | 1.22727   | 0.0848101  | 0.387516  | 1     | 3067 tags=30%, list=19%, signal=36% |
| GSE3982_EFF_MEMORY_CD4_TCELL     | 169 | 0.310806   | 1.02748 | 0.405237 | 0.669528 | 1 | 2045 tags=18%, list=13%, signal=20% | -0.305153 | -1.17783  | 0.0721154  | 0.445312  | 1     | 2211 tags=23%, list=14%, signal=26% |
| GSE17721_CTRL_VS_PAM3CSK4_24H    | 179 | 0.307749   | 1.02739 | 0.41     | 0.669377 | 1 | 4385 tags=36%, list=27%, signal=49% | 0.300321  | 1.0123    | 0.426966   | 0.726898  | 1     | 2944 tags=24%, list=18%, signal=29% |
| GSE17721_LPS_VS_CPG_24H_BMDM     | 175 | 0.310825   | 1.02726 | 0.405797 | 0.669373 | 1 | 2536 tags=19%, list=16%, signal=22% | 0.341052  | 1.1601    | 0.160736   | 0.480349  | 1     | 2926 tags=26%, list=18%, signal=31% |
| GSE360_CTRL_VS_LPS_DOMOVANI_DC   | 176 | 0.309582   | 1.02722 | 0.420097 | 0.669309 | 1 | 3523 tags=33%, list=22%, signal=42% | 0.339147  | 1.14041   | 0.183063   | 0.510726  | 1     | 2429 tags=26%, list=15%, signal=30% |
| GSE19825_NAIVE_VS_IL2RALOW_DAI   | 180 | 0.310355   | 1.02702 | 0.405978 | 0.669264 | 1 | 3119 tags=15%, list=19%, signal=18% | -0.281418 | -1.07951  | 0.169811   | 0.53886   | 1     | 2865 tags=18%, list=18%, signal=22% |
| GSE17721_LPS_VS_PAM3CSK4_4H_BI   | 178 | 0.303808   | 1.0262  | 0.387931 | 0.671746 | 1 | 3941 tags=33%, list=25%, signal=43% | 0.253131  | 0.855866  | 0.832313   | 0.904129  | 1     | 2533 tags=24%, list=16%, signal=28% |
| NUCLEOTIDE_BIOSYNTHETIC_PROCES   | 17  | 0.462073   | 1.02619 | 0.445561 | 0.671322 | 1 | 3516 tags=47%, list=22%, signal=60% | 0.413782  | 0.949129  | 0.528109   | 0.788266  | 1     | 1419 tags=12%, list=9%, signal=13%  |
| REGULATION_OF_HYDROLASE_ACTIV    | 72  | 0.339623   | 1.02617 | 0.408392 | 0.670947 | 1 | 3480 tags=31%, list=22%, signal=39% | 0.316476  | 0.951503  | 0.568245   | 0.784565  | 1     | 2549 tags=19%, list=16%, signal=23% |
| HOMEOSTASIS_OF_NUMBER_OF_CEL     | 19  | 0.440314   | 1.02587 | 0.444089 | 0.67151  | 1 | 4929 tags=58%, list=31%, signal=83% | -0.514688 | -1.28354  | 0.137566   | 0.352899  | 1     | 1817 tags=42%, list=11%, signal=47% |
| GSE27786_LSK_VS_NKCELL_UP        | 173 | 0.310315   | 1.02581 | 0.413751 | 0.671275 | 1 | 3276 tags=30%, list=20%, signal=37% | 0.460108  | 1.56207   | 0          | 0.0941256 | 1     | 2346 tags=27%, list=15%, signal=31% |
| REGULATION_OF_ACTION_POTENTIAL   | 17  | 0.44613    | 1.02572 | 0.418301 | 0.671154 | 1 | 1082 tags=12%, list=7%, signal=13%  | 0.4406    | 1.02595   | 0.412069   | 0.702136  | 1     | 1436 tags=24%, list=9%, signal=26%  |
| GSE22886_DAY1_VS_DAY7_MONOCY     | 174 | 0.307702   | 1.02548 | 0.404882 | 0.671523 | 1 | 3414 tags=30%, list=21%, signal=38% | -0.242271 | -0.935963 | 0.733333   | 0.787703  | 1     | 2489 tags=21%, list=16%, signal=25% |
| GSE14769_UNSTIM_VS_60MIN_LPS_I   | 174 | 0.309559   | 1.0254  | 0.405172 | 0.671331 | 1 | 4313 tags=38%, list=27%, signal=51% | 0.300477  | 1.00944   | 0.43309    | 0.728123  | 1     | 3941 tags=32%, list=25%, signal=41% |
| INTRACELLULAR_PROTEIN_TRANSPOF   | 127 | 0.316432   | 1.02528 | 0.414343 | 0.671346 | 1 | 3499 tags=30%, list=22%, signal=38% | -0.258296 | -0.961148 | 0.545064   | 0.745972  | 1     | 2819 tags=30%, list=18%, signal=36% |
| EXOCYTOSIS                       | 23  | 0.418655   | 1.0251  | 0.435563 | 0.671534 | 1 | 2950 tags=26%, list=18%, signal=32% | 0.331951  | 0.82161   | 0.761453   | 0.935777  | 1     | 2369 tags=17%, list=15%, signal=20% |
| GSE14769_UNSTIM_VS_40MIN_LPS_I   | 175 | 0.309151   | 1.02483 | 0.418773 | 0.672038 | 1 | 2580 tags=27%, list=16%, signal=32% | 0.272921  | 0.916117  | 0.693774   | 0.833438  | 1     | 2019 tags=17%, list=13%, signal=19% |
| GSE17721_LPS_VS_GARDIQUMOD_4     | 183 | 0.304851   | 1.02464 | 0.425273 | 0.672256 | 1 | 2742 tags=21%, list=17%, signal=25% | 0.278992  | 0.939837  | 0.612624   | 0.800247  | 1     | 3408 tags=27%, list=21%, signal=34% |
| GSE3982_BCELL_VS_NKCELL_UP       | 168 | 0.311155   | 1.02321 | 0.426844 | 0.676839 | 1 | 2997 tags=28%, list=19%, signal=34% | 0.291888  | 0.984274  | 0.494111   | 0.752692  | 1     | 3048 tags=20%, list=12%, signal=23% |
| GSE7460_WT_VS_FOXP3_HET_ACT_T    | 172 | 0.311915   | 1.02264 | 0.42204  | 0.678405 | 1 | 1939 tags=18%, list=12%, signal=20% | 0.265461  | 0.892887  | 0.723965   | 0.866195  | 1     | 3600 tags=27%, list=22%, signal=35% |
| GSE8384_CTRL_VS_B_ABORTUS_4H_I   | 178 | 0.309821   | 1.02244 | 0.411043 | 0.678625 | 1 | 2750 tags=25%, list=17%, signal=30% | 0.393562  | 1.32633   | 0.0232558  | 0.265083  | 1     | 3428 tags=38%, list=21%, signal=47% |
| GSE22045_TREG_VS_TCONV_DN        | 154 | 0.308378   | 1.02226 | 0.413709 | 0.678853 | 1 | 2771 tags=25%, list=17%, signal=30% | 0.271729  | 0.901737  | 0.716456   | 0.851798  | 1     | 2586 tags=23%, list=16%, signal=27% |
| GSE11864_UNTREATED_VS_CSF1_IN    | 169 | 0.310725   | 1.02214 | 0.425558 | 0.678838 | 1 | 4028 tags=35%, list=25%, signal=46% | 0.367038  | 1.22787   | 0.0725707  | 0.386214  | 1     | 3520 tags=31%, list=22%, signal=46% |
| GSE15930_NAIVE_VS_48H_IN_VITRO   | 183 | 0.307845   | 1.0217  | 0.436054 | 0.679984 | 1 | 3058 tags=26%, list=19%, signal=31% | 0.486553  | 1.64495   | 0          | 0.0684313 | 0.909 | 2637 tags=38%, list=16%, signal=45% |
| HYDROXYCYCLE_METABOLIC_PROCES    | 23  | 0.417551   | 1.02164 | 0.452033 | 0.679936 | 1 | 2066 tags=30%, list=13%, signal=35% | -0.421381 | -1.13559  | 0.258856   | 0.468284  | 1     | 3150 tags=48%, list=20%, signal=59% |
| DIACETYLATION_OF_TRANSMEMBRANE   | 25  | 0.407929   | 1.02156 | 0.409375 | 0.679574 | 1 | 1966 tags=20%, list=12%, signal=23% | 0.30133   | 0.752682  | 0.835548   | 0.981557  | 1     | 2117 tags=20%, list=13%, signal=23% |
| GSE36392_EOSINOPHIL_VS_MAC_IL2   | 178 | 0.305809   | 1.0214  | 0.404412 | 0.679687 | 1 | 2571 tags=24%, list=16%, signal=28% | 0.284431  | 0.95964   | 0.552296   | 0.777011  | 1     | 2976 tags=26%, list=19%, signal=37% |
| GSE34205_HEALTHY_VS_FLU_INF_INF  | 177 | 0.307539   | 1.02137 | 0.425091 | 0.679334 | 1 | 3108 tags=28%, list=19%, signal=35% | 0.401862  | 1.3524    | 0.0136646  | 0.237687  | 1     | 2684 tags=31%, list=17%, signal=31% |
| GSE18791_CTRL_VS_NEWCASTLE_VIR   | 166 | 0.309063   | 1.02125 | 0.426844 | 0.679319 | 1 | 3380 tags=31%, list=21%, signal=39% | 0.332739  | 1.12297   | 0.206683   | 0.533246  | 1     | 2778 tags=28%, list=17%, signal=34% |
| GSE17721_CTRL_VS_PAM3CSK4_12H    | 178 | 0.308408   | 1.02103 | 0.422466 | 0.679637 | 1 | 3102 tags=28%, list=19%, signal=34% | -0.253979 | -0.96314  | 0.555556   | 0.738612  | 1     | 2348 tags=25%, list=15%, signal=29% |
| PHOSPHOLIPASE_ACTIVITY           | 41  | 0.373309   | 1.02085 | 0.431496 | 0.679769 | 1 | 1778 tags=17%, list=11%, signal=19% | 0.493995  | 1.37869   | 0.0460624  | 0.207225  | 1     | 1677 tags=22%, list=10%, signal=24% |
| GOLGI_APPARATUS                  | 204 | 0.299708   | 1.02051 | 0.409739 | 0.680507 | 1 | 3919 tags=31%, list=24%, signal=41% | 0.387271  | 1.33141   | 0.0159314  | 0.261904  | 1     | 3633 tags=38%, list=23%, signal=49% |
| GSE17974_CTRL_VS_ACT_IL4_AND_A   | 157 | 0.313182   | 1.0203  | 0.442038 | 0.680781 | 1 | 2739 tags=24%, list=17%, signal=29% | -0.29393  | -1.10841  | 0.158416   | 0.512695  | 1     | 1938 tags=22%, list=12%, signal=24% |
| GSE360_CTRL_VS_B_MALAYI_LOW_D    | 171 | 0.308411   | 1.02026 | 0.423171 | 0.680458 | 1 | 3957 tags=29%, list=25%, signal=38% | 0.327809  | 1.09215   | 0.254729   | 0.578755  | 1     | 4167 tags=36%, list=26%, signal=48% |
| UBIQUITIN_PROTEIN_LIGASE_ACTIVIT | 44  | 0.367777   | 1.01982 | 0.406706 | 0.681582 | 1 | 3403 tags=48%, list=21%, signal=60% | -0.405419 | -1.26833  | 0.106918   | 0.365971  | 1     | 3010 tags=48%, list=19%, signal=59% |
| GSE339_CD4POS_VS_CD8POS_DC_IN    | 176 | 0.307217   | 1.01968 | 0.412195 | 0.681645 | 1 | 2654 tags=24%, list=17%, signal=29% | -0.360733 | -1.37299  | 0.00512024 | 0.306205  | 1     | 2650 tags=31%, list=17%, signal=37% |
| ENDOMEMBRANE_SYSTEM              | 196 | 0.304035   | 1.01961 | 0.414371 | 0.681441 | 1 | 3699 tags=32%, list=23%, signal=41% | 0.433193  | 1.32699   | 0.00121503 | 0.145699  | 1     | 3299 tags=39%, list=21%, signal=49% |
| GSE9006_1MONTH_VS_4MONTH_PO      | 166 | 0.305058   | 1.01926 | 0.402469 | 0.682207 | 1 | 3214 tags=21%, list=20%, signal=26% | 0.253493  | 0.848531  | 0.832274   | 0.910733  | 1     | 4054 tags=25%, list=25%, signal=34% |
| GSE17721_LPS_VS_PAM3CSK4_4H_BI   | 175 | 0.304777   | 1.0191  | 0.41769  | 0.682329 | 1 | 4221 tags=36%, list=26%, signal=48% | 0.320423  | 1.09083   | 0.265931   | 0.580899  | 1     | 1774 tags=18%, list=11%, signal=20% |
| GSE17721_CTRL_VS_POLYIC_4H_BMC   | 175 | 0.307064   | 1.019   | 0.404177 | 0.682232 | 1 | 2186 tags=20%, list=14%, signal=23% | 0.379065  | 1.2751    | 0.0479705  | 0.318533  | 1     | 2727 tags=26%, list=17%, signal=31% |
| RECEPTOR_MEDIATED_ENDOCYTOSIS    | 29  | 0.399896   | 1.01894 | 0.44     | 0.681998 | 1 | 1921 tags=21%, list=12%, signal=23% | 0.373932  | 0.967116  | 0.52093    | 0.774919  | 1     | 2959 tags=24%, list=18%, signal=30% |
| GSE17721_CTRL_VS_POLYIC_0.5H_BN  | 175 | 0.308247   | 1.01868 | 0.421053 | 0.682514 | 1 | 2055 tags=17%, list=13%, signal=19% | 0.360859  | 1.2116    | 0.080465   | 0.416347  | 1     | 2835 tags=23%, list=18%, signal=27% |
| GSE17721_CPG_VS_GARDIQUMOD_I     | 174 | 0.305706</ |         |          |          |   |                                     |           |           |            |           |       |                                     |

Supplementary Table 3. Gene enrichment statistics for HD and control monkeys.

|                                  |     |          |          |          |          |   |                                     |           |           |            |          |   |                                     |
|----------------------------------|-----|----------|----------|----------|----------|---|-------------------------------------|-----------|-----------|------------|----------|---|-------------------------------------|
| GSE7460_CTRL_VS_FOXP3_OVEREXP    | 172 | 0.305027 | 1.01495  | 0.44     | 0.688212 | 1 | 4223 tags=26%, list=26%, signal=35% | 0.363048  | 1.23352   | 0.0788486  | 0.379646 | 1 | 1758 tags=16%, list=11%, signal=18% |
| GSE36392_MAC_VS_NEUTROPHIL_IL2   | 176 | 0.306708 | 1.01478  | 0.44908  | 0.688367 | 1 | 2689 tags=20%, list=17%, signal=24% | 0.350308  | 1.18008   | 0.13697    | 0.450582 | 1 | 2578 tags=19%, list=16%, signal=22% |
| GSE36476_CTRL_VS_TSST_ACT_40H_I  | 168 | 0.306898 | 1.01473  | 0.426108 | 0.688095 | 1 | 2856 tags=21%, list=18%, signal=25% | -0.307556 | -1.17854  | 0.0613208  | 0.447422 | 1 | 1889 tags=26%, list=12%, signal=29% |
| GSE17721_CPG_VS_GARDIQUIMOD_1    | 184 | 0.307107 | 1.01458  | 0.433492 | 0.688163 | 1 | 3226 tags=30%, list=20%, signal=38% | 0.262346  | 0.820207  | 0.767917   | 0.87879  | 1 | 3188 tags=27%, list=20%, signal=33% |
| GSE22886_IGA_VS_IGM_MEMORY_B_I   | 170 | 0.306712 | 1.01437  | 0.446494 | 0.688481 | 1 | 3228 tags=25%, list=20%, signal=31% | -0.238735 | -0.922866 | 0.755319   | 0.812592 | 1 | 2365 tags=21%, list=15%, signal=24% |
| LIPASE_ACTIVITY                  | 48  | 0.358487 | 1.01429  | 0.437592 | 0.688338 | 1 | 1778 tags=15%, list=11%, signal=16% | 0.472483  | 1.34148   | 0.0844646  | 0.251283 | 1 | 1677 tags=19%, list=10%, signal=21% |
| GSE3982_DC_VS_NEUTROPHIL_DN      | 174 | 0.304271 | 1.01373  | 0.423174 | 0.68993  | 1 | 3202 tags=25%, list=20%, signal=31% | 0.341923  | 1.15115   | 0.147561   | 0.491603 | 1 | 3030 tags=28%, list=19%, signal=34% |
| NEGATIVE_REGULATION_OF_CELLUL    | 42  | 0.368334 | 1.01339  | 0.426883 | 0.690703 | 1 | 3103 tags=26%, list=19%, signal=32% | 0.508521  | 1.41164   | 0.0309119  | 0.178502 | 1 | 2711 tags=33%, list=17%, signal=40% |
| GSE3982_DC_VS_MAC_LPS_STIM_U     | 181 | 0.305264 | 1.01319  | 0.423313 | 0.690918 | 1 | 2744 tags=25%, list=17%, signal=30% | 0.311951  | 1.04927   | 0.340606   | 0.663272 | 1 | 3246 tags=31%, list=20%, signal=38% |
| GSE17721_PAM3CSK4_VS_CPG_16H_I   | 181 | 0.304048 | 1.01239  | 0.420538 | 0.693318 | 1 | 3085 tags=25%, list=19%, signal=30% | 0.355741  | 1.20305   | 0.0955882  | 0.426064 | 1 | 3813 tags=32%, list=24%, signal=42% |
| GSE20366_EX_VIVO_VS_DEC205_COI   | 175 | 0.303928 | 1.01223  | 0.438702 | 0.693419 | 1 | 2765 tags=23%, list=17%, signal=27% | 0.287146  | 0.965841  | 0.550505   | 0.77458  | 1 | 4252 tags=29%, list=26%, signal=38% |
| CYTOSOL                          | 185 | 0.300972 | 1.01211  | 0.417983 | 0.693381 | 1 | 3364 tags=27%, list=21%, signal=34% | 0.338554  | 1.15581   | 0.144638   | 0.486877 | 1 | 2481 tags=23%, list=15%, signal=27% |
| GSE17721_CTRL_VS_CPG_2H_BMDM     | 172 | 0.303069 | 1.01189  | 0.415553 | 0.693678 | 1 | 1946 tags=15%, list=12%, signal=17% | 0.250754  | 0.843165  | 0.84901    | 0.911676 | 1 | 4108 tags=27%, list=26%, signal=36% |
| PHOSPHORYLATION                  | 288 | 0.290334 | 1.01107  | 0.428891 | 0.696017 | 1 | 3458 tags=27%, list=22%, signal=34% | -0.282331 | -1.15193  | 0.0687023  | 0.466626 | 1 | 1971 tags=21%, list=12%, signal=24% |
| AXON_GUIDANCE                    | 21  | 0.421463 | 1.01101  | 0.432787 | 0.695797 | 1 | 3118 tags=19%, list=19%, signal=24% | 0.335402  | 0.817072  | 0.748815   | 0.940276 | 1 | 2190 tags=14%, list=14%, signal=17% |
| CARBOHYDRATE_METABOLIC_PROCE     | 168 | 0.307067 | 1.01092  | 0.436183 | 0.695659 | 1 | 2863 tags=22%, list=18%, signal=27% | 0.289196  | 0.97676   | 0.524715   | 0.763938 | 1 | 2775 tags=22%, list=17%, signal=26% |
| GSE29618_BCELL_VS_MONOCYTE_U     | 154 | 0.308367 | 1.01081  | 0.440832 | 0.695581 | 1 | 2169 tags=21%, list=14%, signal=24% | -0.297017 | -1.12398  | 0.130802   | 0.487177 | 1 | 1278 tags=22%, list=8%, signal=24%  |
| GSE17721_CTRL_VS_LPS_24H_BMDM    | 180 | 0.30236  | 1.01079  | 0.449761 | 0.695197 | 1 | 3943 tags=36%, list=25%, signal=47% | -0.312264 | -1.19854  | 0.0677966  | 0.429187 | 1 | 2789 tags=30%, list=17%, signal=36% |
| GSE17721_LPS_VS_PAM3CSK4_16H_I   | 177 | 0.302024 | 1.0106   | 0.431373 | 0.695451 | 1 | 3220 tags=27%, list=20%, signal=33% | 0.252216  | 0.85423   | 0.837469   | 0.905694 | 1 | 2302 tags=19%, list=14%, signal=22% |
| SMALL_PROTEIN_CONJUGATING_ENZ    | 47  | 0.352981 | 1.01019  | 0.447059 | 0.696411 | 1 | 3403 tags=45%, list=21%, signal=57% | -0.408883 | -1.30548  | 0.0525959  | 0.353428 | 1 | 3010 tags=47%, list=19%, signal=57% |
| GSE17721_CTRL_VS_LPS_24H_BMDM    | 184 | 0.301586 | 1.00982  | 0.443142 | 0.697269 | 1 | 3353 tags=30%, list=21%, signal=38% | 0.26763   | 0.909345  | 0.694957   | 0.838987 | 1 | 4432 tags=39%, list=28%, signal=53% |
| GSE360_CTRL_VS_T_GONDIH_DC_UP    | 176 | 0.304255 | 1.00965  | 0.438257 | 0.697379 | 1 | 3923 tags=35%, list=24%, signal=46% | -0.28548  | -1.09978  | 0.156566   | 0.522826 | 1 | 2764 tags=28%, list=17%, signal=34% |
| PHOSPHORYLATION                  | 43  | 0.368558 | 1.00953  | 0.442167 | 0.697339 | 1 | 1478 tags=19%, list=9%, signal=20%  | 0.398702  | 1.10494   | 0.292754   | 0.554878 | 1 | 1557 tags=23%, list=10%, signal=26% |
| GSE17721_PAM3CSK4_VS_GADIQUIV    | 180 | 0.30233  | 1.00927  | 0.445844 | 0.697804 | 1 | 1777 tags=18%, list=11%, signal=20% | -0.263125 | -1.02446  | 0.361257   | 0.621835 | 1 | 3372 tags=32%, list=21%, signal=40% |
| NEGATIVE_REGULATION_OF_PROTEI    | 44  | 0.363764 | 1.00871  | 0.426301 | 0.699351 | 1 | 3103 tags=25%, list=19%, signal=31% | 0.49992   | 1.40201   | 0.0361991  | 0.189858 | 1 | 2711 tags=33%, list=17%, signal=48% |
| GSE11924_TH1_VS_TH2_CD4_TCELL    | 177 | 0.303453 | 1.00792  | 0.456548 | 0.701677 | 1 | 3150 tags=25%, list=20%, signal=31% | 0.281182  | 0.950494  | 0.602203   | 0.786822 | 1 | 2808 tags=21%, list=17%, signal=25% |
| GSE8515_IL1_VS_IL6_4H_STIM_I     | 164 | 0.305052 | 1.00755  | 0.441948 | 0.702545 | 1 | 3796 tags=23%, list=24%, signal=29% | 0.257223  | 0.861012  | 0.803504   | 0.898532 | 1 | 4380 tags=25%, list=27%, signal=29% |
| SMALL_CONJUGATING_PROTEIN_LIG    | 45  | 0.361518 | 1.00751  | 0.448584 | 0.702256 | 1 | 3403 tags=47%, list=21%, signal=59% | -0.386466 | -1.2122   | 0.140187   | 0.411953 | 1 | 3010 tags=47%, list=19%, signal=57% |
| GSE17721_CTRL_VS_LPS_6H_BMDM     | 172 | 0.304732 | 1.00721  | 0.447561 | 0.702517 | 1 | 2187 tags=18%, list=14%, signal=21% | 0.338479  | 1.14043   | 0.165829   | 0.511891 | 1 | 3153 tags=26%, list=20%, signal=31% |
| PROTEIN_MODIFICATION_BY_SMALL    | 37  | 0.37556  | 1.00714  | 0.453102 | 0.702626 | 1 | 2502 tags=32%, list=16%, signal=38% | 0.305631  | 0.830616  | 0.756135   | 0.925051 | 1 | 2291 tags=22%, list=14%, signal=25% |
| ATPASE_ACTIVITY_COUPLED          | 83  | 0.331143 | 1.0071   | 0.434548 | 0.702322 | 1 | 3593 tags=30%, list=22%, signal=39% | 0.390221  | 1.20894   | 0.136111   | 0.418606 | 1 | 2829 tags=28%, list=18%, signal=33% |
| GSE17721_PAM3CSK4_VS_GADIQUIV    | 170 | 0.306087 | 1.00701  | 0.451028 | 0.701951 | 1 | 3481 tags=28%, list=22%, signal=36% | 0.302852  | 1.02147   | 0.405473   | 0.707812 | 1 | 2920 tags=25%, list=18%, signal=31% |
| GSE11864_CSF1_IFNG_VS_CSF1_PA    | 173 | 0.302773 | 1.00686  | 0.436225 | 0.702222 | 1 | 3028 tags=27%, list=19%, signal=32% | 0.324743  | 1.10155   | 0.233962   | 0.559261 | 1 | 3181 tags=36%, list=20%, signal=44% |
| GSE19825_NAIVE_VS_IL2RAHIGH_DM   | 174 | 0.302503 | 1.00667  | 0.443902 | 0.702355 | 1 | 3870 tags=33%, list=24%, signal=43% | 0.349863  | 1.1819    | 0.107905   | 0.448745 | 1 | 3089 tags=28%, list=19%, signal=34% |
| GSE27786_LSK_VS_LIN_NEG_CELL_U   | 177 | 0.302725 | 1.00633  | 0.440636 | 0.703139 | 1 | 2884 tags=25%, list=18%, signal=30% | 0.285323  | 0.964885  | 0.546894   | 0.77331  | 1 | 3478 tags=29%, list=22%, signal=36% |
| SECRETION                        | 163 | 0.303842 | 1.00612  | 0.436118 | 0.703422 | 1 | 3134 tags=24%, list=20%, signal=29% | 0.354364  | 1.18114   | 0.131646   | 0.448886 | 1 | 2481 tags=21%, list=15%, signal=24% |
| PROTEIN_AMINO_ACID_N_LINKED_G    | 28  | 0.397974 | 1.00598  | 0.45768  | 0.703458 | 1 | 3941 tags=46%, list=25%, signal=61% | 0.475638  | 1.21753   | 0.193012   | 0.408198 | 1 | 1535 tags=21%, list=10%, signal=24% |
| GSE3982_CTRL_VS_LPS_1H_NEUTRO    | 176 | 0.304792 | 1.00566  | 0.461071 | 0.70414  | 1 | 3535 tags=24%, list=22%, signal=31% | 0.288705  | 0.965701  | 0.556511   | 0.774574 | 1 | 3282 tags=22%, list=20%, signal=27% |
| GSE14000_UNSTIM_VS_4H_LPS_DC_I   | 166 | 0.305258 | 1.00527  | 0.465923 | 0.705069 | 1 | 3289 tags=29%, list=20%, signal=36% | 0.287134  | 0.953926  | 0.575188   | 0.782473 | 1 | 4291 tags=30%, list=27%, signal=49% |
| GSE17721_LPS_VS_PAM3CSK4_12H_I   | 180 | 0.302374 | 1.00476  | 0.455324 | 0.706426 | 1 | 3581 tags=31%, list=22%, signal=40% | 0.310186  | 1.04308   | 0.365501   | 0.677694 | 1 | 2985 tags=26%, list=19%, signal=32% |
| GSE14448_ANTI_VALPHA2_VS_VBETA1  | 184 | 0.298019 | 1.00454  | 0.436585 | 0.706767 | 1 | 3941 tags=29%, list=25%, signal=38% | 0.343657  | 1.16076   | 0.141615   | 0.481693 | 1 | 3726 tags=32%, list=23%, signal=41% |
| POTASSIUM_ION_TRANSPORT          | 52  | 0.353519 | 1.00448  | 0.439822 | 0.706554 | 1 | 3119 tags=17%, list=19%, signal=21% | 0.430913  | 1.23766   | 0.131075   | 0.37806  | 1 | 4125 tags=33%, list=26%, signal=31% |
| GSE3982_MEMORY_CD4_TCELL_VS_T    | 163 | 0.302633 | 1.00447  | 0.447596 | 0.706108 | 1 | 3568 tags=29%, list=22%, signal=37% | -0.370002 | -1.42014  | 0          | 0.299413 | 1 | 2475 tags=21%, list=15%, signal=37% |
| GSE360_L_MAJOR_VS_B_MALAYI_LO    | 174 | 0.305719 | 1.00433  | 0.45697  | 0.706157 | 1 | 3164 tags=25%, list=20%, signal=30% | 0.413181  | 1.38922   | 0.00870647 | 0.198967 | 1 | 2975 tags=32%, list=19%, signal=39% |
| CELL_CORTEX_PART                 | 20  | 0.419196 | 1.0041   | 0.459936 | 0.706513 | 1 | 2108 tags=25%, list=13%, signal=29% | -0.471085 | -1.20492  | 0.226316   | 0.424204 | 1 | 2309 tags=25%, list=14%, signal=29% |
| GSE18791_CTRL_VS_NEWCASTLE_VIR   | 143 | 0.307329 | 1.00384  | 0.476312 | 0.706972 | 1 | 1964 tags=17%, list=12%, signal=19% | 0.307047  | 1.0046    | 0.449367   | 0.737465 | 1 | 2955 tags=19%, list=18%, signal=23% |
| LEUKOCYTE_ACTIVATION             | 59  | 0.347216 | 1.00374  | 0.447297 | 0.706871 | 1 | 2522 tags=29%, list=16%, signal=34% | 0.419153  | 1.22335   | 0.145714   | 0.398766 | 1 | 2704 tags=32%, list=17%, signal=39% |
| GSE37416_OH_VS_12H_F_TULARENSI   | 175 | 0.302984 | 1.00373  | 0.467233 | 0.70644  | 1 | 3358 tags=29%, list=21%, signal=36% | 0.261418  | 0.873225  | 0.786765   | 0.890395 | 1 | 2561 tags=32%, list=16%, signal=38% |
| GSE26669_CTRL_VS_COSTIM_BLOCK    | 178 | 0.298222 | 1.00341  | 0.457755 | 0.707121 | 1 | 3828 tags=28%, list=24%, signal=36% | 0.398767  | 1.34531   | 0.0179718  | 0.247141 | 1 | 3380 tags=34%, list=21%, signal=43% |
| GSE37416_CTRL_VS_12H_F_TULARENSI | 169 | 0.302168 | 1.00332  | 0.450549 | 0.707392 | 1 | 2629 tags=26%, list=16%, signal=31% | 0.285676  | 0.95708   | 0.562963   | 0.777993 | 1 | 2561 tags=32%, list=16%, signal=36% |
| PHOSPHOTRANSFERASE_ACTIVITY_PI   | 16  | 0.444369 | 1.00298  | 0.453448 | 0.707709 | 1 | 2759 tags=31%, list=17%, signal=38% | 0.650151  | 1.49005   | 0.0416667  | 0.136681 | 1 | 1560 tags=25%, list=10%, signal=28% |
| GSE17721_LPS_VS_PAM3CSK4_1H_BI   | 182 | 0.299752 | 1.00235  | 0.453771 | 0.70943  | 1 | 2441 tags=21%, list=15%, signal=25% | 0.333124  | 1.12354   | 0.220844   | 0.533424 | 1 | 3901 tags=35%, list=24%, signal=45% |
| G_PROTEIN_SIGNALING_COUPLED_T    | 58  | 0.343527 | 1.00199  | 0.438472 | 0.710219 | 1 | 1807 tags=12%, list=11%, signal=14% | 0.325607  | 0.955865  | 0.540698   | 0.779529 | 1 | 3757 tags=21%, list=23%, signal=27% |
| GSE26669_CTRL_VS_COSTIM_BLOCK    | 185 | 0.299032 | 1.00192  | 0.458484 | 0.70999  | 1 | 3684 tags=28%, list=23%, signal=35% | 0.33865   | 1.15377   | 0.166463   | 0.488094 | 1 | 2715 tags=25%, list=17%, signal=30% |
| GSE12845_NAIVE_VS_DARKZONE_GC    | 174 | 0.299631 | 1.0015   | 0.467722 | 0.711065 | 1 | 3877 tags=36%, list=24%, signal=47% | 0.349044  | 1.17769   | 0.120406   | 0.452696 | 1 | 3080 tags=32%, list=19%, signal=39% |
| GSE3982_MAC_VS_TH2_DN            | 171 | 0.301948 | 1.00141  | 0.445963 | 0.710937 | 1 | 2875 tags=26%, list=18%, signal=31% | 0.418042  | 1.41784   | 0.00498132 | 0.173372 | 1 | 3751 tags=40%, list=23%, signal=52% |
| GSE24634_TEFF_VS_TCONV_DAY7_IN   | 171 | 0.302396 | 1.00118  | 0.458838 | 0.711322 | 1 | 4127 tags=41%, list=26%, signal=55% | 0.290489  | 0.979154  | 0.52799    | 0.763307 | 1 | 3544 tags=32%, list=22%, signal=40% |
| GSE17721_0_5H_VS_24H_CPG_BMDM    | 176 | 0.29981  | 1.00071  | 0.461125 | 0.712522 | 1 | 2565 tags=22%, list=16%, signal=26% | 0.344942  | 1.16126   | 0.156984   | 0.481806 | 1 | 3150 tags=32%, list=20%, signal=39% |
| GSE1460_INTRATHYMIC_T_PROGENITI  | 174 | 0.302094 | 1.00062  | 0.467244 | 0.712401 | 1 | 3379 tags=30%, list=21%, signal=37% | 0.291613  | 0.987576  | 0.476886   | 0.753009 | 1 | 3353 tags=29%, list=21%, signal=37% |
| GSE339_CD4POS_VS_CD4CD8DN_DC     | 181 | 0.302521 | 1.00017  | 0.471951 | 0.713496 | 1 | 3277 tags=27%, list=20%, signal=33% | 0.292095  | 0.990899  | 0.487624   | 0.749806 | 1 | 2599 tags=25%, list=16%, signal=30% |
| GSE1432_CTRL_VS_IFNG_1H_MICRO    | 172 | 0.302872 | 0.999667 | 0.456548 | 0.713753 | 1 | 3116 tags=23%, list=19%, signal=29% | -0.231858 | -0.875478 | 0.869792   | 0.909574 | 1 | 3836 tags=31%, list=24%, signal=41% |
| GSE15324_ELF4_KO_VS_WT_NAIVE_C   | 173 | 0.30293  | 0.999639 | 0.465854 | 0.714465 | 1 | 2428 tags=20%, list=15%, signal=23% | 0.363057  | 1.21427   | 0.0651629  | 0.4133   | 1 | 3181 tags=27%, list=20%, signal=33% |
| RESPONSE_TO_DRUG                 | 17  | 0.434379 | 0.99953  | 0.463373 | 0.714394 | 1 | 1715 tags=18%, list=11%, signal=20% | 0.520035  | 1.19492   | 0.204114   | 0.434163 | 1 | 3091 tags=35%, list=19%, signal=44% |
| GSE29618_BCELL_VS_PDC_UP         | 163 | 0.302494 | 0.999318 | 0.46675  | 0.714692 | 1 | 3001 tags=28%, list=19%, signal=34% | -0.306989 | -1.17779  | 0.0746269  | 0.443133 | 1 | 1185 tags=20%, list=7%, signal=21%  |
| GSE26928_NAIVE_VS_EFF_MEMORY_I   | 166 | 0.301387 |          |          |          |   |                                     |           |           |            |          |   |                                     |

Supplementary Table 3. Gene enrichment statistics for HD and control monkeys.

|                                                      |     |          |          |          |          |   |                                     |           |           |            |          |   |                                     |
|------------------------------------------------------|-----|----------|----------|----------|----------|---|-------------------------------------|-----------|-----------|------------|----------|---|-------------------------------------|
| GSE17721_POLYIC_VS_PAM3CSK4_0_1                      | 176 | 0.298289 | 0.995993 | 0.478803 | 0.718525 | 1 | 2556 tags=19%, list=16%, signal=22% | -0.249163 | -0.974272 | 0.572197   | 0.712412 | 1 | 3211 tags=32%, list=20%, signal=39% |
| GSE7460_CTRL_VS_FOXP3_OVEREXP                        | 181 | 0.298621 | 0.995934 | 0.463473 | 0.718278 | 1 | 2791 tags=23%, list=17%, signal=28% | 0.328345  | 1.11068   | 0.122608   | 0.549367 | 1 | 2999 tags=27%, list=19%, signal=32% |
| GSE3982_EOSINOPHIL_VS_MAC_UP                         | 163 | 0.302233 | 0.995676 | 0.471236 | 0.718726 | 1 | 3224 tags=30%, list=20%, signal=37% | 0.288121  | 0.958663  | 0.609632   | 0.778293 | 1 | 3067 tags=24%, list=19%, signal=29% |
| GSE2706_UNSTIM_VS_8H_R848_DC_                        | 160 | 0.302056 | 0.995393 | 0.476961 | 0.719235 | 1 | 3337 tags=31%, list=21%, signal=39% | 0.372765  | 1.25366   | 0.607602   | 0.354695 | 1 | 3017 tags=31%, list=19%, signal=37% |
| GSE17721_POLYIC_VS_CPG_12H_BMI                       | 179 | 0.299544 | 0.994847 | 0.467722 | 0.720677 | 1 | 3528 tags=30%, list=22%, signal=38% | 0.298669  | 1.0098    | 0.451295   | 0.727882 | 1 | 3480 tags=27%, list=22%, signal=35% |
| GSE27786_BCELL_VS_CD8_TCELL_DN                       | 176 | 0.298526 | 0.994674 | 0.488485 | 0.720804 | 1 | 3296 tags=24%, list=21%, signal=30% | -0.293947 | -1.1439   | 0.0857143  | 0.463543 | 1 | 2326 tags=25%, list=14%, signal=29% |
| GSE14769_UNSTIM_VS_80MIN_LPS_I                       | 179 | 0.296915 | 0.99449  | 0.462002 | 0.720972 | 1 | 2665 tags=25%, list=17%, signal=30% | 0.252037  | 0.856635  | 0.903707   | 0.350707 | 1 | 3268 tags=28%, list=20%, signal=35% |
| GSE32423_MEMORY_VS_NAIVE_CD8                         | 178 | 0.300881 | 0.99438  | 0.487775 | 0.7209   | 1 | 1621 tags=15%, list=10%, signal=16% | 0.275081  | 0.929952  | 0.653611   | 0.811755 | 1 | 2780 tags=20%, list=17%, signal=24% |
| MITOCHONDRION_ORGANIZATION_A                         | 43  | 0.360826 | 0.994249 | 0.471842 | 0.720874 | 1 | 2268 tags=21%, list=14%, signal=24% | 0.421119  | 1.18861   | 0.196697   | 0.440617 | 1 | 2079 tags=23%, list=13%, signal=27% |
| GSE36476_CTRL_VS_TSS1_ACT_16H_1                      | 170 | 0.301377 | 0.994414 | 0.507299 | 0.720851 | 1 | 3521 tags=34%, list=22%, signal=42% | -0.353226 | -1.35002  | 0.00966184 | 0.332629 | 1 | 1992 tags=32%, list=12%, signal=37% |
| GSE29618_PRE_VS_DAY7_FLU_VACCI                       | 174 | 0.294963 | 0.994084 | 0.465116 | 0.720496 | 1 | 3837 tags=33%, list=24%, signal=43% | 0.342502  | 1.15778   | 0.172624   | 0.483969 | 1 | 3472 tags=32%, list=22%, signal=41% |
| GSE15930_NAIVE_VS_24H_IN_VITRO                       | 176 | 0.302034 | 0.993437 | 0.483832 | 0.722341 | 1 | 3124 tags=22%, list=19%, signal=27% | -0.208647 | -0.807122 | 0.989691   | 0.988724 | 1 | 2800 tags=20%, list=17%, signal=25% |
| GSE26669_CTRL_VS_COSTIM_BLOCK_CALCIIUM_ION_TRANSPORT | 21  | 0.423785 | 0.993065 | 0.464448 | 0.722713 | 1 | 3539 tags=31%, list=22%, signal=39% | -0.255591 | -0.980865 | 0.526882   | 0.698145 | 1 | 2749 tags=28%, list=17%, signal=34% |
| GSE17721_CTRL_VS_CPG_4H_BMDM                         | 182 | 0.296893 | 0.992726 | 0.469438 | 0.723241 | 1 | 1743 tags=24%, list=11%, signal=27% | 0.328281  | 0.788826  | 0.784539   | 0.965343 | 1 | 2632 tags=24%, list=16%, signal=28% |
| GSE22886_NAIVE_BCELL_VS_BM_PLA                       | 171 | 0.298662 | 0.992299 | 0.497525 | 0.724505 | 1 | 2693 tags=20%, list=17%, signal=24% | 0.257886  | 0.869721  | 0.794588   | 0.892146 | 1 | 3498 tags=25%, list=22%, signal=31% |
| GSE3982_EOSINOPHIL_VS_MAC_DN                         | 187 | 0.298352 | 0.992102 | 0.493719 | 0.724743 | 1 | 4053 tags=40%, list=25%, signal=53% | 0.422277  | 1.41779   | 0.00618812 | 0.172548 | 1 | 2972 tags=32%, list=19%, signal=39% |
| GSE17721_LPS_VS_POLYIC_4H_BMDM                       | 178 | 0.298457 | 0.99165  | 0.473555 | 0.725844 | 1 | 3280 tags=29%, list=20%, signal=37% | 0.306621  | 1.02816   | 0.399574   | 0.700443 | 1 | 2731 tags=27%, list=17%, signal=34% |
| ACID_AMINO_ACID_LIGASE_ACTIVITY                      | 51  | 0.35402  | 0.991586 | 0.464789 | 0.725621 | 1 | 3705 tags=33%, list=23%, signal=43% | 0.239042  | 0.809195  | 0.905172   | 0.948089 | 1 | 3292 tags=28%, list=21%, signal=32% |
| GSE10325_CD4_TCELL_VS_BCELL_DN                       | 152 | 0.298134 | 0.991533 | 0.498789 | 0.725534 | 1 | 3403 tags=45%, list=21%, signal=57% | -0.396393 | -1.26617  | 0.0966667  | 0.369378 | 1 | 2786 tags=43%, list=17%, signal=52% |
| GSE1432_CTRL_VS_IFNG_6H_MICRO                        | 173 | 0.29647  | 0.991429 | 0.475091 | 0.725266 | 1 | 2754 tags=26%, list=17%, signal=31% | 0.351937  | 1.16107   | 0.162404   | 0.481189 | 1 | 2546 tags=30%, list=16%, signal=36% |
| SULFUR_COMPOUND_BIOSYNTHETIC                         | 16  | 0.448104 | 0.991252 | 0.481032 | 0.725408 | 1 | 3156 tags=27%, list=20%, signal=33% | -0.253839 | -0.985996 | 0.464789   | 0.684798 | 1 | 3450 tags=33%, list=21%, signal=42% |
| CELLULAR_LIPID_METABOLIC_PROCE                       | 231 | 0.292225 | 0.991211 | 0.497647 | 0.725097 | 1 | 2858 tags=25%, list=18%, signal=30% | 0.407032  | 0.945884  | 0.538462   | 0.792269 | 1 | 1850 tags=31%, list=17%, signal=35% |
| GSE16522_MEMORY_VS_NAIVE_ANT                         | 174 | 0.300244 | 0.991118 | 0.483832 | 0.724671 | 1 | 2348 tags=18%, list=15%, signal=20% | 0.367251  | 1.26658   | 0.0344418  | 0.333043 | 1 | 2682 tags=24%, list=12%, signal=28% |
| GSE360_L_MAJOR_VS_T_GONDIU_DC                        | 173 | 0.296105 | 0.991093 | 0.488286 | 0.724603 | 1 | 1531 tags=16%, list=10%, signal=18% | -0.246482 | -0.944645 | 0.641509   | 0.768256 | 1 | 3453 tags=33%, list=22%, signal=42% |
| UDP_GLYCOYLTRANSFERASE_ACTIVI                        | 42  | 0.35969  | 0.99059  | 0.479134 | 0.725858 | 1 | 1690 tags=14%, list=11%, signal=15% | 0.353676  | 1.17603   | 0.124378   | 0.452936 | 1 | 2862 tags=24%, list=18%, signal=29% |
| GSE15324_ELF4_KO_VS_WT_NAIVE_1                       | 169 | 0.298391 | 0.990549 | 0.506832 | 0.725554 | 1 | 537 tags=12%, list=3%, signal=12%   | 0.334559  | 0.937669  | 0.58589    | 0.802035 | 1 | 275 tags=7%, list=2%, signal=7%     |
| GSE17721_LPS_VS_GARDIQUIMOD_0                        | 173 | 0.300045 | 0.990345 | 0.490752 | 0.725491 | 1 | 1965 tags=14%, list=12%, signal=15% | 0.349413  | 1.18402   | 0.124384   | 0.445623 | 1 | 3346 tags=24%, list=21%, signal=30% |
| GSE16522_MEMORY_VS_NAIVE_CD8                         | 172 | 0.300353 | 0.990375 | 0.504926 | 0.725621 | 1 | 3488 tags=30%, list=22%, signal=38% | -0.328299 | -1.2639   | 0.015      | 0.369629 | 1 | 2835 tags=31%, list=18%, signal=37% |
| GSE39820_TGFBETA1_VS_TGFBETA3                        | 171 | 0.29993  | 0.989144 | 0.490244 | 0.729065 | 1 | 2847 tags=26%, list=18%, signal=31% | 0.264071  | 0.886739  | 0.742927   | 0.873182 | 1 | 2923 tags=26%, list=18%, signal=32% |
| REGULATION_OF_IMMUNE_SYSTEM_                         | 59  | 0.342376 | 0.988726 | 0.495049 | 0.730055 | 1 | 2662 tags=18%, list=17%, signal=21% | 0.283326  | 0.946112  | 0.603214   | 0.794006 | 1 | 3002 tags=22%, list=19%, signal=27% |
| GSE12845_NAIVE_VS_PRE_CD_TONSI                       | 172 | 0.294221 | 0.988683 | 0.5      | 0.729739 | 1 | 2522 tags=27%, list=16%, signal=32% | 0.413074  | 1.21928   | 0.134978   | 0.403456 | 1 | 2704 tags=31%, list=17%, signal=37% |
| GSE360_DC_VS_MAC_T_GONDIU_UP                         | 164 | 0.3008   | 0.988144 | 0.483791 | 0.731207 | 1 | 3354 tags=32%, list=21%, signal=40% | 0.302319  | 1.01114   | 0.430946   | 0.726748 | 1 | 3257 tags=31%, list=20%, signal=33% |
| GSE17721_POLYIC_VS_GARDIQUIMO                        | 180 | 0.298602 | 0.988082 | 0.498071 | 0.730968 | 1 | 3127 tags=24%, list=19%, signal=30% | 0.33482   | 1.11923   | 0.216853   | 0.537327 | 1 | 3911 tags=30%, list=24%, signal=39% |
| GSE32423_CTRL_VS_IL7_IL4_MEMOR                       | 179 | 0.296499 | 0.986991 | 0.507937 | 0.734416 | 1 | 2875 tags=27%, list=18%, signal=33% | -0.821848 | -0.821848 | 0.994318   | 0.979276 | 1 | 3624 tags=32%, list=23%, signal=40% |
| DNA_POLYMERASE_ACTIVITY                              | 16  | 0.440904 | 0.986462 | 0.484536 | 0.735491 | 1 | 1828 tags=16%, list=11%, signal=17% | 0.418831  | 1.419     | 0.00742574 | 0.172095 | 1 | 3654 tags=34%, list=23%, signal=44% |
| POSITIVE_REGULATION_OF_IMMUNE                        | 26  | 0.394383 | 0.986252 | 0.463108 | 0.735766 | 1 | 3149 tags=38%, list=20%, signal=47% | 0.565124  | 1.27823   | 0.144054   | 0.313578 | 1 | 2562 tags=50%, list=16%, signal=59% |
| GSE14350_TREG_VS_TEFF_DN                             | 172 | 0.298531 | 0.986019 | 0.483146 | 0.736089 | 1 | 2184 tags=31%, list=14%, signal=36% | 0.397788  | 1.00157   | 0.464401   | 0.741431 | 1 | 2216 tags=27%, list=14%, signal=31% |
| GSE3982_CTRL_VS_LPS_48H_DC_DN                        | 185 | 0.29145  | 0.98588  | 0.508597 | 0.736134 | 1 | 3646 tags=23%, list=23%, signal=30% | 0.377099  | 1.27869   | 0.0404908  | 0.314494 | 1 | 1540 tags=13%, list=10%, signal=18% |
| GSE17721_0.5H_VS_24H_GARDIQUIM                       | 178 | 0.294874 | 0.984484 | 0.50828  | 0.739273 | 1 | 2708 tags=24%, list=17%, signal=28% | 0.374832  | 1.26935   | 0.0358911  | 0.392952 | 1 | 2903 tags=31%, list=18%, signal=35% |
| GSE17721_0.5H_VS_8H_GARDIQUIM                        | 175 | 0.292943 | 0.984733 | 0.507407 | 0.739214 | 1 | 3485 tags=28%, list=22%, signal=35% | 0.353346  | 1.19423   | 0.0975     | 0.433975 | 1 | 2613 tags=28%, list=16%, signal=30% |
| GSE29618_LAIV_VS_TIV_FLU_VACCI                       | 162 | 0.298764 | 0.98468  | 0.526699 | 0.738956 | 1 | 3067 tags=25%, list=19%, signal=31% | 0.300582  | 1.01331   | 0.42875    | 0.725387 | 1 | 2769 tags=25%, list=17%, signal=33% |
| GSE360_HIGH_VS_LOW_DOSE_B_MA                         | 175 | 0.296284 | 0.983781 | 0.498786 | 0.741597 | 1 | 1810 tags=14%, list=11%, signal=16% | 0.438099  | 1.46507   | 0.00629733 | 0.147107 | 1 | 3471 tags=32%, list=22%, signal=41% |
| GSE9650_EXHAUSTED_VS_MEMORY_                         | 182 | 0.293829 | 0.983556 | 0.506053 | 0.741889 | 1 | 4112 tags=26%, list=26%, signal=34% | 0.301686  | 1.02333   | 0.398304   | 0.704093 | 1 | 2514 tags=18%, list=16%, signal=21% |
| STEROID_BIOSYNTHETIC_PROCESS                         | 22  | 0.402751 | 0.983465 | 0.479806 | 0.741733 | 1 | 2686 tags=22%, list=17%, signal=26% | 0.304429  | 1.02438   | 0.41       | 0.703531 | 1 | 2516 tags=25%, list=16%, signal=30% |
| GSE360_DC_VS_MAC_L_MAJOR_UP                          | 175 | 0.29325  | 0.983359 | 0.498212 | 0.741648 | 1 | 2906 tags=23%, list=18%, signal=28% | 0.396518  | 0.964322  | 0.513138   | 0.773655 | 1 | 1151 tags=14%, list=7%, signal=15%  |
| GSE11924_TH1_VS_TH17_CD4_TCELL                       | 182 | 0.293454 | 0.983157 | 0.505455 | 0.741865 | 1 | 2325 tags=17%, list=14%, signal=20% | -0.247129 | -0.946741 | 0.617143   | 0.766156 | 1 | 1644 tags=15%, list=10%, signal=16% |
| GSE9037_CTRL_VS_LPS_4H_STIM_BV                       | 176 | 0.296992 | 0.98283  | 0.518029 | 0.742574 | 1 | 2974 tags=25%, list=19%, signal=30% | 0.26836   | 0.909858  | 0.700489   | 0.838948 | 1 | 3853 tags=31%, list=24%, signal=40% |
| GSE32423_IL7_VS_IL7_IL4_MEMORY                       | 172 | 0.293479 | 0.982022 | 0.514852 | 0.744885 | 1 | 2691 tags=23%, list=17%, signal=28% | -0.325521 | -1.25939  | 0.0201005  | 0.367523 | 1 | 2958 tags=30%, list=18%, signal=37% |
| POSITIVE_REGULATION_OF_BINDING                       | 26  | 0.392239 | 0.981926 | 0.482704 | 0.744712 | 1 | 2994 tags=24%, list=19%, signal=30% | 0.380867  | 1.28276   | 0.407088   | 0.30812  | 1 | 2684 tags=29%, list=17%, signal=35% |
| TRANSMEMBRANE_RECEPTOR_PROTI                         | 74  | 0.327437 | 0.981293 | 0.490489 | 0.744277 | 1 | 2502 tags=27%, list=16%, signal=32% | 0.30631   | 0.76813   | 0.038915   | 0.973783 | 1 | 3560 tags=29%, list=22%, signal=39% |
| HUMORAL_IMMUNE_RESPONSE                              | 27  | 0.379874 | 0.981815 | 0.48773  | 0.744204 | 1 | 2951 tags=22%, list=18%, signal=26% | 0.283819  | 0.862011  | 0.7625     | 0.898429 | 1 | 4180 tags=31%, list=26%, signal=42% |
| GSE27786_LIN_NEG_VS_NEUTROPHIL                       | 169 | 0.296208 | 0.981811 | 0.515777 | 0.743776 | 1 | 3772 tags=41%, list=23%, signal=53% | 0.384636  | 0.976183  | 0.492754   | 0.763884 | 1 | 3587 tags=44%, list=22%, signal=57% |
| BIOSYNTHETIC_PROCESS                                 | 435 | 0.277259 | 0.981404 | 0.535752 | 0.744787 | 1 | 3385 tags=28%, list=21%, signal=36% | -0.322731 | -1.23606  | 0.0481928  | 0.387696 | 1 | 3910 tags=37%, list=24%, signal=48% |
| GSE15930_NAIVE_VS_72H_IN_VITRO                       | 177 | 0.295485 | 0.980726 | 0.5      | 0.746621 | 1 | 3479 tags=25%, list=22%, signal=31% | 0.258353  | 0.939166  | 0.675214   | 0.799881 | 1 | 3263 tags=25%, list=20%, signal=31% |
| NUCLEAR_IMPORT                                       | 44  | 0.359128 | 0.980481 | 0.506849 | 0.747013 | 1 | 3589 tags=28%, list=22%, signal=36% | 0.305884  | 1.02911   | 0.413233   | 0.700207 | 1 | 3938 tags=32%, list=25%, signal=41% |
| POSITIVE_REGULATION_OF_CELL_DIF                      | 24  | 0.398565 | 0.980436 | 0.493711 | 0.746717 | 1 | 3069 tags=30%, list=19%, signal=36% | 0.261177  | 0.72589   | 0.930409   | 0.990916 | 1 | 3737 tags=34%, list=23%, signal=44% |
| ATPASE_ACTIVITY                                      | 101 | 0.315242 | 0.980188 | 0.501292 | 0.747144 | 1 | 924 tags=13%, list=6%, signal=13%   | -0.476375 | -1.3038   | 0.131653   | 0.350642 | 1 | 3793 tags=21%, list=2%, signal=21%  |
| GSE17721_POLYIC_VS_CPG_8H_BMD                        | 180 | 0.295593 | 0.980093 | 0.531136 | 0.747005 | 1 | 2972 tags=25%, list=19%, signal=30% | 0.301752  | 0.960674  | 0.526035   | 0.775112 | 1 | 3091 tags=27%, list=19%, signal=33% |
| GSE17721_POLYIC_VS_GARDIQUIMO                        | 180 | 0.292852 | 0.979531 | 0.538272 | 0.748414 | 1 | 2595 tags=22%, list=16%, signal=26% | 0.308258  | 1.05245   | 0.325436   | 0.657531 |   |                                     |



Supplementary Table 3. Gene enrichment statistics for HD and control monkeys.

|                                 |     |          |          |          |          |   |                                     |           |           |           |          |   |                                     |
|---------------------------------|-----|----------|----------|----------|----------|---|-------------------------------------|-----------|-----------|-----------|----------|---|-------------------------------------|
| GSE17974_CTRL_VS_ACT_IL4_AND_A  | 183 | 0.287869 | 0.953536 | 0.586207 | 0.78901  | 1 | 3086 tags=27%, list=19%, signal=33% | 0.403481  | 1.35776   | 0.0156438 | 0.232572 | 1 | 3589 tags=39%, list=22%, signal=50% |
| GSE14769_UNSTIM_VS_120MIN_LPS   | 179 | 0.287006 | 0.953481 | 0.589109 | 0.78872  | 1 | 2970 tags=26%, list=19%, signal=31% | -0.260448 | -1.0147   | 0.39759   | 0.625604 | 1 | 2608 tags=28%, list=16%, signal=34% |
| PIGMENT_BIOSYNTHETIC_PROCESS    | 17  | 0.419702 | 0.953209 | 0.519169 | 0.789205 | 1 | 1018 tags=18%, list=6%, signal=19%  | -0.352776 | -0.867382 | 0.662234  | 0.918258 | 1 | 2916 tags=41%, list=18%, signal=50% |
| CASPASE_ACTIVATION              | 23  | 0.390472 | 0.952978 | 0.514331 | 0.789506 | 1 | 3289 tags=39%, list=20%, signal=49% | -0.338308 | -0.966134 | 0.62533   | 0.854325 | 1 | 2226 tags=22%, list=14%, signal=25% |
| TRANSFERASE_ACTIVITY_TRANSFERRI | 385 | 0.270257 | 0.952798 | 0.629464 | 0.789647 | 1 | 3421 tags=27%, list=21%, signal=34% | 0.243816  | 0.873951  | 0.847514  | 0.889974 | 1 | 3727 tags=30%, list=23%, signal=39% |
| GSE17721_0.5H_VS_12H_PAM3CSK4   | 175 | 0.288297 | 0.952145 | 0.574209 | 0.791334 | 1 | 2820 tags=26%, list=18%, signal=31% | -0.292165 | -1.13113  | 0.120603  | 0.476949 | 1 | 2892 tags=31%, list=18%, signal=37% |
| GSE7852_THYMUS_VS_FAT_TCONV_I   | 177 | 0.287349 | 0.951735 | 0.585956 | 0.792235 | 1 | 3925 tags=33%, list=24%, signal=44% | 0.636406  | 1.2338    | 0.0756824 | 0.380163 | 1 | 2880 tags=31%, list=18%, signal=37% |
| GSE17721_PAM3CSK4_VS_CPG_8H_B   | 179 | 0.283031 | 0.951635 | 0.58231  | 0.792047 | 1 | 3161 tags=23%, list=20%, signal=29% | 0.329459  | 1.12799   | 0.180268  | 0.530536 | 1 | 2330 tags=23%, list=15%, signal=27% |
| GSE22886_IGM_MEMORY_BCELL_VS_I  | 166 | 0.287066 | 0.951283 | 0.567961 | 0.792809 | 1 | 1694 tags=14%, list=11%, signal=15% | -0.375402 | -1.41665  | 0         | 0.289829 | 1 | 2550 tags=32%, list=16%, signal=38% |
| GSE18791_CTRL_VS_NEWCASTLE_VIR  | 172 | 0.288105 | 0.950936 | 0.581928 | 0.793482 | 1 | 1472 tags=17%, list=9%, signal=18%  | 0.318892  | 1.07208   | 0.302326  | 0.620262 | 1 | 3628 tags=39%, list=23%, signal=50% |
| GSE18791_CTRL_VS_NEWCASTLE_VIR  | 164 | 0.28817  | 0.950388 | 0.584767 | 0.793352 | 1 | 3351 tags=28%, list=21%, signal=35% | 0.244421  | 0.821494  | 0.893534  | 0.935541 | 1 | 3490 tags=24%, list=22%, signal=30% |
| GSE360_DC_VS_MAC_L_MAJOR_DN     | 170 | 0.284971 | 0.950327 | 0.594397 | 0.794571 | 1 | 2820 tags=22%, list=18%, signal=26% | 0.345459  | 1.15074   | 0.158282  | 0.491242 | 1 | 3433 tags=28%, list=21%, signal=35% |
| GSE17721_PAM3CSK4_VS_GADIQDQV   | 179 | 0.284164 | 0.95013  | 0.579531 | 0.794764 | 1 | 2412 tags=21%, list=15%, signal=24% | 0.316937  | 1.07426   | 0.285714  | 0.614604 | 1 | 3094 tags=29%, list=19%, signal=36% |
| G_PROTEIN_SIGNALING_COUPLED_TG  | 94  | 0.306445 | 0.950073 | 0.555703 | 0.7945   | 1 | 2889 tags=14%, list=18%, signal=17% | 0.281035  | 0.883452  | 0.728767  | 0.875904 | 1 | 4245 tags=21%, list=26%, signal=29% |
| SMALL_GTPASE_REGULATOR_ACTIVI   | 58  | 0.324016 | 0.950052 | 0.537901 | 0.794122 | 1 | 3383 tags=29%, list=21%, signal=37% | -0.292651 | -0.963852 | 0.493197  | 0.736781 | 1 | 3196 tags=36%, list=20%, signal=45% |
| GSE17974_CTRL_VS_ACT_IL4_AND_A  | 181 | 0.284449 | 0.950017 | 0.616125 | 0.793792 | 1 | 3360 tags=30%, list=21%, signal=37% | 0.352224  | 1.19623   | 0.0997506 | 0.432938 | 1 | 2484 tags=27%, list=15%, signal=34% |
| GSE14308_TH17_VS_NAIVE_CD4_TCE  | 167 | 0.289466 | 0.950014 | 0.596852 | 0.793354 | 1 | 2395 tags=20%, list=15%, signal=23% | 0.258675  | 0.866974  | 0.785714  | 0.894493 | 1 | 2867 tags=33%, list=18%, signal=27% |
| GSE17974_CTRL_VS_ACT_IL4_AND_A  | 180 | 0.286685 | 0.949469 | 0.597356 | 0.794652 | 1 | 3259 tags=28%, list=20%, signal=34% | 0.444119  | 1.50152   | 0         | 0.127921 | 1 | 2420 tags=23%, list=15%, signal=38% |
| GSE28237_EARLY_VS_LATE_GC_BCELL | 178 | 0.284441 | 0.949356 | 0.583135 | 0.794556 | 1 | 2706 tags=23%, list=17%, signal=27% | 0.350266  | 1.18153   | 0.112195  | 0.449445 | 1 | 2181 tags=20%, list=14%, signal=23% |
| GSE12845_IGD_POS_VS_NEG_BLOOD   | 168 | 0.287706 | 0.949086 | 0.597291 | 0.794978 | 1 | 3666 tags=32%, list=23%, signal=41% | 0.332505  | 1.11402   | 0.226296  | 0.545099 | 1 | 2931 tags=28%, list=18%, signal=34% |
| REGULATION_OF_RNA_METABOLIC_F   | 419 | 0.267825 | 0.948556 | 0.649563 | 0.796241 | 1 | 2667 tags=19%, list=17%, signal=23% | 0.234541  | 0.845162  | 0.929438  | 0.912782 | 1 | 1969 tags=13%, list=12%, signal=15% |
| GSE15324_NAIVE_VS_ACTIVATED_EU  | 166 | 0.285428 | 0.948318 | 0.605948 | 0.796553 | 1 | 4020 tags=30%, list=25%, signal=40% | 0.23131   | 0.799634  | 0.949878  | 0.968557 | 1 | 4093 tags=32%, list=25%, signal=42% |
| RECEPTOR_SIGNALING_PROTEIN_SER  | 31  | 0.364815 | 0.948039 | 0.51811  | 0.797029 | 1 | 1733 tags=23%, list=11%, signal=25% | -0.383894 | -1.09229  | 0.242775  | 0.532249 | 1 | 1664 tags=29%, list=10%, signal=32% |
| SEQUENCE_SPECIFIC_DNA_BINDING   | 49  | 0.334528 | 0.947873 | 0.567989 | 0.797138 | 1 | 3716 tags=27%, list=23%, signal=34% | -0.449579 | -1.42335  | 0.030303  | 0.298636 | 1 | 3710 tags=39%, list=23%, signal=50% |
| GSE26928_EFF_MEMORY_VS_CXCR5    | 160 | 0.280472 | 0.947667 | 0.580566 | 0.797366 | 1 | 2984 tags=25%, list=19%, signal=30% | -0.349458 | -1.31789  | 0.0196708 | 0.340971 | 1 | 2518 tags=28%, list=16%, signal=34% |
| GSE17721_0.5H_VS_8H_LPS_BMDM    | 173 | 0.283716 | 0.947415 | 0.599256 | 0.797729 | 1 | 3419 tags=28%, list=21%, signal=36% | 0.317806  | 1.06444   | 0.315657  | 0.635075 | 1 | 1871 tags=20%, list=12%, signal=22% |
| N_ACETYLTTRANSFERASE_ACTIVITY   | 19  | 0.406268 | 0.947384 | 0.545902 | 0.797375 | 1 | 3654 tags=42%, list=23%, signal=54% | 0.268251  | 0.6441    | 0.940476  | 0.997526 | 1 | 2629 tags=21%, list=16%, signal=25% |
| GSE3337_CTRL_VS_4H_IFNG_IN_CD8  | 175 | 0.282852 | 0.946892 | 0.609816 | 0.798479 | 1 | 3945 tags=34%, list=25%, signal=44% | 0.301057  | 1.00993   | 0.447103  | 0.727925 | 1 | 2623 tags=23%, list=16%, signal=27% |
| TRANSITION_METAL_ION_BINDING    | 93  | 0.306498 | 0.946655 | 0.573003 | 0.799051 | 1 | 2428 tags=17%, list=15%, signal=20% | 0.252231  | 0.786153  | 0.898402  | 0.966649 | 1 | 2047 tags=15%, list=13%, signal=17% |
| RNA_CATABOLIC_PROCESS           | 22  | 0.393257 | 0.94624  | 0.556604 | 0.799618 | 1 | 2997 tags=32%, list=19%, signal=39% | 0.364017  | 0.887107  | 0.642623  | 0.872645 | 1 | 2163 tags=32%, list=13%, signal=37% |
| GSE11864_UNTREATED_VS_CSF1_PA   | 162 | 0.288805 | 0.945762 | 0.591304 | 0.800692 | 1 | 3868 tags=38%, list=24%, signal=49% | 0.318984  | 1.06118   | 0.340399  | 0.642401 | 1 | 3060 tags=32%, list=19%, signal=39% |
| DNA_DAMAGE_CHECKPOINT           | 18  | 0.404792 | 0.945759 | 0.533981 | 0.800253 | 1 | 3979 tags=50%, list=25%, signal=66% | -0.293537 | -0.742579 | 0.096638  | 0.996638 | 1 | 4001 tags=44%, list=25%, signal=59% |
| MEMBRANE_LIPID_METABOLIC_PRO    | 91  | 0.31046  | 0.945567 | 0.564276 | 0.800425 | 1 | 1517 tags=15%, list=9%, signal=17%  | 0.406822  | 1.26829   | 0.0825309 | 0.330119 | 1 | 2959 tags=30%, list=18%, signal=36% |
| NUCLEOBASENUCLEOSIDE_AND_NUC    | 49  | 0.33808  | 0.945486 | 0.557276 | 0.800258 | 1 | 3584 tags=39%, list=22%, signal=50% | -0.24637  | -0.780363 | 0.924528  | 0.994418 | 1 | 3084 tags=27%, list=19%, signal=33% |
| SODIUM_ION_TRANSPORT            | 19  | 0.401332 | 0.945524 | 0.532368 | 0.800552 | 1 | 3068 tags=26%, list=19%, signal=32% | 0.397808  | 0.9516    | 0.535433  | 0.785644 | 1 | 1737 tags=11%, list=11%, signal=12% |
| GSE360_CTRL_VS_B_MALAYI_LOW_D   | 170 | 0.287107 | 0.94518  | 0.600249 | 0.80034  | 1 | 3693 tags=31%, list=23%, signal=40% | 0.301333  | 1.012     | 0.418342  | 0.726957 | 1 | 2600 tags=21%, list=16%, signal=24% |
| BRAIN_DEVELOPMENT               | 47  | 0.3383   | 0.945178 | 0.534286 | 0.799896 | 1 | 780 tags=11%, list=5%, signal=11%   | -0.323095 | -0.997048 | 0.427711  | 0.660276 | 1 | 2306 tags=19%, list=14%, signal=22% |
| GSE17721_LPS_VS_POLYIC_2H_BMDP  | 180 | 0.283824 | 0.945151 | 0.58802  | 0.79954  | 1 | 3881 tags=32%, list=24%, signal=42% | 0.255353  | 0.869991  | 0.79602   | 0.892407 | 1 | 1536 tags=14%, list=10%, signal=16% |
| EXCITATORY_EXTRACELLULAR_LIGAN  | 20  | 0.400975 | 0.945092 | 0.531981 | 0.799287 | 1 | 4049 tags=20%, list=25%, signal=27% | 0.316023  | 0.753538  | 0.84065   | 0.981789 | 1 | 181 tags=5%, list=1%, signal=5%     |
| GSE10239_NAIVE_VS_MEMORY_CD8    | 170 | 0.285122 | 0.945083 | 0.595152 | 0.79887  | 1 | 3132 tags=22%, list=20%, signal=27% | -0.297758 | -1.13445  | 0.13198   | 0.470404 | 1 | 1537 tags=18%, list=10%, signal=19% |
| GSE32423_CTRL_VS_IL7_MEMORY_CI  | 172 | 0.285442 | 0.944989 | 0.611043 | 0.798729 | 1 | 2146 tags=15%, list=13%, signal=17% | 0.385715  | 1.29393   | 0.0342205 | 0.296875 | 1 | 3307 tags=27%, list=21%, signal=34% |
| GSE17721_PAM3CSK4_VS_GADIQDQV   | 175 | 0.28382  | 0.944865 | 0.598549 | 0.798682 | 1 | 3723 tags=28%, list=23%, signal=36% | 0.322498  | 1.08021   | 0.298489  | 0.6026   | 1 | 3848 tags=28%, list=24%, signal=36% |
| GSE9988_ANTITRICKI_VS_ANTI_TRE  | 176 | 0.284744 | 0.944726 | 0.573604 | 0.79867  | 1 | 2696 tags=24%, list=17%, signal=29% | 0.278501  | 0.934834  | 0.627376  | 0.805778 | 1 | 3523 tags=31%, list=22%, signal=39% |
| GSE6566_STRONG_VS_WEAK_DC_STI   | 147 | 0.289872 | 0.944709 | 0.597436 | 0.798278 | 1 | 3222 tags=24%, list=20%, signal=30% | 0.365937  | 1.22023   | 0.0949285 | 0.405349 | 1 | 3259 tags=26%, list=20%, signal=32% |
| GSE360_L_DONOVANI_VS_T_GONDI    | 173 | 0.283719 | 0.944662 | 0.610913 | 0.797977 | 1 | 2693 tags=20%, list=17%, signal=24% | 0.368518  | 1.25243   | 0.0598504 | 0.356355 | 1 | 2860 tags=18%, list=18%, signal=22% |
| GSE6269_FLU_VS_STREP_PNEUMO_II  | 147 | 0.289587 | 0.944647 | 0.585213 | 0.79758  | 1 | 2045 tags=15%, list=13%, signal=17% | -0.274876 | -1.03132  | 0.355556  | 0.609843 | 1 | 2179 tags=18%, list=14%, signal=20% |
| GSE13229_MATURE_VS_INTMATURE    | 173 | 0.283553 | 0.944612 | 0.623921 | 0.797238 | 1 | 2830 tags=19%, list=18%, signal=23% | 0.353234  | 1.17661   | 0.130273  | 0.454722 | 1 | 3573 tags=28%, list=22%, signal=35% |
| GSE22886_DAY0_VS_DAY1_MONOCY    | 178 | 0.283044 | 0.944357 | 0.599512 | 0.797588 | 1 | 3263 tags=30%, list=20%, signal=37% | -0.344036 | -1.33965  | 0         | 0.344043 | 1 | 2721 tags=37%, list=17%, signal=43% |
| PROTEIN_N_TERMINUS_BINDING      | 38  | 0.350667 | 0.944277 | 0.54491  | 0.797393 | 1 | 2697 tags=24%, list=17%, signal=28% | 0.381137  | 1.04811   | 0.370597  | 0.666483 | 1 | 3396 tags=37%, list=21%, signal=47% |
| GSE17721_POLYIC_VS_PAM3CSK4_4H  | 177 | 0.285084 | 0.944189 | 0.601212 | 0.797211 | 1 | 4009 tags=35%, list=25%, signal=46% | 0.254871  | 0.858691  | 0.720877  | 0.900945 | 1 | 3175 tags=25%, list=20%, signal=31% |
| GOLGI_APPARATUS_PART            | 90  | 0.304225 | 0.943744 | 0.561737 | 0.798168 | 1 | 3726 tags=33%, list=23%, signal=43% | 0.443753  | 1.38697   | 0.0307263 | 0.199911 | 1 | 3371 tags=43%, list=21%, signal=55% |
| GSE17721_CTRL_VS_POLYIC_12H_BV  | 185 | 0.280167 | 0.943579 | 0.600237 | 0.798259 | 1 | 3264 tags=23%, list=20%, signal=29% | 0.360059  | 1.22813   | 0.0763547 | 0.387491 | 1 | 2086 tags=23%, list=13%, signal=26% |
| GSE339_CD4POS_VS_CD4CD8DN_DC    | 174 | 0.283698 | 0.943028 | 0.626076 | 0.799462 | 1 | 3219 tags=25%, list=20%, signal=31% | 0.370239  | 1.25691   | 0.0654321 | 0.348371 | 1 | 3028 tags=32%, list=19%, signal=39% |
| CYSTEINE_TYPE_ENDOPEPTIDASE_AC  | 36  | 0.34794  | 0.94241  | 0.56     | 0.800913 | 1 | 1902 tags=22%, list=12%, signal=25% | 0.334133  | 0.91111   | 0.615499  | 0.840031 | 1 | 3795 tags=39%, list=24%, signal=51% |
| GSE15750_WT_VS_TRAF6KO_DAY6_E   | 174 | 0.284246 | 0.942366 | 0.610771 | 0.800615 | 1 | 3125 tags=25%, list=19%, signal=30% | 0.305697  | 1.03357   | 0.395232  | 0.691769 | 1 | 2323 tags=19%, list=14%, signal=22% |
| GSE3982_EOSINOPHIL_VS_MAST_CEL  | 179 | 0.281882 | 0.942078 | 0.60274  | 0.800172 | 1 | 3251 tags=26%, list=20%, signal=32% | 0.320185  | 1.08629   | 0.27451   | 0.593536 | 1 | 3614 tags=34%, list=23%, signal=43% |
| GSE17721_PAM3CSK4_VS_CPG_6H_B   | 173 | 0.287136 | 0.942048 | 0.614057 | 0.800715 | 1 | 2906 tags=25%, list=18%, signal=31% | 0.364412  | 1.22378   | 0.075764  | 0.398739 | 1 | 4049 tags=42%, list=25%, signal=56% |
| GSE360_CTRL_VS_B_MALAYI_HIGH_C  | 179 | 0.284078 | 0.941623 | 0.585784 | 0.801634 | 1 | 4076 tags=31%, list=25%, signal=41% | 0.338417  | 1.148     | 0.159174  | 0.493957 | 1 | 2737 tags=22%, list=17%, signal=26% |
| GSE24142_EARLY_THYMIC_PROGENIT  | 176 | 0.283704 | 0.941532 | 0.586716 | 0.801491 | 1 | 3290 tags=27%, list=20%, signal=34% | 0.30565   | 1.03482   | 0.397571  | 0.690915 | 1 | 2944 tags=25%, list=18%, signal=30% |
| KINASE_ACTIVITY                 | 334 | 0.26936  | 0.9413   |          |          |   |                                     |           |           |           |          |   |                                     |

Supplementary Table 3. Gene enrichment statistics for HD and control monkeys.

|                                   |     |          |          |          |          |   |                                     |           |           |            |           |                                     |                                     |
|-----------------------------------|-----|----------|----------|----------|----------|---|-------------------------------------|-----------|-----------|------------|-----------|-------------------------------------|-------------------------------------|
| GSE22886_NAIVE_TCELL_VS_NKCELL    | 175 | 0.278678 | 0.934613 | 0.642336 | 0.813497 | 1 | 2870 tags=23%, list=18%, signal=28% | -0.24963  | -0.948122 | 0.668367   | 0.765606  | 1                                   | 2745 tags=29%, list=17%, signal=34% |
| GSE17721_CTRL_VS_CPG_12H_BMDM     | 172 | 0.281801 | 0.934113 | 0.628049 | 0.814585 | 1 | 3103 tags=30%, list=19%, signal=36% | -0.271163 | -1.04488  | 0.255682   | 0.591325  | 1                                   | 2957 tags=31%, list=18%, signal=38% |
| GSE9988_LPS_VS_LOW_LPS_MONOC      | 128 | 0.295311 | 0.933617 | 0.610969 | 0.81574  | 1 | 3104 tags=20%, list=19%, signal=24% | 0.285529  | 0.938305  | 0.598958   | 0.801661  | 1                                   | 2611 tags=15%, list=16%, signal=18% |
| GSE11924_TFH_VS_TH1_CD4_TCELL     | 173 | 0.282638 | 0.933481 | 0.63848  | 0.815685 | 1 | 4142 tags=38%, list=26%, signal=5%  | 0.240094  | 0.812508  | 0.92394    | 0.94447   | 1                                   | 3829 tags=29%, list=24%, signal=38% |
| GSE26928_NAIVE_VS_CENT_MEMOR      | 156 | 0.282754 | 0.933146 | 0.636699 | 0.816316 | 1 | 3858 tags=35%, list=24%, signal=46% | -0.267334 | -1.01784  | 0.425      | 0.623214  | 1                                   | 2010 tags=22%, list=13%, signal=25% |
| TRANSCRIPTION_ACTIVATOR_ACTIVIT   | 160 | 0.282655 | 0.932811 | 0.642946 | 0.816914 | 1 | 2591 tags=18%, list=16%, signal=21% | -0.339528 | -1.31704  | 0.0162162  | 0.335783  | 1                                   | 3120 tags=29%, list=19%, signal=36% |
| G_PROTEIN_SIGNALING_COUPLED_T     | 43  | 0.337034 | 0.932128 | 0.575342 | 0.818543 | 1 | 2638 tags=19%, list=16%, signal=22% | 0.337638  | 0.945948  | 0.56124    | 0.792555  | 1                                   | 1521 tags=14%, list=9%, signal=15%  |
| NUCLEAR_TRANSPORT                 | 78  | 0.3057   | 0.932087 | 0.610512 | 0.818233 | 1 | 3499 tags=32%, list=22%, signal=41% | -0.277957 | -0.95079  | 0.553114   | 0.766848  | 1                                   | 2942 tags=31%, list=18%, signal=37% |
| GSE360_CTRL_VS_L_MAJOR_DC_UP      | 173 | 0.281105 | 0.931885 | 0.653894 | 0.818558 | 1 | 3608 tags=32%, list=22%, signal=41% | 0.382978  | 1.28146   | 0.0415617  | 0.310221  | 1                                   | 3381 tags=34%, list=21%, signal=43% |
| GSE27786_NKCELL_VS_NEUTROPHIL     | 164 | 0.282078 | 0.931605 | 0.631188 | 0.818885 | 1 | 2809 tags=21%, list=17%, signal=25% | 0.272452  | 0.92293   | 0.666667   | 0.824426  | 1                                   | 3688 tags=26%, list=23%, signal=33% |
| GSE17721_CTRL_VS_GADQIQUIMOD      | 169 | 0.282326 | 0.931231 | 0.651332 | 0.819582 | 1 | 3199 tags=24%, list=20%, signal=30% | 0.331263  | 1.11175   | 0.282288   | 0.548328  | 1                                   | 3286 tags=28%, list=20%, signal=35% |
| GSE29618_PRE_VS_DAV7_POST_LAIV    | 164 | 0.281497 | 0.93113  | 0.6275   | 0.819448 | 1 | 3217 tags=18%, list=20%, signal=22% | -0.246081 | -0.931368 | 0.678392   | 0.79974   | 1                                   | 3196 tags=17%, list=20%, signal=21% |
| GSE29614_CTRL_VS_TIV_FLU_VACCIN   | 133 | 0.28869  | 0.930962 | 0.632242 | 0.819502 | 1 | 4957 tags=23%, list=31%, signal=33% | -0.248715 | -0.92215  | 0.701923   | 0.814014  | 1                                   | 4370 tags=24%, list=27%, signal=33% |
| GSE13484_UNSTIM_VS_12H_YF17D_1    | 172 | 0.280238 | 0.930953 | 0.635151 | 0.819081 | 1 | 3064 tags=25%, list=19%, signal=31% | 0.292188  | 0.986961  | 0.490247   | 0.751619  | 1                                   | 2544 tags=24%, list=16%, signal=28% |
| GSE339_CD4POS_VS_CD8POS_DC_IN     | 179 | 0.279156 | 0.930528 | 0.647837 | 0.819966 | 1 | 3056 tags=22%, list=19%, signal=27% | 0.311732  | 1.05557   | 0.31746    | 0.654159  | 1                                   | 3273 tags=24%, list=20%, signal=30% |
| GSE113306_RA_VS_UNTREATED_TCON    | 169 | 0.282398 | 0.930383 | 0.640741 | 0.819973 | 1 | 1904 tags=15%, list=12%, signal=17% | 0.232024  | 0.782787  | 0.956843   | 0.968843  | 1                                   | 4490 tags=33%, list=28%, signal=46% |
| NEGATIVE_REGULATION_OF_CELULU     | 234 | 0.272816 | 0.929969 | 0.666667 | 0.820845 | 1 | 3103 tags=23%, list=19%, signal=28% | 0.334701  | 1.15898   | 0.12426    | 0.483349  | 1                                   | 2711 tags=24%, list=17%, signal=28% |
| GSE14308_TH1_VS_NATURAL_TREG      | 176 | 0.279518 | 0.929934 | 0.645122 | 0.820513 | 1 | 1463 tags=14%, list=9%, signal=15%  | 0.358333  | 1.20219   | 0.0923261  | 0.427687  | 1                                   | 2933 tags=27%, list=18%, signal=33% |
| GSE3982_CTRL_VS_LPS_1H_NEUTROF    | 168 | 0.279735 | 0.929472 | 0.640898 | 0.821513 | 1 | 3863 tags=29%, list=24%, signal=37% | -0.279779 | -1.06589  | 0.235849   | 0.554397  | 1                                   | 2101 tags=21%, list=13%, signal=24% |
| GSE29614_CTRL_VS_DAV7_TIV_FLU_1   | 129 | 0.288133 | 0.929179 | 0.636135 | 0.821952 | 1 | 2803 tags=14%, list=17%, signal=17% | 0.229158  | 0.748494  | 0.979275   | 0.982951  | 1                                   | 3761 tags=18%, list=23%, signal=23% |
| CYCLIC_NUCLEOTIDE_MEDIATED_SIGI   | 96  | 0.297062 | 0.929112 | 0.624506 | 0.821721 | 1 | 2889 tags=14%, list=18%, signal=16% | 0.249617  | 0.781113  | 0.897616   | 0.969057  | 1                                   | 3276 tags=16%, list=20%, signal=20% |
| GSE19825_CD24LOW_VS_IL2RA_HIGF    | 169 | 0.279616 | 0.929093 | 0.642512 | 0.821343 | 1 | 3896 tags=37%, list=24%, signal=48% | 0.256324  | 0.867458  | 0.80402    | 0.893764  | 1                                   | 3608 tags=34%, list=22%, signal=44% |
| GSE2197_CPG_DNA_VS_UNTREATED_     | 177 | 0.278181 | 0.928858 | 0.660562 | 0.821627 | 1 | 3914 tags=29%, list=24%, signal=38% | 0.286427  | 0.969568  | 0.956818   | 0.773258  | 1                                   | 3351 tags=28%, list=21%, signal=35% |
| GSE9650_NAIVE_VS_EFF_CD8_TCELL    | 179 | 0.279293 | 0.928792 | 0.649272 | 0.821378 | 1 | 3124 tags=27%, list=19%, signal=33% | 0.276657  | 0.94577   | 0.608426   | 0.791649  | 1                                   | 2337 tags=23%, list=15%, signal=27% |
| GSE17974_1H_VS_72H_UNTREATED_     | 173 | 0.279537 | 0.928518 | 0.666667 | 0.821804 | 1 | 2272 tags=19%, list=14%, signal=22% | 0.445447  | 1.50481   | 0.00124069 | 0.127121  | 1                                   | 2929 tags=36%, list=18%, signal=43% |
| GSE6269_E_COLI_VS_STREP_AUREUS    | 136 | 0.286014 | 0.928391 | 0.611183 | 0.821746 | 1 | 2714 tags=25%, list=17%, signal=30% | -0.359438 | -1.3371   | 0.0176211  | 0.34239   | 1                                   | 1645 tags=26%, list=10%, signal=28% |
| GSE3982_BASOPHIL_VS_CENT_MEMC     | 176 | 0.278238 | 0.928142 | 0.645241 | 0.822083 | 1 | 3461 tags=28%, list=22%, signal=35% | 0.302617  | 1.01176   | 0.451493   | 0.726144  | 1                                   | 3301 tags=26%, list=20%, signal=32% |
| ENZYMELINKED_RECEPTOR_PROTEI      | 122 | 0.291615 | 0.927874 | 0.621656 | 0.822463 | 1 | 3203 tags=20%, list=20%, signal=25% | -0.313331 | -1.14424  | 0.137441   | 0.46421   | 1                                   | 1812 tags=19%, list=11%, signal=21% |
| GSE11057_PBMCC_VS_MEM_CD4_TCE     | 166 | 0.279963 | 0.927792 | 0.636142 | 0.822227 | 1 | 3809 tags=34%, list=24%, signal=45% | -0.293295 | -1.12727  | 0.1121827  | 0.483704  | 1                                   | 2018 tags=27%, list=13%, signal=30% |
| NEGATIVE_REGULATION_OF_METABO     | 236 | 0.272192 | 0.927076 | 0.6702   | 0.824009 | 1 | 3103 tags=23%, list=19%, signal=28% | 0.333678  | 1.14864   | 0.154118   | 0.493332  | 1                                   | 2711 tags=24%, list=17%, signal=28% |
| REGULATION_OF_JNK_ACTIVITY        | 20  | 0.392011 | 0.926855 | 0.55312  | 0.824266 | 1 | 1456 tags=20%, list=9%, signal=22%  | -0.391953 | -1.01838  | 0.40796    | 0.625005  | 1                                   | 3046 tags=50%, list=19%, signal=62% |
| T_CELL_PROLIFERATION              | 17  | 0.403787 | 0.92672  | 0.566558 | 0.824243 | 1 | 561 tags=18%, list=3%, signal=18%   | 0.496532  | 1.13546   | 0.80587    | 0.516688  | 1                                   | 4665 tags=53%, list=29%, signal=75% |
| GSE14308_TH2_VS_NAIVE_CD4_TCEL    | 174 | 0.277555 | 0.926641 | 0.627757 | 0.824031 | 1 | 4069 tags=35%, list=25%, signal=46% | 0.287011  | 0.964032  | 0.556946   | 0.774803  | 1                                   | 2474 tags=20%, list=15%, signal=24% |
| POSITIVE_REGULATION_OF_CASPASE    | 27  | 0.364211 | 0.926571 | 0.581144 | 0.823795 | 1 | 3289 tags=37%, list=20%, signal=47% | 0.283604  | 0.928564  | 0.909051   | 1         | 1973 tags=15%, list=12%, signal=17% |                                     |
| GSE12845_IJD_POS_BLOOD_VS_DAR     | 172 | 0.279379 | 0.925669 | 0.657178 | 0.826114 | 1 | 3555 tags=30%, list=22%, signal=38% | 0.308407  | 1.03115   | 0.387833   | 0.697035  | 1                                   | 3818 tags=34%, list=24%, signal=44% |
| GSE15215_CD2_POS_72H_VS_NEG_PDC_D | 181 | 0.279746 | 0.925546 | 0.682095 | 0.826041 | 1 | 2531 tags=25%, list=16%, signal=29% | 0.313333  | 1.05652   | 0.316626   | 0.651594  | 1                                   | 3510 tags=36%, list=22%, signal=46% |
| GSE360_L_DONOVANI_VS_B_MALAYI     | 180 | 0.277517 | 0.924842 | 0.652065 | 0.827721 | 1 | 3297 tags=27%, list=21%, signal=34% | 0.465307  | 1.57771   | 0          | 0.0831684 | 0.997                               | 3108 tags=37%, list=19%, signal=46% |
| GSE339_CD4POS_VS_CD8POS_DC_UF     | 178 | 0.278883 | 0.924384 | 0.660123 | 0.828604 | 1 | 3643 tags=30%, list=23%, signal=39% | 0.248897  | 0.844385  | 0.85912    | 0.913197  | 1                                   | 2346 tags=20%, list=15%, signal=23% |
| GSE10325_MYELOID_VS_LUPUS_MYE     | 166 | 0.279779 | 0.924214 | 0.657035 | 0.828669 | 1 | 1343 tags=9%, list=8%, signal=10%   | 0.419618  | 1.42013   | 0.0051509  | 0.170962  | 1                                   | 2767 tags=19%, list=8%, signal=23%  |
| GSE17974_1.5H_VS_72H_IL4_AND_A    | 177 | 0.279941 | 0.924182 | 0.671037 | 0.828324 | 1 | 3647 tags=32%, list=23%, signal=40% | 0.402241  | 1.33974   | 0.02457    | 0.251801  | 1                                   | 3097 tags=30%, list=19%, signal=37% |
| GSE16522_MEMORY_VS_NAIVE_ANT      | 177 | 0.277692 | 0.923547 | 0.652491 | 0.829769 | 1 | 3420 tags=28%, list=21%, signal=36% | 0.393594  | 1.32211   | 0.0212235  | 0.268592  | 1                                   | 2129 tags=25%, list=13%, signal=29% |
| GSE9006_HEALTHY_VS_TYPE_1_DIAB    | 173 | 0.278209 | 0.923363 | 0.657895 | 0.829918 | 1 | 2121 tags=18%, list=13%, signal=21% | 0.281332  | 0.946337  | 0.585821   | 0.793812  | 1                                   | 3129 tags=24%, list=19%, signal=30% |
| NUCLEAR_MEMBRANE_PART             | 37  | 0.344928 | 0.923281 | 0.590705 | 0.829732 | 1 | 2927 tags=32%, list=18%, signal=40% | 0.505739  | 1.37433   | 0.061747   | 0.212936  | 1                                   | 3199 tags=35%, list=20%, signal=44% |
| GSE29618_LAIV_VS_TIV_FLU_VACCIN   | 171 | 0.276068 | 0.923061 | 0.629988 | 0.829943 | 1 | 2744 tags=18%, list=17%, signal=21% | 0.248925  | 0.842156  | 0.86995    | 0.912972  | 1                                   | 2105 tags=14%, list=13%, signal=16% |
| GSE12366_PLASMA_CELL_VS_MEMO      | 169 | 0.275571 | 0.922595 | 0.653465 | 0.830883 | 1 | 3288 tags=31%, list=20%, signal=38% | -0.336992 | -1.28224  | 0.02       | 0.350367  | 1                                   | 3756 tags=45%, list=23%, signal=58% |
| NUCLEAR_MEMBRANE                  | 44  | 0.332327 | 0.921019 | 0.599106 | 0.835208 | 1 | 2927 tags=32%, list=18%, signal=39% | 0.463234  | 1.29337   | 0.101227   | 0.296857  | 1                                   | 3199 tags=34%, list=20%, signal=42% |
| GSE8515_CTRL_VS_IL1_4H_STIM_MA    | 168 | 0.28033  | 0.920313 | 0.656028 | 0.836689 | 1 | 3414 tags=27%, list=21%, signal=34% | 0.246957  | 0.824504  | 0.882576   | 0.931866  | 1                                   | 4063 tags=30%, list=25%, signal=40% |
| GSE27786_NKCELL_VS_ERYTHROBLAS    | 173 | 0.277853 | 0.920248 | 0.667877 | 0.836648 | 1 | 2718 tags=25%, list=17%, signal=30% | 0.226503  | 0.708713  | 0.967825   | 0.978169  | 1                                   | 3967 tags=31%, list=25%, signal=41% |
| OXIDOREDUCTASE_ACTIVITY           | 254 | 0.269591 | 0.920217 | 0.685549 | 0.836289 | 1 | 3108 tags=23%, list=19%, signal=28% | 0.323127  | 1.13905   | 0.134911   | 0.512232  | 1                                   | 3409 tags=27%, list=21%, signal=33% |
| GSE27786_CD4_TCELL_VS_ERYTHRO     | 171 | 0.279096 | 0.9201   | 0.675121 | 0.836173 | 1 | 2205 tags=20%, list=14%, signal=23% | -0.234275 | -0.89056  | 0.845745   | 0.886687  | 1                                   | 1955 tags=20%, list=12%, signal=23% |
| GSE360_L_DONOVANI_VS_B_MALAYI     | 172 | 0.276995 | 0.91994  | 0.677778 | 0.83619  | 1 | 3190 tags=24%, list=20%, signal=29% | -0.258372 | -0.998208 | 0.444976   | 0.660651  | 1                                   | 1496 tags=16%, list=9%, signal=17%  |
| GSE17974_2.5H_VS_72H_IL4_AND_A    | 169 | 0.278509 | 0.919819 | 0.672435 | 0.836108 | 1 | 3367 tags=29%, list=21%, signal=36% | -0.283316 | -1.08614  | 0.812266   | 0.539809  | 1                                   | 2621 tags=30%, list=16%, signal=35% |
| GSE2706_R848_VS_LPS_8H_STIM_DC    | 127 | 0.28604  | 0.919462 | 0.631783 | 0.836721 | 1 | 3443 tags=24%, list=21%, signal=30% | -0.306158 | -1.13725  | 0.130841   | 0.471654  | 1                                   | 2639 tags=22%, list=16%, signal=26% |
| APOPTOTIC_NUCLEAR_CHANGES         | 16  | 0.406409 | 0.91944  | 0.568392 | 0.836342 | 1 | 1470 tags=25%, list=9%, signal=27%  | 0.43993   | 0.988409  | 0.499182   | 0.753857  | 1                                   | 2550 tags=38%, list=16%, signal=45% |
| GSE1432_CTRL_VS_IFNG_24H_MICRC    | 168 | 0.278716 | 0.919136 | 0.664151 | 0.836804 | 1 | 3113 tags=26%, list=19%, signal=32% | 0.297318  | 0.996047  | 0.491272   | 0.746839  | 1                                   | 2878 tags=27%, list=18%, signal=32% |
| PATTERN_BINDING                   | 39  | 0.341593 | 0.918922 | 0.59276  | 0.836991 | 1 | 1019 tags=13%, list=6%, signal=14%  | -0.312945 | -0.944733 | 0.535014   | 0.768098  | 1                                   | 2847 tags=23%, list=18%, signal=28% |
| GSE36476_YOUNG_VS_OLD_DONOR       | 171 | 0.277017 | 0.918863 | 0.670412 | 0.836724 | 1 | 2339 tags=23%, list=15%, signal=26% | 0.3965    | 1.32978   | 0.18226    | 0.261982  | 1                                   | 2137 tags=30%, list=13%, signal=34% |
| GSE360_L_MAJOR_VS_B_MALAYI_HI     | 170 | 0.27689  | 0.918478 | 0.6804   | 0.837442 | 1 | 1834 tags=18%, list=11%, signal=20% | 0.382321  | 1.28964   | 0.032419   | 0.302579  | 1                                   | 2347 tags=27%, list=15%, signal=31% |
| GSE9505_GP33_VS_GP276_LCMV_SCP    | 182 | 0.272398 | 0.918475 | 0.665446 | 0.837009 | 1 | 2484 tags=18%, list=15%, signal=21% | 0.305226  | 1.02718   | 0.398313   | 0.70253   | 1                                   | 3169 tags=23                        |



Supplementary Table 3. Gene enrichment statistics for HD and control monkeys.

|                                  |     |          |          |          |          |   |                                     |           |           |            |           |       |                                     |
|----------------------------------|-----|----------|----------|----------|----------|---|-------------------------------------|-----------|-----------|------------|-----------|-------|-------------------------------------|
| ATP_BINDING                      | 145 | 0.279115 | 0.913109 | 0.666667 | 0.843208 | 1 | 3609 tags=30%, list=22%, signal=39% | -0.289847 | -1.08127  | 0.233184   | 0.539815  | 1     | 1971 tags=23%, list=12%, signal=26% |
| GSE27786_BCELL_VS_NEUTROPHIL_D   | 175 | 0.27465  | 0.913047 | 0.690158 | 0.842969 | 1 | 3121 tags=22%, list=19%, signal=27% | 0.280395  | 0.945004  | 0.598513   | 0.792668  | 1     | 3830 tags=29%, list=24%, signal=38% |
| RAS_GTPASE_ACTIVATOR_ACTIVITY    | 24  | 0.369467 | 0.912589 | 0.588957 | 0.843858 | 1 | 1122 tags=17%, list=7%, signal=18%  | -0.34902  | -0.927577 | 0.5625     | 0.805058  | 1     | 3873 tags=50%, list=24%, signal=66% |
| GSE7460_CDR_TCELL_VS_CD4_TCELL   | 177 | 0.274243 | 0.912297 | 0.679707 | 0.8443   | 1 | 2701 tags=20%, list=14%, signal=23% | 0.253432  | 0.845399  | 0.848887   | 0.912707  | 1     | 2986 tags=24%, list=19%, signal=29% |
| REGULATION_OF_ORGANELLE_ORGA     | 37  | 0.340555 | 0.911813 | 0.622189 | 0.845228 | 1 | 855 tags=14%, list=5%, signal=14%   | 0.427389  | 1.15127   | 0.233588   | 0.492403  | 1     | 2666 tags=35%, list=17%, signal=42% |
| PORE_COMPLEX                     | 31  | 0.356917 | 0.911266 | 0.603945 | 0.845321 | 1 | 2927 tags=29%, list=18%, signal=35% | 0.538163  | 1.43309   | 0.0513644  | 0.160549  | 1     | 1656 tags=23%, list=10%, signal=25% |
| THIOLESTER_HYDROLASE_ACTIVITY    | 15  | 0.414032 | 0.911266 | 0.582781 | 0.845911 | 1 | 1589 tags=27%, list=10%, signal=30% | 0.436866  | 0.990194  | 0.469372   | 0.750158  | 1     | 3081 tags=33%, list=19%, signal=41% |
| GSE360_LOW_NOISE_B_MALAYI_VS_M   | 177 | 0.276345 | 0.911224 | 0.682103 | 0.845548 | 1 | 3263 tags=27%, list=20%, signal=33% | 0.436339  | 1.47515   | 0.00246609 | 0.137156  | 1     | 3455 tags=37%, list=22%, signal=47% |
| GSE22886_NAVE_CD4_TCELL_VS_MC    | 166 | 0.274344 | 0.911134 | 0.709047 | 0.845421 | 1 | 2472 tags=24%, list=15%, signal=28% | -0.254101 | -0.969631 | 0.530516   | 0.723379  | 1     | 1166 tags=15%, list=7%, signal=16%  |
| MICROBODY                        | 44  | 0.32529  | 0.91039  | 0.633782 | 0.847117 | 1 | 2759 tags=34%, list=17%, signal=41% | 0.399801  | 1.11591   | 0.267496   | 0.542073  | 1     | 3846 tags=36%, list=24%, signal=48% |
| GSE17721_CTRL_VS_PAM3CSK4_8H_U   | 173 | 0.275105 | 0.910372 | 0.695913 | 0.846727 | 1 | 3329 tags=24%, list=21%, signal=30% | 0.262629  | 0.885401  | 0.8753291  | 0.875402  | 1     | 3200 tags=23%, list=20%, signal=28% |
| GSE17721_POLYIC_VS_GARDIQUIMO    | 182 | 0.272879 | 0.910169 | 0.691477 | 0.846896 | 1 | 3133 tags=24%, list=20%, signal=30% | 0.258574  | 0.872165  | 0.766089   | 0.891139  | 1     | 3719 tags=30%, list=23%, signal=38% |
| GSE30083_SP1_VS_SP4_THYMOCYTE    | 169 | 0.27473  | 0.910154 | 0.711844 | 0.846503 | 1 | 1975 tags=20%, list=12%, signal=23% | -0.280984 | -1.08007  | 0.238095   | 0.541303  | 1     | 2052 tags=22%, list=13%, signal=26% |
| GSE7460_TREG_VS_TCONV_ACT_DN     | 166 | 0.272733 | 0.910107 | 0.682776 | 0.846199 | 1 | 2759 tags=21%, list=17%, signal=25% | 0.250726  | 0.839918  | 0.830573   | 0.914801  | 1     | 2446 tags=17%, list=15%, signal=20% |
| GSE17721_CTRL_VS_PAM3CSK4_4H_U   | 173 | 0.273693 | 0.909906 | 0.683636 | 0.846337 | 1 | 2894 tags=24%, list=18%, signal=29% | 0.365244  | 1.21492   | 0.0767296  | 0.412369  | 1     | 3260 tags=38%, list=20%, signal=47% |
| GSE17974_CTRL_VS_ACT_IL4_AND_A   | 158 | 0.276995 | 0.909222 | 0.688482 | 0.847877 | 1 | 2737 tags=21%, list=17%, signal=25% | 0.27649   | 0.915754  | 0.672457   | 0.833082  | 1     | 2826 tags=22%, list=18%, signal=27% |
| POSITIVE_REGULATION_OF_TRANSPC   | 23  | 0.372466 | 0.909162 | 0.619048 | 0.847632 | 1 | 2227 tags=26%, list=14%, signal=30% | 0.298654  | 0.737495  | 0.868502   | 0.987979  | 1     | 2519 tags=17%, list=16%, signal=21% |
| CARBOXYLESTERASE_ACTIVITY        | 30  | 0.354372 | 0.909056 | 0.618271 | 0.847498 | 1 | 1778 tags=13%, list=11%, signal=15% | 0.497115  | 1.29263   | 0.121359   | 0.296593  | 1     | 1651 tags=20%, list=10%, signal=22% |
| GSE29618_PRE_VS_DAY7_POST_LAIV   | 172 | 0.273433 | 0.90896  | 0.69125  | 0.847334 | 1 | 2332 tags=19%, list=15%, signal=22% | -0.344781 | -1.33304  | 0          | 0.339329  | 1     | 2457 tags=30%, list=15%, signal=35% |
| GSE17721_LPS_VS_GARDIQUIMO161    | 174 | 0.271667 | 0.908923 | 0.694581 | 0.846998 | 1 | 2745 tags=25%, list=17%, signal=30% | -0.278399 | -1.07161  | 0.248705   | 0.553514  | 1     | 1777 tags=23%, list=11%, signal=26% |
| GSE10325_MYELOID_VS_LUPUS_MYE    | 171 | 0.273727 | 0.908847 | 0.692588 | 0.846795 | 1 | 3460 tags=30%, list=22%, signal=38% | 0.299315  | 0.997974  | 0.490361   | 0.743153  | 1     | 2995 tags=28%, list=19%, signal=34% |
| GSE27786_CD4_TCELL_VS_NKTCCELL_I | 179 | 0.273026 | 0.90883  | 0.699147 | 0.8464   | 1 | 3631 tags=28%, list=23%, signal=36% | 0.359946  | 1.20492   | 0.0787208  | 0.424347  | 1     | 3106 tags=31%, list=19%, signal=38% |
| PHOSPHOINOSITIDE_MEDIATED_SGN    | 45  | 0.325691 | 0.908799 | 0.636232 | 0.846053 | 1 | 2638 tags=18%, list=16%, signal=21% | 0.330264  | 0.923732  | 0.95128    | 0.823458  | 1     | 1521 tags=13%, list=9%, signal=15%  |
| GSE17721_POLYIC_VS_PAM3CSK4_1F   | 183 | 0.273417 | 0.90876  | 0.708333 | 0.845734 | 1 | 3522 tags=27%, list=22%, signal=34% | -0.253328 | -0.981822 | 0.518868   | 0.696496  | 1     | 3051 tags=29%, list=19%, signal=35% |
| GSE360_L_DONOVANI_VS_B_MALAYI    | 179 | 0.274365 | 0.908729 | 0.695547 | 0.845383 | 1 | 3108 tags=21%, list=19%, signal=26% | 0.26724   | 0.906715  | 0.672457   | 0.843742  | 1     | 2542 tags=21%, list=16%, signal=24% |
| GSE22886_IGG_IGA_MEMORY_BCELL    | 173 | 0.275622 | 0.90843  | 0.689781 | 0.845775 | 1 | 4262 tags=35%, list=27%, signal=47% | 0.338195  | 1.1474    | 0.186567   | 0.495638  | 1     | 3261 tags=29%, list=20%, signal=37% |
| GSE17721_CTRL_VS_CPG_1H_BMDM     | 174 | 0.273688 | 0.908363 | 0.684729 | 0.845535 | 1 | 2973 tags=25%, list=19%, signal=31% | 0.370092  | 1.24773   | 0.0628853  | 0.362433  | 1     | 3193 tags=34%, list=20%, signal=43% |
| GSE15659_RESTING_TREG_VS_NONSI   | 143 | 0.278417 | 0.908301 | 0.690955 | 0.845265 | 1 | 2901 tags=20%, list=18%, signal=24% | 0.261306  | 0.868635  | 0.785436   | 0.894013  | 1     | 1801 tags=11%, list=11%, signal=12% |
| GUANYL_NUCLEOTIDE_EXCHANGE_FJ    | 40  | 0.335444 | 0.907996 | 0.628447 | 0.845705 | 1 | 1689 tags=18%, list=11%, signal=20% | 0.336616  | 0.92867   | 0.603744   | 0.814158  | 1     | 3935 tags=38%, list=25%, signal=50% |
| GSE9037_WT_VS_IRAK4_KO_BMDM_I    | 180 | 0.271336 | 0.907825 | 0.702703 | 0.845769 | 1 | 2706 tags=23%, list=17%, signal=27% | -0.395533 | -1.55203  | 0          | 0.308228  | 0.994 | 3312 tags=36%, list=21%, signal=45% |
| GSE15930_STIM_VS_STIM_AND_IFN    | 169 | 0.273114 | 0.907526 | 0.698663 | 0.846193 | 1 | 2722 tags=20%, list=17%, signal=23% | 0.277944  | 0.94101   | 0.599241   | 0.799464  | 1     | 4014 tags=28%, list=25%, signal=37% |
| GSE17721_CTRL_VS_POLYIC_4H_BMC   | 184 | 0.270705 | 0.907056 | 0.697842 | 0.84711  | 1 | 2261 tags=20%, list=14%, signal=23% | -0.247327 | -0.952969 | 0.625      | 0.76511   | 1     | 2981 tags=27%, list=19%, signal=32% |
| GSE17721_CTRL_VS_CPG_6H_BMDM     | 179 | 0.270611 | 0.906958 | 0.67866  | 0.846693 | 1 | 2850 tags=20%, list=18%, signal=24% | 0.29644   | 0.999518  | 0.466091   | 0.741215  | 1     | 2530 tags=22%, list=16%, signal=26% |
| GSE360_CTRL_VS_M_TUBERCULOSIS    | 178 | 0.269966 | 0.906545 | 0.698091 | 0.847717 | 1 | 3391 tags=25%, list=21%, signal=31% | 0.347007  | 1.16752   | 0.148193   | 0.468844  | 1     | 3589 tags=37%, list=22%, signal=47% |
| ACETYLTRANSFERASE_ACTIVITY       | 23  | 0.370397 | 0.906306 | 0.579666 | 0.847965 | 1 | 3654 tags=39%, list=23%, signal=51% | 0.336634  | 0.828178  | 0.725203   | 0.928188  | 1     | 2629 tags=26%, list=16%, signal=31% |
| RESPONSE_TO_EXTRACELLULAR_STIM   | 30  | 0.350548 | 0.905353 | 0.610932 | 0.850303 | 1 | 5859 tags=47%, list=37%, signal=73% | 0.437284  | 1.15051   | 0.244094   | 0.489646  | 1     | 2812 tags=27%, list=18%, signal=32% |
| GSE39820_TGFBETA1_VS_TGFBETA3    | 169 | 0.272741 | 0.905021 | 0.701493 | 0.850841 | 1 | 2841 tags=19%, list=18%, signal=23% | 0.270388  | 0.915801  | 0.686493   | 0.833415  | 1     | 4488 tags=31%, list=28%, signal=42% |
| GSE17721_LPS_VS_CPG_2H_BMDM_I    | 169 | 0.273283 | 0.904846 | 0.700361 | 0.850914 | 1 | 3424 tags=23%, list=21%, signal=29% | 0.340029  | 1.13589   | 0.191542   | 0.516197  | 1     | 3728 tags=31%, list=23%, signal=40% |
| GSE29617_CTRL_VS_TIV_FLU_VACCIN  | 177 | 0.272913 | 0.903981 | 0.716526 | 0.85297  | 1 | 1957 tags=15%, list=12%, signal=17% | 0.325459  | 1.1075    | 0.249703   | 0.554231  | 1     | 2508 tags=25%, list=16%, signal=29% |
| OXIDOREDUCTASE_ACTIVITY_ACTING   | 21  | 0.37362  | 0.903644 | 0.606159 | 0.853472 | 1 | 2332 tags=24%, list=15%, signal=28% | 0.317143  | 0.769358  | 0.835749   | 0.974355  | 1     | 3108 tags=29%, list=19%, signal=35% |
| GSE18791_UNSTIM_VS_NEWCATSLE     | 134 | 0.279923 | 0.903442 | 0.69201  | 0.853617 | 1 | 2761 tags=17%, list=17%, signal=21% | 0.259652  | 0.843908  | 0.810323   | 0.91148   | 1     | 2908 tags=17%, list=18%, signal=21% |
| GSE13493_DP_VS_CD8POS_THYMOCC    | 169 | 0.272596 | 0.903056 | 0.702337 | 0.854271 | 1 | 2800 tags=22%, list=17%, signal=27% | 0.298914  | 1.00409   | 0.407955   | 0.738274  | 1     | 3634 tags=32%, list=23%, signal=41% |
| GSE17721_POLYIC_VS_PAM3CSK4_4F   | 175 | 0.271868 | 0.903004 | 0.700121 | 0.853968 | 1 | 1881 tags=16%, list=12%, signal=18% | 0.25798   | 0.868449  | 0.870782   | 0.894043  | 1     | 2322 tags=18%, list=14%, signal=21% |
| MITOTIC_CELL_CYCLE_CHECKPOINT    | 19  | 0.382723 | 0.902289 | 0.580952 | 0.855564 | 1 | 4258 tags=47%, list=27%, signal=64% | 0.417     | 0.979842  | 0.480207   | 0.763744  | 1     | 1805 tags=26%, list=11%, signal=30% |
| GSE17721_POLYIC_VS_CPG_2H_BMD    | 182 | 0.271047 | 0.902226 | 0.7046   | 0.855305 | 1 | 2490 tags=25%, list=16%, signal=29% | -0.270387 | -1.04163  | 0.318681   | 0.60081   | 1     | 2421 tags=25%, list=15%, signal=29% |
| GSE24142_EARLY_THYMIC_PROGENI    | 174 | 0.27282  | 0.902025 | 0.719255 | 0.855422 | 1 | 3647 tags=30%, list=23%, signal=39% | 0.334354  | 1.12315   | 0.209559   | 0.533139  | 1     | 3667 tags=36%, list=23%, signal=46% |
| GSE13738_TCR_VS_BYSTANDER_ACTI   | 173 | 0.271348 | 0.901786 | 0.712121 | 0.855723 | 1 | 1751 tags=18%, list=11%, signal=21% | 0.295517  | 0.987055  | 0.498089   | 0.75181   | 1     | 2588 tags=23%, list=16%, signal=27% |
| REGULATION_OF_HEART_CONTRACT     | 23  | 0.367967 | 0.901618 | 0.598716 | 0.855747 | 1 | 475 tags=9%, list=3%, signal=9%     | 0.419641  | 1.0228    | 0.422512   | 0.7044    | 1     | 4371 tags=35%, list=27%, signal=48% |
| GSE14026_TH1_VS_TH17_DN          | 178 | 0.271956 | 0.901604 | 0.711165 | 0.855354 | 1 | 3100 tags=22%, list=19%, signal=27% | 0.241054  | 0.808344  | 0.923821   | 0.949093  | 1     | 3355 tags=24%, list=21%, signal=30% |
| GSE13485_DAY3_VS_DAY21_YF17D_U   | 161 | 0.274414 | 0.901098 | 0.701474 | 0.855687 | 1 | 3084 tags=29%, list=19%, signal=36% | -0.264085 | -0.994141 | 0.808952   | 0.668796  | 1     | 2617 tags=20%, list=16%, signal=35% |
| GSE17721_0_5H_VS_12H_GARDIQU     | 180 | 0.269018 | 0.900739 | 0.71481  | 0.856923 | 1 | 3064 tags=25%, list=19%, signal=31% | 0.298274  | 1.00969   | 0.450617   | 0.727721  | 1     | 2620 tags=25%, list=16%, signal=30% |
| GSE15659_NAVE_CD4_TCELL_VS_RE    | 159 | 0.273503 | 0.900567 | 0.707674 | 0.857039 | 1 | 3916 tags=25%, list=24%, signal=32% | 0.302098  | 1.00559   | 0.491865   | 0.73438   | 1     | 3702 tags=26%, list=23%, signal=33% |
| GSE13493_CD4INTCD8POS_VS_CD8P    | 170 | 0.271483 | 0.900382 | 0.719298 | 0.857112 | 1 | 3674 tags=27%, list=23%, signal=35% | 0.270171  | 0.901962  | 0.71411    | 0.852119  | 1     | 2632 tags=21%, list=16%, signal=25% |
| GSE27786_CD8_TCELL_VS_NKCELL_U   | 171 | 0.270506 | 0.899848 | 0.706918 | 0.858217 | 1 | 2770 tags=20%, list=17%, signal=24% | -0.252875 | -0.959636 | 0.579208   | 0.748379  | 1     | 2810 tags=27%, list=18%, signal=33% |
| VESICLE_MEMBRANE                 | 28  | 0.353604 | 0.899766 | 0.6176   | 0.858014 | 1 | 2193 tags=18%, list=14%, signal=21% | 0.621577  | 1.60266   | 0.00445765 | 0.0681675 | 0.989 | 3179 tags=50%, list=20%, signal=62% |
| GSE31082_DN_VS_CD4_SP_THYMOCC    | 174 | 0.272165 | 0.899471 | 0.709091 | 0.858412 | 1 | 3124 tags=27%, list=19%, signal=33% | -0.247369 | -0.947018 | 0.653846   | 0.766286  | 1     | 3663 tags=36%, list=23%, signal=46% |
| GSE360_L_MAJOR_VS_M_TUBERCUL     | 175 | 0.269516 | 0.899019 | 0.727047 | 0.85926  | 1 | 4564 tags=36%, list=28%, signal=50% | 0.271353  | 0.91707   | 0.689394   | 0.833017  | 1     | 4028 tags=31%, list=25%, signal=41% |
| GSE7852_UN_VS_THYMU5_TCONV_U     | 175 | 0.271857 | 0.898697 | 0.728834 | 0.859736 | 1 | 2988 tags=27%, list=19%, signal=33% | -0.286342 | -1.10106  | 0.164103   | 0.52504   | 1     | 2010 tags=22%, list=13%, signal=25% |
| GSE20715_WT_VS_TLR4_KO_6H_OZC    | 176 | 0.268248 | 0.898353 | 0.735618 | 0.860281 | 1 | 2966 tags=23%, list=18%, signal=28% | 0.283975  | 0.960046  | 0.656158   | 0.776194  | 1     | 1318 tags=14%, list=8%, signal=15%  |
| GSE3337_CTRL_VS_4H_IFNG_IN_CDR   | 178 | 0.266052 | 0.898005 | 0.72401  | 0.860803 | 1 | 3064 tags=22%, list=19%, signal=27% | -0.259469 | -0.997173 | 0.471154   | 0.661148  | 1     | 1719 tags=18%, list=11%, signal=20% |
| GSE17721_12H_VS_24H_POLYIC_BM    | 185 | 0.268995 | 0.897375 | 0.735115 | 0.862106 | 1 | 2184 tags=20%, list=14%, signal=23% | 0.259629  | 0.877537  | 0.777094   | 0.884862  | 1     | 3565 tags=31%, list=22%, signal=39% |
| GSE9006_HEALTHY_VS_TYPE_1_DIAB   | 163 | 0.271911 | 0.89731  | 0.691566 | 0.861855 | 1 | 1862 tags=14%, list=12%, signal=16% | 0.289505  | 0.969463  | 0.532216   | 0.772582  | 1     | 3097 tags=24%, list=19%, signal=29% |
| GSE360_T_GONDI_VS_M_TUBERCUL     | 174 | 0.268901 | 0.897304 | 0.70073  | 0.861439 | 1 | 3238 tags=22%, list=20%, signal=27% | 0.413186  | 1.39627   | 0.00875    | 0.195414  | 1     | 2504 tags=27%, list=16%, signal=32% |
| ENZYMIC_INHIBITOR_ACTIVITY       | 106 | 0.284552 | 0.897124 | 0.696287 | 0.861496 | 1 | 2938 tags=20%, list=18%, signal=24% | 0.327851  | 1.0498    | 0.538908   |           |       |                                     |

Supplementary Table 3. Gene enrichment statistics for HD and control monkeys.

27

|                                                |     |          |          |          |          |   |                                     |           |           |            |          |   |                                     |
|------------------------------------------------|-----|----------|----------|----------|----------|---|-------------------------------------|-----------|-----------|------------|----------|---|-------------------------------------|
| GSE17974_CTRL_VS_ACT_IL4_AND_A                 | 170 | 0.269335 | 0.891364 | 0.755772 | 0.870049 | 1 | 2627 tags=23%, list=16%, signal=27% | -0.308883 | -1.19     | 0.0457143  | 0.437898 | 1 | 1977 tags=24%, list=12%, signal=27% |
| GTP_BINDING                                    | 42  | 0.325209 | 0.890649 | 0.669219 | 0.871646 | 1 | 1346 tags=17%, list=8%, signal=18%  | 0.388232  | 1.07837   | 0.388232   | 0.603532 | 1 | 3505 tags=38%, list=22%, signal=49% |
| GSE1460_CDA_THYMOCYTE_VS_NAIV                  | 167 | 0.270094 | 0.890601 | 0.76     | 0.871348 | 1 | 1856 tags=16%, list=12%, signal=17% | -0.269145 | -1.0352   | 0.285      | 0.60194  | 1 | 2586 tags=28%, list=16%, signal=33% |
| GSE17721_LPS_VS_PAM3CSK4_6H_BI                 | 184 | 0.267633 | 0.890594 | 0.748139 | 0.870934 | 1 | 3502 tags=24%, list=22%, signal=31% | 0.242608  | 0.822225  | 0.903305   | 0.935068 | 1 | 4190 tags=30%, list=26%, signal=40% |
| ACTIN_FILAMENT_ORGANIZATION                    | 21  | 0.369568 | 0.890272 | 0.61254  | 0.871349 | 1 | 3103 tags=24%, list=19%, signal=29% | -0.278561 | -0.734753 | 0.899225   | 0.996007 | 1 | 19 tags=5%, list=0%, signal=5%      |
| GSE18791_CTRL_VS_NEWCASTLE_VIR                 | 167 | 0.268543 | 0.889518 | 0.755501 | 0.872921 | 1 | 3506 tags=28%, list=22%, signal=35% | -0.316333 | -1.20553  | 0.037037   | 0.42475  | 1 | 2788 tags=30%, list=17%, signal=41% |
| GSE11864_CSF1_IFNG_VS_CSF1_IFNG                | 174 | 0.266346 | 0.88916  | 0.75495  | 0.872817 | 1 | 2858 tags=25%, list=18%, signal=30% | 0.355817  | 1.18949   | 0.119018   | 0.441428 | 1 | 3138 tags=33%, list=20%, signal=36% |
| GSE7852_LN_VS_FAT_TREG_UP                      | 185 | 0.264395 | 0.888825 | 0.745882 | 0.873978 | 1 | 3332 tags=30%, list=21%, signal=37% | 0.317923  | 1.07067   | 0.3        | 0.623329 | 1 | 2990 tags=30%, list=19%, signal=37% |
| GSE17721_0.5H_VS_24H_POLYIC_BM                 | 171 | 0.27002  | 0.888697 | 0.750306 | 0.873879 | 1 | 3353 tags=24%, list=21%, signal=30% | 0.293696  | 0.986605  | 0.504926   | 0.749998 | 1 | 3535 tags=29%, list=22%, signal=37% |
| GSE17974_0H_VS_12H_IN_VITRO_AC                 | 172 | 0.268516 | 0.888697 | 0.752463 | 0.873444 | 1 | 3361 tags=30%, list=21%, signal=37% | 0.382026  | 1.2748    | 0.0417193  | 0.318713 | 1 | 2182 tags=26%, list=14%, signal=29% |
| GSE7460_CTRL_VS_TGFB_TREATED_A                 | 170 | 0.267569 | 0.888635 | 0.729352 | 0.873171 | 1 | 3051 tags=25%, list=19%, signal=30% | -0.252345 | -0.96519  | 0.568528   | 0.736193 | 1 | 3314 tags=34%, list=21%, signal=43% |
| GSE14308_TH1_VS_NAIVE_CD4_TCELL                | 173 | 0.267249 | 0.88858  | 0.741104 | 0.872887 | 1 | 2732 tags=23%, list=17%, signal=28% | 0.302202  | 1.01934   | 0.423816   | 0.708965 | 1 | 1282 tags=14%, list=8%, signal=16%  |
| GSE17721_CTRL_VS_LPS_4H_BMDM_T_CELL_ACTIVATION | 39  | 0.267635 | 0.888409 | 0.773608 | 0.872934 | 1 | 3526 tags=28%, list=22%, signal=35% | 0.255455  | 0.860694  | 0.794776   | 0.898376 | 1 | 3503 tags=32%, list=22%, signal=40% |
| POSITIVE_REGULATION_OF_TRANSCR                 | 22  | 0.372001 | 0.888197 | 0.629747 | 0.872671 | 1 | 2522 tags=28%, list=16%, signal=33% | 0.417165  | 1.14295   | 0.257009   | 0.507274 | 1 | 2545 tags=31%, list=16%, signal=36% |
| GSE2197_IMMUNOSUPPRESSIVE_DN                   | 187 | 0.267261 | 0.888165 | 0.76348  | 0.872318 | 1 | 2502 tags=27%, list=16%, signal=32% | 0.266364  | 0.648101  | 0.958266   | 0.997479 | 1 | 3560 tags=32%, list=22%, signal=41% |
| GSE17721_CPG_VS_GARDIQUIMOD_C                  | 182 | 0.266973 | 0.887726 | 0.747253 | 0.873081 | 1 | 3230 tags=28%, list=20%, signal=35% | 0.298878  | 1.01205   | 0.438788   | 0.72731  | 1 | 2631 tags=25%, list=16%, signal=29% |
| GSE339_CD8POS_VS_CD4CD8DN_DC                   | 181 | 0.263931 | 0.886541 | 0.753071 | 0.875081 | 1 | 3319 tags=26%, list=21%, signal=32% | 0.291718  | 1.00613   | 0.444305   | 0.734044 | 1 | 1658 tags=17%, list=10%, signal=19% |
| GSE17721_POLYIC_VS_CPG_0.5H_BM                 | 182 | 0.268284 | 0.886243 | 0.761847 | 0.876279 | 1 | 4069 tags=33%, list=25%, signal=43% | -0.298706 | -1.16055  | 0.0717949  | 0.45956  | 1 | 2575 tags=30%, list=16%, signal=35% |
| GSE17721_PAM3CSK4_VS_CPG_12H                   | 173 | 0.267184 | 0.886202 | 0.752439 | 0.875944 | 1 | 3292 tags=27%, list=21%, signal=34% | 0.328172  | 1.10416   | 0.241594   | 0.555591 | 1 | 2117 tags=22%, list=13%, signal=25% |
| GSE24142_DN2_VS_DN3_THYMOCYT                   | 187 | 0.263839 | 0.885923 | 0.774115 | 0.876281 | 1 | 3541 tags=27%, list=22%, signal=34% | -0.245094 | -0.946829 | 0.647059   | 0.766767 | 1 | 2458 tags=25%, list=15%, signal=29% |
| GSE17721_PAM3CSK4_VS_GADIQUIV                  | 176 | 0.266026 | 0.884697 | 0.754902 | 0.879131 | 1 | 3079 tags=27%, list=19%, signal=33% | 0.312034  | 1.04412   | 0.363184   | 0.676021 | 1 | 2613 tags=22%, list=16%, signal=27% |
| GSE29618_LAI_VS_TIV_FLU_VACCIN                 | 167 | 0.267797 | 0.884535 | 0.754279 | 0.879132 | 1 | 2827 tags=20%, list=18%, signal=24% | 0.30245   | 1.02847   | 0.395109   | 0.699848 | 1 | 3002 tags=27%, list=19%, signal=33% |
| GSE13411_NAIVE_VS_MEMORY_BCELL                 | 173 | 0.265778 | 0.883934 | 0.746617 | 0.880339 | 1 | 2332 tags=17%, list=15%, signal=19% | 0.247325  | 0.834989  | 0.861423   | 0.919519 | 1 | 3653 tags=28%, list=23%, signal=35% |
| GSE18148_CBF8_KO_VS_WT_TREG_C                  | 178 | 0.264477 | 0.883795 | 0.760241 | 0.880253 | 1 | 3551 tags=29%, list=22%, signal=37% | 0.406544  | 1.36481   | 0.00862669 | 0.223141 | 1 | 3507 tags=40%, list=22%, signal=50% |
| GSE39820_TGFBETA1_VS_TGFBETA3                  | 188 | 0.26231  | 0.883606 | 0.779661 | 0.880324 | 1 | 3567 tags=19%, list=22%, signal=24% | -0.248838 | -0.960336 | 0.631868   | 0.748009 | 1 | 1707 tags=11%, list=11%, signal=12% |
| GSE22886_TCELL_VS_BCELL_NAIVE_L                | 171 | 0.266143 | 0.883552 | 0.76319  | 0.880032 | 1 | 4103 tags=34%, list=26%, signal=45% | -0.256239 | -1.00113  | 0.394872   | 0.654545 | 1 | 2488 tags=28%, list=15%, signal=32% |
| GSE26495_PD1HIGH_VS_PD1LOW_CI                  | 137 | 0.270889 | 0.883124 | 0.749383 | 0.880766 | 1 | 3685 tags=30%, list=23%, signal=39% | 0.306402  | 1.03025   | 0.388191   | 0.699341 | 1 | 2988 tags=33%, list=19%, signal=40% |
| GSE1460_DP_VS_CD4_THYMOCYTE_I                  | 170 | 0.265198 | 0.88304  | 0.750627 | 0.880555 | 1 | 2045 tags=19%, list=13%, signal=22% | 0.358446  | 1.18134   | 0.134465   | 0.44879  | 1 | 3885 tags=36%, list=24%, signal=47% |
| GSE17580_UNINFECTED_VS_S_MANS                  | 175 | 0.265391 | 0.882659 | 0.750916 | 0.881124 | 1 | 2686 tags=20%, list=17%, signal=24% | -0.272151 | -1.04644  | 0.306222   | 0.590829 | 1 | 2010 tags=22%, list=13%, signal=25% |
| GSE7764_IL15_NK_CELL_24H_VS_SPL                | 176 | 0.265917 | 0.882356 | 0.752158 | 0.881495 | 1 | 3164 tags=25%, list=20%, signal=31% | 0.30929   | 1.0448    | 0.362854   | 0.674609 | 1 | 1847 tags=19%, list=12%, signal=21% |
| GSE360_L_DONOVANI_VS_L_MAJOR                   | 180 | 0.266375 | 0.882261 | 0.762712 | 0.881309 | 1 | 3301 tags=27%, list=21%, signal=34% | -0.283581 | -1.077    | 0.238318   | 0.539376 | 1 | 3261 tags=38%, list=20%, signal=47% |
| GSE20715_WT_VS_TLR4_KO_48H_OZ                  | 174 | 0.264765 | 0.881753 | 0.756303 | 0.882215 | 1 | 3129 tags=19%, list=19%, signal=23% | -0.249823 | -0.958662 | 0.617021   | 0.748731 | 1 | 1857 tags=16%, list=12%, signal=17% |
| INTERACTION_WITH_HOST                          | 15  | 0.404182 | 0.881269 | 0.63837  | 0.883076 | 1 | 3237 tags=23%, list=20%, signal=28% | 0.266444  | 0.88672   | 0.738402   | 0.872748 | 1 | 2839 tags=22%, list=18%, signal=26% |
| GSE360_L_DONOVANI_VS_M_TUBER                   | 182 | 0.26518  | 0.880784 | 0.764347 | 0.8839   | 1 | 1896 tags=27%, list=12%, signal=30% | -0.363403 | -0.896827 | 0.561576   | 0.876916 | 1 | 3936 tags=33%, list=19%, signal=35% |
| GSE24142_DN2_VS_DN3_THYMOCYT                   | 184 | 0.26018  | 0.880707 | 0.765281 | 0.883769 | 1 | 3046 tags=23%, list=19%, signal=28% | 0.373706  | 1.26169   | 0.047561   | 0.341547 | 1 | 2658 tags=30%, list=17%, signal=36% |
| GSE27786_LIN_NEG_VS_CD4_TCELL_I                | 177 | 0.263961 | 0.880449 | 0.768585 | 0.883931 | 1 | 3925 tags=34%, list=24%, signal=44% | 0.26001   | 0.875014  | 0.789003   | 0.889065 | 1 | 2972 tags=20%, list=19%, signal=28% |
| STERIOD_BINDING                                | 17  | 0.377261 | 0.880424 | 0.649502 | 0.883571 | 1 | 3029 tags=25%, list=19%, signal=31% | 0.343948  | 1.15888   | 0.134568   | 0.483109 | 1 | 3203 tags=29%, list=20%, signal=36% |
| ENDOPEPTIDASE_ACTIVITY                         | 100 | 0.281937 | 0.880273 | 0.719577 | 0.883529 | 1 | 4505 tags=41%, list=28%, signal=57% | -0.603146 | -1.49463  | 0.0621891  | 0.311608 | 1 | 510 tags=18%, list=3%, signal=18%   |
| GSE3982_EOSINOPHIL_VS_NEUTROPH                 | 171 | 0.265926 | 0.88024  | 0.75153  | 0.883186 | 1 | 2224 tags=16%, list=14%, signal=18% | 0.310966  | 0.99151   | 0.466045   | 0.750807 | 1 | 3848 tags=25%, list=24%, signal=33% |
| GSE7460_CTRL_VS_TGFB_TREATED_A                 | 183 | 0.265034 | 0.879894 | 0.762136 | 0.88366  | 1 | 3400 tags=27%, list=21%, signal=34% | -0.273124 | -1.06279  | 0.226131   | 0.56551  | 1 | 2667 tags=26%, list=17%, signal=31% |
| GSE14769_UNSTIM_VS_40MIN_LPS_I                 | 168 | 0.263739 | 0.8797   | 0.750305 | 0.88375  | 1 | 2549 tags=20%, list=16%, signal=23% | 0.337462  | 1.15157   | 0.171216   | 0.491938 | 1 | 3491 tags=28%, list=23%, signal=36% |
| GSE9988_ANTI_TREMI_VS_VEHICLE                  | 169 | 0.266518 | 0.879211 | 0.761084 | 0.884625 | 1 | 3220 tags=20%, list=20%, signal=25% | -0.262816 | -1.02224  | 0.375      | 0.625522 | 1 | 2913 tags=26%, list=18%, signal=31% |
| INNATE_IMMUNE_RESPONSE                         | 17  | 0.381861 | 0.879158 | 0.640777 | 0.884324 | 1 | 3069 tags=31%, list=19%, signal=38% | 0.303484  | 1.01443   | 0.428571   | 0.722295 | 1 | 3130 tags=33%, list=19%, signal=40% |
| GSE27786_BCELL_VS_NEUTROPHIL_U                 | 177 | 0.264217 | 0.878344 | 0.762022 | 0.886063 | 1 | 2502 tags=29%, list=16%, signal=35% | -0.331768 | -0.826447 | 0.720812   | 0.976272 | 1 | 3547 tags=29%, list=22%, signal=38% |
| GSE17974_2H_VS_72H_UNTREATED_                  | 170 | 0.264382 | 0.877938 | 0.753133 | 0.886729 | 1 | 2591 tags=24%, list=16%, signal=28% | 0.307455  | 1.03524   | 0.377525   | 0.691032 | 1 | 3093 tags=29%, list=19%, signal=36% |
| MEIOTIC_RECOMBINATION                          | 17  | 0.379708 | 0.877783 | 0.655608 | 0.886702 | 1 | 2365 tags=20%, list=15%, signal=23% | -0.258006 | -0.965542 | 0.569231   | 0.735963 | 1 | 2305 tags=27%, list=14%, signal=31% |
| ENDOPEPTIDASE_ACTIVITY                         | 178 | 0.263638 | 0.877343 | 0.753077 | 0.887445 | 1 | 1077 tags=18%, list=7%, signal=19%  | -0.312067 | -0.768308 | 0.811558   | 0.995347 | 1 | 842 tags=18%, list=5%, signal=19%   |
| OUTER_MEMBRANE                                 | 22  | 0.359877 | 0.877325 | 0.651888 | 0.887505 | 1 | 1569 tags=12%, list=10%, signal=14% | 0.309618  | 1.04356   | 0.381272   | 0.677606 | 1 | 2457 tags=20%, list=15%, signal=24% |
| ZINC_ION_BINDING                               | 74  | 0.291402 | 0.876862 | 0.704167 | 0.887907 | 1 | 3469 tags=36%, list=22%, signal=46% | 0.384328  | 0.927274  | 0.589257   | 0.816473 | 1 | 3506 tags=41%, list=22%, signal=52% |
| CELLULAR_BIOSYNTHETIC_PROCESS                  | 296 | 0.252853 | 0.875943 | 0.820596 | 0.889942 | 1 | 3000 tags=20%, list=19%, signal=25% | 0.296192  | 0.89949   | 0.669399   | 0.856388 | 1 | 2047 tags=16%, list=13%, signal=19% |
| GSE10325_CDA_TCELL_VS_MYELOID_                 | 171 | 0.263059 | 0.875523 | 0.779337 | 0.890569 | 1 | 2505 tags=17%, list=16%, signal=20% | -0.29721  | -1.20843  | 0.025      | 0.420948 | 1 | 1893 tags=22%, list=12%, signal=24% |
| AUXILIARY_TRANSPORT_PROTEIN_AC                 | 24  | 0.356815 | 0.875484 | 0.652648 | 0.890228 | 1 | 2509 tags=21%, list=16%, signal=25% | 0.289524  | 0.973722  | 0.526442   | 0.770476 | 1 | 2626 tags=24%, list=16%, signal=28% |
| GSE18148_CBF8_KO_VS_WT_TREG_L                  | 167 | 0.265979 | 0.874881 | 0.758364 | 0.891333 | 1 | 2499 tags=21%, list=16%, signal=25% | 0.443496  | 1.09186   | 0.338633   | 0.578716 | 1 | 4103 tags=25%, list=26%, signal=34% |
| GSE14308_TH2_VS_INDUCED_TREG_I                 | 174 | 0.259663 | 0.873836 | 0.801714 | 0.893572 | 1 | 1299 tags=10%, list=8%, signal=10%  | 0.296305  | 0.993001  | 0.47096    | 0.749798 | 1 | 2890 tags=19%, list=18%, signal=23% |
| ADENYL_RIBONUCLEOTIDE_BINDING                  | 152 | 0.268151 | 0.873284 | 0.784731 | 0.894555 | 1 | 3533 tags=27%, list=22%, signal=34% | 0.324784  | 1.07976   | 0.293532   | 0.602664 | 1 | 3474 tags=32%, list=22%, signal=40% |
| GSE18791_UNSTIM_VS_NEWCASTLE_V                 | 165 | 0.262177 | 0.872751 | 0.770631 | 0.895528 | 1 | 3609 tags=30%, list=22%, signal=38% | -0.302148 | -1.1362   | 0.120536   | 0.467996 | 1 | 1971 tags=24%, list=12%, signal=27% |
| GSE14769_40MIN_VS_360MIN_LPS_I                 | 172 | 0.263715 | 0.872605 | 0.762899 | 0.895474 | 1 | 1913 tags=19%, list=12%, signal=21% | 0.309904  | 1.03242   | 0.396311   | 0.694506 | 1 | 3770 tags=38%, list=23%, signal=49% |
| GSE18791_UNSTIM_VS_NEWCASTLE_V                 | 152 | 0.266747 | 0.872588 | 0.761845 | 0.895081 | 1 | 3067 tags=23%, list=19%, signal=28% | -0.228243 | -0.87323  | 0.893855   | 0.912614 | 1 | 3164 tags=26%, list=20%, signal=32% |
| LYTIC_VACUOLE                                  | 54  | 0.299947 | 0.871704 | 0.687407 | 0.896929 | 1 | 2776 tags=20%, list=17%, signal=24% | 0.322975  | 1.08143   | 0.274585   | 0.601387 | 1 | 4186 tags=36%, list=26%, signal     |

|                                 |     |          |          |          |          |   |                                     |           |           |            |           |       |                                     |
|---------------------------------|-----|----------|----------|----------|----------|---|-------------------------------------|-----------|-----------|------------|-----------|-------|-------------------------------------|
| ECTODERM_DEVELOPMENT            | 68  | 0.292739 | 0.866187 | 0.705964 | 0.901997 | 1 | 4884 tags=28%, list=30%, signal=40% | 0.548339  | 1.64333   | 0.00142045 | 0.0678178 | 0.912 | 3410 tags=19%, list=21%, signal=24% |
| GSE360_T_GONDI_VS_B_MALAYI_HI   | 176 | 0.260548 | 0.865697 | 0.813559 | 0.902803 | 1 | 2919 tags=24%, list=18%, signal=29% | 0.341591  | 1.15122   | 0.144242   | 0.491935  | 1     | 3196 tags=28%, list=20%, signal=35% |
| GSE17721_PAM3CSK4_VS_CPG_2H_B   | 167 | 0.261745 | 0.865453 | 0.806098 | 0.902958 | 1 | 2084 tags=14%, list=13%, signal=16% | 0.286262  | 0.963285  | 0.548628   | 0.773491  | 1     | 3537 tags=25%, list=22%, signal=32% |
| GSE9650_EFFECTOR_VS_MEMORY_CI   | 182 | 0.258978 | 0.865016 | 0.804136 | 0.902637 | 1 | 2988 tags=25%, list=19%, signal=31% | -0.409747 | -1.57723  | 0          | 0.284964  | 0.984 | 2310 tags=36%, list=14%, signal=41% |
| ORGANIC_ACID_METABOLIC_PROCES   | 168 | 0.258976 | 0.864547 | 0.802616 | 0.904411 | 1 | 2594 tags=18%, list=16%, signal=22% | 0.345535  | 1.15624   | 0.151088   | 0.486597  | 1     | 2548 tags=23%, list=16%, signal=27% |
| GSE17974_IL4_AND_ANTI_IL12_VS_U | 139 | 0.262561 | 0.864282 | 0.800253 | 0.904645 | 1 | 1417 tags=10%, list=9%, signal=11%  | 0.356571  | 1.16813   | 0.148909   | 0.467904  | 1     | 3399 tags=25%, list=21%, signal=32% |
| GSE360_L_MAJOR_VS_T_GONDI_MA    | 174 | 0.259393 | 0.86345  | 0.826297 | 0.902629 | 1 | 3109 tags=21%, list=19%, signal=25% | 0.312296  | 1.04334   | 0.364312   | 0.677833  | 1     | 3380 tags=22%, list=21%, signal=27% |
| PURINE_RIBONUCLEOTIDE_BINDING   | 190 | 0.257855 | 0.86344  | 0.781137 | 0.905878 | 1 | 3458 tags=26%, list=22%, signal=33% | -0.270603 | -1.06739  | 0.235955   | 0.554804  | 1     | 1971 tags=22%, list=12%, signal=25% |
| GSE17721_PAM3CSK4_VS_GADIQUIM   | 185 | 0.259339 | 0.863152 | 0.822329 | 0.906161 | 1 | 2783 tags=24%, list=17%, signal=28% | 0.290429  | 0.988293  | 0.150612   | 0.75377   | 1     | 3642 tags=33%, list=23%, signal=42% |
| GSE17974_IL4_AND_ANTI_IL12_VS_U | 144 | 0.265596 | 0.862674 | 0.8      | 0.906887 | 1 | 2990 tags=20%, list=19%, signal=25% | -0.307146 | -1.16389  | 0.0789474  | 0.465574  | 1     | 2349 tags=19%, list=15%, signal=22% |
| GSE13306_TREG_RA_VS_TCONV_RA    | 167 | 0.259678 | 0.861844 | 0.797281 | 0.90855  | 1 | 3666 tags=29%, list=23%, signal=38% | -0.243083 | -0.925206 | 0.176216   | 0.81004   | 1     | 2081 tags=24%, list=18%, signal=29% |
| GSE14350_TREG_VS_TEFF_IN_IL2RB  | 175 | 0.257387 | 0.861537 | 0.808511 | 0.908864 | 1 | 2667 tags=23%, list=17%, signal=28% | -0.334326 | -1.28279  | 0.0165746  | 0.351825  | 1     | 2669 tags=33%, list=17%, signal=39% |
| GSE22886_IGM_MEMORY_BCELL_VS_U  | 177 | 0.255952 | 0.861421 | 0.816425 | 0.90871  | 1 | 2620 tags=20%, list=16%, signal=23% | -0.371423 | -1.42451  | 0          | 0.30231   | 1     | 2555 tags=33%, list=16%, signal=39% |
| ACTIVATION_OF_PROTEIN_KINASE_A  | 25  | 0.343174 | 0.86081  | 0.672868 | 0.909822 | 1 | 4057 tags=40%, list=25%, signal=53% | -0.445929 | -1.23919  | 0.144022   | 0.384299  | 1     | 1301 tags=24%, list=8%, signal=26%  |
| GSE17721_CTRL_VS_LPS_0.5H_BMDM  | 177 | 0.255787 | 0.860657 | 0.839109 | 0.90976  | 1 | 1796 tags=12%, list=11%, signal=14% | 0.304146  | 1.02785   | 0.400718   | 0.700486  | 1     | 3357 tags=26%, list=21%, signal=35% |
| RNA_POLYMERASE_II_TRANSCRIPTIO  | 161 | 0.260751 | 0.860432 | 0.797516 | 0.909881 | 1 | 3374 tags=20%, list=21%, signal=26% | 0.269946  | 0.90432   | 0.704434   | 0.848717  | 1     | 3943 tags=27%, list=25%, signal=32% |
| GSE339_EX_VIVO_VS_IN_CULTURE_C  | 178 | 0.257498 | 0.860019 | 0.813926 | 0.910458 | 1 | 3425 tags=26%, list=21%, signal=33% | 0.300544  | 1.02055   | 0.409653   | 0.709556  | 1     | 2528 tags=23%, list=16%, signal=27% |
| GSE27786_LSK_VS_NKTCCELL_DN     | 175 | 0.257934 | 0.859834 | 0.810615 | 0.91047  | 1 | 3774 tags=27%, list=24%, signal=35% | -0.324896 | -1.25319  | 0.0159574  | 0.370349  | 1     | 2563 tags=30%, list=16%, signal=36% |
| GSE18791_CTRL_VS_NEWCASTLE_XIP  | 174 | 0.257497 | 0.859669 | 0.831039 | 0.910445 | 1 | 3224 tags=25%, list=20%, signal=31% | 0.285585  | 0.963929  | 0.557908   | 0.773915  | 1     | 3186 tags=27%, list=20%, signal=33% |
| GSE7460_CTRL_VS_FOXP3_OVEREXPR  | 177 | 0.25941  | 0.859575 | 0.809988 | 0.910237 | 1 | 3016 tags=23%, list=19%, signal=28% | 0.263512  | 0.888765  | 0.677038   | 0.871434  | 1     | 3235 tags=23%, list=20%, signal=28% |
| GSE17721_0.5H_VS_4H_PAM3CSK4_I  | 174 | 0.259317 | 0.858959 | 0.813869 | 0.912153 | 1 | 2943 tags=24%, list=18%, signal=29% | 0.337293  | 1.13961   | 0.169154   | 0.510835  | 1     | 4091 tags=41%, list=25%, signal=54% |
| AMINO_ACID_AND_DERIVATIVE_MET   | 91  | 0.27561  | 0.85819  | 0.759259 | 0.912716 | 1 | 2594 tags=21%, list=16%, signal=25% | 0.322056  | 1.01013   | 0.144966   | 0.727773  | 1     | 3835 tags=31%, list=24%, signal=40% |
| POSITIVE_REGULATION_OF_TRANSCR  | 136 | 0.264248 | 0.857913 | 0.808696 | 0.912976 | 1 | 3374 tags=29%, list=21%, signal=36% | -0.300976 | -1.11411  | 0.195238   | 0.498412  | 1     | 2154 tags=24%, list=13%, signal=27% |
| PROTEIN_KINASE_ACTIVITY         | 259 | 0.250413 | 0.857905 | 0.823737 | 0.912558 | 1 | 3458 tags=27%, list=22%, signal=33% | -0.28932  | -1.1608   | 0.068323   | 0.463058  | 1     | 1971 tags=21%, list=12%, signal=24% |
| GSE17721_CPG_VS_GARDIQUIMOD_I   | 178 | 0.260316 | 0.857654 | 0.808537 | 0.912703 | 1 | 2648 tags=19%, list=16%, signal=22% | 0.238657  | 0.80266   | 0.918317   | 0.953611  | 1     | 3335 tags=21%, list=21%, signal=27% |
| RECEPTOR_SIGNALING_PROTEIN_ACT  | 74  | 0.284615 | 0.857302 | 0.752407 | 0.913116 | 1 | 2218 tags=23%, list=14%, signal=27% | 0.274733  | 0.849091  | 0.794326   | 0.914421  | 1     | 2180 tags=20%, list=14%, signal=23% |
| GSE9037_CTRL_VS_LPS_4H_STIM_IRA | 181 | 0.256185 | 0.857072 | 0.820452 | 0.913243 | 1 | 2579 tags=20%, list=16%, signal=23% | -0.333251 | -1.2932   | 0.0148515  | 0.344081  | 1     | 2676 tags=29%, list=17%, signal=35% |
| GSE27786_LIN_NEG_VS_CD4_TCELL_I | 173 | 0.257221 | 0.857053 | 0.809002 | 0.912865 | 1 | 3156 tags=21%, list=20%, signal=26% | -0.276267 | -1.05938  | 0.235294   | 0.574807  | 1     | 2782 tags=28%, list=17%, signal=33% |
| ENVELOPE                        | 152 | 0.258909 | 0.856828 | 0.78625  | 0.912974 | 1 | 3277 tags=25%, list=20%, signal=31% | 0.402848  | 1.34512   | 0.0178117  | 0.246696  | 1     | 3297 tags=34%, list=21%, signal=42% |
| NUCLEOTIDE_BINDING              | 209 | 0.255333 | 0.856685 | 0.843387 | 0.912897 | 1 | 3458 tags=26%, list=22%, signal=33% | 0.256014  | 0.878997  | 0.77027    | 0.882983  | 1     | 3505 tags=30%, list=22%, signal=38% |
| TRANSCRIPTION_COACTIVATOR_ACTI  | 112 | 0.269136 | 0.856529 | 0.74934  | 0.912838 | 1 | 2138 tags=15%, list=13%, signal=17% | -0.293066 | -1.05667  | 0.315789   | 0.577459  | 1     | 3021 tags=27%, list=19%, signal=33% |
| HEART_DEVELOPMENT               | 34  | 0.323776 | 0.85572  | 0.709231 | 0.914236 | 1 | 1144 tags=9%, list=7%, signal=9%    | 0.311478  | 0.835134  | 0.159236   | 0.919688  | 1     | 3097 tags=21%, list=19%, signal=25% |
| AMINO_ACID_TRANSPORT            | 26  | 0.342738 | 0.855655 | 0.701538 | 0.914005 | 1 | 2634 tags=19%, list=16%, signal=23% | 0.278862  | 0.69864   | 0.932177   | 0.994493  | 1     | 3813 tags=31%, list=24%, signal=40% |
| GSE17721_LPS_VS_POLYIC_8H_BMDM  | 183 | 0.258632 | 0.855582 | 0.820503 | 0.913802 | 1 | 2189 tags=17%, list=14%, signal=20% | 0.269302  | 0.91508   | 0.855758   | 0.832654  | 1     | 3000 tags=26%, list=19%, signal=31% |
| GSE17721_POLYIC_VS_PAM3CSK4_I2  | 180 | 0.258659 | 0.85523  | 0.833953 | 0.9142   | 1 | 2687 tags=21%, list=17%, signal=25% | 0.305878  | 1.03949   | 0.379699   | 0.68296   | 1     | 2864 tags=28%, list=18%, signal=34% |
| EXTRACELLULAR_LIGAND_GATED_I0   | 21  | 0.358664 | 0.855175 | 0.683043 | 0.913881 | 1 | 4049 tags=19%, list=25%, signal=25% | 0.292265  | 0.708411  | 0.877049   | 0.994747  | 1     | 181 tags=5%, list=1%, signal=5%     |
| GSE6269_STREP_AUREUS_VS_STREP_  | 153 | 0.259508 | 0.854957 | 0.809642 | 0.913965 | 1 | 3598 tags=28%, list=22%, signal=36% | 0.333748  | 1.11752   | 0.215124   | 0.542024  | 1     | 3251 tags=27%, list=20%, signal=34% |
| GSE24634_IL4_VS_CTRL_TREATED_N  | 181 | 0.25978  | 0.854497 | 0.817618 | 0.914667 | 1 | 3372 tags=28%, list=21%, signal=35% | 0.313119  | 1.06447   | 0.303594   | 0.635521  | 1     | 2878 tags=27%, list=18%, signal=33% |
| GSE10463_CD40L_AND_VA347_VS_C   | 134 | 0.262757 | 0.854457 | 0.803504 | 0.914631 | 1 | 1783 tags=10%, list=11%, signal=11% | 0.293475  | 0.965668  | 0.535576   | 0.774182  | 1     | 4493 tags=30%, list=28%, signal=40% |
| GSE5960_TH1_VS_ANGERIC_TH1_UP   | 180 | 0.255666 | 0.854445 | 0.82704  | 0.91393  | 1 | 3679 tags=27%, list=23%, signal=35% | 0.234181  | 0.790918  | 0.944931   | 0.963753  | 1     | 3172 tags=22%, list=20%, signal=27% |
| GSE17721_CTRL_VS_GARDIQUIMOD_   | 181 | 0.256907 | 0.85416  | 0.803946 | 0.914205 | 1 | 3034 tags=20%, list=19%, signal=25% | 0.301776  | 1.02028   | 0.432298   | 0.708299  | 1     | 3196 tags=22%, list=22%, signal=41% |
| LYSOSOME                        | 54  | 0.299947 | 0.854034 | 0.741848 | 0.914065 | 1 | 4571 tags=44%, list=28%, signal=62% | 0.528984  | 1.53819   | 0.0089153  | 0.109548  | 1     | 3118 tags=41%, list=19%, signal=50% |
| GSE13485_DAY1_VS_DAY3_YF17D_V   | 171 | 0.257738 | 0.852926 | 0.816936 | 0.916304 | 1 | 3857 tags=34%, list=24%, signal=44% | -0.280592 | -1.0913   | 0.169676   | 0.532907  | 1     | 3042 tags=33%, list=19%, signal=40% |
| GSE29618_PRE_VS_DAY7_POST_TIV_  | 167 | 0.258885 | 0.852103 | 0.819632 | 0.915905 | 1 | 2246 tags=14%, list=14%, signal=17% | 0.311897  | 1.05179   | 0.339088   | 0.659461  | 1     | 4259 tags=32%, list=27%, signal=43% |
| RESPONSE_TO_OXIDATIVE_STRESS    | 41  | 0.315026 | 0.852807 | 0.74175  | 0.915723 | 1 | 3064 tags=24%, list=19%, signal=30% | 0.260234  | 0.721005  | 0.932442   | 0.991752  | 1     | 3549 tags=29%, list=22%, signal=37% |
| GSE6269_FLU_VS_E_COV_INF_PBMC   | 145 | 0.26124  | 0.852753 | 0.812655 | 0.915418 | 1 | 4305 tags=39%, list=27%, signal=52% | 0.351409  | 1.1675    | 0.139386   | 0.46826   | 1     | 3341 tags=34%, list=21%, signal=43% |
| GSE24634_TREG_VS_TCONV_POST_D   | 187 | 0.254545 | 0.851978 | 0.85782  | 0.916808 | 1 | 3509 tags=28%, list=22%, signal=36% | 0.475957  | 1.61476   | 0          | 0.0673161 | 0.976 | 3238 tags=41%, list=20%, signal=50% |
| GSE14308_UNINDUCED_VS_NATURAL_T | 179 | 0.254365 | 0.851492 | 0.815256 | 0.917533 | 1 | 3426 tags=23%, list=21%, signal=29% | 0.331935  | 1.12188   | 0.215442   | 0.534415  | 1     | 2928 tags=25%, list=18%, signal=30% |
| PROTEIN_SERINE_THREONINE_KINAS  | 185 | 0.256795 | 0.851136 | 0.841478 | 0.917962 | 1 | 3738 tags=30%, list=23%, signal=38% | -0.296771 | -1.12702  | 0.112299   | 0.482975  | 1     | 1971 tags=25%, list=12%, signal=28% |
| NUCLEAR_CHROMOSOME_PART         | 31  | 0.324379 | 0.850325 | 0.722309 | 0.919446 | 1 | 4056 tags=39%, list=25%, signal=52% | 0.398533  | 1.04597   | 0.392801   | 0.672913  | 1     | 2666 tags=25%, list=17%, signal=42% |
| GSE29618_PRE_VS_DAY7_POST_TIV_  | 163 | 0.257185 | 0.850202 | 0.83867  | 0.919304 | 1 | 3940 tags=23%, list=25%, signal=30% | 0.350098  | 1.1703    | 0.121951   | 0.46521   | 1     | 4031 tags=28%, list=25%, signal=36% |
| GSE36392_TYPE_2_MYELOID_VS_E0   | 175 | 0.258235 | 0.850167 | 0.81477  | 0.91895  | 1 | 2452 tags=21%, list=15%, signal=25% | 0.28997   | 0.973804  | 0.535881   | 0.770711  | 1     | 2884 tags=24%, list=18%, signal=29% |
| GSE22886_UNSTIM_VS_IL15_STIM_N  | 157 | 0.257841 | 0.849882 | 0.807789 | 0.919187 | 1 | 3393 tags=23%, list=21%, signal=29% | 0.27333   | 0.910834  | 0.682161   | 0.840388  | 1     | 1700 tags=15%, list=11%, signal=17% |
| GSE29618_PRE_VS_DAY7_FLU_VACCI  | 170 | 0.255803 | 0.84946  | 0.823245 | 0.919734 | 1 | 3260 tags=21%, list=20%, signal=26% | 0.370567  | 1.24334   | 0.0633374  | 0.369306  | 1     | 2392 tags=19%, list=15%, signal=23% |
| GSE5463_CTRL_VS_DEXAMETHASONH   | 183 | 0.255632 | 0.849287 | 0.832328 | 0.919719 | 1 | 3883 tags=32%, list=24%, signal=42% | 0.30984   | 1.04967   | 0.341523   | 0.664021  | 1     | 2936 tags=28%, list=18%, signal=34% |
| GSE28237_FOLLICULAR_VS_LATE_GC  | 171 | 0.256715 | 0.849084 | 0.843284 | 0.919747 | 1 | 4294 tags=32%, list=27%, signal=43% | -0.287784 | -1.10552  | 0.163265   | 0.518344  | 1     | 3118 tags=27%, list=19%, signal=33% |
| PROTEIN_C_TERMINUS_BINDING      | 70  | 0.283022 | 0.848322 | 0.767507 | 0.921129 | 1 | 3610 tags=30%, list=22%, signal=39% | 0.315419  | 0.94736   | 0.561354   | 0.791977  | 1     | 3418 tags=31%, list=21%, signal=40% |
| ORGANELLE_ENVELOPE              | 152 | 0.258909 | 0.848204 | 0.8132   | 0.920998 | 1 | 3277 tags=25%, list=20%, signal=31% | 0.402848  | 1.33588   | 0.0266497  | 0.255424  | 1     | 3297 tags=34%, list=21%, signal=42% |
| GLUTAMATE_RECEPTOR_ACTIVITY     | 16  | 0.374455 | 0.848055 | 0.691928 | 0.92091  | 1 | 5745 tags=31%, list=36%, signal=49% | 0.247126  | 0.571668  | 0.986755   | 0.999776  | 1     | 3659 tags=33%, list=23%, signal=46% |
| GSE29618_PRE_VS_DAY7_POST_TIV_  | 168 | 0.255463 | 0.847905 | 0.837871 | 0.920828 | 1 | 1615 tags=9%, list=10%, signal=10%  | 0.317212  | 1.05981   | 0.328626   | 0.643505  | 1     | 3773 tags=20%, list=24%, signal=26% |
| SYMPORTER_ACTIVITY              | 28  | 0.329083 | 0.847716 | 0.711214 | 0.920826 | 1 | 3068 tags=25%, list=19%, signal=31% | 0.293511  | 0.765808  | 0.886125   | 0.974338  | 1     | 2693 tags=18%, list=17%, signal=21% |
| GSE27786_LIN_NEG_VS_CD8_TCELL_I | 177 | 0.254364 | 0.847467 | 0.841004 | 0.920981 | 1 | 2740 tags=21%, list=17%, signal=25% | -0.30381  | -1.17119  | 0.121212   | 0.4517    | 1     | 2648 tags=29%, list=16%, signal=35% |
| GSE14308_TH2_VS_TH1_DN          | 177 | 0.255011 | 0.847379 | 0.846252 | 0.920748 | 1 | 2610 tags=21%, list=16%, signal=25% | 0.278849  | 0.94101   | 0.617756   | 0.798974  | 1     | 1707 tags=19%, list=11%, signal=21% |
| GSE17721_LPS_VS_CPG_12H_BMDM    | 179 | 0.253785 | 0.847334 | 0.852417 | 0.920428 | 1 | 3131 tags=24%, list=20%, signal=30% | 0.259767  | 0.87851   | 0.677503   | 0.883789  | 1     | 2325 tags=18%, list=14%, signal=21% |
| GSE17974_OH_VS_3H_IN_VITRO_ACT  | 152 |          |          |          |          |   |                                     |           |           |            |           |       |                                     |

|                                 |     |          |          |          |          |                                     |                                     |           |           |           |   |                                     |
|---------------------------------|-----|----------|----------|----------|----------|-------------------------------------|-------------------------------------|-----------|-----------|-----------|---|-------------------------------------|
| TRANSLATION_INITIATION_FACTOR_L | 23  | 0.347015 | 0.843633 | 0.9216   | 1        | 4768 tags=39%, list=30%, signal=56% | -0.256181                           | -0.681801 | 0.953079  | 0.990135  | 1 | 2693 tags=26%, list=17%, signal=31% |
| GSE20715_OH_VS_48H_OZONE_LUNC   | 181 | 0.253004 | 0.843527 | 0.85006  | 0.921396 | 1                                   | 2901 tags=25%, list=18%, signal=30% | 0.295459  | 0.992553  | 0.749814  | 1 | 3053 tags=27%, list=19%, signal=32% |
| SENSORY_PERCEPTION              | 168 | 0.255124 | 0.843192 | 0.846433 | 0.921714 | 1                                   | 3344 tags=17%, list=21%, signal=22% | -0.23394  | -0.895385 | 0.825472  | 1 | 3686 tags=20%, list=23%, signal=27% |
| GSE31082_DP_VS_CD8_SP_THYMOC    | 169 | 0.255124 | 0.84301  | 0.828183 | 0.921691 | 1                                   | 3424 tags=26%, list=21%, signal=33% | -0.297073 | -1.13786  | 0.104712  | 1 | 1698 tags=20%, list=11%, signal=22% |
| GSE16755_CTRL_VS_IFNA_TREATED_I | 165 | 0.255752 | 0.842761 | 0.830049 | 0.921837 | 1                                   | 3181 tags=27%, list=20%, signal=34% | 0.318849  | 1.07161   | 0.298507  | 1 | 621474                              |
| GSE27786_NKTCCELL_VS_NEUTROPHIL | 175 | 0.254156 | 0.841861 | 0.861423 | 0.923476 | 1                                   | 3233 tags=26%, list=20%, signal=32% | 0.283135  | 0.962697  | 0.545925  | 1 | 0.772977                            |
| TRANSFERASE_ACTIVITY_TRANSFERRI | 35  | 0.321578 | 0.84131  | 0.710102 | 0.924266 | 1                                   | 3551 tags=34%, list=22%, signal=44% | 0.293255  | 0.780953  | 0.968793  | 1 | 1984 tags=20%, list=12%, signal=23% |
| GSE17721_CTRL_VS_POLYVIC_2H_BMI | 172 | 0.255079 | 0.840746 | 0.849633 | 0.9251   | 1                                   | 2045 tags=16%, list=13%, signal=18% | 0.293531  | 0.99072   | 0.495575  | 1 | 0.749382                            |
| GSE9650_NAIVE_VS_MEMORY_CD8_I   | 182 | 0.251773 | 0.840652 | 0.860494 | 0.924884 | 1                                   | 3132 tags=27%, list=20%, signal=33% | -0.280601 | -0.18173  | 0.19598   | 1 | 0.541272                            |
| GSE3982_MAST_CELL_VS_NEUTROPH   | 176 | 0.253674 | 0.840269 | 0.854067 | 0.925324 | 1                                   | 3870 tags=30%, list=24%, signal=39% | -0.247387 | -0.950273 | 0.611429  | 1 | 0.765901                            |
| ADENYL_NUCLEOTIDE_BINDING       | 158 | 0.254529 | 0.840063 | 0.82801  | 0.925549 | 1                                   | 3609 tags=29%, list=22%, signal=37% | -0.303372 | -1.15632  | 0.0591398 | 1 | 0.459434                            |
| CYTOKINE_AND_CHEMOKINE_MEDIA    | 17  | 0.371012 | 0.839815 | 0.688207 | 0.925486 | 1                                   | 2934 tags=35%, list=18%, signal=43% | 0.379974  | 0.88127   | 0.6288    | 1 | 0.879861                            |
| AROMATIC_COMPOUND_METABOLIC     | 22  | 0.345579 | 0.839735 | 0.6944   | 0.925236 | 1                                   | 3676 tags=45%, list=23%, signal=59% | -0.425222 | -1.08917  | 0.310249  | 1 | 0.534529                            |
| GSE22886_IGG_IGA_MEMORY_BCELL   | 178 | 0.252352 | 0.839358 | 0.858017 | 0.925642 | 1                                   | 4010 tags=34%, list=25%, signal=45% | -0.357692 | -1.36769  | 0.0111732 | 1 | 0.314319                            |
| GSE17721_CTRL_VS_CPG_24H_BMDM   | 180 | 0.252004 | 0.838996 | 0.857491 | 0.926018 | 1                                   | 3172 tags=22%, list=20%, signal=27% | 0.304529  | 1.03647   | 0.362757  | 1 | 0.688615                            |
| GSE14026_TH1_VS_TH17_UP         | 170 | 0.253157 | 0.838705 | 0.854015 | 0.926371 | 1                                   | 3180 tags=19%, list=20%, signal=24% | 0.274973  | 0.917099  | 0.687186  | 1 | 0.833414                            |
| GSE31082_DP_VS_CD4_SP_THYMOC    | 170 | 0.255067 | 0.838458 | 0.856429 | 0.926367 | 1                                   | 3621 tags=29%, list=23%, signal=38% | -0.258034 | -0.971522 | 0.532528  | 1 | 0.719094                            |
| GSE26669_CD4_VS_CD8_TCELL_IN_IV | 174 | 0.251556 | 0.837745 | 0.865155 | 0.927495 | 1                                   | 3044 tags=23%, list=19%, signal=28% | 0.324621  | 1.09133   | 0.249694  | 1 | 0.580108                            |
| CARBOHYDRATE_BIOSYNTHETIC_PRO   | 46  | 0.29987  | 0.837401 | 0.771429 | 0.928628 | 1                                   | 3458 tags=28%, list=22%, signal=36% | 0.341643  | 0.972879  | 0.505731  | 1 | 0.771825                            |
| GSE29614_CTRL_VS_DAY3_TIV_FLU_I | 125 | 0.26012  | 0.836892 | 0.840967 | 0.928539 | 1                                   | 2052 tags=10%, list=13%, signal=11% | 0.373224  | 1.21801   | 0.105978  | 1 | 0.407307                            |
| GSE11924_TFH_VS_TH17_CD4_TCELL  | 177 | 0.25223  | 0.836705 | 0.852078 | 0.928555 | 1                                   | 2297 tags=17%, list=14%, signal=20% | 0.288709  | 0.985129  | 0.499379  | 1 | 0.750712                            |
| NEGATIVE_REGULATION_OF_NUCLEO   | 188 | 0.25082  | 0.836414 | 0.862745 | 0.928729 | 1                                   | 2838 tags=21%, list=18%, signal=25% | 0.302139  | 1.02338   | 0.417476  | 1 | 0.704487                            |
| GSE32423_CTRL_VS_IL4_MEMORY_CI  | 171 | 0.252413 | 0.83633  | 0.853234 | 0.928493 | 1                                   | 3408 tags=25%, list=21%, signal=32% | 0.387688  | 1.31857   | 0.0335821 | 1 | 0.269744                            |
| GSE17721_12H_VS_24H_PAM3CSK4_I  | 174 | 0.252174 | 0.835957 | 0.873918 | 0.928868 | 1                                   | 2631 tags=21%, list=16%, signal=24% | 0.267362  | 0.898443  | 0.720643  | 1 | 0.857887                            |
| GSE14308_NAIVE_CD4_TCELL_VS_INT | 179 | 0.251697 | 0.835911 | 0.8753   | 0.928541 | 1                                   | 2695 tags=21%, list=17%, signal=25% | 0.282216  | 0.950441  | 0.808046  | 1 | 0.786499                            |
| MEIOSIS_I                       | 18  | 0.35924  | 0.835662 | 0.6976   | 0.928628 | 1                                   | 1077 tags=17%, list=7%, signal=18%  | 0.323354  | 0.758303  | 0.83871   | 1 | 0.979569                            |
| PATTERN_SPECIFICATION_PROCESS   | 30  | 0.327524 | 0.835364 | 0.708207 | 0.928841 | 1                                   | 3422 tags=23%, list=21%, signal=30% | 0.29875   | 0.766661  | 0.803189  | 1 | 0.973967                            |
| MICROTUBULE_ORGANIZING_CENTEF   | 15  | 0.374213 | 0.835357 | 0.703259 | 0.92843  | 1                                   | 170 tags=13%, list=1%, signal=13%   | 0.432633  | 0.979759  | 0.488333  | 1 | 0.763246                            |
| GSE17721_ALL_VS_24H_PAM3CSK4_I  | 172 | 0.24991  | 0.834764 | 0.848781 | 0.929313 | 1                                   | 3315 tags=27%, list=21%, signal=33% | 0.332076  | 1.11801   | 0.215422  | 1 | 0.541273                            |
| GSE1460_DP_THYMOCYTE_VS_NAIVE   | 172 | 0.251519 | 0.83455  | 0.875769 | 0.929357 | 1                                   | 3970 tags=26%, list=25%, signal=34% | 0.259526  | 0.878089  | 0.796203  | 1 | 0.884397                            |
| GSE29615_CTRL_VS_DAY7_LAIU_FLU  | 128 | 0.260318 | 0.833894 | 0.844444 | 0.930294 | 1                                   | 2884 tags=16%, list=18%, signal=20% | 0.271078  | 0.880673  | 0.752972  | 1 | 0.880479                            |
| VACUOLE                         | 61  | 0.285273 | 0.833886 | 0.779167 | 0.929886 | 1                                   | 4571 tags=43%, list=28%, signal=59% | 0.489227  | 1.45356   | 0.0262411 | 1 | 0.149553                            |
| GSE1460_CD4_THYMOCYTE_VS_NAIV   | 161 | 0.253552 | 0.833666 | 0.859951 | 0.929899 | 1                                   | 3814 tags=27%, list=24%, signal=35% | 0.287287  | 0.963197  | 0.54798   | 1 | 0.773296                            |
| GSE17721_CTRL_VS_PAM3CSK4_1H_I  | 183 | 0.248701 | 0.833484 | 0.886473 | 0.929872 | 1                                   | 3773 tags=25%, list=24%, signal=32% | -0.246629 | -0.949938 | 0.671875  | 1 | 0.764645                            |
| PURINE_NUCLEOTIDE_BINDING       | 196 | 0.247701 | 0.83341  | 0.888807 | 0.929629 | 1                                   | 3458 tags=26%, list=22%, signal=33% | -0.272043 | -1.04811  | 0.307263  | 1 | 0.589729                            |
| GSE37416_OH_VS_24H_FTALARENSI   | 169 | 0.251555 | 0.833317 | 0.858374 | 0.929396 | 1                                   | 3341 tags=27%, list=21%, signal=34% | -0.317771 | -1.21833  | 0.0283019 | 1 | 0.460783                            |
| INTEGRIN_COMPLEX                | 18  | 0.361601 | 0.832276 | 0.737374 | 0.931221 | 1                                   | 2684 tags=33%, list=17%, signal=40% | 0.58701   | 1.34947   | 0.092233  | 1 | 0.240469                            |
| GSE17721_0.5H_VS_8H_POLYVIC_BMC | 182 | 0.249296 | 0.832018 | 0.876663 | 0.931301 | 1                                   | 2289 tags=15%, list=14%, signal=17% | 0.295044  | 1.00009   | 0.472888  | 1 | 0.740766                            |
| GOLGI_VESICLE_TRANSPORT         | 47  | 0.295859 | 0.831755 | 0.788872 | 0.931437 | 1                                   | 2369 tags=23%, list=15%, signal=27% | 0.345798  | 0.979166  | 0.473134  | 1 | 0.763791                            |
| GSE39820_TGFBETA3_IL6_VS_TGFB   | 177 | 0.251064 | 0.831291 | 0.874704 | 0.932005 | 1                                   | 1922 tags=12%, list=12%, signal=14% | 0.331473  | 1.11556   | 0.229448  | 1 | 0.542799                            |
| EXTRACELLULAR_REGION_PART       | 290 | 0.238125 | 0.830331 | 0.915813 | 0.933596 | 1                                   | 2187 tags=10%, list=14%, signal=12% | 0.250648  | 0.880836  | 0.807078  | 1 | 0.880506                            |
| GLYCOSAMINOGLYCAN_BINDING       | 30  | 0.326665 | 0.829871 | 0.733333 | 0.934128 | 1                                   | 1019 tags=13%, list=6%, signal=14%  | -0.367872 | -1.0434   | 0.376045  | 1 | 0.594642                            |
| GSE14769_UNSTIM_VS_20MIN_LPS_I  | 180 | 0.249203 | 0.829603 | 0.876351 | 0.934246 | 1                                   | 3218 tags=25%, list=20%, signal=31% | 0.249724  | 0.844283  | 0.854015  | 1 | 0.912027                            |
| GSE29617_CTRL_VS_DAY3_TIV_FLU_I | 174 | 0.250625 | 0.829499 | 0.858537 | 0.934041 | 1                                   | 3553 tags=25%, list=22%, signal=32% | -0.257361 | -0.97957  | 0.508571  | 1 | 0.701153                            |
| GSE1460_DP_THYMOCYTE_VS_THYM    | 162 | 0.255129 | 0.829163 | 0.876999 | 0.934326 | 1                                   | 2051 tags=17%, list=13%, signal=20% | -0.2734   | -1.04041  | 0.338624  | 1 | 0.603114                            |
| GSE6566_STRONG_VS_WEAK_DC_STI   | 153 | 0.253131 | 0.828919 | 0.88     | 0.934425 | 1                                   | 2699 tags=22%, list=17%, signal=26% | 0.338341  | 1.12519   | 0.204056  | 1 | 0.536304                            |
| GSE10325_BCELL_VS_MYELOID_UP    | 160 | 0.251015 | 0.828897 | 0.863861 | 0.934043 | 1                                   | 2472 tags=21%, list=15%, signal=25% | 0.389849  | 1.30984   | 0.0332512 | 1 | 0.274865                            |
| GSE15990_STIM_VS_STIM_AND_TRIC  | 179 | 0.250522 | 0.828889 | 0.857494 | 0.933741 | 1                                   | 3945 tags=35%, list=25%, signal=45% | 0.363369  | 1.22879   | 0.062582  | 1 | 0.386799                            |
| GSE15659_CD45RA_NEG_CD4_TCELL   | 150 | 0.255818 | 0.828819 | 0.864259 | 0.933558 | 1                                   | 3006 tags=18%, list=19%, signal=23% | 0.234005  | 0.774497  | 0.96534   | 1 | 0.972381                            |
| TRANSFERASE_ACTIVITY_TRANSFERRI | 45  | 0.299211 | 0.828498 | 0.757143 | 0.933618 | 1                                   | 3301 tags=27%, list=21%, signal=33% | 0.245857  | 0.688095  | 0.955752  | 1 | 0.994428                            |
| GSE15930_STIM_VS_STIM_AND_IFNA  | 170 | 0.250408 | 0.828422 | 0.869347 | 0.933348 | 1                                   | 3379 tags=21%, list=21%, signal=27% | 0.324798  | 1.09088   | 0.271062  | 1 | 0.581261                            |
| GSE14308_TH2_VS_NATURAL_TREG_I  | 174 | 0.249479 | 0.827636 | 0.889435 | 0.93456  | 1                                   | 2675 tags=21%, list=17%, signal=25% | -0.292631 | -1.12549  | 0.125604  | 1 | 0.484992                            |
| GSE3982_CTRL_VS_IGE_STIM_MAST_I | 168 | 0.253791 | 0.827355 | 0.868516 | 0.934677 | 1                                   | 3376 tags=26%, list=21%, signal=32% | -0.315203 | -1.20142  | 0.038835  | 1 | 0.428035                            |
| EMBRYONIC_MORPHOGENESIS         | 15  | 0.374274 | 0.826528 | 0.724876 | 0.93601  | 1                                   | 2502 tags=20%, list=16%, signal=24% | 0.620703  | 1.38041   | 0.0883797 | 1 | 0.205403                            |
| KINASE_INHIBITOR_ACTIVITY       | 23  | 0.339138 | 0.826354 | 0.752524 | 0.935941 | 1                                   | 1781 tags=22%, list=11%, signal=24% | 0.357601  | 0.892649  | 0.611382  | 1 | 0.866363                            |
| GSE3982_DC_VS_NEUTROPHIL_UP     | 177 | 0.248279 | 0.826328 | 0.89312  | 0.935669 | 1                                   | 2456 tags=19%, list=15%, signal=22% | 0.332483  | 1.12041   | 0.1925    | 1 | 0.535261                            |
| GSE3982_NEUTROPHIL_VS_TH1_UP    | 167 | 0.248592 | 0.825913 | 0.885468 | 0.935964 | 1                                   | 3632 tags=25%, list=23%, signal=32% | 0.314825  | 1.06023   | 0.335006  | 1 | 0.643655                            |
| GSE14000_TRANSLATED_RNA_VS_MF   | 184 | 0.246917 | 0.825008 | 0.89033  | 0.937345 | 1                                   | 3754 tags=29%, list=23%, signal=38% | 0.285716  | 0.966163  | 0.551899  | 1 | 0.775047                            |
| GSE17721_POLYVIC_VS_PAM3CSK4_8F | 180 | 0.247927 | 0.823797 | 0.892157 | 0.939307 | 1                                   | 2084 tags=17%, list=13%, signal=19% | 0.257834  | 0.883563  | 0.862769  | 1 | 0.876076                            |
| GSE10239_KLRG1INT_VS_KLRG1HIGH  | 173 | 0.247475 | 0.823519 | 0.886169 | 0.939445 | 1                                   | 1979 tags=13%, list=12%, signal=15% | 0.326264  | 1.09488   | 0.259804  | 1 | 0.573488                            |
| GSE15659_CD45RA_NEG_CD4_TCELL   | 156 | 0.250647 | 0.82351  | 0.875467 | 0.939036 | 1                                   | 2902 tags=17%, list=18%, signal=21% | -0.297742 | -1.12143  | 0.145374  | 1 | 0.489382                            |
| GSE11924_TFH_VS_TH2_CD4_TCELL   | 178 | 0.245905 | 0.823224 | 0.890274 | 0.939163 | 1                                   | 3076 tags=28%, list=19%, signal=34% | 0.251239  | 0.846601  | 0.856608  | 1 | 0.913084                            |
| GSE17721_CTRL_VS_PAM3CSK4_1H_I  | 174 | 0.245625 | 0.822659 | 0.892421 | 0.939883 | 1                                   | 2945 tags=27%, list=18%, signal=33% | 0.335542  | 1.13137   | 0.191067  | 1 | 0.523186                            |
| GSE11924_TFH_VS_TH17_CD4_TCELL  | 172 | 0.247589 | 0.822423 | 0.918719 | 0.939921 | 1                                   | 3202 tags=27%, list=20%, signal=34% | 0.231188  | 0.789063  | 0.966205  | 1 | 0.965477                            |
| GSE29615_CTRL_VS_LAIU_FLU_VACCI | 123 | 0.254796 | 0.82146  | 0.877081 | 0.941374 | 1                                   | 4404 tags=30%, list=27%, signal=41% | 0.255209  | 0.839764  | 0.856397  | 1 | 0.914679                            |
| GSE3982_EOSINOPHIL_VS_CENT_MEI  | 179 | 0.247738 | 0.821046 | 0.896088 | 0.941804 | 1                                   | 3550 tags=26%, list=22%, signal=33% | 0.247302  | 0.840053  | 0.862769  | 1 | 0.915423                            |
| GSE17721_POLYVIC_VS_GARDIQUIMOI | 174 | 0.246578 | 0.820556 | 0.902469 | 0.942294 | 1                                   | 3165 tags=23%, list=20%, signal=28% | 0.227978  | 0.77042   | 0.97628   | 1 | 0.974617                            |
| GSE15930_STIM_VS_STIM_AND_IL_I  | 174 | 0.247324 | 0.820052 | 0.896509 | 0.942914 | 1                                   | 2720 tags=17%, list=17%, signal=21% | 0.307861  | 1.03816   | 0.366748  | 1 | 0.684466                            |
| GSE3982_CTRL_VS_TGFBETA3_IL6_C  | 181 | 0.247407 | 0.819648 | 0.892601 | 0.943217 | 1                                   | 3404 tags=27%, list=21%, signal=33% | 0.333728  | 1.13047   | 0.183063  | 1 | 0.522296                            |
| SINGLE_STRANDED_DNA_BINDING     | 31  | 0.317633 | 0.819387 | 0.764885 | 0.943277 | 1                                   | 3474 tags=35%, list=22%, signal=45% | -0.324146 | -0.950189 | 0.545946  | 1 | 0.764923                            |
| GSE7460_FOXP3_MUT_VS_WT_ACT_I   | 169 | 0.248669 | 0.819041 | 0.872976 | 0.94354  | 1                                   | 1939 tags=14%, list=12%, signal=16% | -0.25273  | -0.97534  | 0.507317  | 1 | 0.709001                            |
| GSE24142_DN2_VS_DN3_THYMOCYT    | 180 | 0.246822 | 0.818469 | 0.906137 | 0.944212 | 1                                   | 1940 tags=16%, list=12%, signal=17% | -0.305894 | -1.18056  | 0.0483092 | 1 | 0.447898                            |
| VOLTAGE_GATED_POTASSIUM_CHAN    | 35  | 0.309872 |          |          |          |                                     |                                     |           |           |           |   |                                     |



Supplementary Table 3. Gene enrichment statistics for HD and control monkeys.

30

|                                 |     |          |          |          |          |   |                                     |           |           |           |           |       |                                     |
|---------------------------------|-----|----------|----------|----------|----------|---|-------------------------------------|-----------|-----------|-----------|-----------|-------|-------------------------------------|
| GSE3982_MAC_VS_NEUTROPHIL_DN    | 174 | 0.235187 | 0.776522 | 0.952147 | 0.973414 | 1 | 3043 tags=22%, list=19%, signal=27% | 0.240453  | 0.805953  | 0.921642  | 0.950918  | 1     | 4138 tags=28%, list=26%, signal=37% |
| EPIDERMIS_DEVELOPMENT           | 61  | 0.267251 | 0.77564  | 0.970448 | 0.974048 | 1 | 4299 tags=21%, list=27%, signal=29% | 0.609418  | 1.80353   | 0         | 0.0119167 | 0.188 | 1956 tags=15%, list=12%, signal=17% |
| GSE13229_IMM_VS_INTMATURE_NK    | 175 | 0.232256 | 0.77541  | 0.960337 | 0.973928 | 1 | 3528 tags=27%, list=22%, signal=35% | 0.248308  | 0.832809  | 0.884328  | 0.923175  | 1     | 3008 tags=24%, list=19%, signal=29% |
| GSE17580_UNINFECTED_VS_S_MANS   | 181 | 0.233533 | 0.775366 | 0.950704 | 0.973559 | 1 | 3418 tags=28%, list=21%, signal=35% | -0.272521 | -1.05502  | 0.264151  | 0.578684  | 1     | 2845 tags=27%, list=18%, signal=33% |
| GSE17721_LPS_VS_CPG_0.5H_BMDM   | 176 | 0.233038 | 0.775068 | 0.958435 | 0.973499 | 1 | 3074 tags=24%, list=19%, signal=29% | -0.294976 | -1.1252   | 0.130435  | 0.484295  | 1     | 3432 tags=34%, list=21%, signal=42% |
| GSE20366_TREG_VS_TCONV_UP       | 178 | 0.235101 | 0.774802 | 0.954933 | 0.9734   | 1 | 3391 tags=22%, list=21%, signal=27% | 0.250018  | 0.848936  | 0.826355  | 0.910229  | 1     | 2353 tags=16%, list=15%, signal=25% |
| GSE11864_UNTREATED_VS_CSF1_IFN  | 167 | 0.234175 | 0.774268 | 0.957576 | 0.973635 | 1 | 2654 tags=20%, list=17%, signal=24% | 0.335681  | 1.12681   | 0.216749  | 0.533801  | 1     | 2508 tags=22%, list=14%, signal=19% |
| GSE22886_NAIVE_CD4_TCELL_VS_12I | 167 | 0.233752 | 0.773804 | 0.957627 | 0.973781 | 1 | 3050 tags=21%, list=19%, signal=26% | -0.334043 | -1.27666  | 0.0197044 | 0.355917  | 1     | 2156 tags=29%, list=13%, signal=34% |
| GSE17721_0.5H_VS_8H_POLYIC_BMC  | 178 | 0.232353 | 0.773035 | 0.957524 | 0.974286 | 1 | 3910 tags=28%, list=24%, signal=37% | 0.254944  | 0.857075  | 0.810552  | 0.904006  | 1     | 2318 tags=19%, list=14%, signal=21% |
| ELECTRON_CARRIER_ACTIVITY       | 71  | 0.257899 | 0.772429 | 0.895543 | 0.974591 | 1 | 3030 tags=25%, list=19%, signal=31% | 0.400604  | 1.22061   | 0.122928  | 0.405467  | 1     | 3239 tags=34%, list=20%, signal=42% |
| JAK_STAT_CASCADE                | 27  | 0.308263 | 0.771259 | 0.84194  | 0.97551  | 1 | 2934 tags=26%, list=18%, signal=32% | 0.359799  | 0.907424  | 0.620743  | 0.843156  | 1     | 3688 tags=26%, list=23%, signal=34% |
| GSE1448_CTRL_VS_ANTL_VBETAS_DP  | 185 | 0.230338 | 0.771108 | 0.965812 | 0.975293 | 1 | 2784 tags=18%, list=17%, signal=21% | 0.363513  | 1.23761   | 0.0569697 | 0.377474  | 1     | 1829 tags=20%, list=11%, signal=22% |
| STEROID_HORMONE_RECEPTOR_SIG    | 19  | 0.325499 | 0.770985 | 0.972064 | 0.974979 | 1 | 2348 tags=32%, list=15%, signal=37% | -0.266972 | -0.684051 | 0.940055  | 0.992297  | 1     | 3424 tags=32%, list=21%, signal=40% |
| GSE9988_ANTI_TREM1_VS_CTRL_TRE  | 169 | 0.233767 | 0.770378 | 0.973848 | 0.975268 | 1 | 4132 tags=38%, list=26%, signal=51% | 0.316502  | 1.06098   | 0.322181  | 0.642555  | 1     | 3119 tags=33%, list=19%, signal=41% |
| MEMBRANE_LIPID_BIOSYNTHETIC_PF  | 43  | 0.279078 | 0.768866 | 0.861862 | 0.976511 | 1 | 3859 tags=28%, list=24%, signal=37% | 0.481073  | 1.34412   | 0.0733138 | 0.246419  | 1     | 2854 tags=37%, list=18%, signal=24% |
| LIGAND_GATED_CHANNEL_ACTIVITY   | 34  | 0.288959 | 0.768865 | 0.846697 | 0.976094 | 1 | 5718 tags=32%, list=36%, signal=50% | 0.214484  | 0.56566   | 0.996937  | 0.999511  | 1     | 4126 tags=18%, list=26%, signal=45% |
| GSE2706_UNSTIM_VS_2H_R848_DC    | 152 | 0.237    | 0.768359 | 0.95267  | 0.976243 | 1 | 3419 tags=28%, list=21%, signal=35% | 0.327662  | 1.09248   | 0.254476  | 0.578733  | 1     | 3584 tags=37%, list=22%, signal=47% |
| GSE159310_STIM_VS_STIM_AND_IFN  | 177 | 0.229824 | 0.767979 | 0.962424 | 0.976255 | 1 | 2683 tags=18%, list=17%, signal=21% | 0.369961  | 1.24268   | 0.0661058 | 0.370047  | 1     | 3355 tags=23%, list=13%, signal=41% |
| NEGATIVE_REGULATION_OF_TRANSAC  | 167 | 0.233755 | 0.767468 | 0.975949 | 0.976377 | 1 | 2667 tags=18%, list=17%, signal=21% | 0.279111  | 0.929792  | 0.648272  | 0.811743  | 1     | 2684 tags=21%, list=17%, signal=25% |
| GSE17721_CTRL_VS_PAM3CSK4_0.5H  | 178 | 0.231    | 0.766401 | 0.976773 | 0.977146 | 1 | 2731 tags=19%, list=17%, signal=22% | -0.273737 | -1.06168  | 0.235294  | 0.568481  | 1     | 2009 tags=23%, list=13%, signal=26% |
| PHOSPHOLIPID_METABOLIC_PROCES   | 67  | 0.256072 | 0.76528  | 0.908702 | 0.977883 | 1 | 1517 tags=15%, list=9%, signal=16%  | 0.383124  | 1.16062   | 0.207092  | 0.480288  | 1     | 2959 tags=31%, list=18%, signal=38% |
| ESTABLISHMENT_AND_OR_MAINTEN    | 15  | 0.343987 | 0.765206 | 0.801626 | 0.977541 | 1 | 2108 tags=20%, list=13%, signal=23% | -0.368942 | -0.875111 | 0.640898  | 0.909127  | 1     | 2742 tags=40%, list=17%, signal=48% |
| DNA_HELICASE_ACTIVITY           | 24  | 0.309824 | 0.764612 | 0.823344 | 0.977739 | 1 | 2027 tags=21%, list=13%, signal=24% | -0.31018  | -0.839839 | 0.715365  | 0.961006  | 1     | 1991 tags=29%, list=12%, signal=34% |
| ORGANELLE_OUTER_MEMBRANE        | 21  | 0.319648 | 0.764836 | 0.814873 | 0.977353 | 1 | 3469 tags=33%, list=22%, signal=42% | 0.502374  | 1.23943   | 0.172358  | 0.377356  | 1     | 3506 tags=43%, list=22%, signal=55% |
| GSE27786_CD8_TCELL_VS_NEUTROPI  | 169 | 0.229116 | 0.764131 | 0.965644 | 0.977395 | 1 | 3391 tags=21%, list=21%, signal=27% | -0.240602 | -0.924981 | 0.735577  | 0.809622  | 1     | 1726 tags=17%, list=11%, signal=19% |
| GSE17721_CPG_VS_GARDIQUIMOD_C   | 179 | 0.230828 | 0.764113 | 0.972455 | 0.976998 | 1 | 2469 tags=16%, list=15%, signal=19% | -0.307162 | -1.17202  | 0.0913462 | 0.45331   | 1     | 2842 tags=27%, list=18%, signal=33% |
| GSE14350_IL2R8_KO_VS_WT_TEFF_U  | 174 | 0.230354 | 0.763163 | 0.96247  | 0.977564 | 1 | 3004 tags=22%, list=19%, signal=27% | -0.274642 | -1.05913  | 0.244565  | 0.574306  | 1     | 3140 tags=29%, list=18%, signal=35% |
| NUCLEAR_EXPORT                  | 29  | 0.294394 | 0.758562 | 0.834109 | 0.981634 | 1 | 3804 tags=38%, list=24%, signal=50% | -0.378462 | -1.0678   | 0.329341  | 0.566277  | 1     | 2759 tags=41%, list=17%, signal=50% |
| ORGANIC_ACID_TRANSPORT          | 40  | 0.27787  | 0.758408 | 0.846498 | 0.981708 | 1 | 2634 tags=20%, list=16%, signal=24% | 0.310383  | 0.854185  | 0.73676   | 0.904852  | 1     | 3011 tags=20%, list=19%, signal=25% |
| GSE27786_BCELL_VS_MONO_MAC_U    | 176 | 0.226774 | 0.756415 | 0.97294  | 0.982809 | 1 | 3096 tags=23%, list=19%, signal=29% | -0.226718 | -0.880671 | 0.921659  | 0.902591  | 1     | 3600 tags=35%, list=22%, signal=45% |
| TRANSLATIONAL_INITIATION        | 35  | 0.286725 | 0.756313 | 0.876923 | 0.982481 | 1 | 3786 tags=29%, list=24%, signal=37% | -0.347775 | -1.01888  | 0.404011  | 0.627169  | 1     | 3297 tags=37%, list=21%, signal=47% |
| MAGNESIUM_ION_BINDING           | 54  | 0.263468 | 0.754276 | 0.891273 | 0.983878 | 1 | 3609 tags=26%, list=22%, signal=33% | -0.296059 | -0.948454 | 0.522727  | 0.765532  | 1     | 2105 tags=22%, list=13%, signal=25% |
| LEUKOCYTE_DIFFERENTIATION       | 31  | 0.292432 | 0.752598 | 0.861751 | 0.98358  | 1 | 2318 tags=23%, list=14%, signal=26% | -0.303132 | -0.872014 | 0.711337  | 0.914364  | 1     | 340 tags=10%, list=2%, signal=10%   |
| TRANSFERASE_ACTIVITY_TRANSFERRI | 27  | 0.30181  | 0.751515 | 0.867601 | 0.985913 | 1 | 2164 tags=19%, list=13%, signal=21% | -0.514682 | -1.44175  | 0.0476191 | 0.290742  | 1     | 4150 tags=56%, list=26%, signal=75% |
| GSE10094_LCMV_VS_LISTERIA_IND_E | 178 | 0.223997 | 0.74942  | 0.987421 | 0.986692 | 1 | 3988 tags=21%, list=25%, signal=28% | 0.331726  | 1.12319   | 0.201777  | 0.535889  | 1     | 3277 tags=21%, list=20%, signal=26% |
| NITROGEN_COMPOUND_CATABOLISM    | 26  | 0.295935 | 0.748353 | 0.862805 | 0.987124 | 1 | 3676 tags=35%, list=23%, signal=45% | 0.272277  | 0.687651  | 0.926282  | 0.994066  | 1     | 3768 tags=27%, list=23%, signal=35% |
| ENDOPLASMIC_RETICULUM_PART      | 86  | 0.243379 | 0.746227 | 0.940318 | 0.98839  | 1 | 3941 tags=31%, list=25%, signal=41% | 0.406886  | 1.2693    | 0.0868347 | 0.329368  | 1     | 2129 tags=29%, list=13%, signal=33% |
| GSE13485_DAY1_VS_DAY3_YF170_VJ  | 123 | 0.233644 | 0.746202 | 0.972259 | 0.988108 | 1 | 2100 tags=7%, list=13%, signal=8%   | -0.199707 | -0.732395 | 1         | 0.994203  | 1     | 3631 tags=11%, list=23%, signal=14% |
| METALLOENDOPEPTIDASE_ACTIVITY   | 21  | 0.312024 | 0.745923 | 0.859903 | 0.987761 | 1 | 2115 tags=14%, list=13%, signal=16% | 0.656947  | 1.59038   | 0.0145631 | 0.0748445 | 0.996 | 2056 tags=19%, list=13%, signal=22% |
| SECONDARY_ACTIVE_TRANSMEMBR     | 42  | 0.270668 | 0.74482  | 0.899717 | 0.988178 | 1 | 3116 tags=24%, list=19%, signal=29% | -0.271857 | -0.836319 | 0.792507  | 0.964899  | 1     | 2195 tags=14%, list=14%, signal=17% |
| REGULATION_OF_CELL_ADHESION     | 29  | 0.293486 | 0.743508 | 0.855733 | 0.988767 | 1 | 1368 tags=14%, list=9%, signal=15%  | 0.325627  | 0.847441  | 0.707355  | 0.911799  | 1     | 343 tags=10%, list=2%, signal=11%   |
| CARBOXYLIC_ACID_TRANSPORT       | 39  | 0.27788  | 0.74329  | 0.882963 | 0.988511 | 1 | 2634 tags=21%, list=16%, signal=24% | 0.310395  | 0.838928  | 0.733638  | 0.915623  | 1     | 3011 tags=21%, list=19%, signal=25% |
| NEURON_PROJECTION               | 21  | 0.310962 | 0.742341 | 0.853226 | 0.988785 | 1 | 2860 tags=19%, list=18%, signal=23% | 0.451253  | 1.10002   | 0.319797  | 0.561738  | 1     | 201 tags=10%, list=1%, signal=10%   |
| REGULATION_OF_TRANSLATIONAL_INI | 27  | 0.295939 | 0.742306 | 0.875614 | 0.988389 | 1 | 3786 tags=30%, list=24%, signal=39% | -0.341825 | -0.959365 | 0.489855  | 0.748273  | 1     | 2160 tags=30%, list=13%, signal=34% |
| G_PROTEIN_COUPLED_RECEPTOR_BI   | 48  | 0.266333 | 0.741159 | 0.912917 | 0.988785 | 1 | 2214 tags=13%, list=14%, signal=14% | 0.405529  | 1.15397   | 0.212209  | 0.487994  | 1     | 2677 tags=19%, list=17%, signal=22% |
| GSE17721_4H_VS_24H_POLYIC_BMD   | 182 | 0.221364 | 0.740928 | 0.993969 | 0.988522 | 1 | 2589 tags=18%, list=16%, signal=21% | -0.323299 | -1.25135  | 0.0208333 | 0.372839  | 1     | 2652 tags=31%, list=17%, signal=37% |
| GENERATION_OF_PRECURSOR_META    | 112 | 0.232993 | 0.740731 | 0.984021 | 0.988257 | 1 | 3584 tags=24%, list=22%, signal=31% | 0.39528   | 1.28621   | 0.0632571 | 0.306355  | 1     | 3373 tags=34%, list=21%, signal=43% |
| ACTIVATION_OF_NF_KAPPAB_TRANS   | 16  | 0.326126 | 0.7407   | 0.834697 | 0.987862 | 1 | 2502 tags=25%, list=16%, signal=30% | -0.314974 | -0.777387 | 0.972553  | 0.995072  | 1     | 3736 tags=44%, list=23%, signal=57% |
| ANION_TRANSPORT                 | 27  | 0.296024 | 0.740427 | 0.864734 | 0.987638 | 1 | 4078 tags=30%, list=25%, signal=40% | -0.286057 | -0.800046 | 0.831025  | 0.988551  | 1     | 1403 tags=15%, list=9%, signal=16%  |
| INOSITOL_OR_PHOSPHATIDYLINOSIT  | 16  | 0.32948  | 0.739944 | 0.834711 | 0.987556 | 1 | 1184 tags=19%, list=7%, signal=20%  | -0.340194 | -0.842548 | 0.693095  | 0.960833  | 1     | 2330 tags=38%, list=15%, signal=44% |
| GSE18791_UNSTIM_VS_NEWCATSLC    | 168 | 0.222007 | 0.739    | 0.991217 | 0.98778  | 1 | 3170 tags=21%, list=20%, signal=26% | 0.231189  | 0.776854  | 0.954198  | 0.970079  | 1     | 2432 tags=17%, list=15%, signal=20% |
| AMINO_ACID_TRANSMEMBRANE_TR     | 29  | 0.288811 | 0.738205 | 0.878274 | 0.987856 | 1 | 2634 tags=17%, list=16%, signal=21% | -0.352905 | -1.00652  | 0.438642  | 0.642098  | 1     | 2686 tags=21%, list=17%, signal=25% |
| ONE_CARBON_COMPOUND_METABC      | 25  | 0.296323 | 0.738129 | 0.854232 | 0.987497 | 1 | 4568 tags=44%, list=28%, signal=61% | 0.280243  | 0.699613  | 0.918877  | 0.994693  | 1     | 3059 tags=24%, list=19%, signal=30% |
| LIGAND_DEPENDENT_NUCLEAR_REC    | 23  | 0.304143 | 0.737413 | 0.866687 | 0.987556 | 1 | 643 tags=13%, list=4%, signal=14%   | 0.341807  | 0.831978  | 0.740399  | 0.924034  | 1     | 753 tags=13%, list=5%, signal=14%   |
| EXTRACELLULAR_STRUCTURE_ORGAN   | 27  | 0.294045 | 0.736481 | 0.883758 | 0.987738 | 1 | 5608 tags=33%, list=35%, signal=51% | -0.417954 | -1.14884  | 0.240223  | 0.467427  | 1     | 5276 tags=44%, list=33%, signal=66% |
| NITROGEN_COMPOUND_BIOSYNTHETI   | 21  | 0.308503 | 0.736304 | 0.869702 | 0.987593 | 1 | 4764 tags=48%, list=30%, signal=68% | 0.544615  | 1.32302   | 0.112416  | 0.269543  | 1     | 3635 tags=38%, list=23%, signal=49% |
| TRANSLATION_REGULATOR_ACTIVITY  | 39  | 0.2752   | 0.736025 | 0.887556 | 0.987184 | 1 | 1140 tags=13%, list=7%, signal=14%  | 0.29974   | 0.814095  | 0.783259  | 0.943967  | 1     | 1436 tags=13%, list=9%, signal=14%  |
| GSE27786_CD8_TCELL_VS_ERYTHROE  | 171 | 0.221433 | 0.735767 | 0.991566 | 0.986934 | 1 | 3887 tags=31%, list=24%, signal=40% | -0.272607 | -1.03827  | 0.295918  | 0.60044   | 1     | 2977 tags=34%, list=19%, signal=41% |
| ENERGY_DERIVATION_BY_OXIDATION  | 34  | 0.280215 | 0.734709 | 0.889894 | 0.987194 | 1 | 1920 tags=15%, list=12%, signal=17% | 0.433998  | 1.16273   | 0.478246  | 0.748246  | 1     | 3504 tags=41%, list=22%, signal=53% |
| GSE17721_CTRL_VS_CPG_2H_BMDM    | 184 | 0.218717 | 0.734669 | 0.996355 | 0.986799 | 1 | 3737 tags=27%, list=23%, signal=34% | 0.35903   | 1.21108   | 0.089441  | 0         |       |                                     |

Supplementary Table 3. Gene enrichment statistics for HD and control monkeys.

|                                 |     |           |          |            |          |       |                                     |           |           |           |          |       |                                     |
|---------------------------------|-----|-----------|----------|------------|----------|-------|-------------------------------------|-----------|-----------|-----------|----------|-------|-------------------------------------|
| OXIDOREDUCTASE_ACTIVITY_ACTING  | 24  | 0.283807  | 0.698273 | 0.930556   | 0.994181 | 1     | 2992 tags=25%, list=19%, signal=31% | 0.598143  | 1.46837   | 0.0390061 | 0.145477 | 1     | 3147 tags=50%, list=20%, signal=62% |
| STRUCTURE_SPECIFIC_DNA_BINDING  | 52  | 0.242439  | 0.695624 | 0.958807   | 0.994572 | 1     | 3220 tags=23%, list=20%, signal=29% | -0.277751 | -0.892073 | 0.172934  | 0.88478  | 1     | 1959 tags=25%, list=12%, signal=28% |
| NUCLEOBASENUCLEOSIDENUCLEOTID   | 28  | 0.272042  | 0.694463 | 0.933116   | 0.994489 | 1     | 2698 tags=25%, list=17%, signal=30% | 0.362517  | 0.921777  | 0.609302  | 0.825964 | 1     | 2265 tags=29%, list=14%, signal=33% |
| POSITIVE_REGULATION_OF_SECRET   | 17  | 0.302651  | 0.693128 | 0.904448   | 0.994452 | 1     | 2597 tags=24%, list=16%, signal=28% | 0.372321  | 0.856266  | 0.686341  | 0.90363  | 1     | 3273 tags=29%, list=20%, signal=37% |
| GSE2706_LPS_VS_R848_AND_LPS_2H  | 141 | 0.21234   | 0.692507 | 0.998733   | 0.994221 | 1     | 4841 tags=28%, list=30%, signal=39% | 0.279535  | 0.925122  | 0.632258  | 0.820166 | 1     | 2647 tags=15%, list=16%, signal=18% |
| MRNA_METABOLIC_PROCESS          | 74  | 0.232383  | 0.69247  | 0.980556   | 0.993817 | 1     | 2875 tags=24%, list=18%, signal=29% | -0.330217 | -1.11917  | 0.193662  | 0.492246 | 1     | 3869 tags=43%, list=24%, signal=57% |
| ENDOPLASMIC_RETICULUM_MEMBR     | 76  | 0.227783  | 0.68975  | 0.986523   | 0.994116 | 1     | 3941 tags=32%, list=25%, signal=42% | 0.40193   | 1.22301   | 0.126062  | 0.398545 | 1     | 2129 tags=29%, list=13%, signal=33% |
| NUCLEOTIDYLTRANSFERASE_ACTIVITY | 44  | 0.249411  | 0.688161 | 0.962697   | 0.994126 | 1     | 3374 tags=27%, list=21%, signal=34% | 0.296913  | 0.830548  | 0.752562  | 0.924712 | 1     | 3234 tags=32%, list=20%, signal=40% |
| REGULATION_OF_NUCLEOCYTOPLASM   | 20  | 0.292975  | 0.687123 | 0.903876   | 0.993966 | 1     | 2597 tags=25%, list=16%, signal=30% | 0.372536  | 0.885183  | 0.689752  | 0.874071 | 1     | 2908 tags=35%, list=18%, signal=43% |
| ANION_CATION_SYMPORTER_ACTIVI   | 10  | 0.302574  | 0.674285 | 0.915683   | 0.996336 | 1     | 3068 tags=27%, list=19%, signal=33% | -0.382643 | -0.916505 | 0.594315  | 0.828397 | 1     | 1319 tags=13%, list=8%, signal=15%  |
| REGULATION_OF_INTRACELLULAR_TF  | 23  | 0.274516  | 0.673856 | 0.95559    | 0.996005 | 1     | 2597 tags=22%, list=16%, signal=26% | 0.371392  | 0.914219  | 0.597872  | 0.834255 | 1     | 3091 tags=35%, list=19%, signal=43% |
| VIRAL_GENOME_REPLICATION        | 18  | 0.291262  | 0.673398 | 0.910569   | 0.995672 | 1     | 1896 tags=17%, list=12%, signal=19% | 0.366067  | 0.85285   | 0.683502  | 0.905663 | 1     | 3240 tags=28%, list=20%, signal=35% |
| RAS_GUANYL_NUCLEOTIDE_EXCHANG   | 15  | 0.301967  | 0.671306 | 0.918782   | 0.99564  | 1     | 57 tags=7%, list=0%, signal=7%      | 0.357906  | 0.791659  | 0.768313  | 0.963597 | 1     | 3269 tags=40%, list=20%, signal=50% |
| THYROID_HORMONE_RECEPTOR_BIN    | 17  | 0.28992   | 0.666648 | 0.931529   | 0.99602  | 1     | 2198 tags=24%, list=14%, signal=27% | -0.257107 | -0.623822 | 0.969152  | 0.995761 | 1     | 4296 tags=41%, list=27%, signal=56% |
| APICAL_PART_OF_CELL             | 15  | 0.295049  | 0.659081 | 0.93131    | 0.996844 | 1     | 3919 tags=27%, list=24%, signal=35% | -0.573582 | -1.39955  | 0.0968586 | 0.304524 | 1     | 4798 tags=47%, list=30%, signal=67% |
| NUCLEAR_BODY                    | 29  | 0.256626  | 0.657001 | 0.955658   | 0.996743 | 1     | 4041 tags=34%, list=25%, signal=46% | 0.397434  | 1.03721   | 0.406442  | 0.686914 | 1     | 2289 tags=28%, list=14%, signal=32% |
| DRUG_BINDING                    | 15  | 0.287097  | 0.639733 | 0.920266   | 0.99854  | 1     | 4407 tags=53%, list=27%, signal=73% | -0.288775 | -0.705209 | 0.8925    | 0.993063 | 1     | 3294 tags=47%, list=21%, signal=59% |
| TRANSMEMBRANE_RECEPTOR_PROTI    | 40  | 0.234949  | 0.63077  | 0.983333   | 0.99906  | 1     | 3356 tags=23%, list=21%, signal=28% | -0.500998 | -1.47607  | 0.0123547 | 0.292942 | 1     | 1755 tags=38%, list=21%, signal=42% |
| PHOSPHONOSITIDE_METABOLIC_PRC   | 28  | 0.253     | 0.629952 | 0.977169   | 0.998721 | 1     | 1320 tags=14%, list=8%, signal=16%  | 0.475527  | 1.23983   | 0.154705  | 0.377487 | 1     | 2615 tags=36%, list=16%, signal=43% |
| LIPOPROTEIN_METABOLIC_PROCESS   | 30  | 0.242611  | 0.620799 | 0.984076   | 0.999115 | 1     | 3161 tags=23%, list=20%, signal=29% | 0.426862  | 1.11035   | 0.304878  | 0.548845 | 1     | 3263 tags=37%, list=20%, signal=46% |
| TUBE_DEVELOPMENT                | 18  | 0.267672  | 0.617617 | 0.964346   | 0.998951 | 1     | 3164 tags=17%, list=20%, signal=21% | -0.392512 | -0.97753  | 0.506297  | 0.704587 | 1     | 3326 tags=28%, list=21%, signal=35% |
| NEGATIVE_REGULATION_OF_TRANSP   | 17  | 0.272619  | 0.616296 | 0.957307   | 0.998631 | 1     | 4699 tags=41%, list=29%, signal=58% | 0.553592  | 1.29605   | 0.108626  | 0.294102 | 1     | 992 tags=18%, list=6%, signal=19%   |
| MICROTUBULE_BINDING             | 28  | 0.24086   | 0.609426 | 0.985737   | 0.998724 | 1     | 4057 tags=36%, list=25%, signal=48% | -0.276479 | -0.758067 | 0.894207  | 0.99578  | 1     | 4296 tags=41%, list=16%, signal=54% |
| ER_GOLGI_INTERMEDIATE_COMPART   | 24  | 0.249657  | 0.602073 | 0.971515   | 0.998806 | 1     | 5107 tags=42%, list=32%, signal=61% | 0.30456   | 0.74976   | 0.846774  | 0.983422 | 1     | 3400 tags=33%, list=21%, signal=42% |
| TRANSLATION_FACTOR_ACTIVITY_NU  | 37  | 0.226751  | 0.600379 | 0.992582   | 0.998502 | 1     | 1140 tags=11%, list=7%, signal=12%  | 0.254895  | 0.698531  | 0.932203  | 1.493605 | 1     | 1436 tags=11%, list=9%, signal=12%  |
| HORMONE_ACTIVITY                | 40  | 0.220521  | 0.5987   | 0.994021   | 0.998183 | 1     | 3564 tags=10%, list=22%, signal=13% | 0.482403  | 1.32097   | 0.0851064 | 0.266547 | 1     | 2671 tags=13%, list=17%, signal=15% |
| TUBE_MORPHOGENESIS              | 15  | 0.267709  | 0.597701 | 0.956594   | 0.997841 | 1     | 3164 tags=20%, list=20%, signal=25% | -0.392551 | -0.943261 | 0.858065  | 0.771433 | 1     | 3326 tags=33%, list=21%, signal=42% |
| DNA_DEPENDENT_ATPASE_ACTIVITY   | 20  | 0.247682  | 0.585939 | 0.981623   | 0.998085 | 1     | 2027 tags=15%, list=13%, signal=17% | 0.459047  | 1.10423   | 0.320064  | 0.555886 | 1     | 2666 tags=45%, list=17%, signal=54% |
| NUCLEAR_PORE                    | 26  | 0.232276  | 0.581764 | 0.987616   | 0.997853 | 1     | 2927 tags=27%, list=18%, signal=33% | 0.452552  | 1.13841   | 0.271242  | 0.512189 | 1     | 1656 tags=23%, list=10%, signal=26% |
| STRUCTURAL_CONSTITUENT_OF_RIB   | 78  | -0.667829 | -2.27452 | 0          | 0        | 0     | 3638 tags=77%, list=23%, signal=99% | -0.738402 | -2.529    | 0         | 0        | 0     | 2262 tags=73%, list=14%, signal=85% |
| GSE22886_NAIVE_TCCELL_VS_DC_UP  | 169 | -0.479217 | -1.84031 | 0          | 0.902488 | 0.225 | 3571 tags=53%, list=22%, signal=67% | -0.551613 | -2.14149  | 0         | 0        | 0     | 2254 tags=47%, list=14%, signal=54% |
| SULFURIC_ESTER_HYDROLASE_ACTIVI | 15  | -0.67714  | -1.58417 | 0.0147059  | 0.919496 | 0.978 | 1161 tags=27%, list=7%, signal=29%  | 0.485884  | 1.08497   | 0.364516  | 0.595738 | 1     | 1048 tags=20%, list=7%, signal=21%  |
| GSE34205_HEALTHY_VS_RSV_INF_INI | 154 | -0.419526 | -1.56554 | 0          | 0.807659 | 0.993 | 3684 tags=47%, list=23%, signal=61% | -0.310979 | -1.19759  | 0.0571429 | 0.427231 | 1     | 2386 tags=29%, list=15%, signal=34% |
| TRNA_METABOLIC_PROCESS          | 18  | -0.617453 | -1.55586 | 0.0243902  | 0.697074 | 0.996 | 3100 tags=56%, list=19%, signal=69% | 0.460389  | 1.08552   | 0.356423  | 0.594827 | 1     | 3094 tags=56%, list=19%, signal=69% |
| GSE14769_UNSTIM_VS_20MIN_LPS_I  | 168 | -0.385467 | -1.4562  | 0.00540541 | 1        | 1     | 1549 tags=16%, list=10%, signal=18% | 0.339214  | 1.13859   | 0.176398  | 0.512146 | 1     | 4591 tags=26%, list=29%, signal=35% |
| RNA_BINDING                     | 240 | -0.363806 | -1.43381 | 0          | 1        | 1     | 3183 tags=40%, list=20%, signal=49% | -0.448901 | -1.75845  | 0         | 0.13457  | 0.521 | 2381 tags=35%, list=15%, signal=41% |
| HORMONE_SECRETION               | 16  | -0.599535 | -1.4327  | 0.0680101  | 1        | 1     | 1506 tags=19%, list=9%, signal=21%  | -0.327952 | -0.803455 | 0.763298  | 0.988119 | 1     | 1255 tags=13%, list=8%, signal=14%  |
| GSE22886_NAIVE_BCCELL_VS_NEUTRC | 171 | -0.373293 | -1.42648 | 0.00518135 | 1        | 1     | 3638 tags=47%, list=23%, signal=61% | -0.440086 | -1.70102  | 0         | 0.181587 | 0.731 | 2087 tags=38%, list=13%, signal=43% |
| GSE1460_DP_THYMOCYTE_VS_NAIVE   | 174 | -0.366932 | -1.38674 | 0          | 1        | 1     | 2908 tags=35%, list=18%, signal=42% | -0.393707 | -1.5075   | 0         | 0.317036 | 0.999 | 1957 tags=30%, list=12%, signal=34% |
| HYDROLASE_ACTIVITY_ACTING_ON_C  | 41  | -0.405553 | -1.38498 | 0.0350877  | 1        | 1     | 3172 tags=41%, list=20%, signal=52% | 0.365386  | 0.999664  | 0.465492  | 0.741198 | 1     | 1757 tags=17%, list=11%, signal=19% |
| GSE13229_IMM_VS_MATURE_NKCELL   | 177 | -0.357772 | -1.3834  | 0          | 1        | 1     | 1693 tags=23%, list=11%, signal=26% | 0.272347  | 0.926705  | 0.661446  | 0.818719 | 1     | 2722 tags=21%, list=17%, signal=25% |
| GSE3982_NEUTROPHIL_VS_CENT_ME   | 175 | -0.364627 | -1.38029 | 0.00543478 | 1        | 1     | 4005 tags=45%, list=25%, signal=59% | 0.261272  | 0.887759  | 0.714625  | 0.872786 | 1     | 3609 tags=33%, list=22%, signal=42% |
| GSE11057_NAIVE_CD4_VS_PBMCM_CD  | 158 | -0.363577 | -1.37971 | 0.0153061  | 0.935481 | 1     | 2829 tags=35%, list=18%, signal=43% | -0.282676 | -1.06978  | 0.226238  | 0.552939 | 1     | 2362 tags=29%, list=15%, signal=34% |
| GSE22886_NAIVE_CDB_TCCELL_VS_MC | 173 | -0.359156 | -1.37276 | 0          | 0.917967 | 1     | 2564 tags=31%, list=16%, signal=37% | -0.280447 | -1.06778  | 0.264423  | 0.554808 | 1     | 2519 tags=23%, list=16%, signal=31% |
| GSE27786_CD4_VS_CDB_TCCELL_DN   | 171 | -0.365724 | -1.37269 | 0.00584795 | 0.919691 | 1     | 3485 tags=41%, list=22%, signal=52% | 0.264024  | 0.888948  | 0.740834  | 0.871428 | 1     | 2990 tags=27%, list=19%, signal=28% |
| GSE24102_GSPANUCLOCYSTIC_MDSC_V | 171 | -0.358918 | -1.37257 | 0          | 0.811062 | 1     | 3602 tags=36%, list=22%, signal=46% | -0.27482  | -1.07051  | 0.206522  | 0.553168 | 1     | 3347 tags=37%, list=21%, signal=46% |
| NEUROPEPTIDE_BINDING            | 21  | -0.520899 | -1.37027 | 0.0775401  | 0.778845 | 1     | 21 tags=5%, list=0%, signal=5%      | -0.472428 | -1.26239  | 0.136247  | 0.365244 | 1     | 1941 tags=10%, list=12%, signal=11% |
| GSE22886_NAIVE_CDB_TCCELL_VS_ME | 159 | -0.353551 | -1.34447 | 0.00584795 | 0.688787 | 1     | 2464 tags=26%, list=15%, signal=30% | -0.255137 | -0.977444 | 0.85437   | 0.703612 | 1     | 2441 tags=21%, list=15%, signal=25% |
| NEUROPEPTIDE_RECEPTOR_ACTIVITY  | 20  | -0.521027 | -1.33792 | 0.100985   | 0.879948 | 1     | 21 tags=5%, list=0%, signal=5%      | -0.4986   | -1.2806   | 0.150943  | 0.348429 | 1     | 1941 tags=10%, list=12%, signal=11% |
| GSE25087_FETAL_VS_ADULT_TCONV   | 150 | -0.355601 | -1.33669 | 0.0101523  | 0.844859 | 1     | 3430 tags=35%, list=21%, signal=44% | -0.396642 | -1.48352  | 0         | 0.304901 | 1     | 2440 tags=31%, list=15%, signal=37% |
| GSE13411_IGM_MEMORY_BCCELL_VS   | 163 | -0.349505 | -1.33227 | 0.00595238 | 0.834488 | 1     | 2923 tags=34%, list=18%, signal=42% | -0.389184 | -1.49711  | 0         | 0.317282 | 1     | 3031 tags=37%, list=19%, signal=45% |
| GSE3982_BCCELL_VS_BASOPHIL_UP   | 166 | -0.354949 | -1.32026 | 0.0115607  | 0.8579   | 1     | 3003 tags=34%, list=19%, signal=42% | 0.285946  | 0.963313  | 0.529842  | 0.773909 | 1     | 1775 tags=18%, list=11%, signal=20% |
| HYDROLASE_ACTIVITY_ACTING_ON_C  | 19  | -0.520242 | -1.31985 | 0.123116   | 0.834782 | 1     | 3172 tags=47%, list=20%, signal=59% | 0.518495  | 1.21687   | 0.20315   | 0.409106 | 1     | 1056 tags=21%, list=7%, signal=23%  |
| GSE34205_HEALTHY_VS_FLU_INF_INI | 159 | -0.348201 | -1.31745 | 0.0218579  | 0.815181 | 1     | 3751 tags=47%, list=23%, signal=60% | -0.369702 | -1.43002  | 0         | 0.297053 | 1     | 1312 tags=28%, list=8%, signal=31%  |
| SMALL_NUCLEAR_RIBONUCLEOPROTI   | 21  | -0.508464 | -1.31271 | 0.129199   | 0.810022 | 1     | 3711 tags=48%, list=23%, signal=62% | 0.292721  | 0.702218  | 0.899361  | 0.994856 | 1     | 3894 tags=38%, list=24%, signal=50% |
| DETECTION_OF_STIMULUS_INVOLV    | 18  | -0.5224   | -1.31243 | 0.119701   | 0.781262 | 1     | 5246 tags=44%, list=33%, signal=66% | -0.50113  | -1.26248  | 0.136038  | 0.367896 | 1     | 4767 tags=28%, list=30%, signal=39% |
| GSE13485_DAV3_VS_DAV7_YF17D_VI  | 138 | -0.34808  | -1.30672 | 0.0197044  | 0.784721 | 1     | 3038 tags=30%, list=19%, signal=37% | -0.36641  | -1.34958  | 0.2030415 | 0.329239 | 1     | 2179 tags=25%, list=14%, signal=29% |
| GSE22886_NAIVE_CDB_TCCELL_VS_DC | 164 | -0.342186 | -1.30324 | 0.00591716 | 0.777403 | 1     | 2728 tags=35%, list=17%, signal=42% | -0.341053 | -1.29829  | 0.104218  | 0.350711 | 1     | 2254 tags=31%, list=14%, signal=29% |
| SYNAPTOTOGENESIS                | 17  | -0.533379 | -1.30234 | 0.115764   | 0.756158 | 1     | 611 tags=6%, list=4%, signal=6%     | -0.564066 | -1.41759  | 0.0913462 | 0.299185 | 1     | 5086 tags=35%, list=32%, signal=56% |
| GSE17721_PAM3CSK4_VS_GADIQUIM   | 174 | -0.345692 | -1.30083 | 0.0338983  | 0.739892 | 1     | 2908 tags=26%, list=18%, signal=32% | 0.269915  | 0.914875  | 0.680892  | 0.832779 | 1     | 3010 tags=18%, list=19%, signal=22% |
| OXIDOREDUCTASE_ACTIVITY_GO_001  | 52  | -0.410585 | -1.29832 | 0.0689655  | 0.73091  | 1     | 2214 tags=21%, list=14%, signal=24% | 0.358173  | 1.02464   | 0.439545  | 0.703715 | 1     | 4840 tags=44%, list=30%, signal=63% |
| CARBON_OXYGEN_LYASE_ACTIVITY    | 31  | -0.455176 | -1.29821 | 0.105556   | 0.709456 | 1     | 3006 tags=48%, list=19%, signal=59% | -0.232937 | -0.658337 | 0.976253  | 0.992206 | 1     | 2919 tags=19%, list=18%, signal=24% |
| GSE3982_BASOPHIL_VS_NKCELL_DN   | 164 | -0.346439 | -1.29516 | 0.0259067  | 0.703626 | 1     | 2310 tags=25%, list=14%, signal=29% | 0.331354  | 1.11024   | 0.242274  | 0.54873  | 1     | 3047 tags=24%, list=19%, signal=30% |
| GSE10239_NAIVE_VS_KLRG1HIGH_EF  | 177 | -0.33995  | -1.2951  | 0.00675676 | 0.683788 | 1     | 2829 tags=36%, list=18%, signal=43% | -0.428487 | -1.65622  | 0         | 0.224974 | 0.876 | 2672 tags=37%, list=17%, signal=44% |
| GSE7852_THYMUS_VS_FAT_TREG_UP   | 176 | -0.338377 | -1.29023 | 0.0111111  | 0.686956 | 1     | 2463 tags=33%, list=15%, signal=39% | -0.298696 | -1.1527   | 0.0909091 | 0.467979 | 1     | 3276 tags=36%, list=20%, signal=44% |
| ENDONUCLEASE_ACTIVITY           | 24  | -0.4757   | -1.28646 | 0.0921409  | 0.686785 | 1     | 4478 tags=67%, list=28%, signal=92% | -0.295872 | -0.786587 | 0.810298  | 0.99255  | 1     | 1182 tags=17%, list=7%, signal=18%  |
| GSE6269_HEALTHY_VS_ST           |     |           |          |            |          |       |                                     |           |           |           |          |       |                                     |

Supplementary Table 3. Gene enrichment statistics for HD and control monkeys.

|                                     |     |           |          |           |          |   |                                     |           |           |            |          |       |                                     |
|-------------------------------------|-----|-----------|----------|-----------|----------|---|-------------------------------------|-----------|-----------|------------|----------|-------|-------------------------------------|
| GSE3982_MAC_VS_BCELL_DN             | 166 | -0.3335   | -1.23492 | 0.0465116 | 0.711228 | 1 | 2170 tags=26%, list=14%, signal=30% | 0.271206  | 0.910652  | 0.696361   | 0.839946 | 1     | 2917 tags=27%, list=18%, signal=32% |
| SPUCEOSOME                          | 47  | -0.400277 | -1.23413 | 0.071375  | 0.701735 | 1 | 1933 tags=28%, list=12%, signal=31% | 0.321277  | 0.910663  | 0.620795   | 0.840404 | 1     | 3942 tags=36%, list=25%, signal=48% |
| GSE11057_NAIVE_VS_MEMORY_CD4        | 152 | -0.32954  | -1.22887 | 0.0582011 | 0.71541  | 1 | 1980 tags=24%, list=12%, signal=27% | -0.380531 | -1.43804  | 0          | 0.292209 | 1     | 2398 tags=30%, list=15%, signal=34% |
| LYASE_ACTIVITY                      | 68  | -0.36984  | -1.22469 | 0.112676  | 0.724495 | 1 | 1741 tags=26%, list=11%, signal=30% | 0.370711  | 1.12375   | 0.251101   | 0.534472 | 1     | 2415 tags=24%, list=15%, signal=28% |
| RNA_PROCESSING                      | 161 | -0.316132 | -1.22313 | 0.0346535 | 0.719851 | 1 | 3141 tags=33%, list=20%, signal=41% | -0.292284 | -1.11695  | 0.10396    | 0.489954 | 1     | 2207 tags=26%, list=14%, signal=30% |
| GOLDRATH_NAIVE_VS_EFF_CD8_TCEI      | 181 | -0.317876 | -1.22242 | 0.038674  | 0.711238 | 1 | 2885 tags=35%, list=18%, signal=43% | -0.248137 | -0.956181 | 0.622222   | 0.75524  | 1     | 2633 tags=30%, list=18%, signal=36% |
| RIBOSOME_BIogenesis_AND_ASSEMBLY    | 18  | -0.483793 | -1.21584 | 0.19084   | 0.734227 | 1 | 4204 tags=72%, list=26%, signal=98% | -0.411339 | -1.03768  | 0.504194   | 0.598555 | 1     | 1804 tags=28%, list=10%, signal=31% |
| GSE22886_NAIVE_TCELL_VS_MONOCYTES   | 172 | -0.317411 | -1.21199 | 0.0542169 | 0.742665 | 1 | 2147 tags=27%, list=13%, signal=31% | -0.252596 | -0.971291 | 0.551402   | 0.718706 | 1     | 2519 tags=26%, list=16%, signal=30% |
| GSE6269_E_COLI_VS_STREP_PNEUMONIAE  | 142 | -0.322229 | -1.2099  | 0.0456853 | 0.741883 | 1 | 1751 tags=20%, list=11%, signal=23% | -0.277843 | -1.02948  | 0.625281   | 0.610632 | 1     | 2945 tags=31%, list=18%, signal=38% |
| DNA_DIRECTED_RNA_POLYMERASEII       | 64  | -0.368522 | -1.20898 | 0.139623  | 0.734508 | 1 | 3244 tags=42%, list=20%, signal=53% | 0.27094   | 0.801909  | 0.835256   | 0.954439 | 1     | 4474 tags=39%, list=28%, signal=54% |
| GSE26495_NAIVE_VS_PD1LOW_CD8_T      | 150 | -0.319193 | -1.20397 | 0.0517241 | 0.745017 | 1 | 3056 tags=37%, list=19%, signal=45% | -0.287084 | -1.07089  | 0.595417   | 0.554917 | 1     | 2515 tags=27%, list=16%, signal=31% |
| GSE13485_DAY7_VS_DAY21_YF17D_V      | 131 | -0.322326 | -1.20395 | 0.0526316 | 0.737699 | 1 | 2048 tags=12%, list=13%, signal=14% | 0.262782  | 0.854159  | 0.819899   | 0.904435 | 1     | 1385 tags=8%, list=9%, signal=8%    |
| GSE360_L_MAJOR_VS_B_MALAYI_LO       | 174 | -0.314174 | -1.20058 | 0.0268817 | 0.744275 | 1 | 2662 tags=27%, list=17%, signal=32% | 0.295884  | 0.986044  | 0.491925   | 0.749541 | 1     | 3840 tags=30%, list=24%, signal=40% |
| GSE18791_CTRL_VS_NEWCASTLE_VIR      | 161 | -0.312099 | -1.19605 | 0.0591133 | 0.75653  | 1 | 2967 tags=36%, list=18%, signal=44% | 0.231879  | 0.772039  | 0.970738   | 0.974721 | 1     | 2742 tags=24%, list=17%, signal=28% |
| OXIDOREDUCTASE_ACTIVITY_ACTING      | 58  | -0.363391 | -1.19274 | 0.155063  | 0.763927 | 1 | 2214 tags=19%, list=14%, signal=22% | 0.352709  | 1.02569   | 0.40176    | 0.701434 | 1     | 4840 tags=43%, list=30%, signal=61% |
| GSE15930_STIM_VS_STIM_AND_TRIC      | 176 | -0.308341 | -1.19096 | 0.0514286 | 0.762195 | 1 | 2990 tags=27%, list=19%, signal=33% | 0.250863  | 0.845603  | 0.845018   | 0.912711 | 1     | 4061 tags=32%, list=25%, signal=42% |
| GSE3982_EOSINOPHIL_VS_BASOPHIL      | 176 | -0.309576 | -1.18957 | 0.0652666 | 0.758726 | 1 | 3296 tags=34%, list=21%, signal=42% | -0.439014 | -1.67126  | 0          | 0.21633  | 0.839 | 2012 tags=35%, list=14%, signal=40% |
| GSE24634_TEFF_VS_TCONV_DAYS_1N      | 165 | -0.318428 | -1.1872  | 0.0646766 | 0.760347 | 1 | 2969 tags=37%, list=18%, signal=45% | -0.269769 | -1.03729  | 0.335025   | 0.598715 | 1     | 2292 tags=25%, list=13%, signal=29% |
| GSE13485_DAY3_VS_DAY21_YF17D_V      | 127 | -0.321988 | -1.18181 | 0.062201  | 0.779393 | 1 | 2999 tags=16%, list=19%, signal=19% | -0.224006 | -0.80507  | 0.96       | 0.987891 | 1     | 3071 tags=12%, list=19%, signal=14% |
| GOLDRATH_EFF_VS_MEMORY_CD8_T        | 185 | -0.308842 | -1.17795 | 0.0824176 | 0.79121  | 1 | 2485 tags=30%, list=15%, signal=35% | -0.395002 | -1.52293  | 0          | 0.303021 | 0.998 | 2833 tags=37%, list=18%, signal=44% |
| GSE15750_DAY6_VS_DAY10_EFF_CD8_T    | 165 | -0.311385 | -1.17637 | 0.0478723 | 0.790093 | 1 | 1827 tags=22%, list=11%, signal=25% | -0.264186 | -1.00471  | 0.418182   | 0.64449  | 1     | 1878 tags=20%, list=12%, signal=22% |
| GSE36392_EOSINOPHIL_VS_NEUTROPHIL   | 180 | -0.304841 | -1.17541 | 0.0681818 | 0.784831 | 1 | 3705 tags=38%, list=23%, signal=49% | 0.308374  | 1.03956   | 0.364213   | 0.683845 | 1     | 2670 tags=28%, list=17%, signal=33% |
| GSE27786_NKCELL_VS_MONO_MAC         | 180 | -0.30493  | -1.174   | 0.0742857 | 0.782461 | 1 | 3132 tags=32%, list=20%, signal=40% | 0.307104  | 1.04227   | 0.351828   | 0.678495 | 1     | 2295 tags=23%, list=14%, signal=26% |
| GSE10239_MEMORY_VS_KLRG1HIGH        | 161 | -0.305702 | -1.17351 | 0.0873786 | 0.774857 | 1 | 2799 tags=25%, list=17%, signal=31% | -0.300502 | -1.15233  | 0.0990566  | 0.467239 | 1     | 3324 tags=27%, list=21%, signal=34% |
| GSE1432_GH_VS_24H_ILFNG_MICROG      | 176 | -0.302976 | -1.17168 | 0.067265  | 0.775815 | 1 | 2636 tags=26%, list=16%, signal=31% | 0.363509  | 1.22033   | 0.0872818  | 0.405775 | 1     | 3587 tags=36%, list=22%, signal=46% |
| GSE29615_CTRL_VS_DAY3_LAIV_IFLU     | 152 | -0.308353 | -1.16607 | 0.0817308 | 0.798805 | 1 | 3646 tags=29%, list=23%, signal=37% | -0.261787 | -1.00628  | 0.415844   | 0.64184  | 1     | 2248 tags=19%, list=14%, signal=22% |
| GSE17771_POLYIC_VS_CPG_0_5H_MB      | 175 | -0.303788 | -1.16552 | 0.0617284 | 0.791531 | 1 | 2493 tags=24%, list=16%, signal=28% | 0.353742  | 1.19452   | 0.190525   | 0.434316 | 1     | 2059 tags=16%, list=13%, signal=18% |
| GSE26495_NAIVE_VS_PD1HIGH_CD8_T     | 165 | -0.307182 | -1.16546 | 0.0809249 | 0.781827 | 1 | 2417 tags=28%, list=15%, signal=33% | 0.237088  | 0.78752   | 0.936725   | 0.966213 | 1     | 2898 tags=25%, list=18%, signal=30% |
| KAECH_NAIVE_VS_DAY8_EFF_CD8_T       | 181 | -0.304023 | -1.16338 | 0.0685714 | 0.784531 | 1 | 3376 tags=39%, list=21%, signal=48% | -0.358408 | -1.38739  | 0.00546448 | 0.302082 | 1     | 2122 tags=31%, list=13%, signal=35% |
| GSE14308_INDUCED_VS_NATURAL_T       | 172 | -0.298429 | -1.15752 | 0.0843373 | 0.809294 | 1 | 3090 tags=33%, list=19%, signal=40% | -0.327943 | -1.25742  | 0.4008163  | 0.364514 | 1     | 2241 tags=28%, list=14%, signal=32% |
| GSE10239_MEMORY_VS_DAY4_5_EFF       | 171 | -0.299008 | -1.15246 | 0.0825243 | 0.829244 | 1 | 2672 tags=27%, list=17%, signal=33% | -0.303365 | -1.15573  | 0.085308   | 0.495439 | 1     | 2459 tags=26%, list=15%, signal=31% |
| GSE112845_IGD_NEG_BLOOD_VS_NAI      | 171 | -0.302112 | -1.14962 | 0.113402  | 0.836891 | 1 | 2153 tags=25%, list=13%, signal=28% | 0.252472  | 0.845924  | 0.384799   | 0.912444 | 1     | 3022 tags=26%, list=19%, signal=31% |
| ADENYLATE_CYCLASE_ACTIVATION        | 15  | -0.49403  | -1.14855 | 0.271795  | 0.833094 | 1 | 117 tags=13%, list=1%, signal=13%   | -0.298631 | -0.706833 | 0.888614   | 0.993906 | 1     | 105 tags=7%, list=1%, signal=7%     |
| CELL_PROJECTION_PART                | 19  | -0.453003 | -1.14841 | 0.252525  | 0.82422  | 1 | 2922 tags=37%, list=18%, signal=45% | -0.229037 | -0.590496 | 0.982143   | 0.997085 | 1     | 4590 tags=42%, list=29%, signal=59% |
| HELICASE_ACTIVITY                   | 50  | -0.366007 | -1.14608 | 0.190184  | 0.828816 | 1 | 4024 tags=52%, list=25%, signal=69% | 0.284868  | 0.813272  | 0.822653   | 0.944509 | 1     | 2746 tags=34%, list=17%, signal=41% |
| GSE17974_CTRL_VS_ACT_IL4_AND_A      | 161 | -0.296446 | -1.14545 | 0.119048  | 0.823002 | 1 | 2353 tags=29%, list=15%, signal=33% | -0.258712 | -0.996632 | 0.816753   | 0.660736 | 1     | 2288 tags=22%, list=14%, signal=25% |
| HEPARIN_BINDING                     | 20  | -0.438074 | -1.14543 | 0.255376  | 0.813773 | 1 | 2045 tags=25%, list=13%, signal=29% | -0.405585 | -1.0527   | 0.343008   | 0.579421 | 1     | 700 tags=15%, list=4%, signal=16%   |
| GSE3982_NEUTROPHIL_VS_NKCELL_C      | 174 | -0.297415 | -1.14258 | 0.111111  | 0.821445 | 1 | 4007 tags=39%, list=25%, signal=52% | 0.293736  | 0.990873  | 0.491443   | 0.749372 | 1     | 3094 tags=32%, list=19%, signal=39% |
| ACTIVATION_OF_IMMUNE_RESPONSES      | 15  | -0.478104 | -1.14251 | 0.275943  | 0.812722 | 1 | 2020 tags=33%, list=13%, signal=38% | 0.444051  | 0.995641  | 0.470978   | 0.747184 | 1     | 290 tags=13%, list=2%, signal=14%   |
| RNA_DEPENDENT_ATPASE_ACTIVITY       | 18  | -0.456621 | -1.14052 | 0.255155  | 0.815823 | 1 | 3934 tags=50%, list=25%, signal=66% | 0.469091  | 1.10509   | 0.313953   | 0.556564 | 1     | 2746 tags=50%, list=17%, signal=60% |
| GSE3982_MAC_VS_NKCELL_DN            | 161 | -0.298952 | -1.13707 | 0.117647  | 0.828157 | 1 | 1918 tags=19%, list=12%, signal=22% | -0.213677 | -0.820954 | 0.995169   | 0.978963 | 1     | 3264 tags=24%, list=20%, signal=30% |
| GSE27786_ERYTHROBLAST_VS_NEUTROPHIL | 163 | -0.301029 | -1.13576 | 0.133641  | 0.827287 | 1 | 2212 tags=22%, list=14%, signal=25% | -0.289236 | -1.09174  | 0.183673   | 0.532813 | 1     | 1652 tags=18%, list=10%, signal=20% |
| GSE22886_NAIVE_CD8_TCELL_VS_NK      | 177 | -0.296563 | -1.13458 | 0.0899471 | 0.825671 | 1 | 2617 tags=27%, list=16%, signal=32% | 0.293143  | 0.986734  | 0.502433   | 0.750872 | 1     | 2269 tags=20%, list=14%, signal=23% |
| TRANSLATION                         | 168 | -0.293851 | -1.1332  | 0.0837696 | 0.825344 | 1 | 3428 tags=40%, list=21%, signal=50% | -0.359903 | -1.39061  | 0          | 0.30943  | 1     | 1893 tags=28%, list=12%, signal=31% |
| GSE26495_PD1HIGH_VS_PD1LOW_CD8_T    | 143 | -0.299782 | -1.13013 | 0.0835355 | 0.825155 | 1 | 3251 tags=30%, list=20%, signal=37% | 0.335767  | 1.10345   | 0.260377   | 0.554894 | 1     | 2585 tags=24%, list=16%, signal=29% |
| ATP_DEPENDENT_RNA_HELICASE_AC       | 17  | -0.468614 | -1.12972 | 0.274359  | 0.829009 | 1 | 3934 tags=53%, list=25%, signal=70% | 0.525613  | 1.19502   | 0.238754   | 0.434482 | 1     | 2746 tags=53%, list=17%, signal=64% |
| SERINE_TYPE_ENDOPEPTIDASE_ACTI      | 34  | -0.383838 | -1.1258  | 0.227273  | 0.844376 | 1 | 2977 tags=24%, list=19%, signal=29% | -0.314696 | -0.928647 | 0.613079   | 0.802274 | 1     | 1779 tags=12%, list=11%, signal=13% |
| INTRINSIC_TO_ENDOPLASMIC_RETICL     | 21  | -0.424264 | -1.11962 | 0.278772  | 0.875358 | 1 | 1936 tags=29%, list=12%, signal=32% | 0.471338  | 1.13066   | 0.290016   | 0.522752 | 1     | 3688 tags=57%, list=23%, signal=74% |
| HYDRO_LYASE_ACTIVITY                | 27  | -0.399211 | -1.11927 | 0.265583  | 0.869023 | 1 | 3006 tags=41%, list=19%, signal=50% | -0.265798 | -0.739658 | 0.898844   | 0.996608 | 1     | 3358 tags=26%, list=21%, signal=33% |
| GSE360_L_MAJOR_VS_T_GONDII_MA       | 175 | -0.297549 | -1.11784 | 0.16092   | 0.869858 | 1 | 2588 tags=27%, list=16%, signal=32% | 0.293977  | 0.993074  | 0.556227   | 0.750085 | 1     | 4415 tags=38%, list=28%, signal=51% |
| GSE29617_CTRL_VS_DAY7_TIV_FLU_V     | 165 | -0.291477 | -1.11611 | 0.106599  | 0.872418 | 1 | 1219 tags=18%, list=8%, signal=19%  | -0.248908 | -0.94191  | 0.634021   | 0.774432 | 1     | 2654 tags=24%, list=14%, signal=28% |
| GSE17974_OH_VS_2H_IN_VITRO_ACT      | 163 | -0.291334 | -1.11572 | 0.15814   | 0.86659  | 1 | 2405 tags=31%, list=15%, signal=36% | -0.32026  | -1.22144  | 0.0490196  | 0.401868 | 1     | 2176 tags=26%, list=14%, signal=30% |
| GSE17721_LPS_VS_CPG_IH_BMDM_I       | 176 | -0.288576 | -1.11486 | 0.153061  | 0.8638   | 1 | 2927 tags=29%, list=18%, signal=35% | 0.347507  | 1.1784    | 0.128589   | 0.45202  | 1     | 3512 tags=30%, list=22%, signal=38% |
| GSE3982_EFF_MEMORY_VS_CENT_M        | 167 | -0.296538 | -1.11385 | 0.140777  | 0.861927 | 1 | 3082 tags=32%, list=19%, signal=39% | 0.342953  | 1.14844   | 0.166253   | 0.493475 | 1     | 2898 tags=24%, list=18%, signal=29% |
| MICROSOME                           | 36  | -0.375743 | -1.11092 | 0.256637  | 0.872693 | 1 | 58 tags=6%, list=0%, signal=6%      | 0.389446  | 1.0583    | 0.366864   | 0.647147 | 1     | 2459 tags=31%, list=15%, signal=36% |
| GSE13738_RESTING_VS_TCR_ACTIVAT     | 152 | -0.296296 | -1.11082 | 0.13587   | 0.865203 | 1 | 3045 tags=29%, list=19%, signal=35% | -0.391746 | -1.48585  | 0          | 0.310492 | 1     | 1878 tags=28%, list=12%, signal=32% |
| KAECH_DAY8_EFF_VS_MEMORY_CD8        | 185 | -0.287549 | -1.11062 | 0.142076  | 0.858378 | 1 | 2751 tags=32%, list=17%, signal=38% | -0.392277 | -1.51804  | 0          | 0.303039 | 0.998 | 2584 tags=36%, list=16%, signal=42% |
| POSITIVE_REGULATION_OF_TRANSCR      | 62  | -0.338907 | -1.11004 | 0.260377  | 0.854183 | 1 | 1641 tags=27%, list=10%, signal=30% | -0.324633 | -1.07049  | 0.307432   | 0.551669 | 1     | 2113 tags=24%, list=13%, signal=28% |
| RNA_SPLICING_FACTOR_ACTIVITYTRA     | 17  | -0.44919  | -1.10968 | 0.315166  | 0.848725 | 1 | 3141 tags=53%, list=20%, signal=66% | 0.382098  | 0.871099  | 0.65598    | 0.890541 | 1     | 1262 tags=18%, list=8%, signal=19%  |
| GSE10239_NAIVE_VS_DAY4_5_EFF_CD8_T  | 173 | -0.287371 | -1.10957 | 0.142857  | 0.841783 | 1 | 2908 tags=36%, list=18%, signal=44% | -0.369193 | -1.39744  | 0          |          |       |                                     |



Supplementary Table 3. Gene enrichment statistics for HD and control monkeys.

|                                 |     |           |          |          |          |   |                                     |           |           |            |          |       |                                     |
|---------------------------------|-----|-----------|----------|----------|----------|---|-------------------------------------|-----------|-----------|------------|----------|-------|-------------------------------------|
| GSE22886_NAIVE_BCCELL_VS_BLOOD_ | 175 | -0.280729 | -1.08455 | 0.220238 | 0.849079 | 1 | 2480 tags=27%, list=15%, signal=31% | -0.384207 | -1.46653  | 0          | 0.305386 | 1     | 1731 tags=27%, list=11%, signal=30% |
| GSE9006_HEALTHY_VS_TYPE_2_DIAB  | 181 | -0.281001 | -1.08422 | 0.196429 | 0.844818 | 1 | 1640 tags=18%, list=10%, signal=20% | 0.244822  | 0.827607  | 0.887376   | 0.928918 | 1     | 3451 tags=28%, list=21%, signal=35% |
| GSE22886_NAIVE_CD4_TCELL_VS_DC  | 166 | -0.283531 | -1.08376 | 0.202073 | 0.841425 | 1 | 2147 tags=27%, list=13%, signal=30% | -0.314418 | -1.19855  | 0.0555556  | 0.431585 | 1     | 2372 tags=31%, list=15%, signal=36% |
| GSE26928_NAIVE_VS_XCCR5_POS_CC  | 154 | -0.289539 | -1.08302 | 0.224719 | 0.839643 | 1 | 2588 tags=27%, list=16%, signal=32% | 0.233684  | 0.783033  | 0.950445   | 0.96899  | 1     | 3890 tags=27%, list=24%, signal=36% |
| GSE20366_EX_VIVO_VS_HOMEOSTAT   | 174 | -0.282326 | -1.0821  | 0.235294 | 0.83915  | 1 | 2717 tags=29%, list=17%, signal=34% | -0.243993 | -0.941388 | 0.672897   | 0.775237 | 1     | 2740 tags=26%, list=17%, signal=32% |
| GSE12366_GC_VS_NAIVE_BCCELL_DN  | 155 | -0.286411 | -1.08157 | 0.204188 | 0.836168 | 1 | 3093 tags=32%, list=19%, signal=39% | -0.428441 | -1.61732  | 0          | 0.293796 | 0.951 | 2580 tags=38%, list=16%, signal=60% |
| GSE17974_OH_VS_4H_IN_VITRO_ACT  | 173 | -0.2829   | -1.08152 | 0.206897 | 0.830369 | 1 | 2637 tags=25%, list=16%, signal=39% | 0.39361   | 1.32652   | 0.0258621  | 0.266412 | 1     | 4357 tags=26%, list=17%, signal=40% |
| GSE17721_PAM3CSK4_VS_CPG_0_5H   | 177 | -0.280024 | -1.08113 | 0.19802  | 0.826688 | 1 | 1858 tags=19%, list=12%, signal=21% | 0.231468  | 0.784916  | 0.95098    | 0.967923 | 1     | 3834 tags=28%, list=24%, signal=36% |
| GSE14350_TREG_VS_TFFF_UP        | 178 | -0.286127 | -1.08094 | 0.201058 | 0.826185 | 1 | 2968 tags=31%, list=18%, signal=38% | -0.327309 | -1.2765   | 0.00558659 | 0.35326  | 1     | 2656 tags=34%, list=17%, signal=40% |
| GSE8515_CTRL_VS_IL6_4H_STIM_MA  | 162 | -0.283235 | -1.07995 | 0.219251 | 0.821801 | 1 | 2633 tags=20%, list=16%, signal=24% | -0.208987 | -0.796547 | 0.995074   | 0.990164 | 1     | 2335 tags=24%, list=15%, signal=34% |
| GSE20715_OH_VS_GH_OZONE_TLR4_   | 172 | -0.282883 | -1.07958 | 0.204301 | 0.818038 | 1 | 2150 tags=21%, list=13%, signal=24% | 0.341192  | 1.14679   | 0.155612   | 0.496621 | 1     | 3522 tags=24%, list=22%, signal=16% |
| GSE3982_NEUTROPHIL_VS_EFF_MEM   | 176 | -0.285017 | -1.07901 | 0.232044 | 0.815728 | 1 | 4186 tags=45%, list=26%, signal=61% | -0.269068 | -1.05718  | 0.287293   | 0.577454 | 1     | 2557 tags=27%, list=16%, signal=31% |
| DAMAGED_DNA_BINDING             | 19  | -0.424554 | -1.07688 | 0.333333 | 0.822646 | 1 | 516 tags=16%, list=3%, signal=16%   | 0.541008  | 1.28321   | 0.155949   | 0.307605 | 1     | 4277 tags=68%, list=27%, signal=93% |
| GSE24634_NAIVE_CD4_TCELL_VS_DA  | 166 | -0.284145 | -1.07637 | 0.194286 | 0.820021 | 1 | 2550 tags=30%, list=16%, signal=35% | -0.318066 | -1.21621  | 0.0197044  | 0.407382 | 1     | 1755 tags=22%, list=11%, signal=24% |
| GSE1460_INTRATHYMIC_T_PROGENI   | 163 | -0.282337 | -1.07543 | 0.183784 | 0.82021  | 1 | 2574 tags=25%, list=16%, signal=29% | -0.371003 | -1.4168   | 0.0103093  | 0.295071 | 1     | 2475 tags=29%, list=15%, signal=34% |
| GSE15930_STIM_VS_STIM_AND_IFN   | 171 | -0.279142 | -1.07523 | 0.216667 | 0.815648 | 1 | 2759 tags=30%, list=17%, signal=36% | 0.390967  | 1.30816   | 0.0280971  | 0.274708 | 1     | 3247 tags=35%, list=20%, signal=44% |
| COVALENT_CHROMATIN_MODIFICAT    | 23  | -0.398907 | -1.07491 | 0.336788 | 0.811951 | 1 | 3430 tags=26%, list=21%, signal=33% | 0.388454  | 0.971899  | 0.5        | 0.717758 | 1     | 3181 tags=39%, list=20%, signal=49% |
| EXTRACELLULAR_SPACE             | 216 | -0.275202 | -1.07465 | 0.204678 | 0.808042 | 1 | 2432 tags=13%, list=15%, signal=16% | 0.254021  | 0.869903  | 0.806792   | 0.892161 | 1     | 2982 tags=13%, list=19%, signal=16% |
| GSE17721_POLYIC_VS_PAM3CSK4_0_  | 184 | -0.280594 | -1.07372 | 0.194118 | 0.807816 | 1 | 2214 tags=21%, list=14%, signal=24% | 0.346162  | 1.1709    | 0.125466   | 0.464321 | 1     | 3172 tags=27%, list=20%, signal=33% |
| GSE24634_NAIVE_CD4_TCELL_VS_DA  | 168 | -0.279486 | -1.07339 | 0.232044 | 0.80446  | 1 | 2751 tags=29%, list=17%, signal=34% | -0.319584 | -1.22249  | 0.0336538  | 0.401214 | 1     | 2632 tags=32%, list=16%, signal=38% |
| GSE18791_CTRL_VS_NEWCASTLE_VIR  | 145 | -0.286985 | -1.0732  | 0.221106 | 0.800075 | 1 | 3652 tags=32%, list=23%, signal=42% | -0.24666  | -0.924588 | 0.696035   | 0.809897 | 1     | 1750 tags=18%, list=11%, signal=20% |
| GSE1460_INTRATHYMIC_T_PROGENI   | 171 | -0.280202 | -1.07225 | 0.2      | 0.800598 | 1 | 2135 tags=27%, list=13%, signal=31% | 0.296515  | 0.995247  | 0.485498   | 0.746473 | 1     | 2967 tags=27%, list=18%, signal=34% |
| GSE3982_DC_VS_CENT_MEMORY_CD    | 167 | -0.280693 | -1.07196 | 0.227778 | 0.796952 | 1 | 3570 tags=32%, list=22%, signal=41% | -0.283807 | -1.08506  | 0.189744   | 0.540912 | 1     | 2903 tags=28%, list=18%, signal=33% |
| GSE3982_MAC_VS_BASOPHIL_DN      | 168 | -0.278133 | -1.07121 | 0.192308 | 0.796141 | 1 | 3022 tags=30%, list=19%, signal=37% | -0.313972 | -1.19765  | 0.0591398  | 0.429516 | 1     | 3287 tags=33%, list=20%, signal=41% |
| HISTONE_MODIFICATION            | 23  | -0.398907 | -1.07068 | 0.319672 | 0.793997 | 1 | 3430 tags=26%, list=21%, signal=33% | 0.388454  | 0.962924  | 0.95908    | 0.773211 | 1     | 3181 tags=39%, list=20%, signal=49% |
| GSE30083_SP3_VS_SP4_THYMOCYTE   | 170 | -0.280851 | -1.07026 | 0.235632 | 0.791422 | 1 | 1963 tags=24%, list=12%, signal=27% | 0.299692  | 0.995619  | 0.481108   | 0.746167 | 1     | 2849 tags=29%, list=18%, signal=35% |
| GSE17974_IL4_AND_ANTIL12_VS_U   | 146 | -0.282934 | -1.06766 | 0.252525 | 0.80113  | 1 | 2099 tags=19%, list=13%, signal=22% | -0.25056  | -0.951661 | 0.59292    | 0.766687 | 1     | 2389 tags=17%, list=15%, signal=20% |
| GSE15930_STIM_VS_STIM_AND_TRIC  | 172 | -0.280555 | -1.06739 | 0.246073 | 0.79767  | 1 | 3020 tags=25%, list=19%, signal=30% | 0.335429  | 1.12634   | 0.189055   | 0.534384 | 1     | 2582 tags=21%, list=16%, signal=25% |
| GSE3982_BCCELL_VS_EFF_MEMORY_CD | 165 | -0.280602 | -1.06723 | 0.248705 | 0.793591 | 1 | 2300 tags=24%, list=14%, signal=28% | 0.301344  | 1.00358   | 0.447704   | 0.737887 | 1     | 2904 tags=25%, list=18%, signal=31% |
| KAECH_DAY15_EFF_VS_MEMORY_CD    | 184 | -0.277104 | -1.06545 | 0.248588 | 0.798776 | 1 | 2980 tags=32%, list=19%, signal=38% | -0.318036 | -1.23144  | 0.0102564  | 0.390273 | 1     | 2796 tags=30%, list=17%, signal=36% |
| GSE6269_HEALTHY_VS_E_CELL_INF_F | 147 | -0.283566 | -1.05921 | 0.269231 | 0.830339 | 1 | 2703 tags=31%, list=17%, signal=37% | 0.389423  | 1.28882   | 0.0418251  | 0.340496 | 1     | 2898 tags=34%, list=18%, signal=41% |
| L_AMINO_ACID_TRANSMEMBRANE_1    | 17  | -0.427703 | -1.05917 | 0.349869 | 0.825472 | 1 | 4009 tags=29%, list=25%, signal=39% | -0.294487 | -0.719335 | 0.0993739  | 0.993739 | 1     | 991 tags=12%, list=6%, signal=13%   |
| COENZYME_METABOLIC_PROCESS      | 33  | -0.372206 | -1.05698 | 0.344538 | 0.833455 | 1 | 1496 tags=21%, list=9%, signal=23%  | -0.30343  | -0.871772 | 0.676829   | 0.912169 | 1     | 3387 tags=39%, list=21%, signal=50% |
| NEGATIVE_REGULATION_OF_TRANSF   | 32  | -0.364885 | -1.05431 | 0.365156 | 0.844307 | 1 | 2234 tags=34%, list=14%, signal=40% | -0.363754 | -1.05582  | 0.331361   | 0.57838  | 1     | 4004 tags=47%, list=25%, signal=62% |
| MITOCHONDRIAL_PART              | 130 | -0.283276 | -1.05182 | 0.293333 | 0.854574 | 1 | 4115 tags=42%, list=26%, signal=55% | 0.386651  | 1.25994   | 0.0813954  | 0.344185 | 1     | 3535 tags=35%, list=22%, signal=45% |
| GSE2706_LPS_VS_R848_AND_LPS_2H  | 116 | -0.288453 | -1.05138 | 0.321586 | 0.852132 | 1 | 2195 tags=13%, list=14%, signal=15% | 0.276952  | 0.890889  | 0.703704   | 0.868476 | 1     | 2832 tags=17%, list=18%, signal=21% |
| GSE22886_NAIVE_BCCELL_VS_DC_UP  | 165 | -0.272461 | -1.04989 | 0.282609 | 0.856422 | 1 | 2756 tags=32%, list=17%, signal=38% | -0.348883 | -1.33151  | 0.0174673  | 0.331401 | 1     | 1858 tags=28%, list=12%, signal=31% |
| GSE29618_BCCELL_VS_PDC_DAY7_FLU | 164 | -0.274392 | -1.04937 | 0.291209 | 0.854663 | 1 | 2681 tags=26%, list=17%, signal=31% | -0.342374 | -1.30263  | 0.0188679  | 0.34651  | 1     | 2059 tags=27%, list=13%, signal=30% |
| GSE2706_R848_VS_LPS_2H_STIM_DC  | 133 | -0.283811 | -1.04896 | 0.26009  | 0.85217  | 1 | 2532 tags=24%, list=16%, signal=28% | -0.264987 | -0.99349  | 0.0640317  | 0.668915 | 1     | 1669 tags=16%, list=10%, signal=17% |
| GSE17721_0_5H_VS_4H_POLYIC_BMC  | 179 | -0.276419 | -1.04844 | 0.307292 | 0.850308 | 1 | 3568 tags=31%, list=22%, signal=39% | 0.316877  | 1.06651   | 0.31644    | 0.631166 | 1     | 3450 tags=29%, list=21%, signal=37% |
| VITAMIN_METABOLIC_PROCESS       | 16  | -0.435972 | -1.04631 | 0.386473 | 0.858241 | 1 | 330 tags=13%, list=2%, signal=13%   | 0.508229  | 1.13447   | 0.290335   | 0.516826 | 1     | 2664 tags=44%, list=17%, signal=52% |
| GSE3982_NKCELL_VS_TH1_UP        | 158 | -0.276351 | -1.04561 | 0.282828 | 0.857298 | 1 | 1779 tags=18%, list=11%, signal=20% | 0.30517   | 1.01146   | 0.459459   | 0.726712 | 1     | 2697 tags=22%, list=17%, signal=26% |
| GSE1460_DP_THYMOCYTE_VS_THYM    | 172 | -0.272333 | -1.04511 | 0.3      | 0.85551  | 1 | 2418 tags=23%, list=15%, signal=27% | 0.388334  | 1.31457   | 0.0279126  | 0.273181 | 1     | 3085 tags=27%, list=19%, signal=33% |
| GSE22886_NAIVE_BCCELL_VS_BM_PLA | 177 | -0.273212 | -1.04507 | 0.281407 | 0.850828 | 1 | 2847 tags=28%, list=18%, signal=34% | -0.360297 | -1.39592  | 0.005      | 0.302289 | 1     | 2453 tags=34%, list=15%, signal=40% |
| GSE3982_MAC_VS_CENT_MEMORY_C    | 164 | -0.27556  | -1.04493 | 0.309278 | 0.846842 | 1 | 3374 tags=34%, list=21%, signal=42% | 0.239365  | 0.794227  | 0.93073    | 0.960779 | 1     | 2799 tags=22%, list=17%, signal=26% |
| GSE17974_IL4_AND_ANTIL12_VS_U   | 130 | -0.284486 | -1.04402 | 0.309735 | 0.847611 | 1 | 1727 tags=14%, list=11%, signal=15% | 0.331356  | 1.07858   | 0.304749   | 0.603853 | 1     | 3602 tags=24%, list=22%, signal=30% |
| GSE27786_BCCELL_VS_CD4_TCELL_DN | 167 | -0.273778 | -1.0423  | 0.316092 | 0.853046 | 1 | 3166 tags=29%, list=20%, signal=35% | -0.329357 | -1.26399  | 0.025      | 0.37234  | 1     | 2375 tags=27%, list=15%, signal=31% |
| GSE18791_CTRL_VS_NEWCASTLE_VIR  | 158 | -0.278378 | -1.04223 | 0.322727 | 0.848694 | 1 | 2552 tags=31%, list=16%, signal=37% | -0.2586   | -0.990297 | 0.44878    | 0.674972 | 1     | 1822 tags=20%, list=11%, signal=23% |
| KAECH_NAIVE_VS_DAY15_EFF_CD8_T  | 183 | -0.271931 | -1.04071 | 0.377778 | 0.853144 | 1 | 3286 tags=34%, list=20%, signal=43% | -0.279097 | -1.06736  | 0.256545   | 0.533538 | 1     | 1513 tags=21%, list=9%, signal=23%  |
| REGULATION_OF_BLOOD_PRESSURE    | 20  | -0.394198 | -1.04043 | 0.376022 | 0.850022 | 1 | 173 tags=10%, list=1%, signal=10%   | 0.432267  | 1.02282   | 0.435511   | 0.704864 | 1     | 264 tags=10%, list=2%, signal=10%   |
| GSE11057_NAIVE_VS_CENT_MEMOR    | 155 | -0.277504 | -1.03955 | 0.314433 | 0.850734 | 1 | 3109 tags=26%, list=19%, signal=32% | -0.381115 | -1.45025  | 0          | 0.30111  | 1     | 3060 tags=34%, list=19%, signal=42% |
| GSE1460_NAIVE_CD4_TCELL_CORE_E  | 168 | -0.271298 | -1.03899 | 0.287234 | 0.849422 | 1 | 3335 tags=29%, list=21%, signal=36% | 0.324831  | 1.09234   | 0.252451   | 0.578666 | 1     | 3883 tags=28%, list=24%, signal=37% |
| GSE14308_TH2_VS_TH17_DN         | 173 | -0.273453 | -1.0383  | 0.288136 | 0.849019 | 1 | 3218 tags=30%, list=20%, signal=37% | -0.2617   | -1.01559  | 0.38587    | 0.627335 | 1     | 3644 tags=36%, list=23%, signal=47% |
| GSE24634_IL4_VS_CTRL_TREATED_NU | 178 | -0.271217 | -1.03775 | 0.294737 | 0.847594 | 1 | 3233 tags=37%, list=20%, signal=46% | 0.272994  | 0.923083  | 0.671605   | 0.824451 | 1     | 2912 tags=24%, list=18%, signal=29% |
| AMINO_ACID_METABOLIC_PROCESS    | 73  | -0.302634 | -1.03725 | 0.351724 | 0.846028 | 1 | 3465 tags=40%, list=22%, signal=50% | 0.308818  | 0.941422  | 0.589189   | 0.800148 | 1     | 3835 tags=32%, list=24%, signal=41% |
| RHYTHMIC_PROCESS                | 26  | -0.372893 | -1.03723 | 0.377841 | 0.841615 | 1 | 2757 tags=23%, list=17%, signal=28% | -0.484016 | -1.33887  | 0.102151   | 0.342068 | 1     | 1823 tags=27%, list=11%, signal=30% |
| GSE30083_SP1_VS_SP2_THYMOCYTE   | 171 | -0.277339 | -1.03409 | 0.289474 | 0.855877 | 1 | 2102 tags=16%, list=13%, signal=19% | -0.272817 | -1.04528  | 0.271795   | 0.592666 | 1     | 3442 tags=25%, list=21%, signal=31% |
| GSE1460_NAIVE_CD4_TCELL_ADULT_  | 164 | -0.269164 | -1.03359 | 0.284916 | 0.854328 | 1 | 1869 tags=22%, list=12%, signal=25% | 0.328457  | 1.10095   | 0.24938    | 0.5599   | 1     | 3550 tags=32%, list=22%, signal=40% |
| GSE3982_MAST_CELL_VS_BCCELL_DN  | 165 | -0.273264 | -1.03348 | 0.316279 | 0.850415 | 1 | 2672 tags=25%, list=17%, signal=30% | 0.263392  | 0.885397  | 0.757764   | 0.874948 | 1     | 3818 tags=32%, list=24%, signal=42% |
| GSE13485_CTRL_VS_DAY21_YF17D_V  | 123 | -0.280079 | -1.03267 | 0.361111 | 0.850594 | 1 | 2811 tags=17%, list=18%, signal=21% | 0.204404  | 0.66018   | 1          | 0.996811 | 1     | 2646 tags=9%, list=16%, signal=11%  |
| GSE6269_HEALTHY_VS_FLU_INF_PBDN | 147 | -0.274154 | -1.03104 | 0.363158 | 0.855801 | 1 | 3379 tags=37%, list=21%, signal=47% | -0.334851 | -1.25677  | 0.0509259  | 0.363399 | 1     | 3242 tags=39%, list=20%, signal=48% |
| CELLULAR_DEFENSE_RESPONSE       | 43  | -0.337546 | -1.02933 | 0.390244 | 0.861405 | 1 | 2820 tags=33%, list=18%, signal=39% | 0.424434  | 1.17922   | 0.191679   | 0.450999 | 1     | 2025 tags=26%, list=13%, signal=29% |
| DETECTION_OF ABIOTIC_STIMULUS   | 15  | -0.42814  | -1.0271  | 0.420792 | 0.870147 | 1 | 2095 tags=13%, list=13%, signal=15% | -0.307698 | -0.738662 | 0.844706   | 0.995648 | 1     | 5364 tags=33%, list=33%, signal=50% |
| GSE12366_GC_VS_MEMORY_BCCELL_I  | 162 | -0.272919 | -1.02639 | 0.348837 | 0.870076 | 1 | 3394 tags=35%, list=21%, signal=44% | -0.379854 | -1.45779  | 0          | 0.308335 | 1     | 2464 tags=35%, list=15%, signal=41% |
| GSE17721_0_5H_VS_12H_POLYIC_BM  | 176 | -0.265386 | -1.02572 | 0.352941 | 0.869641 |   |                                     |           |           |            |          |       |                                     |

Supplementary Table 3. Gene enrichment statistics for HD and control monkeys.

|                                 |     |           |           |          |          |   |                                     |           |           |            |           |       |                                     |
|---------------------------------|-----|-----------|-----------|----------|----------|---|-------------------------------------|-----------|-----------|------------|-----------|-------|-------------------------------------|
| GSE9037_WT_VS_IRAK4_KO_LPS_1H   | 181 | -0.262981 | -1.01171  | 0.390625 | 0.885182 | 1 | 2440 tags=24%, list=15%, signal=28% | 0.207549  | 0.70037   | 0.997537   | 0.994935  | 1     | 4551 tags=34%, list=28%, signal=47% |
| GSE119794_0.5H_VS_72H_UNTREATED | 158 | -0.26998  | -1.01094  | 0.390625 | 0.885722 | 1 | 2195 tags=22%, list=14%, signal=25% | -0.312213 | -1.17972  | 0.104265   | 0.44589   | 1     | 2775 tags=32%, list=17%, signal=39% |
| GSE3982_NEUTROPHIL_VS_BCELL_DN  | 180 | -0.261119 | -1.01069  | 0.439189 | 0.883074 | 1 | 2952 tags=29%, list=18%, signal=35% | 0.292772  | 0.987382  | 0.493888   | 0.752726  | 1     | 3447 tags=37%, list=21%, signal=46% |
| GSE3982_CTRL_VS_IGE_STIM_MAST   | 165 | -0.267416 | -1.01029  | 0.426316 | 0.881373 | 1 | 3421 tags=32%, list=21%, signal=40% | 0.277952  | 0.935476  | 0.624204   | 0.805237  | 1     | 3003 tags=25%, list=19%, signal=30% |
| GSE3982_NEUTROPHIL_VS_BASOPHIL  | 183 | -0.260596 | -1.01004  | 0.417989 | 0.878761 | 1 | 3250 tags=34%, list=20%, signal=42% | 0.296745  | 1.00592   | 0.440298   | 0.73423   | 1     | 2731 tags=27%, list=17%, signal=32% |
| GSE14350_IL2R8_KO_VS_WT_TREG_I  | 165 | -0.264233 | -1.00843  | 0.427027 | 0.889326 | 1 | 2577 tags=25%, list=16%, signal=30% | -0.263893 | -1.03214  | 0.319048   | 0.607868  | 1     | 3346 tags=33%, list=21%, signal=42% |
| NEGATIVE_REGULATION_OF_TRANS    | 114 | -0.277642 | -1.00622  | 0.389831 | 0.839322 | 1 | 3596 tags=34%, list=22%, signal=44% | 0.300373  | 0.967189  | 0.534884   | 0.775715  | 1     | 2684 tags=18%, list=17%, signal=22% |
| GSE31082_DP_VS_CDB_SP_THYMOC    | 167 | -0.265707 | -1.00613  | 0.390863 | 0.889816 | 1 | 2652 tags=29%, list=17%, signal=35% | -0.247834 | -0.951449 | 0.613575   | 0.766178  | 1     | 1733 tags=19%, list=11%, signal=21% |
| GSE14308_TH1_VS_NATURAL_TREG    | 180 | -0.262197 | -1.00585  | 0.413979 | 0.887462 | 1 | 2823 tags=28%, list=18%, signal=34% | 0.290321  | 0.934214  | 0.534214   | 0.763266  | 1     | 3742 tags=32%, list=23%, signal=41% |
| GSE360_CTRL_VS_T_GONDI_MAC_U    | 181 | -0.265699 | -1.00456  | 0.429379 | 0.891005 | 1 | 3784 tags=35%, list=24%, signal=46% | 0.311388  | 1.04944   | 0.343101   | 0.663177  | 1     | 3390 tags=31%, list=21%, signal=39% |
| GSE3982_EFF_MEMORY_CD4_TCELL    | 166 | -0.264066 | -1.00452  | 0.368159 | 0.887201 | 1 | 2571 tags=25%, list=16%, signal=30% | 0.310024  | 1.04889   | 0.364547   | 0.664123  | 1     | 2909 tags=25%, list=18%, signal=31% |
| ESTABLISHMENT_OF_ORGANELLE_LO   | 17  | -0.411013 | -1.00267  | 0.447028 | 0.894164 | 1 | 2737 tags=41%, list=17%, signal=50% | 0.697999  | 1.61138   | 0.00654665 | 0.0688067 | 0.979 | 2459 tags=47%, list=15%, signal=56% |
| GSE11864_CSF1_VS_CSF1_IFNG_IN_A | 161 | -0.264106 | -1.00191  | 0.418478 | 0.894262 | 1 | 3071 tags=29%, list=19%, signal=36% | 0.304332  | 1.02046   | 0.410419   | 0.708755  | 1     | 2229 tags=19%, list=14%, signal=21% |
| GENERAL_RNA_POLYMERASE_II_TRAI  | 30  | -0.356105 | -1.00167  | 0.431487 | 0.892422 | 1 | 3199 tags=40%, list=20%, signal=50% | 0.371462  | 0.96143   | 0.515974   | 0.774099  | 1     | 1189 tags=13%, list=7%, signal=14%  |
| GSE13485_CTRL_VS_DAY1_YF17D_VA  | 120 | -0.274009 | -0.999799 | 0.467532 | 0.899432 | 1 | 3497 tags=16%, list=22%, signal=20% | -0.211446 | -0.766491 | 0.982063   | 0.993659  | 1     | 4233 tags=16%, list=26%, signal=21% |
| RRNA_METABOLIC_PROCESS          | 16  | -0.417221 | -0.997914 | 0.429348 | 0.906556 | 1 | 4478 tags=69%, list=28%, signal=95% | -0.274647 | -0.6825   | 0.934118   | 0.991333  | 1     | 1604 tags=19%, list=10%, signal=21% |
| GSE10239_MEMORY_VS_KURGINT_E    | 167 | -0.261778 | -0.997749 | 0.469274 | 0.903634 | 1 | 2864 tags=24%, list=18%, signal=29% | -0.288878 | -1.09864  | 0.188119   | 0.523823  | 1     | 2873 tags=26%, list=18%, signal=32% |
| FEEDING_BEHAVIOR                | 21  | -0.382134 | -0.996874 | 0.444444 | 0.905012 | 1 | 2020 tags=5%, list=13%, signal=5%   | 0.397693  | 0.967722  | 0.526756   | 0.776454  | 1     | 5973 tags=19%, list=37%, signal=30% |
| GSE12366_PLASMA_CELL_VS_NAIVE_U | 170 | -0.261142 | -0.994929 | 0.491329 | 0.912658 | 1 | 3630 tags=34%, list=23%, signal=44% | -0.34231  | -1.31612  | 0.0152284  | 0.334443  | 1     | 3450 tags=44%, list=21%, signal=55% |
| GSE11924_TH1_VS_TH17_CD4_TCELL  | 174 | -0.259073 | -0.994777 | 0.423077 | 0.909573 | 1 | 2449 tags=25%, list=15%, signal=29% | -0.274813 | -1.05465  | 0.268041   | 0.578759  | 1     | 2521 tags=25%, list=16%, signal=29% |
| GSE22886_NAIVE_TCELL_VS_NKCELL  | 175 | -0.262191 | -0.994571 | 0.488095 | 0.906784 | 1 | 2713 tags=27%, list=17%, signal=33% | -0.268719 | -1.01544  | 0.373737   | 0.626553  | 1     | 2526 tags=29%, list=16%, signal=34% |
| TRANSFORMING_GROWTH_FACTOR_U    | 31  | -0.345886 | -0.993883 | 0.464674 | 0.906923 | 1 | 4118 tags=39%, list=26%, signal=52% | -0.537887 | -1.55054  | 0.0229226  | 0.295121  | 0.994 | 1755 tags=42%, list=11%, signal=47% |
| GSE14308_TH2_VS_NAIVE_CD4_TCELL | 176 | -0.262959 | -0.993639 | 0.475    | 0.904506 | 1 | 2103 tags=22%, list=13%, signal=25% | -0.310184 | -1.19455  | 0.0765306  | 0.427441  | 1     | 3904 tags=40%, list=24%, signal=52% |
| MEDIATOR_COMPLEX                | 18  | -0.403527 | -0.992772 | 0.446701 | 0.905645 | 1 | 3201 tags=44%, list=20%, signal=55% | -0.50373  | -1.28633  | 0.140212   | 0.352021  | 1     | 2637 tags=33%, list=16%, signal=40% |
| NUCLEAR_LUMEN                   | 347 | -0.237979 | -0.992267 | 0.526882 | 0.904784 | 1 | 3543 tags=33%, list=22%, signal=42% | 0.281025  | 1.00797   | 0.460157   | 0.730759  | 1     | 3312 tags=28%, list=21%, signal=34% |
| POSITIVE_REGULATION_OF_T_CELL_A | 19  | -0.38627  | -0.992229 | 0.479675 | 0.901209 | 1 | 3367 tags=47%, list=21%, signal=60% | 0.431499  | 1.03267   | 0.418641   | 0.694133  | 1     | 3886 tags=47%, list=24%, signal=62% |
| GSE14000_TRANSLATED_RNA_VS_MF   | 157 | -0.26301  | -0.989831 | 0.451977 | 0.911598 | 1 | 3656 tags=38%, list=23%, signal=49% | -0.476358 | -1.82911  | 0          | 0.0698211 | 0.277 | 2259 tags=40%, list=14%, signal=46% |
| GSE1460_CD4_THYMOCYTE_VS_THYM   | 171 | -0.256944 | -0.989193 | 0.437158 | 0.911498 | 1 | 1831 tags=20%, list=11%, signal=23% | -0.23502  | -0.896656 | 0.816327   | 0.876067  | 1     | 2978 tags=25%, list=19%, signal=30% |
| GSE360_T_GONDI_VS_M_TUBERCUL    | 173 | -0.256526 | -0.988445 | 0.477157 | 0.912077 | 1 | 2367 tags=21%, list=15%, signal=25% | -0.21603  | -0.83326  | 0.957143   | 0.968122  | 1     | 1642 tags=13%, list=10%, signal=14% |
| GSE3982_MAST_CELL_VS_DC_UP      | 173 | -0.257758 | -0.98578  | 0.485714 | 0.923869 | 1 | 2673 tags=24%, list=17%, signal=29% | -0.260789 | -0.999888 | 0.442623   | 0.654678  | 1     | 2116 tags=21%, list=13%, signal=24% |
| GSE11864_CSF1_PAM3CY5_VS_CSF1   | 159 | -0.260987 | -0.984925 | 0.492537 | 0.925109 | 1 | 3759 tags=33%, list=23%, signal=42% | -0.28646  | -1.09764  | 0.182741   | 0.524827  | 1     | 2902 tags=30%, list=18%, signal=36% |
| GSE18791_CTRL_VS_NEWCASTLE_VIR  | 130 | -0.264974 | -0.984633 | 0.429264 | 0.866667 | 1 | 1326 tags=8%, list=8%, signal=9%    | 0.252087  | 0.820364  | 0.667188   | 0.936329  | 1     | 805 tags=6%, list=5%, signal=6%     |
| ORGANELLE_LUMEN                 | 413 | -0.234658 | -0.984188 | 0.577465 | 0.921675 | 1 | 3430 tags=32%, list=21%, signal=39% | 0.294294  | 1.05532   | 0.302072   | 0.65454   | 1     | 4001 tags=35%, list=25%, signal=45% |
| GSE22886_CD8_TCELL_VS_BCELL_NA  | 178 | -0.255396 | -0.983261 | 0.534884 | 0.923359 | 1 | 3399 tags=32%, list=21%, signal=40% | 0.264964  | 0.988769  | 0.72506    | 0.857455  | 1     | 2892 tags=26%, list=18%, signal=31% |
| SERINE_HYDROLASE_ACTIVITY       | 39  | -0.323478 | -0.982855 | 0.42735  | 0.923644 | 1 | 2977 tags=21%, list=19%, signal=25% | -0.338223 | -1.02047  | 0.381766   | 0.623443  | 1     | 1779 tags=13%, list=11%, signal=14% |
| GSE15930_NAIVE_VS_72H_IN_VITRO  | 182 | -0.256968 | -0.982504 | 0.508571 | 0.920351 | 1 | 3471 tags=32%, list=22%, signal=40% | 0.277576  | 0.930036  | 0.650485   | 0.811999  | 1     | 3374 tags=28%, list=21%, signal=35% |
| GSE11057_NAIVE_VS_EFF_MEMORY_U  | 154 | -0.264384 | -0.980099 | 0.490196 | 0.925734 | 1 | 2573 tags=26%, list=16%, signal=31% | -0.390206 | -1.47641  | 0          | 0.301168  | 1     | 2398 tags=32%, list=15%, signal=37% |
| VOLTAGE_GATED_POTASSIUM_CHAN    | 33  | -0.33949  | -0.980683 | 0.473837 | 0.923379 | 1 | 1824 tags=9%, list=11%, signal=10%  | 0.424369  | 1.12018   | 0.284375   | 0.534956  | 1     | 4125 tags=27%, list=26%, signal=37% |
| GSE27786_LSK_VS_MONO_MAC_UP     | 168 | -0.255521 | -0.978749 | 0.508876 | 0.931031 | 1 | 3201 tags=33%, list=20%, signal=40% | 0.251378  | 0.850432  | 0.384975   | 0.907155  | 1     | 3245 tags=26%, list=20%, signal=32% |
| GSE2706_R848_VS_R848_AND_LPS_2  | 153 | -0.257442 | -0.977957 | 0.530387 | 0.931847 | 1 | 2969 tags=25%, list=18%, signal=31% | -0.244756 | -0.930837 | 0.751244   | 0.800476  | 1     | 3336 tags=25%, list=21%, signal=31% |
| GSE9037_WT_VS_IRAK4_KO_LPS_4H   | 170 | -0.254795 | -0.977728 | 0.557471 | 0.929432 | 1 | 2302 tags=20%, list=14%, signal=23% | -0.24056  | -0.927524 | 0.756282   | 0.803918  | 1     | 3277 tags=29%, list=20%, signal=36% |
| GSE17721_12H_VS_24H_LPS_BMDM    | 179 | -0.257934 | -0.977349 | 0.520468 | 0.927825 | 1 | 2631 tags=25%, list=16%, signal=30% | -0.223696 | -0.866878 | 0.912371   | 0.918023  | 1     | 2973 tags=25%, list=19%, signal=30% |
| GSE9006_TPE_1_DIABETES_AT_DX_1  | 167 | -0.259777 | -0.976576 | 0.491892 | 0.92855  | 1 | 3393 tags=33%, list=21%, signal=41% | -0.365869 | -1.38973  | 0.00873663 | 0.306377  | 1     | 2337 tags=28%, list=15%, signal=32% |
| MRNA_BINDING                    | 22  | -0.37171  | -0.97648  | 0.486559 | 0.925455 | 1 | 1591 tags=23%, list=10%, signal=25% | -0.615958 | -1.60734  | 0.015873   | 0.294423  | 0.96  | 3874 tags=68%, list=24%, signal=90% |
| POSITIVE_REGULATION_OF_LYMPHOI  | 22  | -0.377818 | -0.976148 | 0.485255 | 0.923887 | 1 | 3367 tags=45%, list=21%, signal=57% | 0.451891  | 1.09867   | 0.328612   | 0.548946  | 1     | 3886 tags=50%, list=24%, signal=66% |
| MEMBRANE_ENCLOSED_LUMEN         | 413 | -0.234658 | -0.974801 | 0.712644 | 0.928074 | 1 | 3430 tags=32%, list=21%, signal=39% | 0.294294  | 1.06169   | 0.297593   | 0.641616  | 1     | 4001 tags=35%, list=25%, signal=45% |
| GSE17721_LPS_VS_CPG_24H_BMDM    | 178 | -0.258384 | -0.974725 | 0.525424 | 0.924919 | 1 | 2713 tags=24%, list=17%, signal=29% | 0.309309  | 1.0512    | 0.325443   | 0.661121  | 1     | 3303 tags=27%, list=21%, signal=37% |
| GSE27786_LNK_NEG_VS_NKTCCELL_DN | 182 | -0.254534 | -0.972593 | 0.601156 | 0.933367 | 1 | 1968 tags=20%, list=12%, signal=23% | -0.30631  | -1.17155  | 0.0710901  | 0.452729  | 1     | 2299 tags=24%, list=14%, signal=28% |
| REGULATION_OF_GENE_EXPRESSION   | 29  | -0.344111 | -0.972407 | 0.478873 | 0.930763 | 1 | 2222 tags=24%, list=14%, signal=28% | -0.360061 | -1.01366  | 0.389778   | 0.623394  | 1     | 3155 tags=41%, list=20%, signal=51% |
| GSE26495_NAIVE_VS_PD1LOW_CDB_   | 168 | -0.256848 | -0.971854 | 0.493902 | 0.93022  | 1 | 2393 tags=24%, list=15%, signal=28% | 0.305862  | 1.02041   | 0.412718   | 0.708409  | 1     | 2963 tags=29%, list=18%, signal=35% |
| VIRAL_REPRODUCTION              | 36  | -0.331639 | -0.971835 | 0.508671 | 0.926714 | 1 | 2540 tags=28%, list=16%, signal=33% | -0.278988 | -0.822225 | 0.805389   | 0.980277  | 1     | 2108 tags=19%, list=13%, signal=22% |
| GSE13738_RESTING_VS_BYSTANDER_U | 153 | -0.257239 | -0.96991  | 0.520468 | 0.93416  | 1 | 2642 tags=25%, list=16%, signal=29% | -0.38771  | -1.46529  | 0          | 0.299598  | 1     | 2592 tags=33%, list=16%, signal=39% |
| GSE360_HIGH_VS_LOW_DOSE_B_MA    | 180 | -0.254228 | -0.969127 | 0.569149 | 0.934857 | 1 | 2932 tags=29%, list=18%, signal=35% | 0.255385  | 0.862285  | 0.798257   | 0.899158  | 1     | 3201 tags=25%, list=20%, signal=31% |
| NUCLEOLUS                       | 109 | -0.268122 | -0.967407 | 0.524229 | 0.941124 | 1 | 2928 tags=33%, list=18%, signal=40% | -0.250477 | -0.913907 | 0.746377   | 0.836558  | 1     | 2991 tags=31%, list=19%, signal=38% |
| CARBON_CARBOXYLASE_ACTIVITY     | 18  | -0.389155 | -0.966802 | 0.498694 | 0.940964 | 1 | 1600 tags=33%, list=10%, signal=37% | 0.614472  | 1.44308   | 0.0539216  | 0.156793  | 1     | 3394 tags=44%, list=21%, signal=56% |
| SERINE_TYPE_PEPTIDASE_ACTIVITY  | 38  | -0.32349  | -0.965534 | 0.492877 | 0.944669 | 1 | 2977 tags=21%, list=19%, signal=26% | -0.33823  | -0.997821 | 0.412903   | 0.660985  | 1     | 1779 tags=13%, list=11%, signal=15% |
| JNK_CASCADE                     | 44  | -0.312323 | -0.965266 | 0.506897 | 0.942623 | 1 | 1710 tags=20%, list=11%, signal=23% | 0.278729  | 0.768905  | 0.848802   | 0.973905  | 1     | 2186 tags=18%, list=14%, signal=21% |
| GSE3982_DC_VS_NKCELL_DN         | 162 | -0.252489 | -0.964666 | 0.62069  | 0.942663 | 1 | 3546 tags=32%, list=22%, signal=41% | 0.267253  | 0.89472   | 0.708543   | 0.864025  | 1     | 3426 tags=27%, list=21%, signal=35% |
| GSE14000_TRANSLATED_RNA_VS_MF   | 135 | -0.259813 | -0.964543 | 0.534654 | 0.939698 | 1 | 1853 tags=16%, list=12%, signal=18% | 0.262502  | 0.86062   | 0.975276   | 0.898083  | 1     | 2993 tags=21%, list=19%, signal=25% |
| GSE6269_HEALTHY_VS_STREP_AUREI  | 154 | -0.25807  | -0.963619 | 0.536458 | 0.941262 | 1 | 2766 tags=29%, list=17%, signal=34% | 0.291966  | 0.970689  | 0.525862   | 0.773065  | 1     | 3396 tags=30%, list=21%, signal=38% |
| GSE27786_LNK_NEG_VS_BCELL_DN    | 167 | -0.253059 | -0.962624 | 0.578035 | 0.943505 | 1 | 3490 tags=32%, list=22%, signal=41% | -0.276482 | -0.67312  | 0.521366   | 0.552712  | 1     | 2866 tags=26%, list=18%, signal=38% |
| GSE29618_BCELL_VS_MONOCYTE_DA   | 161 | -0.251791 | -0.962471 | 0.574359 | 0.940874 | 1 | 3581 tags=39%, list=22%, signal=50% | -0.34995  | -1.34747  | 0.00921659 | 0.330007  | 1     | 1674 tags=26%, list=10%, signal=29% |
| FEMALE_PREGNANCY                | 37  | -0.319161 | -0.962048 | 0.522255 | 0.939674 | 1 | 5241 tags=32%, list=33%, signal=48% | 0.330503  | 0.89121   | 0.657188   | 0.868021  | 1     | 1920 tags=11%, list=12%, signal=12% |
| GSE13484_UNSTIM_VS_YF17D_VACC   | 180 | -0.249714 | -0.961864 | 0.62766  | 0.937221 | 1 | 3707 tags=36%, list=23%, signal=46% | 0.261009  | 0.884874  | 0.783155   | 0.873928  | 1     | 2846 tags=22%, list=18%, signal=26% |
| GSE15930_NAIVE_VS_48H_IN_VITRO  | 170 | -0.25     |           |          |          |   |                                     |           |           |            |           |       |                                     |

Supplementary Table 3. Gene enrichment statistics for HD and control monkeys.

|                                  |     |           |           |          |          |   |                                     |           |           |            |           |       |                                     |
|----------------------------------|-----|-----------|-----------|----------|----------|---|-------------------------------------|-----------|-----------|------------|-----------|-------|-------------------------------------|
| GSE22886_NAIVE_CD4_TCELL_VS_48I  | 168 | -0.2513   | -0.953496 | 0.607735 | 0.926878 | 1 | 3571 tags=36%, list=22%, signal=46% | -0.414192 | -1.60269  | 0          | 0.283262  | 0.964 | 2666 tags=36%, list=17%, signal=50% |
| GSE360_HIGH_DOSE_B_MALAYI_VS_I   | 181 | -0.247154 | -0.951603 | 0.627119 | 0.933378 | 1 | 3412 tags=32%, list=21%, signal=40% | 0.48564   | 1.63841   | 0          | 0.0650494 | 0.923 | 3201 tags=40%, list=20%, signal=42% |
| SULFOTRANSFERASE_ACTIVITY        | 25  | -0.349944 | -0.950269 | 0.526171 | 0.93711  | 1 | 2047 tags=16%, list=13%, signal=18% | -0.500474 | -1.38734  | 0.0748663  | 0.297446  | 1     | 2065 tags=20%, list=13%, signal=23% |
| REGULATION_OF_SECRETION          | 35  | -0.324042 | -0.950061 | 0.526471 | 0.935048 | 1 | 1506 tags=17%, list=9%, signal=19%  | 0.449168  | 1.19068   | 0.075553   | 0.439846  | 1     | 3599 tags=34%, list=22%, signal=44% |
| GSE27786_LIN_NEG_VS_NEUTROPHIL   | 165 | -0.249748 | -0.949606 | 0.707447 | 0.934305 | 1 | 3393 tags=35%, list=21%, signal=44% | 0.241749  | 0.811227  | 0.921151   | 0.945877  | 1     | 3474 tags=27%, list=22%, signal=34% |
| INDUCTION_OF_APOPTOSIS_BY_EXTF   | 27  | -0.348305 | -0.948779 | 0.529891 | 0.935263 | 1 | 3479 tags=48%, list=22%, signal=61% | 0.510386  | 1.33781   | 0.0873147  | 0.254006  | 1     | 2944 tags=37%, list=18%, signal=45% |
| NEGATIVE_REGULATION_OF_RNA_MI    | 116 | -0.260579 | -0.948737 | 0.631841 | 0.93235  | 1 | 3596 tags=34%, list=22%, signal=43% | 0.30404   | 0.988553  | 0.486595   | 0.754435  | 1     | 2684 tags=19%, list=17%, signal=23% |
| GSE14000_UNSTIM_VS_4H_LPS_CD_I   | 160 | -0.256733 | -0.94855  | 0.653659 | 0.930195 | 1 | 1780 tags=21%, list=11%, signal=24% | 0.329694  | 1.10022   | 0.255373   | 0.561539  | 1     | 2635 tags=27%, list=16%, signal=32% |
| GSE36392_2_MYELOID_VS_NEI        | 183 | -0.246882 | -0.947474 | 0.691919 | 0.932655 | 1 | 2973 tags=26%, list=19%, signal=32% | 0.329671  | 1.11714   | 0.218551   | 0.542298  | 1     | 2877 tags=28%, list=18%, signal=34% |
| GSE3982_MEMORY_CD4_TCELL_VS_I    | 157 | -0.25156  | -0.946373 | 0.631285 | 0.935144 | 1 | 3072 tags=25%, list=19%, signal=30% | -0.484996 | -1.87682  | 0          | 0.0445902 | 0.147 | 2084 tags=34%, list=13%, signal=39% |
| GSE26495_NAIVE_VS_PD1HIGH_CD8    | 154 | -0.253816 | -0.945266 | 0.601036 | 0.937607 | 1 | 3056 tags=29%, list=19%, signal=36% | -0.307809 | -1.17267  | 0.0724638  | 0.455501  | 1     | 2515 tags=25%, list=16%, signal=29% |
| DEOXYRIBONUCLEASE_ACTIVITY       | 22  | -0.360861 | -0.944504 | 0.513716 | 0.938346 | 1 | 2698 tags=41%, list=17%, signal=49% | 0.686185  | 1.66678   | 0.00162866 | 0.0517466 | 0.819 | 3250 tags=55%, list=20%, signal=68% |
| GSE3982_DC_VS_EFF_MEMORY_CD4     | 168 | -0.248797 | -0.942802 | 0.668508 | 0.943688 | 1 | 3139 tags=27%, list=20%, signal=34% | 0.259003  | 0.871302  | 0.777234   | 0.890485  | 1     | 2948 tags=23%, list=18%, signal=28% |
| GSE17721_CTRL_VS_CPG_4H_BMDM     | 177 | -0.248837 | -0.942727 | 0.675127 | 0.94099  | 1 | 3222 tags=31%, list=20%, signal=38% | 0.25784   | 0.865568  | 0.803089   | 0.896139  | 1     | 2258 tags=21%, list=14%, signal=24% |
| GSE2706_UNSTIM_VS_2H_LPS_AND     | 159 | -0.247018 | -0.941582 | 0.703125 | 0.943479 | 1 | 3003 tags=30%, list=19%, signal=36% | 0.92963   | 0.978993  | 0.507078   | 0.763317  | 1     | 3138 tags=28%, list=20%, signal=35% |
| GSE17721_LPS_VS_PAM3CSK4_0_5H    | 180 | -0.239416 | -0.94145  | 0.704545 | 0.941091 | 1 | 3230 tags=24%, list=20%, signal=30% | 0.245598  | 0.824931  | 0.866258   | 0.931435  | 1     | 2596 tags=17%, list=16%, signal=20% |
| GSE3982_CENT_MEMORY_CD4_TCELL    | 164 | -0.24749  | -0.940565 | 0.659898 | 0.942379 | 1 | 3674 tags=30%, list=23%, signal=39% | -0.364791 | -1.40017  | 0          | 0.308501  | 1     | 2450 tags=29%, list=15%, signal=34% |
| RIBONUCLEOPROTEIN_COMPLEX_BIO    | 78  | -0.272238 | -0.940231 | 0.605735 | 0.941033 | 1 | 3516 tags=35%, list=22%, signal=44% | -0.365205 | -1.24231  | 0.0766283  | 0.383849  | 1     | 1798 tags=26%, list=11%, signal=29% |
| GSE17721_CTRL_VS_PAM3CSK4_0_5H   | 171 | -0.246292 | -0.939644 | 0.691489 | 0.940853 | 1 | 2713 tags=25%, list=17%, signal=30% | 0.245875  | 0.826508  | 0.887781   | 0.930599  | 1     | 3609 tags=25%, list=22%, signal=32% |
| STRESS_ACTIVATED_PROTEIN_KINASE  | 46  | -0.299217 | -0.939376 | 0.562691 | 0.93907  | 1 | 1710 tags=20%, list=11%, signal=22% | 0.297246  | 0.837088  | 0.78739    | 0.917825  | 1     | 2186 tags=20%, list=14%, signal=23% |
| GSE22886_NAIVE_CD8_TCELL_VS_NE   | 177 | -0.245172 | -0.936748 | 0.693989 | 0.948819 | 1 | 3694 tags=38%, list=23%, signal=49% | -0.267945 | -1.03869  | 0.292553   | 0.600149  | 1     | 2450 tags=27%, list=15%, signal=32% |
| GSE11864_UNTREATED_VS_CSF1_IFN   | 180 | -0.242303 | -0.936494 | 0.713376 | 0.947074 | 1 | 3112 tags=30%, list=19%, signal=37% | 0.34189   | 1.1668    | 0.127427   | 0.469665  | 1     | 3374 tags=36%, list=21%, signal=45% |
| GSE39820_CTRL_VS_TGFBETA1_IL6_I  | 173 | -0.246431 | -0.935867 | 0.672222 | 0.947051 | 1 | 2023 tags=18%, list=13%, signal=20% | 0.837461  | 1.3111    | 0.023199   | 0.274694  | 1     | 3653 tags=38%, list=23%, signal=49% |
| NUCLEOPLASM                      | 257 | -0.234782 | -0.935565 | 0.783582 | 0.945473 | 1 | 3430 tags=32%, list=21%, signal=40% | 0.317604  | 1.10471   | 0.209467   | 0.555184  | 1     | 2490 tags=23%, list=16%, signal=26% |
| GSE9037_CTRL_VS_LPS_1H_STIM_IRA  | 182 | -0.245985 | -0.935104 | 0.718232 | 0.944682 | 1 | 2338 tags=20%, list=15%, signal=24% | -0.274799 | -1.0546   | 0.577462   | 0.577462  | 1     | 2771 tags=26%, list=17%, signal=24% |
| GSE29614_CTRL_VS_DAY3_TIV_FLU_I  | 134 | -0.253889 | -0.934885 | 0.658986 | 0.942228 | 1 | 3466 tags=19%, list=22%, signal=24% | 0.279507  | 0.924503  | 0.645204   | 0.821542  | 1     | 2899 tags=16%, list=18%, signal=20% |
| GSE17721_PAM3CSK4_VS_CPG_1H_B    | 168 | -0.247874 | -0.934786 | 0.687151 | 0.940268 | 1 | 2323 tags=21%, list=14%, signal=24% | 0.404709  | 1.35539   | 0.016109   | 0.235684  | 1     | 3057 tags=35%, list=22%, signal=44% |
| GSE12845_NAIVE_VS_DARKZONE_GC    | 167 | -0.245236 | -0.932653 | 0.682927 | 0.947346 | 1 | 2436 tags=21%, list=15%, signal=24% | -0.268524 | -1.0207   | 0.362385   | 0.624787  | 1     | 2027 tags=20%, list=13%, signal=23% |
| GSE37416_CTRL_VS_48H_F_TULAREN   | 157 | -0.245665 | -0.931853 | 0.733333 | 0.947099 | 1 | 2771 tags=25%, list=17%, signal=30% | 0.258053  | 0.860303  | 0.818523   | 0.897931  | 1     | 1619 tags=13%, list=10%, signal=15% |
| GSE3982_BCCELL_VS_CENT_MEMORY    | 160 | -0.246137 | -0.931449 | 0.730337 | 0.946898 | 1 | 2287 tags=18%, list=14%, signal=20% | -0.321143 | -1.21506  | 0.0585886  | 0.408272  | 1     | 1438 tags=15%, list=9%, signal=16%  |
| GSE17974_IL4_AND_ANTIL_IL2_VS_U  | 147 | -0.251234 | -0.930262 | 0.676471 | 0.949404 | 1 | 4013 tags=34%, list=25%, signal=45% | 0.287481  | 0.947271  | 0.59383    | 0.79175   | 1     | 2384 tags=22%, list=15%, signal=26% |
| GSE10325_CD4_TCELL_VS_LUPUS_CD   | 167 | -0.245352 | -0.929247 | 0.693878 | 0.951136 | 1 | 2368 tags=26%, list=15%, signal=30% | 0.308219  | 1.03505   | 0.374046   | 0.690612  | 1     | 2767 tags=22%, list=17%, signal=35% |
| PHOSPHOINOSITIDE_BINDING         | 20  | -0.369386 | -0.929228 | 0.571429 | 0.948272 | 1 | 2988 tags=40%, list=19%, signal=49% | 0.330137  | 0.796783  | 0.763458   | 0.958801  | 1     | 3886 tags=45%, list=24%, signal=59% |
| GSE17974_IL4_AND_ANTIL_IL2_VS_U  | 149 | -0.247629 | -0.928949 | 0.657895 | 0.94653  | 1 | 3052 tags=24%, list=19%, signal=30% | 0.320965  | 1.06606   | 0.311757   | 0.631165  | 1     | 2215 tags=16%, list=14%, signal=19% |
| SERINE_TYR_PENDEPTIDASE_INHIB    | 23  | -0.344647 | -0.925934 | 0.553247 | 0.957236 | 1 | 241 tags=9%, list=2%, signal=9%     | -0.510377 | -1.35813  | 0.0988701  | 0.326838  | 1     | 1073 tags=13%, list=7%, signal=14%  |
| GSE17721_CTRL_VS_GARDIQUIMOD_I   | 185 | -0.236703 | -0.924621 | 0.763736 | 0.960103 | 1 | 3301 tags=32%, list=21%, signal=40% | 0.307578  | 1.05034   | 0.341646   | 0.663169  | 1     | 3336 tags=31%, list=17%, signal=38% |
| MUSCLE_DEVELOPMENT               | 83  | -0.265766 | -0.923612 | 0.646209 | 0.961637 | 1 | 903 tags=8%, list=6%, signal=9%     | 0.375667  | 1.15679   | 0.190283   | 0.485845  | 1     | 3097 tags=27%, list=19%, signal=33% |
| GSE29617_DAY3_VS_DAY7_TIV_FLU_I  | 145 | -0.245888 | -0.921725 | 0.734597 | 0.967003 | 1 | 3564 tags=39%, list=22%, signal=49% | 0.334806  | 1.115     | 0.225124   | 0.542521  | 1     | 2892 tags=28%, list=18%, signal=33% |
| GSE17721_LPS_VS_POLYIC_16H_BMC   | 184 | -0.238204 | -0.921566 | 0.764706 | 0.964724 | 1 | 3762 tags=36%, list=23%, signal=47% | 0.293474  | 0.998138  | 0.80255    | 0.743078  | 1     | 3122 tags=26%, list=19%, signal=31% |
| GSE2706_LPS_VS_R848_AND_LPS_8H   | 158 | -0.245877 | -0.921559 | 0.730965 | 0.961842 | 1 | 2532 tags=19%, list=16%, signal=22% | -0.263138 | -0.990673 | 0.4689     | 0.674592  | 1     | 3698 tags=27%, list=23%, signal=35% |
| ENDOSOME_TRANSPORT               | 22  | -0.353526 | -0.921363 | 0.552486 | 0.959818 | 1 | 1900 tags=32%, list=12%, signal=36% | -0.265506 | -0.694263 | 0.942623   | 0.4689    | 1     | 3414 tags=36%, list=21%, signal=46% |
| GSE36392_MAC_VS_NEUTROPHIL_IL2   | 168 | -0.241372 | -0.920141 | 0.778895 | 0.962017 | 1 | 3471 tags=32%, list=22%, signal=40% | -0.273566 | -1.05205  | 0.290323   | 0.579169  | 1     | 2872 tags=35%, list=18%, signal=42% |
| GSE20715_OH_VS_24H_OZONE_TLR4    | 173 | -0.240366 | -0.918466 | 0.76506  | 0.96321  | 1 | 2715 tags=23%, list=17%, signal=27% | 0.270621  | 0.910015  | 0.700255   | 0.839441  | 1     | 1607 tags=14%, list=10%, signal=16% |
| PROTEIN_TYROSINE_KINASE_ACTIVIT  | 57  | -0.286384 | -0.917196 | 0.652866 | 0.968704 | 1 | 2461 tags=23%, list=15%, signal=27% | -0.295697 | -0.953005 | 0.548701   | 0.766319  | 1     | 1463 tags=12%, list=9%, signal=13%  |
| GSE13411_NAIVE_BCCELL_VS_PLASMA  | 165 | -0.241555 | -0.916124 | 0.794521 | 0.970293 | 1 | 3421 tags=32%, list=21%, signal=40% | -0.358781 | -1.37759  | 0.0046729  | 0.300588  | 1     | 2450 tags=33%, list=15%, signal=38% |
| VIRAL_REPRODUCTIVE_PROCESS       | 31  | -0.319165 | -0.915678 | 0.608955 | 0.96927  | 1 | 2540 tags=29%, list=16%, signal=34% | -0.294468 | -0.84041  | 0.70442    | 0.963035  | 1     | 2108 tags=19%, list=13%, signal=22% |
| GSE360_LOW_DOSE_B_MALAYI_VS_B    | 178 | -0.236082 | -0.914695 | 0.757732 | 0.969283 | 1 | 3059 tags=28%, list=19%, signal=34% | -0.280636 | -1.08218  | 0.193396   | 0.541006  | 1     | 2124 tags=22%, list=13%, signal=25% |
| GSE29615_DAY3_VS_DAY7_LAIIV_FLU  | 140 | -0.245535 | -0.914487 | 0.734177 | 0.966834 | 1 | 1845 tags=16%, list=11%, signal=18% | 0.333489  | 1.10248   | 0.242581   | 0.55735   | 1     | 2484 tags=16%, list=15%, signal=18% |
| RESPONSE_TO_LIGHT_STIMULUS       | 38  | -0.302504 | -0.913531 | 0.634561 | 0.969526 | 1 | 3417 tags=26%, list=21%, signal=33% | 0.319745  | 0.873125  | 0.691132   | 0.890171  | 1     | 3629 tags=29%, list=23%, signal=37% |
| GSE14308_TH1_VS_INDUCED_TREG_I   | 167 | -0.242013 | -0.9134   | 0.758065 | 0.967272 | 1 | 2887 tags=22%, list=18%, signal=26% | -0.229646 | -0.871949 | 0.904523   | 0.91314   | 1     | 2579 tags=23%, list=16%, signal=27% |
| DETECTION_OF_STIMULUS            | 42  | -0.296532 | -0.910233 | 0.64497  | 0.977143 | 1 | 253 tags=5%, list=2%, signal=5%     | 0.281834  | 0.784872  | 0.827907   | 0.967518  | 1     | 3629 tags=14%, list=23%, signal=18% |
| GSE27786_CD8_TCELL_VS_NKTCCELL_I | 173 | -0.234789 | -0.909305 | 0.829545 | 0.977979 | 1 | 3843 tags=35%, list=24%, signal=46% | 0.285635  | 0.957853  | 0.56432    | 0.777993  | 1     | 2941 tags=24%, list=18%, signal=29% |
| MITOCHONDRIAL_ENVELOPE           | 87  | -0.260609 | -0.909045 | 0.670455 | 0.976217 | 1 | 3909 tags=39%, list=24%, signal=51% | 0.400302  | 1.2475    | 0.0885906  | 0.360955  | 1     | 2411 tags=28%, list=15%, signal=32% |
| GSE3982_EOSINOPHIL_VS_BCCELL_DN  | 172 | -0.238769 | -0.907999 | 0.807229 | 0.977465 | 1 | 2796 tags=27%, list=17%, signal=33% | 0.335709  | 1.1332    | 0.188206   | 0.518587  | 1     | 2845 tags=27%, list=18%, signal=32% |
| STEROID_METABOLIC_PROCESS        | 62  | -0.27476  | -0.905112 | 0.669039 | 0.985836 | 1 | 643 tags=8%, list=4%, signal=8%     | 0.390788  | 1.15814   | 0.188732   | 0.483931  | 1     | 4226 tags=32%, list=26%, signal=44% |
| MITOCHONDRIAL_RESPIRATORY_CHA    | 22  | -0.342676 | -0.904449 | 0.56338  | 0.986525 | 1 | 3163 tags=50%, list=20%, signal=62% | 0.62849   | 1.52473   | 0.0165289  | 0.112889  | 1     | 1513 tags=41%, list=9%, signal=45%  |
| GSE13306_TREG_VS_TCONV_LAMINIA   | 171 | -0.234911 | -0.903881 | 0.804469 | 0.985057 | 1 | 3201 tags=26%, list=20%, signal=32% | -0.259344 | -1.00055  | 0.451923   | 0.653117  | 1     | 2726 tags=22%, list=17%, signal=26% |
| ACTIN_FILAMENT                   | 17  | -0.375409 | -0.903834 | 0.587927 | 0.982383 | 1 | 542 tags=18%, list=3%, signal=18%   | 0.370463  | 0.856329  | 0.682109   | 0.903948  | 1     | 1940 tags=18%, list=12%, signal=20% |
| STRUCTURAL_MOLECULE_ACTIVITY     | 222 | -0.229899 | -0.901326 | 0.847561 | 0.989192 | 1 | 3847 tags=37%, list=24%, signal=48% | -0.486811 | -1.92304  | 0          | 0.0270477 | 0.072 | 2309 tags=32%, list=14%, signal=37% |
| GSE3982_MAC_VS_EFF_MEMORY_CC     | 161 | -0.23787  | -0.901236 | 0.822581 | 0.986638 | 1 | 2810 tags=24%, list=18%, signal=28% | 0.242809  | 0.813023  | 0.9125     | 0.944507  | 1     | 3251 tags=23%, list=20%, signal=29% |
| ACETYLGLUCOSAMINYLTRANSFERASE    | 16  | -0.370592 | -0.898014 | 0.598558 | 0.957559 | 1 | 1152 tags=25%, list=7%, signal=27%  | 0.404699  | 0.916558  | 0.560331   | 0.833144  | 1     | 246 tags=13%, list=2%, signal=13%   |
| HEMATOPOIETIN_INTERFERON_CLAS    | 25  | -0.328716 | -0.896921 | 0.615176 | 0.966873 | 1 | 2267 tags=16%, list=14%, signal=19% | 0.429662  | 1.09819   | 0.3392     | 0.565316  | 1     | 4645 tags=36%, list=29%, signal=51% |
| GSE20715_WT_VS_TLR4_KO_6H_OZC    | 171 | -0.236571 | -0.896238 | 0.847134 | 0.996588 | 1 | 3516 tags=31%, list=22%, signal=39% | 0.273262  | 0.920769  | 0.670717   | 0.827119  | 1     | 2722 tags=23%, list=17%, signal=28% |
| GSE11864_UNTREATED_VS_CSF1_PAI   | 161 | -0.235377 | -0.895623 | 0.834146 | 0.995984 | 1 | 3470 tags=30%, list=22%, signal=38% | 0.243815  | 0.817248  | 0.902864   | 0.940408  | 1     | 3250 tags=25%, list=20%, signal=32% |
| INTEGRAL_TO_ORGANELLE_MEMBRA</   |     |           |           |          |          |   |                                     |           |           |            |           |       |                                     |

Supplementary Table 3. Gene enrichment statistics for HD and control monkeys.

|                                  |     |           |           |          |          |   |                                     |           |           |           |           |       |                                     |
|----------------------------------|-----|-----------|-----------|----------|----------|---|-------------------------------------|-----------|-----------|-----------|-----------|-------|-------------------------------------|
| GSE18791_UNSTIM_VS_NEWCATSLE     | 163 | -0.232706 | -0.8782   | 0.882653 | 1        | 1 | 3052 tags=28%, list=19%, signal=34% | 0.256266  | 0.855372  | 0.814721  | 0.904422  | 1     | 2553 tags=21%, list=16%, signal=25% |
| TRANSMEMBRANE_RECEPTOR_PROTI     | 38  | -0.298895 | -0.877988 | 0.784663 | 1        | 1 | 3620 tags=26%, list=23%, signal=34% | -0.314865 | -0.938376 | 0.540773  | 0.782195  | 1     | 2506 tags=16%, list=16%, signal=19% |
| GSE27786_CD4_TCELL_VS_NKCELL_U   | 161 | -0.232588 | -0.876941 | 0.844221 | 1        | 1 | 2996 tags=20%, list=19%, signal=25% | -0.244683 | -0.94882  | 0.641414  | 0.765349  | 1     | 2711 tags=22%, list=17%, signal=26% |
| GSE3982_EFF_MEMORY_CD4_TCELL     | 161 | -0.227875 | -0.876897 | 0.901554 | 1        | 1 | 3412 tags=25%, list=21%, signal=31% | -0.286008 | -1.10368  | 0.154508  | 0.518189  | 1     | 1929 tags=18%, list=12%, signal=20% |
| INTRINSIC_TO_ORGANELLE_MEMBRA    | 48  | -0.276945 | -0.87576  | 0.760656 | 1        | 1 | 3132 tags=38%, list=20%, signal=46% | 0.451715  | 1.30834   | 0.080597  | 0.275046  | 1     | 3695 tags=52%, list=23%, signal=67% |
| GSE13229_MATURE_VS_INTMATURE     | 176 | -0.226692 | -0.874148 | 0.912371 | 1        | 1 | 2770 tags=23%, list=17%, signal=28% | -0.323541 | -1.24074  | 0.0516432 | 0.385297  | 1     | 2697 tags=31%, list=17%, signal=36% |
| NUCLEOTIDE_EXCISION_REPAIR       | 19  | -0.349524 | -0.874015 | 0.645729 | 1        | 1 | 4046 tags=42%, list=25%, signal=56% | 0.513108  | 1.42973   | 0.185621  | 0.405574  | 1     | 2642 tags=19%, list=16%, signal=50% |
| GSE17721_LPS_VS_CPG_0_5H_BMDM    | 177 | -0.228759 | -0.873506 | 0.893617 | 1        | 1 | 1744 tags=15%, list=11%, signal=16% | 0.288631  | 0.969894  | 0.543404  | 0.773704  | 1     | 3777 tags=32%, list=24%, signal=41% |
| GSE27786_CD8_TCELL_VS_NEUTROPHI  | 174 | -0.231845 | -0.872628 | 0.890909 | 0.999803 | 1 | 3608 tags=33%, list=22%, signal=43% | -0.339266 | -1.29478  | 0.0111111 | 0.349992  | 1     | 3297 tags=35%, list=21%, signal=44% |
| GSE37416_CTRL_VS_OH_F_TULARENS   | 145 | -0.232885 | -0.871838 | 0.869565 | 0.999229 | 1 | 1864 tags=12%, list=12%, signal=13% | -0.226682 | -0.863513 | 0.93133   | 0.924304  | 1     | 2082 tags=11%, list=13%, signal=13% |
| GSE18791_CTRL_VS_NEWCATSLE_VIR   | 166 | -0.229077 | -0.870789 | 0.910995 | 1        | 1 | 3674 tags=32%, list=23%, signal=41% | 0.290468  | 0.978973  | 0.93744   | 0.762859  | 1     | 2432 tags=21%, list=15%, signal=25% |
| GSE360_CTRL_VS_L_MAJOR_MAC_UF    | 173 | -0.230345 | -0.870086 | 0.94186  | 0.998564 | 1 | 3238 tags=28%, list=20%, signal=34% | 0.31435   | 1.0654    | 0.317224  | 0.633107  | 1     | 3226 tags=27%, list=20%, signal=34% |
| GSE32423_IL7_VS_IL4_MEMORY_CDE   | 171 | -0.228955 | -0.869332 | 0.887097 | 0.99793  | 1 | 3128 tags=26%, list=19%, signal=32% | 0.353824  | 1.19537   | 0.0942928 | 0.433889  | 1     | 2990 tags=28%, list=19%, signal=34% |
| GSE17721_LPS_VS_GARDIQUIMOD_1    | 184 | -0.226651 | -0.868518 | 0.910053 | 0.997521 | 1 | 1692 tags=16%, list=11%, signal=18% | -0.283514 | -1.09723  | 0.169082  | 0.524071  | 1     | 2925 tags=32%, list=18%, signal=39% |
| GSE17721_POLYVIC_VS_PAM3CSK4_12  | 172 | -0.227437 | -0.86825  | 0.904762 | 0.995697 | 1 | 2837 tags=24%, list=18%, signal=29% | 0.311266  | 1.03733   | 0.383838  | 0.687071  | 1     | 3681 tags=33%, list=23%, signal=43% |
| GSE32423_IL7_VS_IL7_IL4_NAIVE_CD | 174 | -0.226145 | -0.867327 | 0.918033 | 0.995443 | 1 | 2519 tags=18%, list=16%, signal=22% | -0.230067 | -0.877035 | 0.910714  | 0.908274  | 1     | 888 tags=8%, list=6%, signal=8%     |
| GLYCEROPHOSPHOLIPID_METABOLIC    | 43  | -0.283456 | -0.866705 | 0.718654 | 0.994322 | 1 | 3553 tags=40%, list=22%, signal=51% | 0.449657  | 1.26181   | 0.113293  | 0.341832  | 1     | 2129 tags=28%, list=13%, signal=32% |
| GSE29618_PRE_VS_DAY7_POST_LAVI   | 172 | -0.226458 | -0.866419 | 0.963158 | 0.992506 | 1 | 2718 tags=24%, list=17%, signal=28% | 0.239606  | 0.802995  | 0.923645  | 0.953497  | 1     | 3728 tags=30%, list=23%, signal=38% |
| NUCLEAR_HORMONE_RECEPTOR_BIN     | 27  | -0.315281 | -0.86124  | 0.696379 | 1        | 1 | 3051 tags=37%, list=19%, signal=46% | -0.256168 | -0.703129 | 0.936842  | 0.990941  | 1     | 2819 tags=26%, list=18%, signal=31% |
| GSE17721_POLYVIC_VS_GARDIQUIMO   | 173 | -0.227003 | -0.859562 | 0.921951 | 1        | 1 | 3557 tags=31%, list=22%, signal=39% | 0.324135  | 1.09419   | 0.259974  | 0.574482  | 1     | 2507 tags=24%, list=16%, signal=28% |
| RIBOSOME                         | 39  | -0.28479  | -0.8555   | 0.781711 | 1        | 1 | 4029 tags=44%, list=25%, signal=58% | -0.444001 | -1.33208  | 0.0689555 | 0.333842  | 1     | 2884 tags=46%, list=18%, signal=56% |
| MITOCHONDRIAL_MEMBRANE_PART      | 47  | -0.26991  | -0.853435 | 0.788732 | 1        | 1 | 4115 tags=47%, list=26%, signal=63% | 0.467163  | 1.31717   | 0.0917293 | 0.270909  | 1     | 1513 tags=28%, list=9%, signal=30%  |
| PEPTIDASE_ACTIVITY               | 150 | -0.225563 | -0.851789 | 0.956522 | 1        | 1 | 2558 tags=16%, list=16%, signal=19% | 0.258455  | 0.860357  | 0.799489  | 0.89827   | 1     | 3973 tags=26%, list=25%, signal=34% |
| GSE9006_HEALTHY_VS_TYPE_2_DIAB   | 170 | -0.224011 | -0.850153 | 0.928205 | 1        | 1 | 3542 tags=32%, list=22%, signal=40% | 0.403221  | 1.35371   | 0.0209618 | 0.238935  | 1     | 2943 tags=32%, list=18%, signal=39% |
| HISTONE_DEACETYLASE_COMPLEX      | 17  | -0.338877 | -0.849265 | 0.711286 | 1        | 1 | 3172 tags=35%, list=20%, signal=44% | 0.452822  | 1.05446   | 0.366667  | 0.6562    | 1     | 1095 tags=20%, list=13%, signal=25% |
| GSE36392_TYPE_2_MYELOID_VS_MA    | 172 | -0.221603 | -0.848986 | 0.955696 | 1        | 1 | 2898 tags=25%, list=18%, signal=30% | 0.279177  | 0.931701  | 0.643468  | 0.808342  | 1     | 3624 tags=32%, list=23%, signal=41% |
| GSE27786_ERYTHROBLAST_VS_NEUTR   | 171 | -0.222759 | -0.848354 | 0.964072 | 1        | 1 | 3262 tags=29%, list=20%, signal=36% | 0.272183  | 0.913488  | 0.674907  | 0.834976  | 1     | 3858 tags=34%, list=24%, signal=44% |
| GSE17721_CTRL_VS_CPG_0_5H_BMDI   | 172 | -0.223145 | -0.848142 | 0.955556 | 1        | 1 | 3481 tags=24%, list=22%, signal=30% | 0.331133  | 1.11489   | 0.211302  | 0.542346  | 1     | 3486 tags=27%, list=22%, signal=34% |
| MITOCHONDRIAL_MEMBRANE           | 77  | -0.246846 | -0.845238 | 0.846774 | 1        | 1 | 4292 tags=43%, list=27%, signal=58% | 0.403235  | 1.24751   | 0.11641   | 0.361674  | 1     | 1994 tags=25%, list=12%, signal=28% |
| GSE39820_TGFBETA1_IL6_VS_TGFBET  | 176 | -0.220775 | -0.842068 | 0.957672 | 1        | 1 | 3807 tags=30%, list=24%, signal=38% | 0.253625  | 0.853474  | 0.823163  | 0.905117  | 1     | 3002 tags=23%, list=19%, signal=28% |
| GSE25087_TREG_VS_TCONV_ADULT_U   | 156 | -0.220966 | -0.839301 | 0.947644 | 1        | 1 | 3428 tags=33%, list=21%, signal=42% | -0.296081 | -1.11828  | 0.147619  | 0.492117  | 1     | 3343 tags=36%, list=21%, signal=45% |
| GSE18791_UNSTIM_VS_NEWCATSLE     | 125 | -0.229277 | -0.838045 | 0.931034 | 1        | 1 | 2222 tags=10%, list=14%, signal=12% | 0.29213   | 0.942244  | 0.599483  | 0.799003  | 1     | 3283 tags=14%, list=20%, signal=18% |
| COFACTOR_METABOLIC_PROCESS       | 49  | -0.246633 | -0.834879 | 0.836991 | 1        | 1 | 2380 tags=24%, list=15%, signal=29% | 0.284966  | 0.814396  | 0.792847  | 0.943849  | 1     | 2672 tags=24%, list=17%, signal=29% |
| GSE22886_NAIVE_TCELL_VS_NEUTRO   | 184 | -0.216815 | -0.832577 | 0.981928 | 1        | 1 | 3128 tags=32%, list=19%, signal=39% | 0.262732  | 0.891235  | 0.749068  | 0.868437  | 1     | 2530 tags=23%, list=16%, signal=27% |
| CHROMATIN_MODIFICATION           | 51  | -0.261048 | -0.832344 | 0.818713 | 1        | 1 | 3626 tags=27%, list=23%, signal=35% | 0.26585   | 0.759833  | 0.888563  | 0.978621  | 1     | 2114 tags=20%, list=13%, signal=23% |
| NEGATIVE_REGULATION_OF_MAP_KI    | 17  | -0.340091 | -0.8315   | 0.680519 | 1        | 1 | 2234 tags=41%, list=14%, signal=48% | -0.326209 | -0.796263 | 0.872258  | 0.988985  | 1     | 3244 tags=41%, list=20%, signal=52% |
| TRANSMEMBRANE_RECEPTOR_PROTI     | 44  | -0.26788  | -0.829654 | 0.825545 | 1        | 1 | 3268 tags=25%, list=20%, signal=31% | -0.386238 | -1.18761  | 0.1571    | 0.441051  | 1     | 1664 tags=18%, list=10%, signal=20% |
| COFACTOR_BINDING                 | 22  | -0.313155 | -0.827524 | 0.754144 | 1        | 1 | 2703 tags=27%, list=17%, signal=33% | 0.467087  | 1.16454   | 0.241158  | 0.475392  | 1     | 1165 tags=23%, list=7%, signal=24%  |
| DETECTION_OF_CHEMICAL_STIMULU    | 17  | -0.336363 | -0.825268 | 0.741546 | 1        | 1 | 5612 tags=29%, list=35%, signal=45% | -0.687592 | -1.71864  | 0.0078534 | 0.174078  | 0.672 | 2828 tags=24%, list=18%, signal=29% |
| RESPONSE_TO_UV                   | 22  | -0.313006 | -0.823601 | 0.753316 | 1        | 1 | 3417 tags=32%, list=21%, signal=40% | 0.355811  | 0.862195  | 0.669394  | 0.898903  | 1     | 4063 tags=36%, list=25%, signal=49% |
| GSE27786_LSK_VS_ERYTHROBLAST_U   | 179 | -0.215858 | -0.823344 | 0.994845 | 1        | 1 | 3422 tags=30%, list=21%, signal=38% | 0.30771   | 1.04235   | 0.352258  | 0.75747   | 1     | 2007 tags=25%, list=20%, signal=31% |
| MONOOXYGENASE_ACTIVITY           | 22  | -0.304877 | -0.821107 | 0.744125 | 1        | 1 | 2225 tags=9%, list=14%, signal=11%  | -0.344735 | -0.891553 | 0.597826  | 0.884972  | 1     | 2122 tags=9%, list=13%, signal=10%  |
| PROTEASOME_COMPLEX               | 22  | -0.30289  | -0.81483  | 0.756233 | 1        | 1 | 4355 tags=50%, list=27%, signal=69% | 0.304494  | 0.73451   | 0.87619   | 0.988739  | 1     | 2176 tags=18%, list=14%, signal=21% |
| GSE360_DC_VS_MAC_B_MALAYI_LOV    | 180 | -0.21179  | -0.80759  | 0.979167 | 1        | 1 | 3712 tags=32%, list=23%, signal=41% | 0.36647   | 1.23436   | 0.0695971 | 0.381283  | 1     | 3571 tags=36%, list=22%, signal=46% |
| MITOCHONDRIAL_MATRIX             | 44  | -0.262167 | -0.806457 | 0.842105 | 1        | 1 | 4038 tags=41%, list=25%, signal=55% | 0.411889  | 1.15186   | 0.222386  | 0.491446  | 1     | 3835 tags=43%, list=24%, signal=57% |
| CELL_CORTEX                      | 33  | -0.277832 | -0.803537 | 0.840361 | 1        | 1 | 3223 tags=33%, list=20%, signal=42% | -0.320478 | -0.938599 | 0.544959  | 0.782643  | 1     | 2309 tags=27%, list=14%, signal=32% |
| EXOPEPTIDASE_ACTIVITY            | 29  | -0.282303 | -0.799535 | 0.820442 | 1        | 1 | 4095 tags=34%, list=26%, signal=46% | -0.256294 | -0.725839 | 0.927374  | 0.994002  | 1     | 3151 tags=31%, list=20%, signal=39% |
| CELLULAR_RESPIRATION             | 17  | -0.321525 | -0.797824 | 0.743842 | 1        | 1 | 3153 tags=29%, list=20%, signal=37% | 0.485482  | 1.12333   | 0.295917  | 0.533621  | 1     | 3373 tags=41%, list=21%, signal=52% |
| MITOCHONDRIAL_LUMEN              | 44  | -0.262167 | -0.797011 | 0.887789 | 1        | 1 | 4038 tags=41%, list=25%, signal=55% | 0.411889  | 1.15055   | 0.242291  | 0.49074   | 1     | 3835 tags=43%, list=24%, signal=57% |
| NUCLEAR_DNA_DIRECTED_RNA_POLI    | 17  | -0.314408 | -0.796899 | 0.75     | 1        | 1 | 3244 tags=41%, list=20%, signal=52% | 0.302427  | 0.688172  | 0.834288  | 0.99487   | 1     | 5045 tags=47%, list=31%, signal=69% |
| ORGANELLE_LOCALIZATION           | 22  | -0.297418 | -0.795305 | 0.775076 | 1        | 1 | 2737 tags=32%, list=17%, signal=38% | 0.644109  | 1.56335   | 0.0162602 | 0.0941695 | 1     | 1586 tags=36%, list=10%, signal=40% |
| DOUBLE_STRANDED_DNA_BINDING      | 30  | -0.282068 | -0.795044 | 0.831956 | 1        | 1 | 4211 tags=53%, list=26%, signal=72% | -0.334098 | -0.963992 | 0.466988  | 0.737535  | 1     | 1959 tags=33%, list=12%, signal=38% |
| OXIDOREDUCTASE_ACTIVITY_ACTING   | 21  | -0.302067 | -0.794772 | 0.796247 | 1        | 1 | 3065 tags=29%, list=19%, signal=35% | 0.342697  | 0.828659  | 0.707936  | 0.927664  | 1     | 3798 tags=43%, list=24%, signal=56% |
| REGULATION_OF_T_CELL_ACTIVATIO   | 25  | -0.288489 | -0.79286  | 0.832877 | 1        | 1 | 2432 tags=32%, list=15%, signal=38% | 0.498253  | 1.25269   | 0.151667  | 0.356325  | 1     | 2120 tags=32%, list=13%, signal=37% |
| COATED_VESICLE                   | 44  | -0.257123 | -0.790708 | 0.861671 | 1        | 1 | 2420 tags=23%, list=15%, signal=27% | 0.404326  | 1.11705   | 0.281776  | 0.541439  | 1     | 1960 tags=27%, list=12%, signal=31% |
| ELECTRON_TRANSPORT_GO_000611E    | 46  | -0.253344 | -0.786535 | 0.911765 | 1        | 1 | 2789 tags=20%, list=17%, signal=24% | 0.537763  | 1.52529   | 0.0134128 | 0.113501  | 1     | 3011 tags=39%, list=19%, signal=48% |
| ACETYLCHOLINE_BINDING            | 16  | -0.326227 | -0.785276 | 0.767677 | 1        | 1 | 2807 tags=25%, list=17%, signal=30% | -0.286278 | -0.704563 | 0.9125    | 0.991888  | 1     | 3209 tags=25%, list=20%, signal=31% |
| DNA_DIRECTED_RNA_POLYMERASE_C    | 17  | -0.314408 | -0.784823 | 0.8      | 1        | 1 | 3244 tags=41%, list=20%, signal=52% | 0.302427  | 0.704298  | 0.881356  | 0.995154  | 1     | 5045 tags=47%, list=31%, signal=69% |
| DIGESTION                        | 35  | -0.267435 | -0.784299 | 0.867036 | 1        | 1 | 2269 tags=11%, list=14%, signal=13% | -0.257707 | -0.746369 | 0.932961  | 0.996251  | 1     | 1340 tags=9%, list=8%, signal=9%    |
| RNA_POLYMERASE_COMPLEX           | 17  | -0.314408 | -0.781943 | 0.817694 | 1        | 1 | 3244 tags=41%, list=20%, signal=52% | 0.302427  | 0.704473  | 0.894825  | 0.995563  | 1     | 5045 tags=47%, list=31%, signal=69% |
| RIBONUCLEASE_ACTIVITY            | 24  | -0.288132 | -0.78002  | 0.825137 | 1        | 1 | 2667 tags=33%, list=17%, signal=40% | 0.314169  | 0.782581  | 0.796653  | 0.968166  | 1     | 1946 tags=29%, list=12%, signal=33% |
| CHEMOKINE_ACTIVITY               | 37  | -0.261405 | -0.778218 | 0.895604 | 1        | 1 | 1330 tags=8%, list=8%, signal=9%    | 0.41543   | 1.13554   |           |           |       |                                     |

Supplementary Table 3. Gene enrichment statistics for HD and control monkeys.

|                               |    |           |           |          |          |   |                                     |           |           |           |          |   |                                     |
|-------------------------------|----|-----------|-----------|----------|----------|---|-------------------------------------|-----------|-----------|-----------|----------|---|-------------------------------------|
| CELL_MATURATION               | 15 | -0.291617 | -0.694418 | 0.899015 | 1        | 1 | 5358 tags=47%, list=33%, signal=70% | -0.481928 | -1.146    | 0.290404  | 0.471554 | 1 | 373 tags=13%, list=2%, signal=14%   |
| ORGANELLAR_RIBOSOME           | 22 | -0.254862 | -0.675595 | 0.949198 | 1        | 1 | 4029 tags=41%, list=25%, signal=55% | 0.282381  | 0.702662  | 0.914191  | 0.995189 | 1 | 3779 tags=32%, list=24%, signal=42% |
| MITOCHONDRIAL_RIBOSOME        | 22 | -0.254862 | -0.67452  | 0.955801 | 1        | 1 | 4029 tags=41%, list=25%, signal=55% | 0.282381  | 0.685564  | 0.903633  | 0.99408  | 1 | 3779 tags=32%, list=24%, signal=42% |
| RNA_POLYMERASE_ACTIVITY       | 16 | -0.269387 | -0.66428  | 0.935714 | 1        | 1 | 3762 tags=38%, list=23%, signal=49% | 0.203051  | 0.456049  | 0.998377  | 0.999937 | 1 | 4798 tags=44%, list=30%, signal=62% |
| DNA_CATABOLIC_PROCESS         | 20 | -0.258058 | -0.661518 | 0.95082  | 1        | 1 | 3703 tags=40%, list=23%, signal=52% | 0.523087  | 1.2345    | 0.176471  | 0.382296 | 1 | 3851 tags=45%, list=24%, signal=59% |
| DENDRITE                      | 15 | -0.281741 | -0.659929 | 0.935135 | 1        | 1 | 2158 tags=20%, list=13%, signal=23% | 0.274116  | 0.606923  | 0.948963  | 0.99851  | 1 | 1994 tags=13%, list=12%, signal=15% |
| DETECTION_OF_EXTERNAL_STIMULU | 18 | -0.258901 | -0.648201 | 0.976623 | 1        | 1 | 253 tags=6%, list=2%, signal=6%     | 0.370114  | 0.875385  | 0.639159  | 0.889073 | 1 | 3629 tags=17%, list=23%, signal=22% |
| RIBOSOMAL_SUBUNIT             | 20 | -0.245329 | -0.644274 | 0.972603 | 1        | 1 | 3428 tags=35%, list=21%, signal=44% | -0.2773   | -0.709043 | 0.894879  | 0.994575 | 1 | 3820 tags=45%, list=24%, signal=59% |
| COATED_VESICLE_MEMBRANE       | 16 | -0.257347 | -0.625695 | 0.962025 | 1        | 1 | 3875 tags=31%, list=24%, signal=41% | 0.645064  | 1.51133   | 0.0345423 | 0.122021 | 1 | 3594 tags=56%, list=22%, signal=72% |
| MEMBRANE_COAT                 | 16 | -0.254177 | -0.624362 | 0.981865 | 1        | 1 | 3875 tags=31%, list=24%, signal=41% | 0.65605   | 1.48365   | 0.0270701 | 0.136376 | 1 | 3594 tags=63%, list=22%, signal=80% |
| COATED_MEMBRANE               | 16 | -0.254177 | -0.615039 | 0.964912 | 0.999175 | 1 | 3875 tags=31%, list=24%, signal=41% | 0.65605   | 1.46337   | 0.0344828 | 0.145276 | 1 | 3594 tags=63%, list=22%, signal=80% |
| VESICLE_COAT                  | 15 | -0.257362 | -0.611793 | 0.957606 | 0.99736  | 1 | 3875 tags=33%, list=24%, signal=44% | 0.645077  | 1.44382   | 0.0424837 | 0.156364 | 1 | 3594 tags=60%, list=22%, signal=77% |
| COLLAGEN                      | 16 | -0.245995 | -0.596608 | 0.978723 | 0.996512 | 1 | 866 tags=6%, list=5%, signal=7%     | -0.418954 | -1.04629  | 0.372881  | 0.590003 | 1 | 2773 tags=13%, list=17%, signal=15% |
